# Supplementary material for: LncRNA PART1 Promotes Proliferation and Migration, Is Associated with Cancer Stem Cells, and Alters the miRNA Landscape in Triple-Negative Breast Cancer
Source: Cancers (Basel). 2021 May 27;13(11):2644. doi: 10.3390/cancers13112644 (PMC8198907; doi:10.3390/cancers13112644)
Supplement: Supplementary file 1 [file cancers-13-02644-s001.zip]

Archive with 6 entries (6 files):
- File S1.xlsx
- File S2.xlsx
- File S3.xlsx
- File S4.xlsx
- File S5.xlsx
- cancers-1244158-supplementary.pdf
