# Supplementary material for: LncRNA PART1 Promotes Proliferation and Migration, Is Associated with Cancer Stem Cells, and Alters the miRNA Landscape in Triple-Negative Breast Cancer
Source: Cancers (Basel). 2021 May 27;13(11):2644. doi: 10.3390/cancers13112644 (PMC8198907; doi:10.3390/cancers13112644)
Supplement: Supplementary file 1 [file cancers-13-02644-s001.zip › cancers-1244158-supplementary.pdf]

# Supplementary Materials: LncRNA *PART1* Promotes Proliferation and Migration, is Associated with Cancer Stem Cells, and Alters the miRNA Landscape in Triple-Negative Breast Cancer

Brianne M. Cruickshank, Marie-Claire D. Wasson, Justin M. Brown, Wasundara Fernando, Jaganathan Venkatesh, Olivia L. Walker, Fiorella Morales-Quintanilla, Margaret L. Dahn, Dejan Vidovic, Cheryl A. Dean, Carter VanInderstine, Graham Dellaire and Paola Marcato

Table S1. Gene-specific primers.

| Gene Name           | Primer Sequence (5' to 3') |                       |
|---------------------|----------------------------|-----------------------|
|                     | Forward                    | Reverse               |
| <i>PART1</i>        | CAGGGTACGCCAACTATAGGAC     | TTCAGCTTTCAGAGCCAGT   |
| <i>NEAT1</i>        | CCTCCCTTTAACTTATCCATTAC    | TCTCTTCCTCCACCATTACCA |
| <i>DANCR</i>        | AGGAGTTCGTCTCTTACGTCT      | TGAAATACCAGCAACAGGACA |
| <i>ARF1</i>         | GTGTTCCGCAACAAGCAGG        | CAGTTCCTGTGGCGTAGTGA  |
| <i>PUM1</i>         | GGCGTTAGCATGGTGGAGTA       | CATCCCTTGGGCCAAATCCT  |
| <i>B2M</i>          | AGGCTATCCAGCGTACTCCA       | CGGATGGATGAAACCCAGAC  |
| <i>GAPDH</i>        | GGAGTCAACGGATTGTGGTCGTA    | TTCTCCATGGTGGTGAAGA   |
| <i>ACSL3</i>        | TGTTGATGGAAAGCCACCGA       | GTTTTCCATGCTGGCCTTGG  |
| <i>GPR89B</i>       | TGCTGTCAACTGCCCATACA       | GCCGTTCCAGGGCTAGAATA  |
| <i>LOC101928401</i> | GTACTCCACGGCTACATGCT       | TCCACGGAGATTCTGCTCTTG |
| <i>PPP2R3A</i>      | GTTGAGAACGATGGGCCTGA       | TTGTGCTTGGGCAGATTCT   |
| <i>BICCI</i>        | GGCCATGTTACAAGCTGCTG       | TGGCCAAGCAATCTGCGTAT  |
| <i>CDKAL1</i>       | CCTCCATCAGCAAACCGCTA       | CTGAGATGCAGCAGAGGTGT  |
| <i>KLK5</i>         | TTTTCAGAGTCCGTCTCGGC       | GGATGGATTGACCCCCTGG   |
| <i>MYO5A</i>        | GTGAGCGAGGAGCTTGATGT       | TCATCCTTGGGTGGATGGC   |
| <i>SUPT3H</i>       | GCCACATCAGAGAGGCCATT       | TTCTGCGGTAGGCATTTGT   |
| <i>ZHX2</i>         | ATGTCGTGTCCATCACCACC       | CAGGCTTCATGATGGGGGTT  |

Table S2. Oligos for cloning into pmirGLO Dual-Luciferase miRNA Target Expression Vector.

| Oligo Name         | Sequence (5' to 3')                        |
|--------------------|--------------------------------------------|
| <i>PART1</i> -WT F | GCGGCCGCCTTCCCACAGTTTTCCAAAAATGACTCAC      |
| <i>PART1</i> -WT R | TCGAGTGAGTCATTTTGGAAACTGTGGGAAGGCGGCCGAGCT |
| PART-1 MUT F       | GCGGCCGCCTTCCCACAGTTTTCCAAAAAGTCGGCAC      |
| PART-1 MUT R       | TCGAGTGCCGACTTTTGGAAACTGTGGGAAGGCGGCCGAGCT |

**Table S3.** Associations with *PART1* with hazard ratio (HR) in breast cancer patient datasets based on median expression and survival.

| Cell 2015                 |      |          |          |                 |          |
|---------------------------|------|----------|----------|-----------------|----------|
| Subtype                   | HR   | Lower CI | Upper CI | <i>p</i> -value | Sample # |
| Basal                     | 2.82 | 0.88     | 9        | 0.08            | 107      |
| Her2                      | 1.15 | 0.45     | 2.9      | 0.77            | 120      |
| LumA                      | 0.57 | 0.26     | 1.3      | 0.17            | 200      |
| LumB                      | 0.84 | 0.31     | 2.3      | 0.74            | 122      |
| TNBC                      | 1.38 | 0.46     | 4.1      | 0.56            | 82       |
| non-TNBC                  | 0.95 | 0.65     | 1.4      | 0.8             | 734      |
| All samples               | 1.09 | 0.76     | 1.6      | 0.64            | 816      |
| PanCancer Atlas           |      |          |          |                 |          |
| Subtype                   | HR   | Lower CI | Upper CI | <i>p</i> -value | Sample # |
| Basal                     | 1.45 | 0.63     | 3.4      | 0.38            | 171      |
| Her2                      | 1.85 | 0.62     | 5.5      | 0.27            | 78       |
| LumA                      | 0.63 | 0.37     | 1.1      | 0.082           | 499      |
| LumB                      | 0.75 | 0.36     | 1.5      | 0.43            | 197      |
| All samples               | 0.92 | 0.67     | 1.3      | 0.59            | 1084     |
| METABRIC                  |      |          |          |                 |          |
| Subtype                   | HR   | Lower CI | Upper CI | <i>p</i> -value | Sample # |
| Basal                     | 1.07 | 0.74     | 1.6      | 0.72            | 199      |
| claudin-low               | 0.80 | 0.53     | 1.2      | 0.3             | 199      |
| Her2                      | 0.95 | 0.69     | 1.3      | 0.77            | 220      |
| LumA                      | 0.99 | 0.8      | 1.2      | 0.91            | 679      |
| LumB                      | 1.07 | 0.85     | 1.3      | 0.58            | 461      |
| All samples               | 1.00 | 0.89     | 1.1      | 0.97            | 1758     |
| KMPlot, probe 205833_s_at |      |          |          |                 |          |
| Subtype                   | HR   | Lower CI | Upper CI | <i>p</i> -value | Sample # |
| Basal                     | 1.49 | 1.15     | 1.92     | 0.0021          | 618      |
| Her2                      | 1.17 | 0.8      | 1.72     | 0.42            | 251      |
| LumA                      | 0.87 | 0.73     | 1.03     | 0.11            | 1933     |
| LumB                      | 0.95 | 0.79     | 1.15     | 0.61            | 1149     |
| TNBC                      | 1.38 | 0.9      | 2.12     | 0.13            | 255      |
| All samples               | 0.87 | 0.73     | 1.03     | 0.11            | 3951     |

Breast cancer patient survival data based on high versus low *PART1* expression (stratified based on median expression) in tumors (RNA-seq for PanCancer Atlas and Cell 2015 dataset, and microarray for METABRIC and KMPlotter dataset) for all breast cancer patients in each cohort or in a subset of patients based on molecular subtype. For the KMPlotter analysis, two probes for *PART1* were available and assessed (205833\_s\_at, 205834\_s\_at). Hazard ratio (HR) was calculated based on the median cutoff between patient tumors with high versus low expression levels of *PART1*. The sample # represents the number of patient tumor samples. Confidence interval is abbreviated CI in the table.

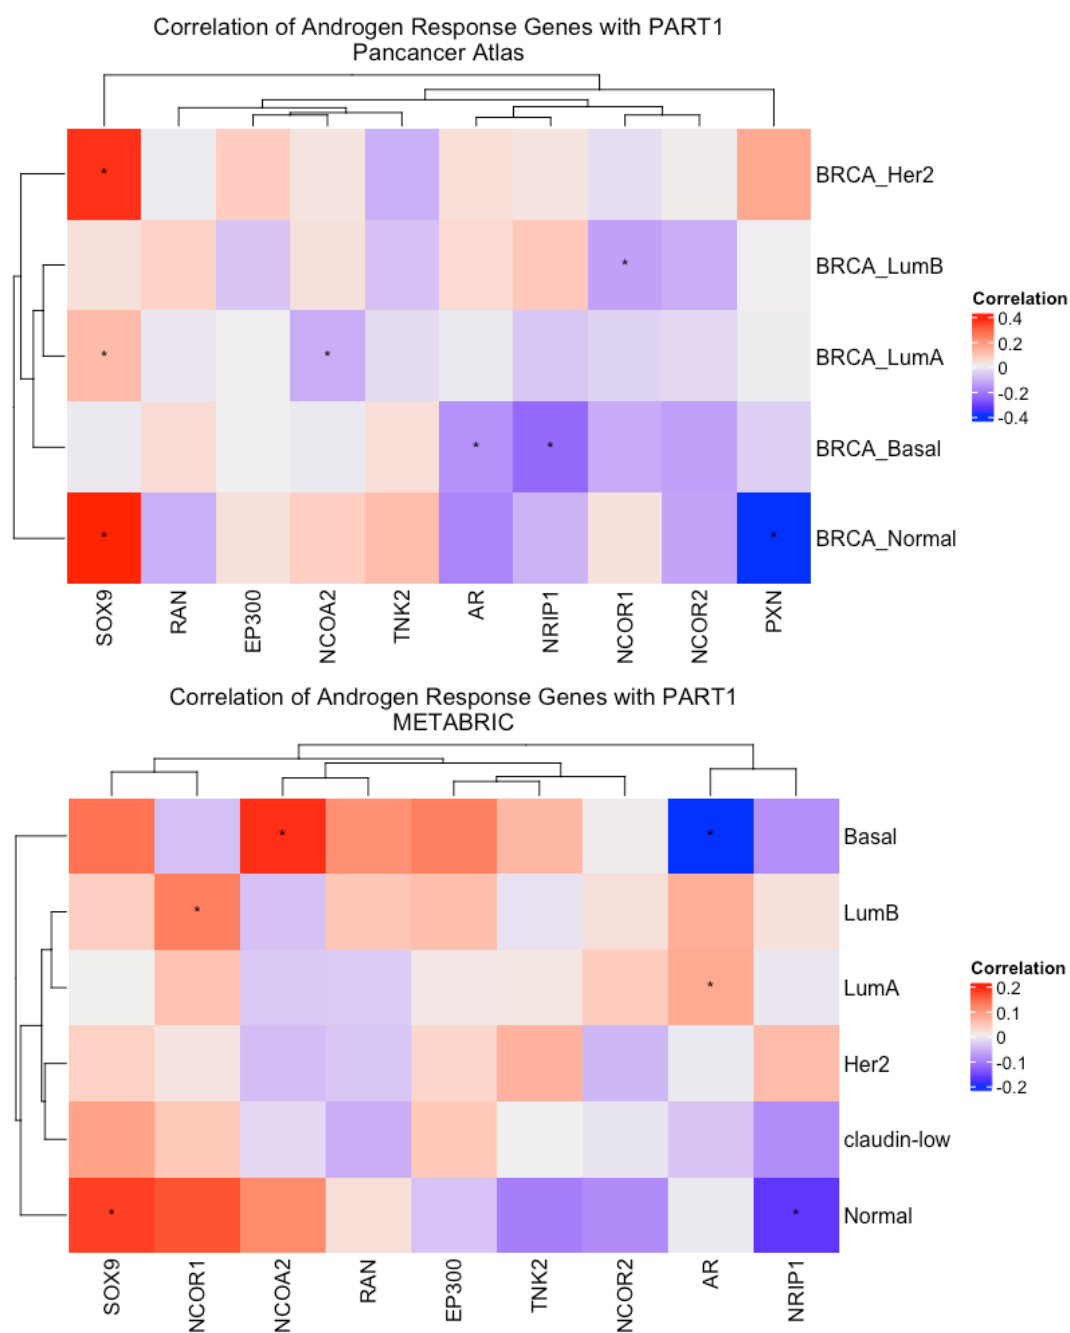

**Figure S1.** *PART1* is associated with androgen response genes. Spearman correlations of *PART1* expression with the expression of androgen response genes in breast cancer patient tumors in two datasets: (A) TCGA PanCancer Atlas and (B) METABRIC. The correlation was calculated with the `cor.test()` function in Rv4.2. \* indicates a *p* value of < 0.05.

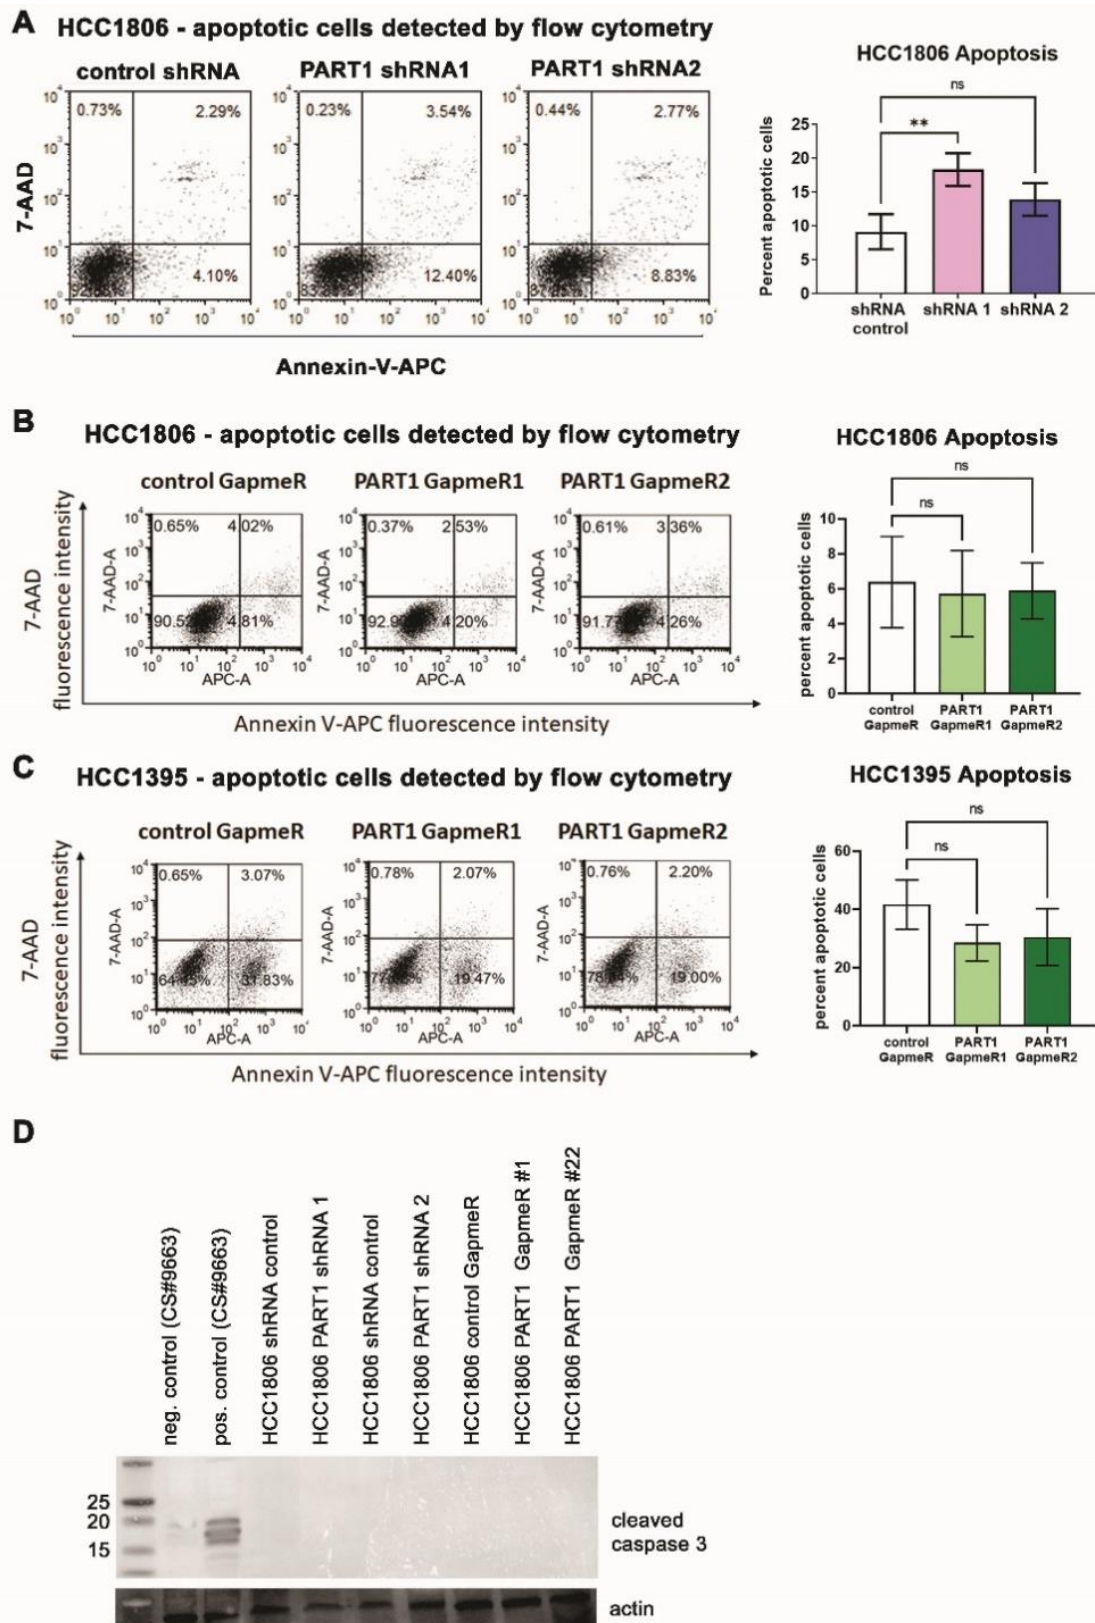

**Figure S2.** *PART1* knockdown induces minimal effects on apoptosis. (A, B and C) Representative flow cytometry dot plots of HCC1806 scramble control shRNA clone or HCC1806 *PART1* shRNA1 or 2 clones (A,  $n = 3$ ), HCC1806 cells treated with negative control GapmeRs or *PART1* GapmeR#1 or #2 (B,  $n = 3$ ), or HCC1395 cells treated with negative control GapmeRs or *PART1* GapmeR#1 or #2 (C,  $n = 3$ ) stained with 7AAD and Annexin V-APC. The percentage of apoptotic cells (all annexin-V positive stained cells) was quantified (significance determined by one-way ANOVA, followed by a Dunnett's post-test for multiple comparisons). Error bars represent standard deviation. (D) Cleaved caspase 3 is detected via western blotting in control lysates but not in HCC1806 cells with *PART1* shRNAs or GapmeR treatment. \*\* indicates a  $p$  value of  $< 0.01$ , ns indicates a non-significant  $p$  value.

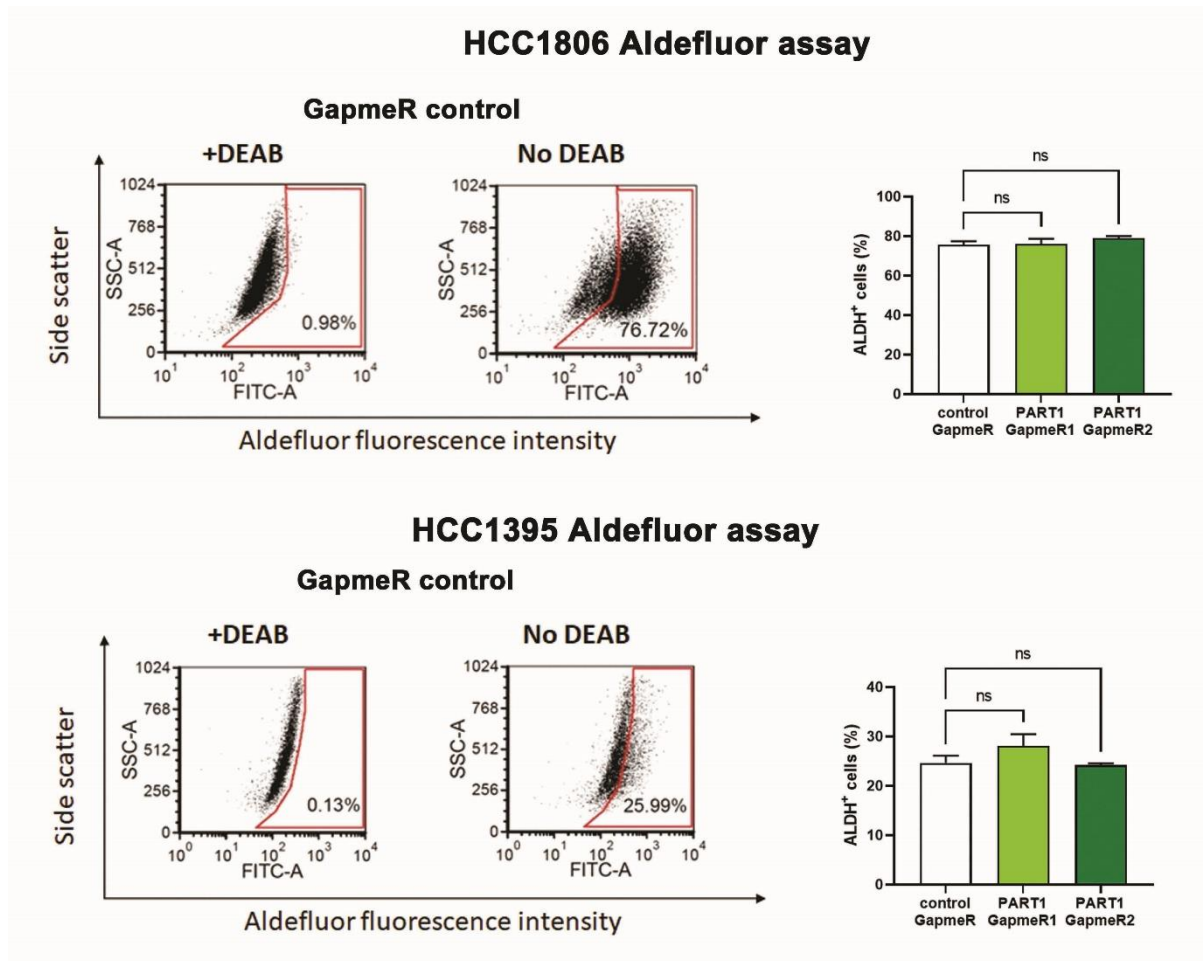

**Figure S3.** *PART1* GapmeR treatment does not change the percentage of Aldefluor<sup>high</sup> cells in HCC1806 and HCC1395 cells. Representative flow cytometry dot plots of HCC1806 and HCC1395 cells treated with control GapmeRs for 48 h and then assessed for the percentage of Aldefluor<sup>high</sup> cells. Debris and dead (positive 7AAD staining) were gated out of the analysis. The bar graphs show the average percentage of Aldefluor<sup>high</sup> cells. Significance was determined by one-way ANOVA, followed by a Dunnett's post-test for multiple comparisons (ns indicates a non-significant *p* value).

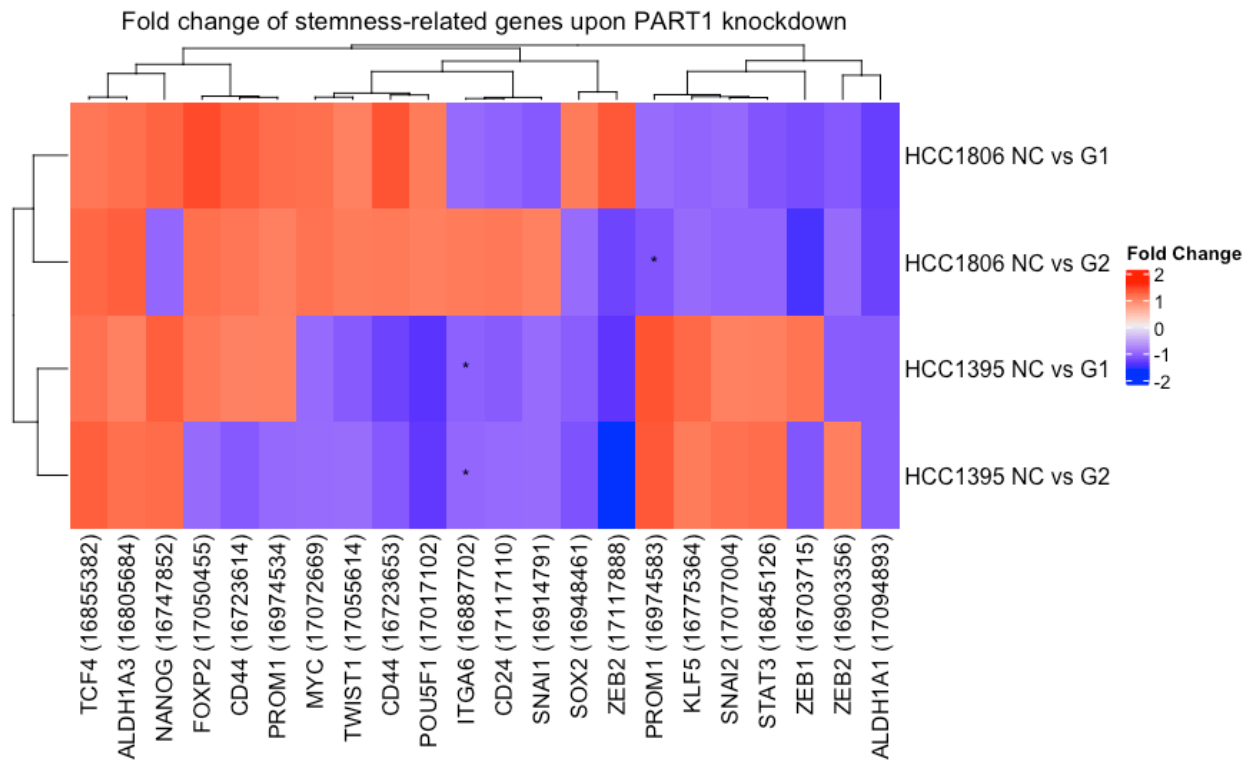

**Figure S4.** *PART1* knockdown has minimal effects on expression of CSC markers and stemness genes in HCC1806 and HCC1395 TNBC cells. Transcriptome changes induced by *PART1* knockdown (control (NC) versus GapmeR #1 (G1) and GapmeR #2 (G2)) were quantified in HCC1806 and HCC1395 cells using the Affymetrix Human Gene 2.0 ST microarray platform ( $n = 3$ ). The Affymetrix probe ID is shown in parentheses next to the gene name to differentiate multiple probes to the same transcript. The heatmap shows the log base 2-fold change ( $\log_2FC$ ) of stemness-related genes upon *PART1* knockdown. \* indicates a fold change  $p$  value of  $< 0.05$ .

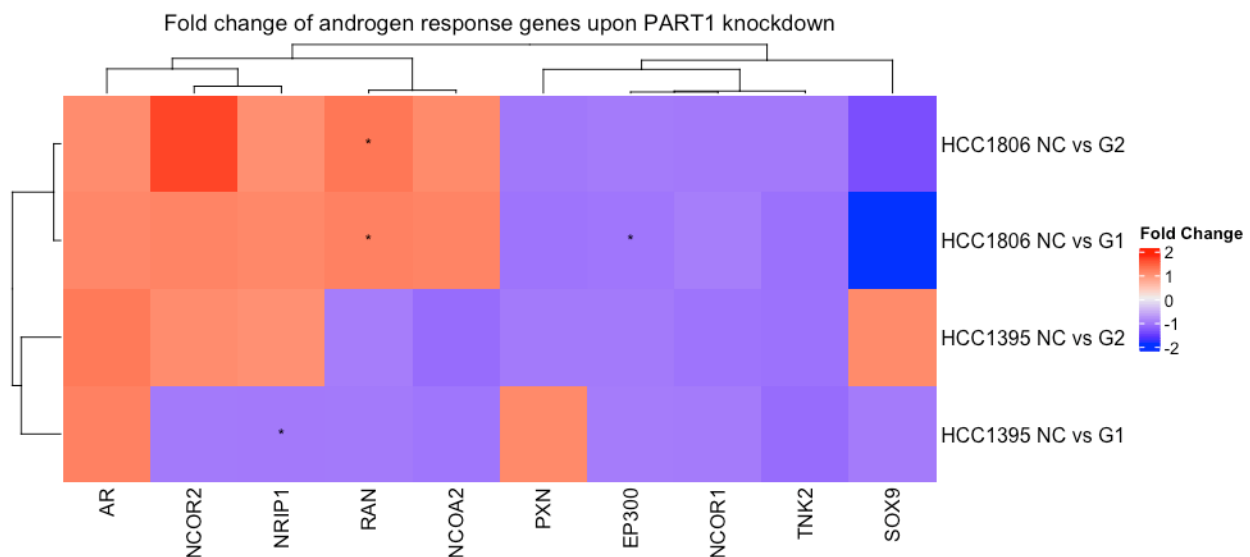

**Figure S5.** *PART1* knockdown induces minimal changes in gene expression of androgen signaling genes in HCC1806 and HCC1395 TNBC cells. Transcriptome changes induced by *PART1* knockdown (control (NC) versus GapmeR #1 (G1) and GapmeR #2 (G2)) were quantified in HCC1806 and HCC1395 cells using the Affymetrix Human Gene 2.0 ST microarray platform ( $n = 3$ , # represents the word number). The heatmap shows the log base 2-fold change ( $\log_2FC$ ) of androgen response genes upon *PART1* knockdown. \* indicates a fold change  $p$  value of  $< 0.05$ .

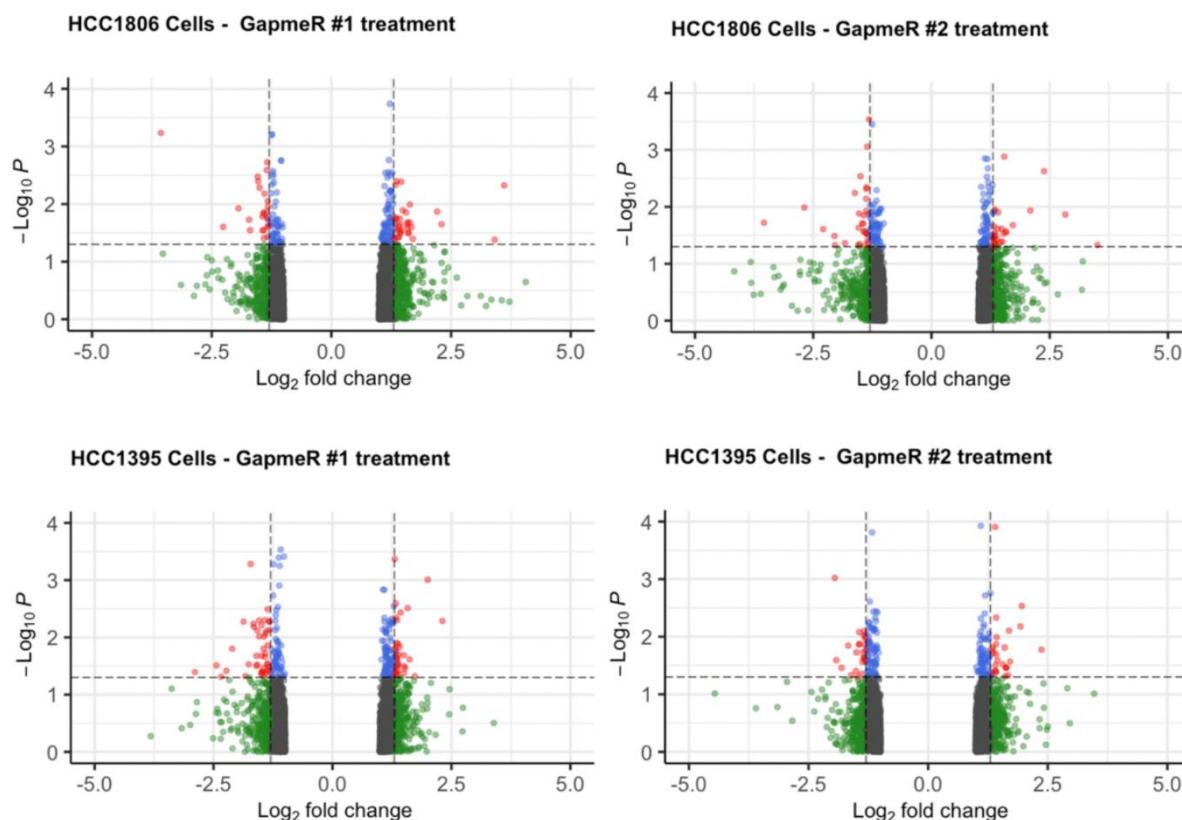

**Figure S6.** Volcano plots of miRNA fold change and  $p$  value from 4.0 miRNA gene chip array. The fold change thresholds are set at  $\pm 1.3$  and the  $p$  value threshold is set at 0.05. The # symbol specifies the GapmeR treatment used to knockdown *PART1* (where GapmeR #1 refers to an oligonucleotide with the following sequence: ATTCCAGATAAGTAGA; and GapmeR #2 refers to an oligonucleotide with the following sequence: GTGATTCCAGAATAAGT).

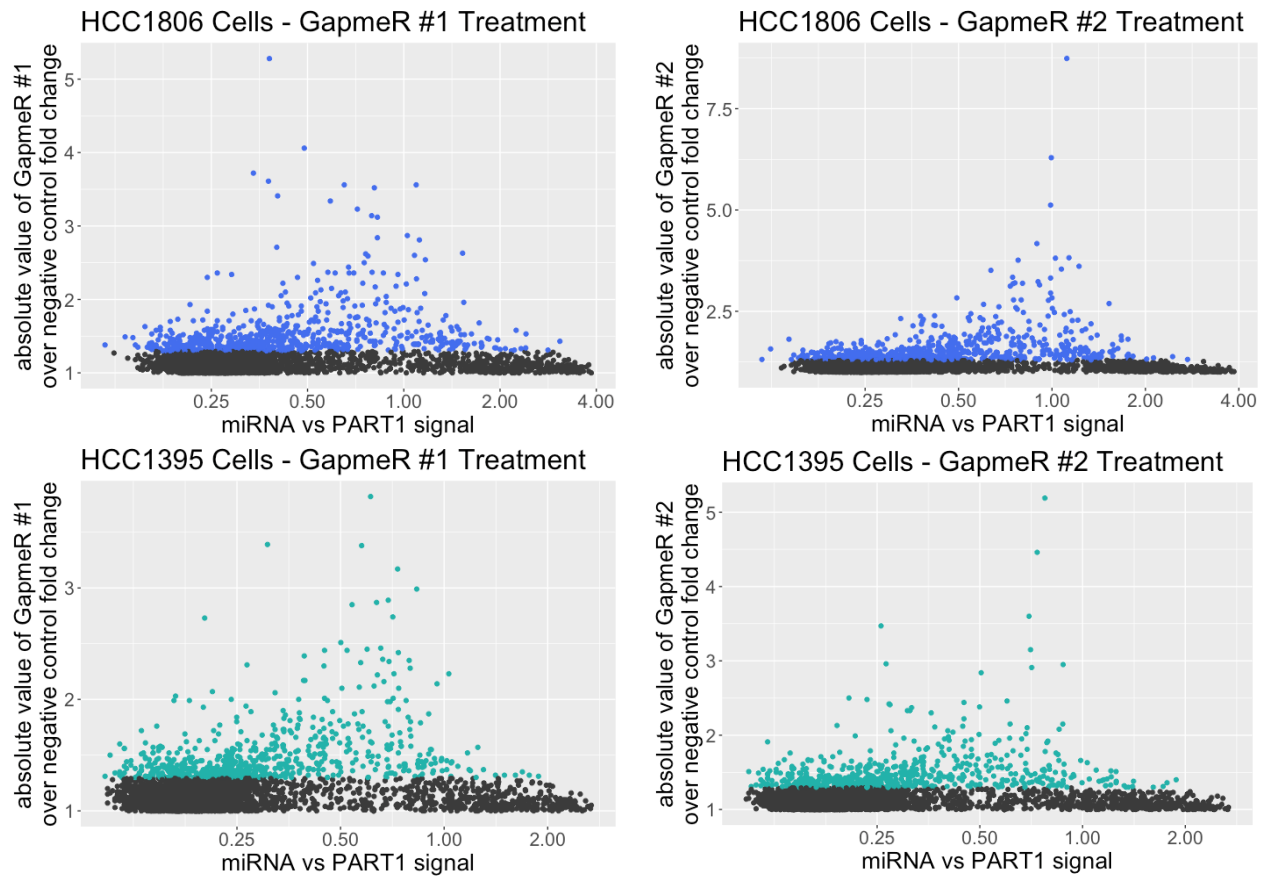

**Figure S7.** miRNA versus *PART1* abundance. The relative abundance of all the miRNAs in the 4.0 miRNA gene chip array to *PART1* (abundance extrapolated from GSE156114 and GSE163569) detected in the gene chips in the negative control samples was calculated for HCC1806 and HCC1395 cells (average of 3n). The # symbol specifies the GapmeR treatment used to knockdown *PART1* (where GapmeR #1 refers to an oligonucleotide with the following sequence: ATTCCAGATAAGTAGA; and GapmeR #2 refers to an oligonucleotide with the following sequence: GTGATTCCAGAATAAGT).

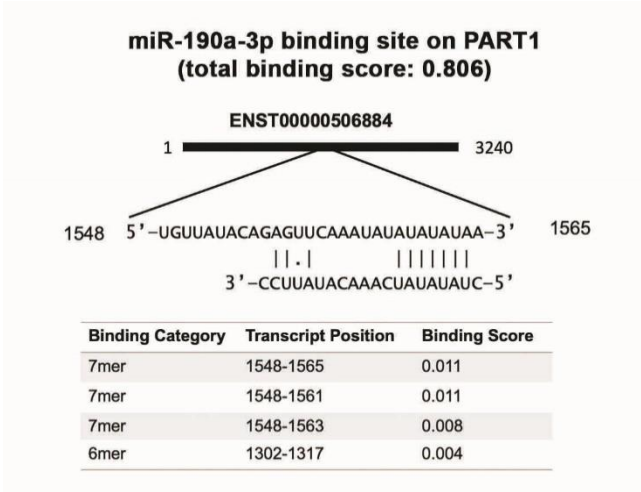

**Figure S8.** The LncBase v2 predicted *PART1* binding sites and affinity threshold score of *miR-190a-3p*.

Files S1–5. are provided separately attached as Excel Files.
