# Supplementary material for: LncRNA PART1 Promotes Proliferation and Migration, Is Associated with Cancer Stem Cells, and Alters the miRNA Landscape in Triple-Negative Breast Cancer
Source: Cancers (Basel). 2021 May 27;13(11):2644. doi: 10.3390/cancers13112644 (PMC8198907; doi:10.3390/cancers13112644)
Supplement: Supplementary file 1 [file cancers-13-02644-s001.zip › File S1.xlsx]

## Sheet: PanCancer Atlas
Subtypes	SNAI2.coef	SNAI2.pValue	TWIST1.coef	TWIST1.pValue	ZEB2.coef	ZEB2.pValue	TCF4.coef	TCF4.pValue	ZEB1.coef	ZEB1.pValue	FOXP2.coef	FOXP2.pValue	ALDH1A1.coef	ALDH1A1.pValue	SNAI1.coef	SNAI1.pValue	ALDH1A3.coef	ALDH1A3.pValue	CD24.coef	CD24.pValue	PROM1.coef	PROM1.pValue	KLF5.coef	KLF5.pValue	POU5F1.coef	POU5F1.pValue	SOX2.coef	SOX2.pValue	ITGA6.coef	ITGA6.pValue	CD44.coef	CD44.pValue	NANOG.coef	NANOG.pValue	MYC.coef	MYC.pValue	STAT3.coef	STAT3.pValue
BRCA_Basal	0.107295	0.162472	-0.0702819	0.361009	-0.30759	4.26891e-05	-0.101343	0.1872	-0.111149	0.147815	-0.0611649	0.42678	-0.203182	0.00769133	-0.197444	0.00963919	0.208587	0.00618503	0.25178	0.00089379	0.357844	1.54615e-06	0.282467	0.000181722	0.207056	0.00658244	-0.00757647	0.921654	0.231548	0.00230986	-0.0651939	0.396901	-0.0377443	0.624046	-0.119998	0.117977	-0.138274	0.0712971
BRCA_Her2	-0.0439687	0.702286	-0.00706888	0.951022	-0.138229	0.227471	-0.101405	0.377018	-0.0529976	0.644921	0.06797	0.554328	0.104389	0.363063	-0.265342	0.0188817	0.0217125	0.850339	0.141188	0.217578	-0.0520619	0.650778	0.156312	0.171738	-0.177001	0.121078	0.110218	0.336737	0.115366	0.314514	0.0224459	0.845345	-0.22291	0.0498022	-0.290659	0.00983502	-0.281883	0.0124105
BRCA_LumA	0.0268993	0.548849	-0.0454623	0.310808	-0.0434515	0.332717	-0.0681838	0.128245	-0.056997	0.203709	-0.0438151	0.328683	0.153734	0.000568846	-0.0798123	0.0748728	0.0343946	0.443309	-0.0542544	0.226354	0.13461	0.00258563	0.142388	0.00142774	0.0552965	0.217547	0.135936	0.00234148	0.231723	1.65222e-07	-0.0517592	0.248465	-0.0590574	0.18781	0.108281	0.0155262	-0.0721899	0.107254
BRCA_LumB	0.0320191	0.655117	0.0568875	0.427186	-0.00422011	0.953067	0.0223821	0.754897	0.00648958	0.927884	0.0323634	0.651652	0.138122	0.0529187	0.0276907	0.699306	-0.0495687	0.489109	0.121796	0.0882017	0.0513642	0.473487	0.172464	0.0153748	0.0813781	0.255616	0.326237	2.89055e-06	0.111959	0.117266	-0.175038	0.0138873	-0.0184561	0.796856	-0.116522	0.102972	-0.106819	0.135172
BRCA_Normal	-0.195109	0.254143	-0.602831	9.9851e-05	-0.565508	0.000325535	-0.493436	0.00222787	-0.500644	0.00187234	-0.176062	0.304354	-0.178378	0.297933	-0.524839	0.00101519	-0.0108108	0.950103	0.24556	0.148859	0.210811	0.217146	0.490862	0.00236844	0.126384	0.462649	-0.0853463	0.620663	0.208494	0.222358	-0.130245	0.448977	0.0351972	0.838515	0.180952	0.290901	-0.164736	0.336997
All Subtypes	0.0881852	0.00369548	-0.0185468	0.542245	-0.0802584	0.00826101	-0.12771	2.51698e-05	-0.16919	2.15232e-08	-0.0228906	0.451939	0.0209234	0.49175	0.111614	0.000234465	0.205931	7.94933e-12	0.166926	3.32708e-08	0.327816	1.60038e-28	0.338668	1.91506e-30	0.267932	3.03112e-19	0.0540948	0.0753009	0.314563	2.8072e-26	-0.00192224	0.949642	0.0523794	0.0850433	0.125146	3.65922e-05	-0.0876758	0.00389908

## Sheet: Metabric
Subtypes	SNAI2.coef	SNAI2.pValue	TWIST1.coef	TWIST1.pValue	ZEB2.coef	ZEB2.pValue	TCF4.coef	TCF4.pValue	ZEB1.coef	ZEB1.pValue	FOXP2.coef	FOXP2.pValue	ALDH1A1.coef	ALDH1A1.pValue	SNAI1.coef	SNAI1.pValue	ALDH1A3.coef	ALDH1A3.pValue	CD24.coef	CD24.pValue	PROM1.coef	PROM1.pValue	KLF5.coef	KLF5.pValue	POU5F1.coef	POU5F1.pValue	SOX2.coef	SOX2.pValue	ITGA6.coef	ITGA6.pValue	CD44.coef	CD44.pValue	NANOG.coef	NANOG.pValue	MYC.coef	MYC.pValue	STAT3.coef	STAT3.pValue
Basal	0.100484	0.157905	-0.0825247	0.246538	-0.0540719	0.448135	0.0490171	0.49175	0.108317	0.127796	0.00614588	0.931345	-0.111342	0.117429	-0.109042	0.12525	0.161862	0.0223687	0.097617	0.170169	0.127279	0.0732178	0.115818	0.10331	0.0379702	0.594412	-0.0498234	0.484645	0.205631	0.00357157	0.182473	0.00989216	-0.0839409	0.238496	0.0687452	0.334643	-0.0126633	0.8591
claudin-low	0.0736364	0.30131	0.0905056	0.20362	-0.184019	0.00927345	0.00380159	0.957501	-0.115867	0.103164	-0.139774	0.048952	-0.0555368	0.435916	-0.00688595	0.923102	0.0605741	0.395381	0.162309	0.021996	0.192573	0.00642969	0.107414	0.13102	0.0372605	0.601326	0.077393	0.277251	0.164131	0.0205308	-0.0467078	0.512403	0.0133166	0.851913	0.068963	0.333111	0.0838748	0.238867
Her2	-0.147866	0.0283234	-0.0607022	0.370222	-0.0704913	0.297925	-0.0686978	0.310417	-0.135562	0.0445867	0.0406541	0.548632	0.0545838	0.420475	-0.0838011	0.21569	-0.0237052	0.7266	0.0280684	0.678851	-0.00291103	0.965756	0.020349	0.764073	-0.00784614	0.907878	-0.000304289	0.996419	0.0571353	0.399052	-0.0352558	0.602986	-0.028238	0.677019	-0.112135	0.0971176	-0.0974006	0.149901
LumA	-0.152054	6.94926e-05	-0.168986	9.54912e-06	-0.0980983	0.0105376	-0.124718	0.0011276	-0.0588987	0.125211	-0.0539059	0.160589	-0.113573	0.00304078	-0.0904349	0.0184229	-0.0531829	0.166283	-0.124434	0.00115769	-0.0567771	0.139423	0.00887181	0.817504	0.0450161	0.24142	0.0400012	0.297953	0.181714	1.87865e-06	0.0330682	0.38961	-0.0437241	0.255207	-0.0592589	0.122914	-0.0715959	0.0622411
LumB	-0.074569	0.109833	-0.0659799	0.157261	-0.110344	0.0177879	-0.112899	0.0152987	-0.0515093	0.269731	-0.163039	0.000440347	-0.109891	0.0182643	-0.0143249	0.759034	-0.030122	0.518839	-0.11219	0.0159574	-0.134908	0.00370765	-0.0777674	0.0953691	0.00697879	0.88121	-0.125074	0.0071726	0.0712643	0.126538	0.0271624	0.560752	-0.0324971	0.48641	-0.0308286	0.509076	0.104959	0.0242172
NC	-0.257143	0.622787	-0.142857	0.787172	-0.0285714	0.957155	0.142857	0.787172	-0.314286	0.544093	0.0285714	0.957155	-0.314286	0.544093	-0.257143	0.622787	-0.0857143	0.871743	-0.657143	0.156175	0.0285714	0.957155	0.771429	0.0723965	0.657143	0.156175	0.257143	0.622787	0.371429	0.468478	-0.142857	0.787172	0.428571	0.396501	-0.257143	0.622787	-0.257143	0.622787
Normal	-0.0455075	0.59341	-0.0188669	0.824895	-0.057648	0.498692	-0.129226	0.128085	-0.049811	0.558917	-0.0174543	0.837818	0.0703791	0.408636	0.12042	0.156421	0.14191	0.0944201	-0.00629773	0.941131	0.245387	0.00347514	0.0815443	0.338168	0.0112156	0.895365	-0.129186	0.128202	0.261805	0.00178026	-0.0971705	0.253398	-0.0484551	0.56968	0.00529838	0.95046	0.0297775	0.726901
All Subtypes	-0.164736	0.336997	-0.0455075	0.59341	-0.0188669	0.824895	-0.057648	0.498692	-0.129226	0.128085	-0.049811	0.558917	-0.0174543	0.837818	0.0703791	0.408636	0.12042	0.156421	0.14191	0.0944201	-0.00629773	0.941131	0.245387	0.00347514	0.0815443	0.338168	0.0112156	0.895365	-0.129186	0.128202	0.261805	0.00178026	-0.0971705	0.253398	-0.0484551	0.56968	0.00529838	0.95046
