# Supplementary material for: LncRNA PART1 Promotes Proliferation and Migration, Is Associated with Cancer Stem Cells, and Alters the miRNA Landscape in Triple-Negative Breast Cancer
Source: Cancers (Basel). 2021 May 27;13(11):2644. doi: 10.3390/cancers13112644 (PMC8198907; doi:10.3390/cancers13112644)
Supplement: Supplementary file 1 [file cancers-13-02644-s001.zip › File S2.xlsx]

## Sheet: HCC1806
Transcript Cluster ID	Gene Symbol	Fold Change (linear) (1806 G1 vs. 1806 NG)	ANOVA p-value (1806 G1 vs. 1806 NG)	Fold Change (linear) (1806 G2 vs. 1806 NG)	ANOVA p-value (1806 G2 vs. 1806 NG)	SUM
16994779	CDH10	-6.97	0.094284	-3.86	0.02341	-5.415
16959575	RNU6-1284P	-2.49	0.016274	-2.54	0.004086	-2.515
16791527	LOC728755	-2.47	0.025426	-2.52	0.007533	-2.495
17094233	KGFLP2	-1.63	0.163952	-3.31	0.017352	-2.47
16809457	MYO5A	-1.81	0.008537	-3.08	0.044457	-2.445
17081211	RNU6-1255P	-2.22	0.138049	-2.67	0.015338	-2.445
16983501	RP11-774D14.1	-2.49	0.022414	-2.12	0.026118	-2.305
17125616	RP11-314A15.2	-2.26	0.071329	-2.27	0.024999	-2.265
16673227	RNU6-171P	-2.53	0.000741	-1.97	0.008803	-2.25
16959531	STAG1	-2.85	0.112838	-1.6	0.004941	-2.225
16766862	RNU6-871P	-1.82	0.105364	-2.48	0.021598	-2.15
16688525	RNU6-1246P	-1.62	0.509707	-2.62	0.008099	-2.12
17019610	SUPT3H	-2.51	0.069833	-1.64	0.002492	-2.075
17005253	CDKAL1	-2.16	0.038697	-1.95	0.03387	-2.055
16983611	LINC01021	-2.27	0.082986	-1.83	0.047163	-2.05
16793692	KCNH5	-2.22	0.024218	-1.77	0.224032	-1.995
17122496	LINC00152	-1.84	0.020973	-2.14	0.057207	-1.99
17122646	LINC00152	-1.79	0.045563	-2.19	0.094387	-1.99
17048223	LOC102723899	-1.9	0.072141	-2.07	0.033037	-1.985
17013512	RP11-307P5.1	-1.47	0.018545	-2.47	0.042889	-1.97
16878438	MIR4263	-2.19	0.018425	-1.71	4.6e-05	-1.95
17072295	ZHX2	-2.32	0.015568	-1.57	0.002244	-1.945
16855906	NETO1	-1.93	0.087865	-1.92	0.047627	-1.925
16924141	BAGE2	-1.81	0.025454	-2.02	0.08944	-1.915
16746574	RP5-1154L15.1	-2.12	0.056813	-1.71	0.004505	-1.915
16927718	BMS1P20	-1.75	0.098798	-2.06	0.004006	-1.905
17122488	MIR4435-1HG	-1.93	0.00291	-1.78	0.108193	-1.855
17098305	NR6A1	-1.7	0.067624	-1.97	0.013458	-1.835
17074914	MSR1	-1.82	0.035515	-1.79	0.217539	-1.805
17122474	LINC00152	-1.44	0.041981	-2.17	0.039637	-1.805
16810011	MIR2116	-1.59	0.046402	-1.96	0.008128	-1.775
16684389	SNORD85	-1.78	0.030736	-1.76	0.014311	-1.77
17091993	RNU6-1073P	-1.89	0.025544	-1.63	0.027339	-1.76
16865018	MIR1323	-2.27	0.035423	-1.2	0.858744	-1.735
16705287	LOC101928913	-1.88	0.009069	-1.59	0.0241	-1.735
16722295	RNA5SP332	-1.73	0.025518	-1.73	0.01878	-1.73
17125760	PPP1R12BP1	-1.93	0.037023	-1.53	0.032823	-1.73
17122494	LINC00152	-1.55	0.043871	-1.91	0.029889	-1.73
17119354	MIR1224	-2.31	0.032233	-1.11	0.971002	-1.71
17045230	AC006960.7	-1.77	0.017427	-1.64	0.016442	-1.705
16796664	RP11-638I2.4	-1.43	0.16713	-1.98	0.033957	-1.705
16815756	PMM2	-1.21	0.132533	-2.2	0.038772	-1.705
17023350	RNU6-200P	-1.86	0.022755	-1.51	0.109354	-1.685
16774319	DGKH	-1.41	0.019515	-1.93	0.015866	-1.67
16794326	MED6	-1.35	0.039395	-1.98	0.040991	-1.665
16868760	RNU7-140P	-1.39	0.406643	-1.9	0.01401	-1.645
16876726	RNU6-649P	-1.6	0.029783	-1.68	0.01882	-1.64
16855093	SMAD2	-1.24	0.006582	-2.04	0.029952	-1.64
16950392	AC023481.1	-1.93	0.009359	-1.34	0.030829	-1.635
17121818	USP32	-2.06	0.048578	-1.2	0.027564	-1.63
17114241	HS6ST2	-1.73	0.043123	-1.52	0.005423	-1.625
17119110	MIR4526	-2.03	0.010893	-1.21	0.149728	-1.62
16774043	RNU6-71P	-1.97	0.047589	-1.24	0.073993	-1.605
16742690	RNU6-311P	-1.73	0.004613	-1.48	0.554173	-1.605
17094074	RNU7-124P	-1.8	0.043522	-1.4	0.434039	-1.6
17013769	RNU6-302P	-1.98	0.016565	-1.19	0.207393	-1.585
17039199	DDR1-AS1	-1.11	0.54589	-2.06	0.001566	-1.585
16978728	TBCK	-1.67	0.019082	-1.49	0.024417	-1.58
16979336	LOC100507306	-1.64	0.025898	-1.52	0.220924	-1.58
16781587	EDDM3B	-1.83	0.001777	-1.32	0.099331	-1.575
17124146	MEI4	-1.61	0.036884	-1.53	0.03134	-1.57
16921461	LOC101930100	-1.69	0.029123	-1.45	0.018542	-1.57
16854792	LINC00669	-1.63	0.035637	-1.51	0.025328	-1.57
17110322	EFHC2	-1.74	0.037984	-1.4	0.123783	-1.57
17024219	MIR3145	-1.47	0.041981	-1.67	0.003293	-1.57
17115014	GABRA3	-1.72	0.012255	-1.41	0.006737	-1.565
16678994	RNU6-968P	-1.73	0.042733	-1.4	0.321416	-1.565
16974779	GPR125	-1.27	0.0454	-1.86	0.044032	-1.565
17114952	RNU6-383P	-1.62	0.029407	-1.5	0.034991	-1.56
16754536	SYT1	-1.41	0.001378	-1.71	0.002211	-1.56
16964904	RNA5SP152	-1.81	0.033486	-1.3	0.188948	-1.555
16660527	ZBTB40	-1.3	0.034843	-1.81	0.044969	-1.555
16732520	TBCEL	-1.47	0.041153	-1.64	0.035395	-1.555
17085991	RNU6-1228P	-1.99	0.036049	-1.11	0.635405	-1.55
16907952	AC107218.3	-1.83	0.031731	-1.25	0.516364	-1.54
16967360	LOC101929979	-1.61	0.026721	-1.46	0.034411	-1.535
17002527	RNU6-168P	-1.72	0.005064	-1.34	0.176912	-1.53
16953241	MAP4	-1.33	0.001388	-1.73	0.049285	-1.53
16741897	RNU6-672P	-1.44	0.14842	-1.62	0.02905	-1.53
16735223	OR2D2	-1.63	0.021307	-1.43	0.015764	-1.53
16848453	SLC39A11	-1.89	0.036197	-1.17	0.377063	-1.53
16701145	RP11-261C10.1	-1.41	0.16347	-1.62	0.040978	-1.515
17071289	KCNS2	-1.61	0.044198	-1.4	0.425107	-1.505
16925466	HLCS	-1.27	0.035985	-1.73	0.010054	-1.5
16855340	SNORA37	-1.61	0.004693	-1.36	0.077385	-1.485
16794539	RP3-414A15.11	-1.35	0.018232	-1.62	0.041632	-1.485
16848095	MIR635	-1.76	0.022414	-1.19	0.508441	-1.475
16909939	LOC151174	-1.6	0.037948	-1.34	0.226808	-1.47
17025498	DNM1L	-1.8	0.01649	-1.13	0.560577	-1.465
16987844	MAN2A1	-1.22	0.040984	-1.71	0.033515	-1.465
16852079	RNU6-706P	-1.32	0.350838	-1.6	0.033616	-1.46
16784033	RP11-286O18.1	-1.65	0.038301	-1.26	0.259997	-1.455
16971019	GAB1	-1.66	0.011654	-1.23	0.161855	-1.445
17113335	SNORD96B	-1.68	0.023294	-1.21	0.491403	-1.445
16996119	ARL15	-1.62	0.011372	-1.26	0.001946	-1.44
16970740	RP11-314N14.1	-1.73	0.041193	-1.15	0.397621	-1.44
17065958	TUSC3	-1.72	0.045631	-1.16	0.065695	-1.44
16897973	PUS10	-1.16	0.01683	-1.71	0.037618	-1.435
16738094	RP11-750H9.7	-1.67	0.021182	-1.18	0.143522	-1.425
17105665	LINC00630	-1.67	0.016768	-1.18	0.112024	-1.425
16882939	LOC101926959	-1.23	0.002624	-1.61	0.022084	-1.42
16773224	C1QTNF9	-1.78	0.004434	-1.04	0.326701	-1.41
16887055	RNA5SP110	-1.66	0.033349	-1.16	0.456261	-1.41
17056319	AC007285.7	-1.68	0.035486	-1.14	0.386566	-1.41
17111549	PAGE3	-1.14	0.025459	-1.67	0.009528	-1.405
16793488	L3HYPDH	-1.17	0.028845	-1.61	0.000413	-1.39
16775144	RNA5SP30	-1.72	0.027217	-1.02	0.604032	-1.37
17065938	RNA5SP255	-1.69	0.032419	-1.04	0.770934	-1.365
16698872	RP1-272L16.1	-1.69	0.036238	-1	0.583043	-1.345
16880251	AC012358.8	-1.67	0.002023	-1.02	0.398965	-1.345
16957612	DRD3	-1.64	0.028695	-1	0.807182	-1.32
16871178	RN7SKP22	-2.15	0.042258	1.08	0.904389	-0.535
16875217	MIR371B	-1.91	0.006481	1.02	0.954915	-0.445
16835123	RNU6ATAC3P	-1.9	0.031246	1.07	0.531384	-0.415
16732755	GRAMD1B	-1.83	0.034595	1.06	0.630888	-0.385
16788729	MIR494	-1.76	0.036619	1.02	0.344825	-0.37
16789019	TECPR2	-1.73	0.026279	1.01	0.533797	-0.36
16812053	TBC1D2B	-1.72	0.02309	1	0.275219	-0.36
16863593	C5AR2	-1.72	0.006093	1.02	0.449326	-0.35
16807302	RP11-37C7.2	-1.71	0.000349	1.04	0.666466	-0.335
16956386	ROBO1	-1.71	0.042087	1.09	0.648516	-0.31
16745651	OR8B8	-1.61	0.022369	1.14	0.553299	-0.235
16727074	OVOL1	1.69	0.035928	-1.17	0.615664	0.26
16994364	LOC389273	1.66	0.002645	-1.07	0.374379	0.295
16994803	RP11-549K20.1	-1.16	0.0161	1.77	0.005598	0.305
16924473	AP000477.2	1.79	0.012131	-1.1	0.977711	0.345
17120392	ANKRD30BP3	1.84	0.035794	-1.01	0.597302	0.415
16918607	MIR499B	-1.07	0.604918	1.92	0.003493	0.425
16806101	RNU6-741P	-1.02	0.393055	1.88	0.000295	0.43
17055140	COL28A1	1.6	0.008893	1.01	0.588693	1.305
16794974	RP11-270M14.4	1.62	0.015861	1.02	0.90902	1.32
16666348	RP4-564M11.2	1.07	0.345346	1.62	0.006252	1.345
16949922	SDHAP2	1.62	0.028846	1.09	0.619268	1.355
17125176	VLDLR-AS1	1.68	0.041954	1.03	0.654498	1.355
17059087	RNU6-530P	1.7	0.027007	1.03	0.618061	1.365
16782008	TRAJ61	1.65	0.012497	1.1	0.648433	1.375
16876297	KIR3DL2	1.63	0.012987	1.12	0.32573	1.375
16881065	AC092431.2	1.64	0.026343	1.12	0.480049	1.38
16862375	CYP2B7P	1.71	0.041428	1.08	0.852914	1.395
17120778	LOC100506691	1.72	0.047575	1.12	0.466127	1.42
16833706	MIR4727	1.63	0.049171	1.22	0.106424	1.425
16994696	RP11-124N3.3	1.67	0.009358	1.18	0.228848	1.425
17005092	RNU6-1114P	1.05	0.357393	1.8	0.012676	1.425
16986939	RNU4-11P	1.62	0.022952	1.24	0.482607	1.43
17097130	RNU6-124P	1.61	0.03442	1.25	0.418057	1.43
16840195	INCA1	1.73	0.008239	1.14	0.236713	1.435
16880648	LOC100507006	1.66	0.007456	1.24	0.431357	1.45
17102422	RNU6-1087P	1.16	0.496785	1.74	0.006158	1.45
16972053	RP11-234O6.2	1.22	0.032215	1.69	0.010289	1.455
16797421	IGHD2-21	1.31	0.026413	1.63	0.015609	1.47
16974686	AC006160.5	1.68	0.003522	1.31	0.138331	1.495
16961747	RNU6-1120P	1.21	0.664638	1.81	0.002605	1.51
16993908	MIR4635	1.7	0.043434	1.36	0.165373	1.53
16969553	RNU6-551P	1.68	0.017093	1.39	0.116586	1.535
16757873	SIRT4	1.7	0.008163	1.39	0.010111	1.545
16974113	RN7SKP36	1.72	0.000368	1.38	0.000992	1.55
17008720	GNMT	1.74	0.037991	1.38	0.240991	1.56
16894824	OSR1	1.48	0.003893	1.64	0.001203	1.56
17019817	RP11-550C4.6	1.87	0.017225	1.26	0.013911	1.565
16663051	ZFP69B	1.64	0.01508	1.5	0.055869	1.57
16702543	RNU6ATAC39P	1.89	0.006297	1.26	0.145794	1.575
17125878	LOC644083	1.49	0.016819	1.69	0.04601	1.59
17125910	LOC644083	1.49	0.016819	1.69	0.04601	1.59
16882183	TCF7L1-IT1	1.69	0.018883	1.51	0.074322	1.6
16934896	RP5-1039K5.16	1.55	0.038614	1.67	0.003431	1.61
17008461	TREML5P	1.82	0.041789	1.41	0.264494	1.615
16844644	KRT33A	1.49	0.371248	1.76	0.044497	1.625
16677497	RP5-1111A8.3	1.72	0.037255	1.55	0.046463	1.635
16870802	ZNF708	1.76	0.000798	1.52	0.000412	1.64
16788725	MIR329-1	1.73	0.005543	1.58	0.038509	1.655
16879174	QPCT	1.83	0.008216	1.48	0.097956	1.655
16891575	ACSL3	1.57	0.033592	1.74	0.02158	1.655
16764285	TUBA1B	1.71	0.051804	1.62	0.042407	1.665
16934743	SSTR3	1.73	0.012185	1.64	0.075627	1.685
16734524	SNORA54	1.91	0.008877	1.49	0.044408	1.7
16776096	MIR4306	1.94	0.044141	1.5	0.260761	1.72
16812023	LOC645752	1.9	0.041185	1.54	0.080363	1.72
16764598	MIR1293	1.67	0.062782	1.79	0.039075	1.73
16991694	RNU4ATAC2P	1.7	0.026638	1.77	0.010138	1.735
17077267	RNU6ATAC32P	1.3	0.78189	2.17	0.032274	1.735
16734339	MIR4298	1.45	0.025717	2.09	0.005025	1.77
16863566	MIR3190	1.66	0.288469	1.9	0.013852	1.78
16706706	RNU6-441P	1.62	0.056048	1.97	0.025142	1.795
16798518	RP11-100M12.2	1.48	0.017375	2.13	0.01779	1.805
16766403	TMEM194A	1.73	0.067194	1.88	0.036529	1.805
16998515	LOC100133050	1.74	0.048194	1.87	0.053596	1.805
17056672	RNU6-1085P	1.88	0.00435	1.81	0.003635	1.845
16920473	SUMO1P1	2.6	0.023667	1.11	0.662827	1.855
16794153	CTD-2325P2.3	1.89	0.093989	1.83	0.031024	1.86
17060061	ASNS	2.17	0.081859	1.62	0.002209	1.895
16834630	RNU6-406P	2.54	0.024185	1.26	0.336698	1.9
16798688	ULK4P3	2.15	0.109212	1.66	0.026268	1.905
17118662	SNORD45C	2.3	0.050516	1.62	0.023822	1.96
16885575	CFC1B	1.68	0.081281	2.24	0.047787	1.96
16972420	MIR548T	2.25	0.048799	1.7	0.094869	1.975
16994209	RN7SKP79	1.91	0.167647	2.1	0.030793	2.005
16670141	GPR89A	2.02	0.030122	2.01	0.020566	2.015
16848894	MIR4738	2.74	0.027348	1.31	0.140546	2.025
16988085	RNU4ATAC13P	1.68	0.353589	2.38	0.032586	2.03
16828540	RNA5SP430	2.27	0.01215	1.94	0.284763	2.105
16945993	PPP2R3A	2.19	0.020928	2.22	0.017434	2.205
16669963	GPR89A	2.24	0.039019	2.23	0.02841	2.235

## Sheet: HCC1395
Transcript Cluster ID	Gene Symbol	Fold Change (linear) (1395 G1 vs. 1395 NG)	ANOVA p-value (1395 G1 vs. 1395 NG)	Fold Change (linear) (1395 G2 vs. 1395 NG)	ANOVA p-value (1395 G2 vs. 1395 NG)	Sum
16944559	ARGFX	-2.21	0.007607	-2.5	0.039033	-2.355
17046210	RNU6-1126P	-2.26	0.043404	-2.09	0.056696	-2.175
16774043	RNU6-71P	-2.1	0.210914	-1.97	0.2638	-2.035
16923666	KRTAP10-11	-1.8	0.053197	-2.18	0.015192	-1.99
16874683	KLK5	-1.9	0.038515	-2.02	0.061525	-1.96
16729838	RNU6-1135P	-1.73	0.251077	-2.16	0.033423	-1.945
16919341	RNU6-1018P	-2.03	0.115055	-1.83	0.040604	-1.93
16705089	BICC1	-2.21	0.001753	-1.58	0.009853	-1.895
17102422	RNU6-1087P	-1.56	0.146676	-2.1	0.048801	-1.83
17058643	RNA5SP233	-1.82	0.174002	-1.81	0.011688	-1.815
17002612	SLIT3	-1.63	0.000134	-1.99	0.001382	-1.81
16981848	RP11-18D7.2	-1.71	0.005093	-1.9	0.00454	-1.805
16808563	RP11-109D20.2	-1.3	0.400679	-2.3	0.020618	-1.8
16887936	HOXD10	-1.81	0.065619	-1.76	0.019417	-1.785
17126016	MIR4469	-1.52	0.461653	-2.04	0.034834	-1.78
16777998	RNY1P4	-2.19	0.025523	-1.37	0.637125	-1.78
16736656	RNA5SP335	-1.83	0.03337	-1.7	0.042868	-1.765
17052611	TRBV4-2	-1.28	0.299083	-2.22	0.038447	-1.75
17047772	RNA5SP234	-1.8	0.170222	-1.69	0.035219	-1.745
16701608	OR2M7	-1.9	0.015099	-1.59	0.238936	-1.745
16853985	AP002414.1	-1.96	0.019502	-1.5	0.108753	-1.73
16990542	CTB-57H20.1	-1.74	0.048119	-1.68	0.207453	-1.71
16973942	RN7SKP275	-2.34	0.030921	-1.07	0.822313	-1.705
16870838	ZNF208	-1.74	0.007243	-1.65	0.003053	-1.695
16759726	RP11-598F7.3	-1.72	0.019233	-1.66	0.082043	-1.69
16693383	PGLYRP3	-1.37	0.094849	-2.01	0.000403	-1.69
17123750	SH3D19	-1.4	0.224857	-1.98	0.006992	-1.69
16931543	MIR4535	-1.6	0.053129	-1.76	0.016106	-1.68
17019610	SUPT3H	-2.08	0.00041	-1.2	0.055267	-1.64
16895974	LOC100129995	-1.83	0.033549	-1.45	0.54276	-1.64
16782080	TRAJ22	-1.64	0.136224	-1.64	0.026828	-1.64
16853019	RNA5SP460	-1.9	0.007639	-1.38	0.103612	-1.64
16805621	CTD-2054N24.1	-1.76	0.040446	-1.51	0.066793	-1.635
16840599	CLDN7	-2.05	0.04404	-1.22	0.292098	-1.635
16838266	RNU1-80P	-1.08	0.616202	-2.16	0.01098	-1.62
16976583	UGT2A1	-1.71	0.029876	-1.53	0.05063	-1.62
16761533	TAS2R42	-1.67	0.042151	-1.56	0.109294	-1.615
16931985	LOC101929372	-1.42	0.005008	-1.8	0.035608	-1.61
16985067	PART1	-1.56	0.045414	-1.65	0.029609	-1.605
16927702	IGLV6-57	-1.23	0.62289	-1.98	0.011497	-1.605
16980468	RNA5SP165	-1.76	0.013877	-1.43	0.048293	-1.595
17079705	RNU6ATAC41P	-1.49	0.058009	-1.68	0.039851	-1.585
16913848	RN7SKP100	-1.65	0.046901	-1.52	0.044655	-1.585
16874583	LRRC4B	-1.83	0.006867	-1.34	0.112386	-1.585
16930199	APOBEC3G	-1.24	0.126088	-1.92	0.013106	-1.58
16950196	CHL1-AS1	-1.66	0.007639	-1.5	0.021501	-1.58
17059911	PON3	-1.55	0.013584	-1.6	0.032527	-1.575
16670681	ANXA9	-1.32	0.241849	-1.81	0.049765	-1.565
16796541	RP11-907D1.1	-1.64	0.010117	-1.49	0.185243	-1.565
16823744	RNU7-63P	-2.03	0.031725	-1.1	0.469636	-1.565
17083249	LOC101929302	-1.93	0.008459	-1.19	0.205826	-1.56
16684391	NKAIN1	-1.34	0.038021	-1.77	0.036456	-1.555
16882812	GGT8P	-1.36	0.094916	-1.74	0.02213	-1.55
16677929	RNU6-1008P	-1.26	0.186314	-1.81	0.038994	-1.535
16772316	RP11-575F12.2	-1.7	0.008326	-1.37	0.07375	-1.535
16924383	LOC101927797	-1.39	0.442278	-1.68	0.046584	-1.535
16903186	LRP1B	-1.89	0.028171	-1.16	0.090195	-1.525
16775811	GPC6	-1.69	0.001636	-1.35	0.01795	-1.52
16686745	CYP4A11	-1.77	0.031973	-1.27	0.102835	-1.52
16782010	TRAJ59	-1.64	0.016098	-1.39	0.008641	-1.515
16874293	PTH2	-1.35	0.110364	-1.67	0.002787	-1.51
16843215	AC090616.2	-1.25	0.054067	-1.76	0.002915	-1.505
17051089	FSCN3	-1.69	0.030307	-1.32	0.12833	-1.505
17059355	SEMA3D	-1.4	0.031837	-1.6	0.006352	-1.5
16779193	RNA5SP28	-1.27	0.114734	-1.71	0.03496	-1.49
16906256	LOC101927217	-1.34	0.062624	-1.62	0.001296	-1.48
17065171	MIR596	-1.34	0.066539	-1.61	0.032902	-1.475
17125996	MIR4747	-1.31	0.420078	-1.64	0.03842	-1.475
16667293	LOC100505940	-1.68	0.002294	-1.27	0.005943	-1.475
16960766	KCNAB1-AS2	-1.33	0.170889	-1.6	0.035425	-1.465
16903771	CACNB4	-1.61	0.001743	-1.32	0.034088	-1.465
17056954	AC004837.4	-1.32	0.025713	-1.6	0.030607	-1.46
17113062	TEX13A	-1.19	0.067817	-1.73	0.009054	-1.46
17018601	C6orf222	-1.61	0.037518	-1.3	0.100057	-1.455
17114470	CT45A6	-1.16	0.346504	-1.73	0.032147	-1.445
17061586	RNA5SP236	-1.67	0.049306	-1.22	0.712993	-1.445
16867899	FLJ25758	-1.28	0.459653	-1.6	0.023583	-1.44
16691574	RNA5SP56	-1.15	0.204875	-1.72	0.006655	-1.435
16818239	ITGAM	-1.23	0.112089	-1.62	0.03311	-1.425
16874202	CGB7	-1.81	0.031749	-1.04	0.588655	-1.425
17105645	GPRASP1	-1.69	0.02803	-1.15	0.643097	-1.42
16743184	TRIM49	-1.23	0.160193	-1.6	0.026304	-1.415
16910589	DEFB132	-1.64	0.003881	-1.19	0.222246	-1.415
17052295	RAB19	-1.13	0.296721	-1.67	0.04336	-1.4
17068349	C8orf4	-1.64	0.001002	-1.15	0.072559	-1.395
17095638	MIR4290	-1.63	0.039993	-1.14	0.834038	-1.385
17118784	MIR3159	-1.07	0.110959	-1.69	0.008424	-1.38
16768618	TMCC3	-1.02	0.324438	-1.73	0.01281	-1.375
17125970	MIR4632	-1.73	0.041968	-1.02	0.959343	-1.375
17103864	LOC401589	-1.12	0.387797	-1.62	0.028899	-1.37
17111020	LOC401589	-1.12	0.387797	-1.62	0.028899	-1.37
17044692	PRR15	-1.63	0.045186	-1.1	0.497778	-1.365
16999970	MIR1289-2	-1.02	0.727871	-1.7	0.012403	-1.36
16857748	CLEC4M	-1.1	0.704627	-1.6	0.047788	-1.35
17095194	RASEF	-1.06	0.246071	-1.64	0.033767	-1.35
17070703	RNA5SP273	-1.62	0.00116	-1.08	0.662609	-1.35
16679438	RNA5SP81	-1.07	0.378998	-1.62	0.011064	-1.345
17071257	RNU6-703P	-2.21	0.003618	1.31	0.67232	-0.45
16968695	RNU1-36P	-1.78	0.007913	1.02	0.810114	-0.38
17079513	RNU6-748P	-1.89	0.026037	1.22	0.490052	-0.335
17001757	ZNF300P1	1.2	0.158478	-1.74	0.022867	-0.27
17118984	MIR4716	1.36	0.840576	-1.89	0.0177	-0.265
17101285	RNU6-114P	-1.6	0.019797	1.09	0.959088	-0.255
16682671	AKR7L	-1.08	0.912279	1.61	0.022862	0.265
16852568	RNU6-742P	-1.08	0.127783	1.63	0.002806	0.275
16980879	RP11-27G13.1	1.6	0.039036	-1.01	0.963644	0.295
17101445	RNU6-800P	1.62	0.034275	-1.02	0.7803	0.3
16761523	TAS2R43	-1.11	0.424158	1.78	0.011213	0.335
17072632	RNU6-869P	1.64	0.033707	1.03	0.461743	1.335
16960705	PLCH1	1.08	0.647155	1.64	0.005628	1.36
17068064	LETM2	1.63	0.019202	1.09	0.616174	1.36
16714373	LOC102724719	1.1	0.251431	1.65	0.014428	1.375
17011338	RNU6-527P	1.68	0.017996	1.08	0.363036	1.38
17117853	FLJ38379	1.05	0.782418	1.72	0.029969	1.385
16818666	RNA5SP425	1.65	0.044923	1.14	0.189091	1.395
16761541	PRB4	1.04	0.720167	1.76	0.016282	1.4
16897662	RNU6-433P	1.03	0.3138	1.78	0.000112	1.405
16675376	MIR1278	1.21	0.202238	1.61	0.033812	1.41
16900286	LINC00342	1.04	0.319787	1.79	0.005564	1.415
17013247	RP3-468K18.5	1.23	0.244425	1.61	0.023219	1.42
16990312	PCDHB13	1.67	0.044747	1.19	0.547753	1.43
16763465	RACGAP1P	1.24	0.383818	1.64	0.03654	1.44
17056281	AC007255.8	1.21	0.193864	1.67	0.014523	1.44
16758872	RNU6-927P	1.81	0.024827	1.07	0.938056	1.44
16784272	RP11-589M4.1	1.25	0.270679	1.64	0.027963	1.445
16938475	CMC1	1.25	0.07256	1.64	0.005344	1.445
16865054	MIR520C	1.09	0.279456	1.8	0.00454	1.445
17121330	RPL29P30	1.85	0.012128	1.07	0.64959	1.46
16778637	SMIM2-IT1	1.27	0.048166	1.66	0.017626	1.465
16792194	RNU6-1277P	1.21	0.396156	1.72	0.03452	1.465
17005871	HIST1H2BN	1.04	0.543722	1.89	0.026131	1.465
16698405	RNA5SP74	1.66	0.026782	1.27	0.311959	1.465
16821015	RP11-53L24.1	1.19	0.456335	1.75	0.005223	1.47
17100685	MT-TT	1.31	0.086808	1.63	0.048231	1.47
17122940	CECR7	1.34	0.009601	1.6	0.008451	1.47
16929507	RNU7-167P	1.79	0.046014	1.16	0.368352	1.475
16869942	CYP4F2	1.65	0.01297	1.31	0.145721	1.48
17085829	GDA	1.33	0.033049	1.64	0.038632	1.485
16916559	SNORD119	1.23	0.006302	1.76	0.000187	1.495
16738+78:89657	GLYATL2	1.28	0.409151	1.71	0.046846	1.495
16796664	RP11-638I2.4	1.64	0.044509	1.35	0.095252	1.495
16995455	RNU6-1190P	1.65	0.00337	1.34	0.283793	1.495
16703758	RNU7-22P	1.34	0.107244	1.67	0.025261	1.505
16710120	MIR3941	1.37	0.140668	1.66	5.3e-05	1.515
16909524	SNORD82	1.27	0.798113	1.76	0.043723	1.515
16667492	LOC729987	1.9	0.012905	1.14	0.545961	1.52
17117027	NLGN4Y-AS1	1.75	0.037471	1.29	0.119652	1.52
16899478	LOC101927967	1.35	0.651767	1.7	0.04872	1.525
16853001	RP11-41O4.1	1.68	0.003299	1.37	0.089703	1.525
17118760	SNORD98	1.6	0.029577	1.45	0.421407	1.525
16956196	FOXP1-IT1	1.91	0.005787	1.15	0.142394	1.53
16854702	INO80C	1.62	0.003981	1.45	0.000126	1.535
17124448	DPY19L2P3	1.34	0.020502	1.75	0.026618	1.545
16909411	RNY4P19	1.43	0.04507	1.67	0.014356	1.55
16882183	TCF7L1-IT1	1.31	0.04628	1.8	0.02404	1.555
16949909	MIR570	1.52	0.023738	1.6	0.015306	1.56
16766588	MIR616	1.63	0.018058	1.49	0.044536	1.56
17064686	AC073236.3	1.8	0.007278	1.32	0.159168	1.56
16769941	RNU4-32P	1.66	0.011264	1.47	0.004418	1.565
16899084	RNA5SP97	1.69	0.015495	1.46	0.001887	1.575
17092875	IFNE	1.65	0.03788	1.5	0.198158	1.575
17012125	RNU6-194P	1.29	0.322159	1.86	0.014856	1.575
16736682	NAV2-AS1	1.45	0.017043	1.71	0.017409	1.58
17125288	AQP7P3	1.69	0.00729	1.48	0.114595	1.585
16991760	MIR3142	1.55	0.039314	1.63	0.024984	1.59
16836269	RNU6-1249P	1.58	0.000273	1.6	0.00595	1.59
16900856	RNU7-96P	1.59	0.032512	1.62	0.023435	1.605
17072723	RNU1-106P	1.63	0.017617	1.58	0.116372	1.605
17119698	RNU1-106P	1.63	0.017617	1.58	0.116372	1.605
16686253	ERI3-IT1	1.47	0.018428	1.75	0.017366	1.61
16761526	TAS2R30	1.56	0.018432	1.67	0.012906	1.615
16735636	RP11-5L12.1	1.25	0.14956	1.98	0.011638	1.615
17087052	RNU6-669P	2.2	0.010433	1.04	0.413585	1.62
17112993	TCEAL3-AS1	1.6	0.041941	1.66	0.143773	1.63
16665433	RNU6-414P	1.67	0.004536	1.59	0.006478	1.63
16684142	RNU7-45P	1.94	0.045273	1.33	0.161296	1.635
17124892	LOC101930106	1.54	0.236424	1.74	0.048512	1.64
16741897	RNU6-672P	1.27	0.35071	2.02	0.025951	1.645
16926390	KRTAP10-3	2.03	0.014662	1.26	0.123031	1.645
16711380	RP11-445P17.8	1.72	0.045042	1.58	0.156573	1.65
16886915	LOC100996579	1.91	0.020351	1.39	0.491645	1.65
17058015	LOC101928401	1.67	0.040659	1.64	0.003133	1.655
17122246	CHEK2P3	1.65	0.125532	1.66	0.028607	1.655
16782235	LOC101926933	1.53	0.000808	1.78	0.00293	1.655
16802042	RNU6-549P	1.58	0.028906	1.73	0.012612	1.655
16697296	GS1-174L6.4	1.68	0.019376	1.65	0.170902	1.665
16683866	LOC101928324	1.55	0.006549	1.78	0.042768	1.665
17083971	IFNA1	1.73	0.011815	1.61	0.115635	1.67
16743403	MIR548L	1.68	0.119736	1.68	0.006562	1.68
16937793	RNU6-377P	1.61	0.033756	1.75	0.002039	1.68
17078388	CASC9	1.28	0.162182	2.08	0.001401	1.68
16689371	GBP7	1.84	0.011857	1.52	0.200383	1.68
16728384	MIR548K	1.75	0.018256	1.62	0.109095	1.685
16846913	MTVR2	2.07	0.013114	1.3	0.387708	1.685
16904972	RNU6-1006P	1.62	0.020091	1.76	0.093698	1.69
17012434	RP1-86D1.5	1.98	0.044218	1.4	0.274723	1.69
16889450	RNU7-45P	2.04	0.028653	1.36	0.032817	1.7
16975886	RNU5E-3P	1.56	0.093941	1.86	0.007392	1.71
16967484	SMR3A	2.19	0.008981	1.23	0.199114	1.71
16691653	NBPF7	1.28	0.024875	2.16	0.024591	1.72
17081211	RNU6-1255P	1.26	0.3609	2.18	0.012519	1.72
17022610	RNU6-957P	1.78	0.045642	1.69	0.266008	1.735
16734742	RNU6-1143P	1.76	0.04728	1.72	0.142375	1.74
16669698	RN7SKP88	1.82	0.076702	1.67	0.019996	1.745
16778413	TPTE2P5	1.95	0.011889	1.54	0.052148	1.745
16779755	RNU6-79P	1.94	0.029715	1.61	0.183352	1.775
17121728	USP32P2	1.7	0.07471	1.85	0.027562	1.775
16736266	RNU6-593P	1.65	0.019979	1.93	0.008604	1.79
16799911	MIR626	1.72	0.06831	1.87	0.005041	1.795
16917466	RN7SKP69	1.62	0.078869	1.98	0.011767	1.8
17119434	MIR4637	1.71	0.029498	1.94	0.07669	1.825
17046652	RNU6-313P	1.77	0.011681	1.9	0.009386	1.835
16951293	MIR3134	1.26	0.488496	2.45	0.049954	1.855
16983456	RNU6-1003P	2.11	0.006615	1.61	0.102182	1.86
16673763	TOP1P1	1.99	0.014299	1.73	0.023472	1.86
16748498	MIR613	1.85	0.021376	1.92	0.028074	1.885
16686086	RNU6-870P	2.19	0.023115	1.58	0.087541	1.885
16881061	RNU6-1216P	2.19	0.01871	1.58	0.156599	1.885
17016612	LINC00533	1.45	0.100416	2.36	0.031818	1.905
16854395	RNU6-1289P	1.64	0.155221	2.18	0.041597	1.91
16974898	MIR573	1.66	0.268067	2.33	0.005021	1.995
16938971	RNA5SP129	1.98	0.082442	2.3	0.006677	2.14
16797527	IGHV3-38	2.67	0.011433	1.62	0.05884	2.145
17081527	RNU1-35P	1.74	0.04958	2.63	0.010768	2.185
16712732	RNU2-24P	1.84	0.230967	2.69	0.025058	2.265
17062702	RNU7-54P	1.92	0.049437	2.81	0.174062	2.365
16851950	MIR3975	2.21	0.036154	2.89	0.022662	2.55

## Sheet: HCC1806 and HCC1395
Transcript Cluster ID	Gene Symbol	Fold Change (linear) (1806 G1 vs. 1806 NG)	ANOVA p-value (1806 G1 vs. 1806 NG)	Fold Change (linear) (1806 G2 vs. 1806 NG)	ANOVA p-value (1806 G2 vs. 1806 NG)	Fold Change (linear) (1395 G1 vs. 1395 NG)	ANOVA p-value (1395 G1 vs. 1395 NG)	Fold Change (linear) (1395 G2 vs. 1395 NG)	ANOVA p-value (1395 G2 vs. 1395 NG)	sum
16994779	CDH10	-6.97	0.094284	-3.86	0.02341	-1.06	0.975765	-1.07	0.603167	-3.24
17046210	RNU6-1126P	-1.5	0.347136	-1.71	0.059463	-2.26	0.043404	-2.09	0.056696	-1.89
17094233	KGFLP2	-1.63	0.163952	-3.31	0.017352	-1.03	0.364614	-1.5	0.070635	-1.8675
17019610	SUPT3H	-2.51	0.069833	-1.64	0.002492	-2.08	0.00041	-1.2	0.055267	-1.8575
16774043	RNU6-71P	-1.97	0.047589	-1.24	0.073993	-2.1	0.210914	-1.97	0.2638	-1.82
16791527	LOC728755	-2.47	0.025426	-2.52	0.007533	-1.18	0.290718	-1.1	0.240633	-1.8175
16673227	RNU6-171P	-2.53	0.000741	-1.97	0.008803	-1.46	0.302752	-1.21	0.602327	-1.7925
16983501	RP11-774D14.1	-2.49	0.022414	-2.12	0.026118	-1.15	0.288713	-1.41	0.122637	-1.7925
17119354	MIR1224	-2.31	0.032233	-1.11	0.971002	-2.19	0.182377	-1.49	0.560865	-1.775
16688525	RNU6-1246P	-1.62	0.509707	-2.62	0.008099	-1.42	0.02366	-1.24	0.095997	-1.725
16701145	RP11-261C10.1	-1.41	0.16347	-1.62	0.040978	-2.04	0.278199	-1.78	0.115482	-1.7125
16746574	RP5-1154L15.1	-2.12	0.056813	-1.71	0.004505	-1.35	0.371761	-1.28	0.364186	-1.615
17005253	CDKAL1	-2.16	0.038697	-1.95	0.03387	-1.15	0.011672	-1.13	0.031898	-1.5975
16810011	MIR2116	-1.59	0.046402	-1.96	0.008128	-1.24	0.702681	-1.47	0.922685	-1.565
17072295	ZHX2	-2.32	0.015568	-1.57	0.002244	-1.26	0.002919	-1.08	0.520852	-1.5575
16973942	RN7SKP275	-1.33	0.625815	-1.4	0.506488	-2.34	0.030921	-1.07	0.822313	-1.535
17048223	LOC102723899	-1.9	0.072141	-2.07	0.033037	-1.04	0.841659	-1.09	0.674479	-1.525
16924141	BAGE2	-1.81	0.025454	-2.02	0.08944	-1.09	0.691086	-1.16	0.530831	-1.52
17115014	GABRA3	-1.72	0.012255	-1.41	0.006737	-1.32	0.077897	-1.62	0.065329	-1.5175
16784033	RP11-286O18.1	-1.65	0.038301	-1.26	0.259997	-1.81	0.087681	-1.29	0.014134	-1.5025
16705287	LOC101928913	-1.88	0.009069	-1.59	0.0241	-1.29	0.139819	-1.22	0.994603	-1.495
17018601	C6orf222	-1.42	0.389928	-1.59	0.219725	-1.61	0.037518	-1.3	0.100057	-1.48
17114952	RNU6-383P	-1.62	0.029407	-1.5	0.034991	-1.24	0.317213	-1.47	0.145208	-1.4575
17125760	PPP1R12BP1	-1.93	0.037023	-1.53	0.032823	-1.3	0.495919	-1.03	0.509525	-1.4475
17045230	AC006960.7	-1.77	0.017427	-1.64	0.016442	-1.23	0.608582	-1.13	0.523071	-1.4425
17083249	LOC101929302	-1.35	0.083756	-1.27	0.975346	-1.93	0.008459	-1.19	0.205826	-1.435
17039199	DDR1-AS1	-1.11	0.54589	-2.06	0.001566	-1.42	0.049875	-1.15	0.449494	-1.435
16670681	ANXA9	-1.23	0.538097	-1.36	0.20409	-1.32	0.241849	-1.81	0.049765	-1.43
16684389	SNORD85	-1.78	0.030736	-1.76	0.014311	-1.04	0.688573	-1.14	0.538015	-1.43
17074914	MSR1	-1.82	0.035515	-1.79	0.217539	-1.02	0.383948	-1.07	0.453441	-1.425
16903186	LRP1B	-1.24	0.015745	-1.41	0.012548	-1.89	0.028171	-1.16	0.090195	-1.425
17013769	RNU6-302P	-1.98	0.016565	-1.19	0.207393	-1.31	0.607309	-1.22	0.235086	-1.425
16931985	LOC101929372	-1.27	0.377461	-1.2	0.623947	-1.42	0.005008	-1.8	0.035608	-1.4225
16907952	AC107218.3	-1.83	0.031731	-1.25	0.516364	-1.25	0.161896	-1.3	0.415822	-1.4075
16761533	TAS2R42	-1.21	0.006877	-1.17	0.505518	-1.67	0.042151	-1.56	0.109294	-1.4025
16906256	LOC101927217	-1.22	0.471146	-1.35	0.342488	-1.34	0.062624	-1.62	0.001296	-1.3825
16805621	CTD-2054N24.1	-1.19	0.077356	-1.01	0.83644	-1.76	0.040446	-1.51	0.066793	-1.3675
17119110	MIR4526	-2.03	0.010893	-1.21	0.149728	-1.05	0.577053	-1.18	0.478147	-1.3675
17065938	RNA5SP255	-1.69	0.032419	-1.04	0.770934	-1.17	0.851565	-1.56	0.596728	-1.365
16950392	AC023481.1	-1.93	0.009359	-1.34	0.030829	-1.08	0.461056	-1.09	0.210775	-1.36
16953241	MAP4	-1.33	0.001388	-1.73	0.049285	-1.16	0.223623	-1.2	0.028025	-1.355
16867899	FLJ25758	-1.31	0.107172	-1.22	0.185825	-1.28	0.459653	-1.6	0.023583	-1.3525
16921461	LOC101930100	-1.69	0.029123	-1.45	0.018542	-1.18	0.002166	-1.09	0.024997	-1.3525
16924383	LOC101927797	-1.08	0.904625	-1.22	0.471842	-1.39	0.442278	-1.68	0.046584	-1.3425
17111549	PAGE3	-1.14	0.025459	-1.67	0.009528	-1.21	0.039301	-1.34	0.019247	-1.34
16848453	SLC39A11	-1.89	0.036197	-1.17	0.377063	-1.23	0.07376	-1.05	0.354303	-1.335
16754536	SYT1	-1.41	0.001378	-1.71	0.002211	-1.16	0.077163	-1.02	0.665504	-1.325
16882939	LOC101926959	-1.23	0.002624	-1.61	0.022084	-1.18	0.022234	-1.28	0.112368	-1.325
16960766	KCNAB1-AS2	-1.15	0.732851	-1.18	0.915558	-1.33	0.170889	-1.6	0.035425	-1.315
16874583	LRRC4B	-1.09	0.485702	-1	0.887482	-1.83	0.006867	-1.34	0.112386	-1.315
16996119	ARL15	-1.62	0.011372	-1.26	0.001946	-1.13	0.109921	-1.24	0.160427	-1.3125
16732520	TBCEL	-1.47	0.041153	-1.64	0.035395	-1.09	0.66124	-1.05	0.582411	-1.3125
16913848	RN7SKP100	-1.03	0.907188	-1.04	0.729114	-1.65	0.046901	-1.52	0.044655	-1.31
16854792	LINC00669	-1.63	0.035637	-1.51	0.025328	-1.01	0.27862	-1.08	0.427528	-1.3075
16779193	RNA5SP28	-1.09	0.875408	-1.14	0.836688	-1.27	0.114734	-1.71	0.03496	-1.3025
17065171	MIR596	-1.01	0.625834	-1.23	0.430742	-1.34	0.066539	-1.61	0.032902	-1.2975
17095638	MIR4290	-1.24	0.028518	-1.18	0.11669	-1.63	0.039993	-1.14	0.834038	-1.2975
16818239	ITGAM	-1.27	0.289253	-1.06	0.768352	-1.23	0.112089	-1.62	0.03311	-1.295
16796541	RP11-907D1.1	-1	0.519023	-1.04	0.781744	-1.64	0.010117	-1.49	0.185243	-1.2925
17059355	SEMA3D	-1.08	0.740488	-1.08	0.55838	-1.4	0.031837	-1.6	0.006352	-1.29
16959575	RNU6-1284P	-2.49	0.016274	-2.54	0.004086	-1.16	0.303513	1.08	0.37893	-1.2775
16987844	MAN2A1	-1.22	0.040984	-1.71	0.033515	-1.05	0.804921	-1.11	0.726366	-1.2725
17065958	TUSC3	-1.72	0.045631	-1.16	0.065695	-1.09	0.072809	-1.09	0.0701	-1.265
16743184	TRIM49	-1.1	0.842502	-1.09	0.825229	-1.23	0.160193	-1.6	0.026304	-1.255
16809457	MYO5A	-1.81	0.008537	-3.08	0.044457	1.13	0.250316	-1.25	0.200268	-1.2525
16970740	RP11-314N14.1	-1.73	0.041193	-1.15	0.397621	-1.08	0.78288	-1.03	0.960742	-1.2475
16698872	RP1-272L16.1	-1.69	0.036238	-1	0.583043	-1.13	0.147996	-1.16	0.200149	-1.245
17118784	MIR3159	-1.07	0.633975	-1.14	0.796067	-1.07	0.110959	-1.69	0.008424	-1.2425
17095194	RASEF	-1.08	0.382805	-1.14	0.088308	-1.06	0.246071	-1.64	0.033767	-1.23
17061586	RNA5SP236	-1.02	0.637639	-1.01	0.499987	-1.67	0.049306	-1.22	0.712993	-1.23
16999970	MIR1289-2	-1.03	0.865698	-1.02	0.963053	-1.02	0.727871	-1.7	0.012403	-1.1925
16944559	ARGFX	-1.29	0.513733	1.28	0.947675	-2.21	0.007607	-2.5	0.039033	-1.18
16959531	STAG1	-2.85	0.112838	-1.6	0.004941	-1.34	0.051991	1.09	0.208009	-1.175
17125616	RP11-314A15.2	-2.26	0.071329	-2.27	0.024999	-1.03	0.904412	1.08	0.625308	-1.12
16766862	RNU6-871P	-1.82	0.105364	-2.48	0.021598	-1.15	0.829851	1.06	0.965394	-1.0975
16777998	RNY1P4	1.14	0.460973	-1.83	0.321383	-2.19	0.025523	-1.37	0.637125	-1.0625
17013512	RP11-307P5.1	-1.47	0.018545	-2.47	0.042889	-1.18	0.517148	1.08	0.47092	-1.01
16923666	KRTAP10-11	1.02	0.500263	-1.05	0.731926	-1.8	0.053197	-2.18	0.015192	-1.0025
16729838	RNU6-1135P	1.31	0.584294	-1.41	0.478902	-1.73	0.251077	-2.16	0.033423	-0.9975
16874683	KLK5	1.04	0.65346	-1.1	0.573347	-1.9	0.038515	-2.02	0.061525	-0.995
16983611	LINC01021	-2.27	0.082986	-1.83	0.047163	-1.02	0.892897	1.15	0.703073	-0.9925
16722295	RNA5SP332	-1.73	0.025518	-1.73	0.01878	1.02	0.984539	-1.36	0.906471	-0.95
16855906	NETO1	-1.93	0.087865	-1.92	0.047627	1.14	0.644665	-1.08	0.384354	-0.9475
17098305	NR6A1	-1.7	0.067624	-1.97	0.013458	1.05	0.48549	-1.13	0.517018	-0.9375
17123750	SH3D19	-1.33	0.131694	1.05	0.614784	-1.4	0.224857	-1.98	0.006992	-0.915
16878438	MIR4263	-2.19	0.018425	-1.71	4.6e-05	-1.05	0.973756	1.31	0.044014	-0.91
16853985	AP002414.1	1.07	0.298895	-1.23	0.811386	-1.96	0.019502	-1.5	0.108753	-0.905
16919341	RNU6-1018P	-1.01	0.888789	1.31	0.416826	-2.03	0.115055	-1.83	0.040604	-0.89
16701608	OR2M7	-1.01	0.366735	1	0.780583	-1.9	0.015099	-1.59	0.238936	-0.875
16855093	SMAD2	-1.24	0.006582	-2.04	0.029952	1.01	0.915366	-1.2	0.042931	-0.8675
16876726	RNU6-649P	-1.6	0.029783	-1.68	0.01882	1.03	0.8533	-1.22	0.507926	-0.8675
16815756	PMM2	-1.21	0.132533	-2.2	0.038772	1.15	0.021978	-1.18	0.093568	-0.86
17085991	RNU6-1228P	-1.99	0.036049	-1.11	0.635405	1	0.45715	-1.33	0.357154	-0.8575
17047772	RNA5SP234	-1.18	0.17942	1.26	0.801288	-1.8	0.170222	-1.69	0.035219	-0.8525
17125970	MIR4632	-1.72	0.152953	1.09	0.496083	-1.73	0.041968	-1.02	0.959343	-0.845
17114241	HS6ST2	-1.73	0.043123	-1.52	0.005423	-1.16	0.013427	1.03	0.967046	-0.845
16759726	RP11-598F7.3	1.21	0.073486	-1.2	0.316045	-1.72	0.019233	-1.66	0.082043	-0.8425
16788729	MIR494	-1.76	0.036619	1.02	0.344825	-1.12	0.598865	-1.51	0.391628	-0.8425
16772316	RP11-575F12.2	1.05	0.607815	-1.33	0.05632	-1.7	0.008326	-1.37	0.07375	-0.8375
16794326	MED6	-1.35	0.039395	-1.98	0.040991	1.07	0.23878	-1.09	0.310551	-0.8375
17023350	RNU6-200P	-1.86	0.022755	-1.51	0.109354	-1.11	0.429676	1.19	0.77638	-0.8225
16840599	CLDN7	1.09	0.387265	-1.11	0.261152	-2.05	0.04404	-1.22	0.292098	-0.8225
16978728	TBCK	-1.67	0.019082	-1.49	0.024417	1.01	0.990609	-1.14	0.039482	-0.8225
16979336	LOC100507306	-1.64	0.025898	-1.52	0.220924	1.12	0.988426	-1.23	0.096606	-0.8175
16691574	RNA5SP56	-1.41	0.330199	1.03	0.648651	-1.15	0.204875	-1.72	0.006655	-0.8125
17121818	USP32	-2.06	0.048578	-1.2	0.027564	-1.08	0.005521	1.09	0.03327	-0.8125
16789019	TECPR2	-1.73	0.026279	1.01	0.533797	-1.41	0.002338	-1.11	0.021659	-0.81
16976583	UGT2A1	1.03	0.600645	-1.02	0.319587	-1.71	0.029876	-1.53	0.05063	-0.8075
16775811	GPC6	-1.21	0.796911	1.03	0.918051	-1.69	0.001636	-1.35	0.01795	-0.805
16980468	RNA5SP165	1.22	0.379908	-1.25	0.087434	-1.76	0.013877	-1.43	0.048293	-0.805
16870838	ZNF208	-1.22	0.984262	1.4	0.339793	-1.74	0.007243	-1.65	0.003053	-0.8025
16974779	GPR125	-1.27	0.0454	-1.86	0.044032	1.01	0.74675	-1.06	0.277549	-0.795
16782080	TRAJ22	-1.13	0.122049	1.25	0.008096	-1.64	0.136224	-1.64	0.026828	-0.79
17059911	PON3	-1.08	0.20948	1.08	0.710563	-1.55	0.013584	-1.6	0.032527	-0.7875
16950196	CHL1-AS1	-1.04	0.172648	1.08	0.925132	-1.66	0.007639	-1.5	0.021501	-0.78
17124146	MEI4	-1.61	0.036884	-1.53	0.03134	1.09	0.258176	-1.07	0.821503	-0.78
17071289	KCNS2	-1.61	0.044198	-1.4	0.425107	1.06	0.565892	-1.16	0.862537	-0.7775
16660527	ZBTB40	-1.3	0.034843	-1.81	0.044969	1.04	0.677247	-1.03	0.57768	-0.775
16895974	LOC100129995	1.25	0.387086	-1.04	0.184369	-1.83	0.033549	-1.45	0.54276	-0.7675
16874293	PTH2	-1.16	0.105412	1.14	0.470859	-1.35	0.110364	-1.67	0.002787	-0.76
16853019	RNA5SP460	1.26	0.323043	-1.02	0.416432	-1.9	0.007639	-1.38	0.103612	-0.76
17079513	RNU6-748P	-1.29	0.577566	-1.08	0.904967	-1.89	0.026037	1.22	0.490052	-0.76
16782010	TRAJ59	-1.03	0.666348	1.03	0.984401	-1.64	0.016098	-1.39	0.008641	-0.7575
16964904	RNA5SP152	-1.81	0.033486	-1.3	0.188948	1.18	0.367069	-1.09	0.613049	-0.755
16925466	HLCS	-1.27	0.035985	-1.73	0.010054	1.06	0.554678	-1.08	0.386956	-0.755
17079705	RNU6ATAC41P	-1.02	0.647915	1.19	0.158287	-1.49	0.058009	-1.68	0.039851	-0.75
16807302	RP11-37C7.2	-1.71	0.000349	1.04	0.666466	-1.19	0.418942	-1.14	0.272873	-0.75
16732755	GRAMD1B	-1.83	0.034595	1.06	0.630888	-1.16	0.080204	-1.06	0.370079	-0.7475
16887055	RNA5SP110	-1.66	0.033349	-1.16	0.456261	-1.18	0.170021	1.01	0.575699	-0.7475
16735223	OR2D2	-1.63	0.021307	-1.43	0.015764	1.13	0.63799	-1.05	0.702779	-0.745
16903771	CACNB4	1.05	0.693171	-1.07	0.543523	-1.61	0.001743	-1.32	0.034088	-0.7375
17002527	RNU6-168P	-1.72	0.005064	-1.34	0.176912	-1.01	0.87474	1.13	0.260149	-0.735
16968695	RNU1-36P	-1.16	0.651163	-1.02	0.964623	-1.78	0.007913	1.02	0.810114	-0.735
16897973	PUS10	-1.16	0.01683	-1.71	0.037618	1.05	0.595861	-1.11	0.07275	-0.7325
16909939	LOC151174	-1.6	0.037948	-1.34	0.226808	1.07	0.52195	-1.04	0.937141	-0.7275
16738094	RP11-750H9.7	-1.67	0.021182	-1.18	0.143522	1.06	0.646288	-1.12	0.445315	-0.7275
17052611	TRBV4-2	1.63	0.073628	-1.02	0.263225	-1.28	0.299083	-2.22	0.038447	-0.7225
16684391	NKAIN1	-1.1	0.956877	1.32	0.137031	-1.34	0.038021	-1.77	0.036456	-0.7225
16882812	GGT8P	1.23	0.603631	-1.02	0.467717	-1.36	0.094916	-1.74	0.02213	-0.7225
17105665	LINC00630	-1.67	0.016768	-1.18	0.112024	-1.05	0.781639	1.02	0.703195	-0.72
16775144	RNA5SP30	-1.72	0.027217	-1.02	0.604032	1.12	0.618809	-1.2	0.666121	-0.705
16794539	RP3-414A15.11	-1.35	0.018232	-1.62	0.041632	-1.02	0.977373	1.18	0.036044	-0.7025
17114470	CT45A6	-1.07	0.995851	1.15	0.242645	-1.16	0.346504	-1.73	0.032147	-0.7025
17103864	LOC401589	1.05	0.754006	-1.1	0.540144	-1.12	0.387797	-1.62	0.028899	-0.6975
17111020	LOC401589	1.05	0.754006	-1.1	0.540144	-1.12	0.387797	-1.62	0.028899	-0.6975
16868760	RNU7-140P	-1.39	0.406643	-1.9	0.01401	1.67	0.375576	-1.15	0.602077	-0.6925
17056319	AC007285.7	-1.68	0.035486	-1.14	0.386566	1.06	0.731422	-1.01	0.987521	-0.6925
17052295	RAB19	1.15	0.244211	-1.09	0.393755	-1.13	0.296721	-1.67	0.04336	-0.685
16848095	MIR635	-1.76	0.022414	-1.19	0.508441	1.31	0.200387	-1.08	0.656955	-0.68
16806101	RNU6-741P	-1.02	0.393055	1.88	0.000295	-1.86	0.168696	-1.71	0.290608	-0.6775
17113335	SNORD96B	-1.68	0.023294	-1.21	0.491403	1.31	0.590586	-1.13	0.579272	-0.6775
16686745	CYP4A11	-1.07	0.702887	1.53	0.58347	-1.77	0.031973	-1.27	0.102835	-0.645
16857748	CLEC4M	-1.12	0.24396	1.26	0.349914	-1.1	0.704627	-1.6	0.047788	-0.64
17101445	RNU6-800P	-1.3	0.049864	-1.23	0.201035	1.62	0.034275	-1.02	0.7803	-0.4825
16727074	OVOL1	1.69	0.035928	-1.17	0.615664	-1.37	0.161738	-1.01	0.453621	-0.465
17122496	LINC00152	-1.84	0.020973	-2.14	0.057207	1.07	0.288527	1.08	0.57679	-0.4575
16793692	KCNH5	-2.22	0.024218	-1.77	0.224032	1.19	0.309599	1.11	0.452274	-0.4225
16927718	BMS1P20	-1.75	0.098798	-2.06	0.004006	1.08	0.530687	1.07	0.234899	-0.415
17122474	LINC00152	-1.44	0.041981	-2.17	0.039637	1.02	0.667017	1.1	0.175378	-0.3725
16994364	LOC389273	1.66	0.002645	-1.07	0.374379	-1.05	0.740694	-1.02	0.443002	-0.37
17122488	MIR4435-1HG	-1.93	0.00291	-1.78	0.108193	1.12	0.250725	1.13	0.239666	-0.365
17081211	RNU6-1255P	-2.22	0.138049	-2.67	0.015338	1.26	0.3609	2.18	0.012519	-0.3625
17122646	LINC00152	-1.79	0.045563	-2.19	0.094387	1.16	0.694914	1.44	0.050948	-0.345
16887936	HOXD10	1.19	0.02942	1.01	0.521792	-1.81	0.065619	-1.76	0.019417	-0.3425
17091993	RNU6-1073P	-1.89	0.025544	-1.63	0.027339	1.15	0.63237	1.01	0.95902	-0.34
16774319	DGKH	-1.41	0.019515	-1.93	0.015866	1.01	0.729096	1.07	0.335188	-0.315
17126016	MIR4469	1.01	0.752696	1.3	0.599774	-1.52	0.461653	-2.04	0.034834	-0.3125
17122494	LINC00152	-1.55	0.043871	-1.91	0.029889	1.08	0.938217	1.13	0.076769	-0.3125
16808563	RP11-109D20.2	1.18	0.191191	1.19	0.692421	-1.3	0.400679	-2.3	0.020618	-0.3075
17120392	ANKRD30BP3	1.84	0.035794	-1.01	0.597302	-1	0.701518	-1.05	0.338087	-0.305
16981848	RP11-18D7.2	1.24	0.536046	1.19	0.470323	-1.71	0.005093	-1.9	0.00454	-0.295
17002612	SLIT3	1.28	0.596963	1.21	0.473524	-1.63	0.000134	-1.99	0.001382	-0.2825
16930199	APOBEC3G	1.05	0.489797	1.05	0.492126	-1.24	0.126088	-1.92	0.013106	-0.265
16693383	PGLYRP3	1.2	0.29153	1.15	0.445858	-1.37	0.094849	-2.01	0.000403	-0.2575
16781587	EDDM3B	-1.83	0.001777	-1.32	0.099331	1.08	0.602989	1.06	0.807225	-0.2525
16990542	CTB-57H20.1	1.06	0.444956	1.35	0.404	-1.74	0.048119	-1.68	0.207453	-0.2525
16927702	IGLV6-57	1.02	0.691459	1.19	0.752949	-1.23	0.62289	-1.98	0.011497	-0.25
16742690	RNU6-311P	-1.73	0.004613	-1.48	0.554173	1.12	0.805778	1.09	0.525745	-0.25
16823744	RNU7-63P	1.1	0.231156	1.08	0.965346	-2.03	0.031725	-1.1	0.469636	-0.2375
16985067	PART1	1.13	0.569599	1.14	0.217644	-1.56	0.045414	-1.65	0.029609	-0.235
17058643	RNA5SP233	1.01	0.494259	1.73	0.100184	-1.82	0.174002	-1.81	0.011688	-0.2225
16865018	MIR1323	-2.27	0.035423	-1.2	0.858744	1.41	0.013028	1.17	0.081301	-0.2225
16875217	MIR371B	-1.91	0.006481	1.02	0.954915	-1.03	0.666393	1.04	0.291917	-0.22
16678994	RNU6-968P	-1.73	0.042733	-1.4	0.321416	1.04	0.580806	1.23	0.441972	-0.215
17056954	AC004837.4	1.05	0.403614	1.02	0.899938	-1.32	0.025713	-1.6	0.030607	-0.2125
17024219	MIR3145	-1.47	0.041981	-1.67	0.003293	1.13	0.265487	1.2	0.096249	-0.2025
17025498	DNM1L	-1.8	0.01649	-1.13	0.560577	1.03	0.368799	1.1	0.539856	-0.2
16812053	TBC1D2B	-1.72	0.02309	1	0.275219	-1.08	0.255725	1.01	0.810372	-0.1975
16677929	RNU6-1008P	1.07	0.691905	1.21	0.530672	-1.26	0.186314	-1.81	0.038994	-0.1975
17102422	RNU6-1087P	1.16	0.496785	1.74	0.006158	-1.56	0.146676	-2.1	0.048801	-0.19
16843215	AC090616.2	1.14	0.25995	1.11	0.174469	-1.25	0.054067	-1.76	0.002915	-0.19
16705089	BICC1	1.81	0.296249	1.23	0.300717	-2.21	0.001753	-1.58	0.009853	-0.1875
16956386	ROBO1	-1.71	0.042087	1.09	0.648516	-1.18	0.027741	1.07	0.578392	-0.1825
17113062	TEX13A	1.14	0.417075	1.06	0.35301	-1.19	0.067817	-1.73	0.009054	-0.18
16971019	GAB1	-1.66	0.011654	-1.23	0.161855	1.11	0.304193	1.06	0.143415	-0.18
17125996	MIR4747	1.17	0.443621	1.08	0.824233	-1.31	0.420078	-1.64	0.03842	-0.175
16967360	LOC101929979	-1.61	0.026721	-1.46	0.034411	1.27	0.005672	1.12	0.434597	-0.17
17105645	GPRASP1	1.18	0.601042	1.02	0.851542	-1.69	0.02803	-1.15	0.643097	-0.16
16679438	RNA5SP81	1.04	0.432495	1.03	0.969118	-1.07	0.378998	-1.62	0.011064	-0.155
16793488	L3HYPDH	-1.17	0.028845	-1.61	0.000413	1.13	0.230419	1.04	0.764233	-0.1525
17051089	FSCN3	1.27	0.080256	1.13	0.176913	-1.69	0.030307	-1.32	0.12833	-0.1525
17110322	EFHC2	-1.74	0.037984	-1.4	0.123783	1.41	0.759978	1.13	0.951044	-0.15
16838266	RNU1-80P	1.47	0.198869	1.21	0.150225	-1.08	0.616202	-2.16	0.01098	-0.14
17071257	RNU6-703P	-1.48	0.28309	1.82	0.379844	-2.21	0.003618	1.31	0.67232	-0.14
17101285	RNU6-114P	-1.13	0.655206	1.15	0.241755	-1.6	0.019797	1.09	0.959088	-0.1225
17068349	C8orf4	1.24	0.618862	1.08	0.621237	-1.64	0.001002	-1.15	0.072559	-0.1175
16796664	RP11-638I2.4	-1.43	0.16713	-1.98	0.033957	1.64	0.044509	1.35	0.095252	-0.105
16931543	MIR4535	1.52	0.138468	1.53	0.035984	-1.6	0.053129	-1.76	0.016106	-0.0775
17044692	PRR15	1.12	0.838824	1.3	0.771634	-1.63	0.045186	-1.1	0.497778	-0.0775
17094074	RNU7-124P	-1.8	0.043522	-1.4	0.434039	1.54	0.262899	1.35	0.161167	-0.0775
16957612	DRD3	-1.64	0.028695	-1	0.807182	1.32	0.033875	1.05	0.599435	-0.0675
16768618	TMCC3	1.41	0.035179	1.09	0.14759	-1.02	0.324438	-1.73	0.01281	-0.0625
17072723	RNU1-106P	-2.03	0.173425	-1.43	0.023976	1.63	0.017617	1.58	0.116372	-0.0625
17119698	RNU1-106P	-2.03	0.173425	-1.43	0.023976	1.63	0.017617	1.58	0.116372	-0.0625
16667293	LOC100505940	1.43	0.075182	1.28	0.105772	-1.68	0.002294	-1.27	0.005943	-0.06
16773224	C1QTNF9	-1.78	0.004434	-1.04	0.326701	1.39	0.457928	1.27	0.213354	-0.04
16852079	RNU6-706P	-1.32	0.350838	-1.6	0.033616	1.08	0.455824	1.68	0.666118	-0.04
16910589	DEFB132	1.34	0.499541	1.43	0.211036	-1.64	0.003881	-1.19	0.222246	-0.015
16855340	SNORA37	-1.61	0.004693	-1.36	0.077385	1.53	0.32152	1.4	0.359581	-0.01
16736656	RNA5SP335	1.87	0.629179	1.65	0.133314	-1.83	0.03337	-1.7	0.042868	-0.0025
16874202	CGB7	1.59	0.025012	1.26	0.272733	-1.81	0.031749	-1.04	0.588655	0
16938475	CMC1	-1.38	0.053328	-1.5	0.102286	1.25	0.07256	1.64	0.005344	0.0025
17005092	RNU6-1114P	1.05	0.357393	1.8	0.012676	-1.6	0.328937	-1.18	0.84755	0.0175
16880251	AC012358.8	-1.67	0.002023	-1.02	0.398965	1.26	0.185269	1.53	0.103312	0.025
16862375	CYP2B7P	1.71	0.041428	1.08	0.852914	-1.43	0.32082	-1.24	0.518853	0.03
16897662	RNU6-433P	-1.31	0.526901	-1.37	0.391658	1.03	0.3138	1.78	0.000112	0.0325
16738+78:89657	GLYATL2	-1.31	0.039658	-1.49	0.058577	1.28	0.409151	1.71	0.046846	0.0475
16741897	RNU6-672P	-1.44	0.14842	-1.62	0.02905	1.27	0.35071	2.02	0.025951	0.0575
17122940	CECR7	-1.25	0.375542	-1.44	0.139404	1.34	0.009601	1.6	0.008451	0.0625
17013247	RP3-468K18.5	-1.33	0.189611	-1.26	0.645313	1.23	0.244425	1.61	0.023219	0.0625
17097130	RNU6-124P	1.61	0.03442	1.25	0.418057	-1.37	0.607594	-1.18	0.977383	0.0775
16840195	INCA1	1.73	0.008239	1.14	0.236713	-1.25	0.423409	-1.29	0.292528	0.0825
16682671	AKR7L	-1.31	0.475437	1.13	0.070072	-1.08	0.912279	1.61	0.022862	0.0875
17087052	RNU6-669P	-1.27	0.102633	-1.61	0.323069	2.2	0.010433	1.04	0.413585	0.09
17118760	SNORD98	-1.34	0.757985	-1.3	0.062143	1.6	0.029577	1.45	0.421407	0.1025
16881065	AC092431.2	1.64	0.026343	1.12	0.480049	-1.2	0.583215	-1.14	0.651271	0.105
16960705	PLCH1	-1.25	0.392423	-1.04	0.50651	1.08	0.647155	1.64	0.005628	0.1075
17100685	MT-TT	-1.23	0.12912	-1.28	0.055931	1.31	0.086808	1.63	0.048231	0.1075
17068064	LETM2	-1.27	0.495535	-1.01	0.351891	1.63	0.019202	1.09	0.616174	0.11
17077267	RNU6ATAC32P	1.3	0.78189	2.17	0.032274	-1.41	0.397171	-1.6	0.463641	0.115
17070703	RNA5SP273	1.48	0.043281	1.69	0.050728	-1.62	0.00116	-1.08	0.662609	0.1175
16994696	RP11-124N3.3	1.67	0.009358	1.18	0.228848	-1.02	0.746554	-1.34	0.260492	0.1225
17078388	CASC9	-1.49	0.632841	-1.36	0.878006	1.28	0.162182	2.08	0.001401	0.1275
16797421	IGHD2-21	1.31	0.026413	1.63	0.015609	-1.17	0.889396	-1.26	0.664109	0.1275
17059087	RNU6-530P	1.7	0.027007	1.03	0.618061	-1.17	0.042529	-1.04	0.625049	0.13
16675376	MIR1278	-1.06	0.762819	-1.23	0.697862	1.21	0.202238	1.61	0.033812	0.1325
16949909	MIR570	-1.27	0.130008	-1.29	0.276856	1.52	0.023738	1.6	0.015306	0.14
16852568	RNU6-742P	-1.08	0.249823	1.13	0.703355	-1.08	0.127783	1.63	0.002806	0.15
17125878	LOC644083	1.49	0.016819	1.69	0.04601	-1.09	0.669981	-1.49	0.270123	0.15
17125910	LOC644083	1.49	0.016819	1.69	0.04601	-1.09	0.669981	-1.49	0.270123	0.15
16836269	RNU6-1249P	-1.34	0.167317	-1.23	0.273513	1.58	0.000273	1.6	0.00595	0.1525
16904972	RNU6-1006P	-1.44	0.706895	-1.29	0.915522	1.62	0.020091	1.76	0.093698	0.1625
17008461	TREML5P	1.82	0.041789	1.41	0.264494	-1.55	0.093171	-1.02	0.571511	0.165
16784272	RP11-589M4.1	-1.11	0.152086	-1.1	0.061031	1.25	0.270679	1.64	0.027963	0.17
16698405	RNA5SP74	-1.09	0.755944	-1.14	0.31392	1.66	0.026782	1.27	0.311959	0.175
16782235	LOC101926933	-1.33	0.267351	-1.24	0.237091	1.53	0.000808	1.78	0.00293	0.185
16846913	MTVR2	-1.16	0.158423	-1.47	0.024104	2.07	0.013114	1.3	0.387708	0.185
17064686	AC073236.3	-1.2	0.280381	-1.17	0.125891	1.8	0.007278	1.32	0.159168	0.1875
17122246	CHEK2P3	-1.42	0.257428	-1.14	0.666062	1.65	0.125532	1.66	0.028607	0.1875
16926390	KRTAP10-3	-1.32	0.636133	-1.2	0.013452	2.03	0.014662	1.26	0.123031	0.1925
16728384	MIR548K	-1.26	0.55762	-1.33	0.213172	1.75	0.018256	1.62	0.109095	0.195
16924473	AP000477.2	1.79	0.012131	-1.1	0.977711	1.15	0.910576	-1.04	0.724302	0.2
16956196	FOXP1-IT1	-1.16	0.743175	-1.09	0.539239	1.91	0.005787	1.15	0.142394	0.2025
16769941	RNU4-32P	-1.24	0.683241	-1.07	0.544802	1.66	0.011264	1.47	0.004418	0.205
16686253	ERI3-IT1	-1.15	0.325462	-1.25	0.342028	1.47	0.018428	1.75	0.017366	0.205
16869942	CYP4F2	-1.08	0.912747	-1.02	0.912306	1.65	0.01297	1.31	0.145721	0.215
16677497	RP5-1111A8.3	1.72	0.037255	1.55	0.046463	-1.31	0.339502	-1.1	0.579547	0.215
16764285	TUBA1B	1.71	0.051804	1.62	0.042407	-1.06	0.547685	-1.37	0.026316	0.225
16802042	RNU6-549P	-1.04	0.705105	-1.35	0.495684	1.58	0.028906	1.73	0.012612	0.23
16697296	GS1-174L6.4	-1.13	0.893832	-1.26	0.796333	1.68	0.019376	1.65	0.170902	0.235
16691653	NBPF7	-1.26	0.233444	-1.24	0.836568	1.28	0.024875	2.16	0.024591	0.235
16951293	MIR3134	-1.39	0.289501	-1.35	0.27227	1.26	0.488496	2.45	0.049954	0.2425
16920473	SUMO1P1	2.6	0.023667	1.11	0.662827	-1.44	0.058334	-1.23	0.483166	0.26
16663051	ZFP69B	1.64	0.01508	1.5	0.055869	-1.03	0.307752	-1.05	0.405408	0.265
16937793	RNU6-377P	-1.28	0.769109	-1.01	0.831504	1.61	0.033756	1.75	0.002039	0.2675
16735636	RP11-5L12.1	-1.06	0.903797	-1.06	0.272332	1.25	0.14956	1.98	0.011638	0.2775
16899084	RNA5SP97	-1.02	0.979788	-1.02	0.572039	1.69	0.015495	1.46	0.001887	0.2775
16779755	RNU6-79P	-1.35	0.125839	-1.05	0.540061	1.94	0.029715	1.61	0.183352	0.2875
17121728	USP32P2	-1.09	0.872647	-1.26	0.119174	1.7	0.07471	1.85	0.027562	0.3
17012434	RP1-86D1.5	-1.15	0.95863	-1.03	0.674172	1.98	0.044218	1.4	0.274723	0.3
16798518	RP11-100M12.2	1.48	0.017375	2.13	0.01779	-1.18	0.638868	-1.18	0.53141	0.3125
17022610	RNU6-957P	-1.08	0.942504	-1.13	0.889062	1.78	0.045642	1.69	0.266008	0.315
16871178	RN7SKP22	-2.15	0.042258	1.08	0.904389	1.05	0.935818	1.29	0.956426	0.3175
16974898	MIR573	-1.39	0.04728	-1.31	0.217112	1.66	0.268067	2.33	0.005021	0.3225
16863593	C5AR2	-1.72	0.006093	1.02	0.449326	1.01	0.513142	1.05	0.249672	0.34
17119434	MIR4637	-1.25	0.292838	-1.03	0.732373	1.71	0.029498	1.94	0.07669	0.3425
16835123	RNU6ATAC3P	-1.9	0.031246	1.07	0.531384	1.25	0.043379	1.07	0.292032	0.3725
16988085	RNU4ATAC13P	1.68	0.353589	2.38	0.032586	-1.21	0.156604	-1.34	0.18245	0.3775
16881061	RNU6-1216P	-1.13	0.698727	-1.13	0.72545	2.19	0.01871	1.58	0.156599	0.3775
17118984	MIR4716	1.14	0.678085	1.04	0.465184	1.36	0.840576	-1.89	0.0177	0.4125
16834630	RNU6-406P	2.54	0.024185	1.26	0.336698	-1.04	0.589273	-1.08	0.580894	0.42
16938971	RNA5SP129	-1.03	0.886281	-1.25	0.418871	1.98	0.082442	2.3	0.006677	0.5
17081527	RNU1-35P	-1.11	0.344917	-1.04	0.841494	1.74	0.04958	2.63	0.010768	0.555
17125176	VLDLR-AS1	1.68	0.041954	1.03	0.654498	1.01	0.623953	-1.36	0.094152	0.59
16900286	LINC00342	1.01	0.624973	-1.4	0.809845	1.04	0.319787	1.79	0.005564	0.61
16949922	SDHAP2	1.62	0.028846	1.09	0.619268	1.02	0.813677	-1.27	0.167315	0.615
17001757	ZNF300P1	1.28	0.443839	1.73	0.381534	1.2	0.158478	-1.74	0.022867	0.6175
16818666	RNA5SP425	-1.3	0.134201	1.06	0.954692	1.65	0.044923	1.14	0.189091	0.6375
17120778	LOC100506691	1.72	0.047575	1.12	0.466127	1.04	0.109831	-1.31	0.05281	0.6425
16792194	RNU6-1277P	-1.47	0.216939	1.11	0.808797	1.21	0.396156	1.72	0.03452	0.6425
16703758	RNU7-22P	-1.37	0.250669	1.01	0.929605	1.34	0.107244	1.67	0.025261	0.6625
16880648	LOC100507006	1.66	0.007456	1.24	0.431357	-1.19	0.270039	1.01	0.907322	0.68
16745651	OR8B8	-1.61	0.022369	1.14	0.553299	1.18	0.405975	2.02	0.544418	0.6825
16761526	TAS2R30	-1.59	0.63278	1.1	0.756859	1.56	0.018432	1.67	0.012906	0.685
17072632	RNU6-869P	-1.23	0.646616	1.33	0.709618	1.64	0.033707	1.03	0.461743	0.6925
16833706	MIR4727	1.63	0.049171	1.22	0.106424	1.02	0.953696	-1.08	0.890811	0.6975
16665433	RNU6-414P	-1.49	0.432391	1.06	0.469037	1.67	0.004536	1.59	0.006478	0.7075
17011338	RNU6-527P	-1.04	0.650791	1.13	0.462951	1.68	0.017996	1.08	0.363036	0.7125
16974686	AC006160.5	1.68	0.003522	1.31	0.138331	-1.2	0.792431	1.06	0.930767	0.7125
16794974	RP11-270M14.4	1.62	0.015861	1.02	0.90902	1.26	0.087528	-1.02	0.745016	0.72
16961747	RNU6-1120P	1.21	0.664638	1.81	0.002605	1.04	0.403672	-1.18	0.038286	0.72
16782008	TRAJ61	1.65	0.012497	1.1	0.648433	-1.13	0.466336	1.3	0.323782	0.73
16969553	RNU6-551P	1.68	0.017093	1.39	0.116586	1.01	0.941498	-1.16	0.66415	0.73
16972053	RP11-234O6.2	1.22	0.032215	1.69	0.010289	1.08	0.746026	-1.06	0.896419	0.7325
16909524	SNORD82	1.07	0.9223	-1.13	0.393348	1.27	0.798113	1.76	0.043723	0.7425
16761523	TAS2R43	1.15	0.633913	1.17	0.212229	-1.11	0.424158	1.78	0.011213	0.7475
16929507	RNU7-167P	-1.05	0.533845	1.09	0.982053	1.79	0.046014	1.16	0.368352	0.7475
16851950	MIR3975	-1.08	0.304343	-1.02	0.191825	2.21	0.036154	2.89	0.022662	0.75
16763465	RACGAP1P	1.13	0.845091	-1.01	0.422487	1.24	0.383818	1.64	0.03654	0.75
16916559	SNORD119	1.25	0.883793	-1.21	0.526693	1.23	0.006302	1.76	0.000187	0.7575
16974113	RN7SKP36	1.72	0.000368	1.38	0.000992	-1.11	0.272045	1.05	0.699495	0.76
16821015	RP11-53L24.1	-1.09	0.909908	1.19	0.716374	1.19	0.456335	1.75	0.005223	0.76
16757873	SIRT4	1.7	0.008163	1.39	0.010111	1.12	0.41569	-1.17	0.236299	0.76
17112993	TCEAL3-AS1	1.14	0.538935	-1.35	0.023481	1.6	0.041941	1.66	0.143773	0.7625
16736682	NAV2-AS1	1.05	0.707169	-1.16	0.742984	1.45	0.017043	1.71	0.017409	0.7625
17117027	NLGN4Y-AS1	1.06	0.362343	-1.04	0.405621	1.75	0.037471	1.29	0.119652	0.765
16854702	INO80C	1.01	0.734463	-1	0.891039	1.62	0.003981	1.45	0.000126	0.77
16667492	LOC729987	-1.08	0.656326	1.13	0.941513	1.9	0.012905	1.14	0.545961	0.7725
16710120	MIR3941	1.17	0.663788	-1.09	0.469395	1.37	0.140668	1.66	5.3e-05	0.7775
16853001	RP11-41O4.1	-1.04	0.358548	1.11	0.213044	1.68	0.003299	1.37	0.089703	0.78
16980879	RP11-27G13.1	1.28	0.160609	1.25	0.481269	1.6	0.039036	-1.01	0.963644	0.78
16894824	OSR1	1.48	0.003893	1.64	0.001203	-1.05	0.850369	1.07	0.512287	0.785
16766588	MIR616	1.08	0.354961	-1.03	0.87421	1.63	0.018058	1.49	0.044536	0.7925
17008720	GNMT	1.74	0.037991	1.38	0.240991	-1	0.626003	1.05	0.891304	0.7925
16900856	RNU7-96P	1.14	0.773678	-1.17	0.441053	1.59	0.032512	1.62	0.023435	0.795
17125288	AQP7P3	1.14	0.188228	-1.12	0.381562	1.69	0.00729	1.48	0.114595	0.7975
17092875	IFNE	-1	0.716501	1.06	0.288813	1.65	0.03788	1.5	0.198158	0.8025
16736266	RNU6-593P	-1.38	0.352713	1.03	0.822171	1.65	0.019979	1.93	0.008604	0.8075
16865054	MIR520C	-1.04	0.80184	1.41	0.324744	1.09	0.279456	1.8	0.00454	0.815
17083971	IFNA1	-1.09	0.684375	1.03	0.647895	1.73	0.011815	1.61	0.115635	0.82
16734524	SNORA54	1.91	0.008877	1.49	0.044408	1	0.642301	-1.12	0.965781	0.82
16743403	MIR548L	1.01	0.886298	-1.06	0.084373	1.68	0.119736	1.68	0.006562	0.8275
16702543	RNU6ATAC39P	1.89	0.006297	1.26	0.145794	-1.09	0.883245	1.25	0.726767	0.8275
16886915	LOC100996579	1.04	0.558008	-1.02	0.788671	1.91	0.020351	1.39	0.491645	0.83
16854395	RNU6-1289P	1.12	0.796371	-1.61	0.060573	1.64	0.155221	2.18	0.041597	0.8325
16734339	MIR4298	1.45	0.025717	2.09	0.005025	1.03	0.541514	-1.2	0.311442	0.8425
17058015	LOC101928401	1.12	0.367849	-1.05	0.781991	1.67	0.040659	1.64	0.003133	0.845
16917466	RN7SKP69	1.01	0.835631	-1.16	0.51197	1.62	0.078869	1.98	0.011767	0.8625
16934743	SSTR3	1.73	0.012185	1.64	0.075627	-1.06	0.001523	1.16	0.919058	0.8675
16998515	LOC100133050	1.74	0.048194	1.87	0.053596	-1.17	0.169119	1.1	0.708497	0.885
16918607	MIR499B	-1.07	0.604918	1.92	0.003493	1.63	0.239983	1.09	0.533536	0.8925
16812023	LOC645752	1.9	0.041185	1.54	0.080363	1.2	0.846076	-1.06	0.227422	0.895
16991694	RNU4ATAC2P	1.7	0.026638	1.77	0.010138	1.24	0.541436	-1.09	0.373756	0.905
16975886	RNU5E-3P	1.32	0.717602	-1.04	0.937635	1.56	0.093941	1.86	0.007392	0.925
16794153	CTD-2325P2.3	1.89	0.093989	1.83	0.031024	1.08	0.908368	-1.02	0.668945	0.945
16994803	RP11-549K20.1	-1.16	0.0161	1.77	0.005598	1.66	0.094314	1.52	0.264932	0.9475
16798688	ULK4P3	2.15	0.109212	1.66	0.026268	1.07	0.409359	-1.05	0.308182	0.9575
16776096	MIR4306	1.94	0.044141	1.5	0.260761	1.51	0.426632	-1.08	0.404656	0.9675
16706706	RNU6-441P	1.62	0.056048	1.97	0.025142	1.48	0.317018	-1.17	0.075991	0.975
16994209	RN7SKP79	1.91	0.167647	2.1	0.030793	-1.13	0.749397	1.05	0.404102	0.9825
16848894	MIR4738	2.74	0.027348	1.31	0.140546	1.06	0.188168	-1.12	0.993764	0.9975
16828540	RNA5SP430	2.27	0.01215	1.94	0.284763	-1.1	0.256453	1.02	0.452554	1.0325
16863566	MIR3190	1.66	0.288469	1.9	0.013852	1.76	0.457364	-1.09	0.808735	1.0575
16714373	LOC102724719	1.07	0.469954	1.04	0.689051	1.1	0.251431	1.65	0.014428	1.215
16876297	KIR3DL2	1.63	0.012987	1.12	0.32573	1.04	0.794234	1.22	0.935289	1.2525
16995455	RNU6-1190P	1.02	0.472922	1.01	0.416948	1.65	0.00337	1.34	0.283793	1.255
16666348	RP4-564M11.2	1.07	0.345346	1.62	0.006252	1.11	0.355758	1.23	0.016094	1.2575
16761541	PRB4	1.15	0.815865	1.1	0.451516	1.04	0.720167	1.76	0.016282	1.2625
17055140	COL28A1	1.6	0.008893	1.01	0.588693	1.28	0.092903	1.2	0.173922	1.2725
17117853	FLJ38379	1.25	0.757559	1.17	0.8145	1.05	0.782418	1.72	0.029969	1.2975
17124448	DPY19L2P3	1.03	0.837187	1.07	0.935241	1.34	0.020502	1.75	0.026618	1.2975
17056281	AC007255.8	1.02	0.971436	1.3	0.644122	1.21	0.193864	1.67	0.014523	1.3
16778637	SMIM2-IT1	1.16	0.518866	1.23	0.289522	1.27	0.048166	1.66	0.017626	1.33
16899478	LOC101927967	1.05	0.828643	1.22	0.119608	1.35	0.651767	1.7	0.04872	1.33
17085829	GDA	1.23	0.082485	1.15	0.064729	1.33	0.033049	1.64	0.038632	1.3375
16993908	MIR4635	1.7	0.043434	1.36	0.165373	1.13	0.795877	1.16	0.843493	1.3375
16891575	ACSL3	1.57	0.033592	1.74	0.02158	1.05	0.063592	1.01	0.230595	1.3425
17121330	RPL29P30	1.33	0.250532	1.12	0.957155	1.85	0.012128	1.07	0.64959	1.3425
16683866	LOC101928324	1.07	0.391649	1.03	0.706152	1.55	0.006549	1.78	0.042768	1.3575
16689371	GBP7	1.04	0.352731	1.08	0.335257	1.84	0.011857	1.52	0.200383	1.37
16986939	RNU4-11P	1.62	0.022952	1.24	0.482607	1.26	0.125665	1.36	0.253162	1.37
17019817	RP11-550C4.6	1.87	0.017225	1.26	0.013911	1.19	0.389688	1.17	0.46339	1.3725
16909411	RNY4P19	1.32	0.698264	1.09	0.870919	1.43	0.04507	1.67	0.014356	1.3775
16758872	RNU6-927P	1.13	0.983791	1.51	0.040006	1.81	0.024827	1.07	0.938056	1.38
17012125	RNU6-194P	1.21	0.034565	1.18	0.200493	1.29	0.322159	1.86	0.014856	1.385
16844644	KRT33A	1.49	0.371248	1.76	0.044497	1.13	0.08446	1.26	0.016066	1.41
16764598	MIR1293	1.67	0.062782	1.79	0.039075	1.07	0.795813	1.11	0.382043	1.41
16799911	MIR626	1.01	0.420061	1.06	0.932939	1.72	0.06831	1.87	0.005041	1.415
16967484	SMR3A	1.14	0.312294	1.1	0.352274	2.19	0.008981	1.23	0.199114	1.415
16734742	RNU6-1143P	1.19	0.279923	1.02	0.728093	1.76	0.04728	1.72	0.142375	1.4225
16879174	QPCT	1.83	0.008216	1.48	0.097956	1.18	0.836553	1.22	0.605489	1.4275
16991760	MIR3142	1.43	0.170348	1.15	0.649881	1.55	0.039314	1.63	0.024984	1.44
16766403	TMEM194A	1.73	0.067194	1.88	0.036529	1.1	0.444303	1.06	0.778894	1.4425
16788725	MIR329-1	1.73	0.005543	1.58	0.038509	1.03	0.996294	1.45	0.352347	1.4475
16673763	TOP1P1	1	0.427268	1.07	0.277246	1.99	0.014299	1.73	0.023472	1.4475
17046652	RNU6-313P	1.02	0.876815	1.13	0.149242	1.77	0.011681	1.9	0.009386	1.455
16990312	PCDHB13	1.46	0.064931	1.54	0.061204	1.67	0.044747	1.19	0.547753	1.465
16934896	RP5-1039K5.16	1.55	0.038614	1.67	0.003431	1.35	0.072748	1.32	0.75238	1.4725
17005871	HIST1H2BN	1.44	0.135394	1.54	0.13461	1.04	0.543722	1.89	0.026131	1.4775
16669698	RN7SKP88	1.31	0.124835	1.13	0.465352	1.82	0.076702	1.67	0.019996	1.4825
17060061	ASNS	2.17	0.081859	1.62	0.002209	1.06	0.219914	1.09	0.77995	1.485
16889450	RNU7-45P	1.61	0.630432	1.01	0.393013	2.04	0.028653	1.36	0.032817	1.505
16778413	TPTE2P5	1.42	0.003301	1.13	0.188359	1.95	0.011889	1.54	0.052148	1.51
16870802	ZNF708	1.76	0.000798	1.52	0.000412	1.33	0.43066	1.56	0.297827	1.5425
16684142	RNU7-45P	1.86	0.512074	1.08	0.488663	1.94	0.045273	1.33	0.161296	1.5525
16670141	GPR89A	2.02	0.030122	2.01	0.020566	1.16	0.003058	1.06	0.096316	1.5625
17016612	LINC00533	1.08	0.708359	1.38	0.537886	1.45	0.100416	2.36	0.031818	1.5675
17124892	LOC101930106	1.17	0.712194	1.82	0.338548	1.54	0.236424	1.74	0.048512	1.5675
16882183	TCF7L1-IT1	1.69	0.018883	1.51	0.074322	1.31	0.04628	1.8	0.02404	1.5775
16748498	MIR613	1.31	0.067184	1.24	0.383503	1.85	0.021376	1.92	0.028074	1.58
16686086	RNU6-870P	1.47	0.414477	1.09	0.659657	2.19	0.023115	1.58	0.087541	1.5825
16711380	RP11-445P17.8	1.35	0.659422	1.78	0.534744	1.72	0.045042	1.58	0.156573	1.6075
17056672	RNU6-1085P	1.88	0.00435	1.81	0.003635	1.45	0.146205	1.31	0.069626	1.6125
16983456	RNU6-1003P	1.24	0.031072	1.52	0.276883	2.11	0.006615	1.61	0.102182	1.62
16885575	CFC1B	1.68	0.081281	2.24	0.047787	1.12	0.390397	1.53	0.863639	1.6425
17118662	SNORD45C	2.3	0.050516	1.62	0.023822	1.59	0.049005	1.08	0.326681	1.6475
16797527	IGHV3-38	1.34	0.104174	1.02	0.714167	2.67	0.011433	1.62	0.05884	1.6625
16972420	MIR548T	2.25	0.048799	1.7	0.094869	1.51	0.333918	1.19	0.607666	1.6625
16669963	GPR89A	2.24	0.039019	2.23	0.02841	1.19	0.000339	1.09	0.258086	1.6875
16712732	RNU2-24P	1.08	0.770524	1.21	0.943695	1.84	0.230967	2.69	0.025058	1.705
16945993	PPP2R3A	2.19	0.020928	2.22	0.017434	1.27	0.00226	1.34	0.001127	1.755
17062702	RNU7-54P	1.18	0.727731	1.38	0.418981	1.92	0.049437	2.81	0.174062	1.8225
