# Supplementary material for: LncRNA PART1 Promotes Proliferation and Migration, Is Associated with Cancer Stem Cells, and Alters the miRNA Landscape in Triple-Negative Breast Cancer
Source: Cancers (Basel). 2021 May 27;13(11):2644. doi: 10.3390/cancers13112644 (PMC8198907; doi:10.3390/cancers13112644)
Supplement: Supplementary file 1 [file cancers-13-02644-s001.zip › File S3.xlsx]

## Sheet: HCC1806 - TargetScan Results
miRNA	Number of common mRNA targets with PART1	Common mRNA targets with PART1
miR-190a-3p	30	MEI4	GRAMD1B	DGKH	KCNH5	SMAD2	ZNF708	CDH10	NETO1	TBCK	ZFP69B	GAB1	MYO5A	KCNS2	MED6	C5AR2	HLCS	SYT1	TBCEL	DNM1L	USP32	HS6ST2	TBC1D2B	PPP2R3A	TMEM194A	ZBTB40	QPCT	SUPT3H	ACSL3	ROBO1	GPR125
miR-635	17	TBCK	GABRA3	EDDM3B	NR6A1	INCA1	HLCS	MEI4	MAP4	ZFP69B	KCNS2	SYT1	OVOL1	ZBTB40	TECPR2	MYO5A	SMAD2	QPCT
miR-129-5p	2	DGKH	SYT1
miR-373-3p	2	SMAD2	TBCEL
miR-429	7	SYT1	SMAD2	GAB1	DGKH	OSR1	MED6	TBCEL
miR-150-5p	1	GAB1
miR-143-3p	1	SLC39A11

## Sheet: HCC1395 - TargetScan Results
miRNA	Number of common mRNA targets with PART1	Common mRNA targets with PART1
miR-190a-3p	20	HOXD10	UGT2A1	CACNB4	IFNE	UGT2A1	SEMA3D	GPC6	GPRASP1	TAS2R30	HIST1H2BN	LRP1B	DEFB132	SH3D19	ZNF208	SLIT3	AC090616.2	BICC1	RASEF	SUPT3H	ARGFX
miR-635	10	AKR7L	C6orf222	SLIT3	CACNB4	HIST1H2BN	IFNE	FSCN3	GPC6	GDA	CMC1
miR-129-5p	3	CACNB4	GPC6	SLIT3
miR-373-3p	2	GPC6	BICC1
miR-429	3	LRP1B	BICC1	GPC6
miR-150-5p	0
miR-143-3p	0
