# Supplementary material for: LncRNA PART1 Promotes Proliferation and Migration, Is Associated with Cancer Stem Cells, and Alters the miRNA Landscape in Triple-Negative Breast Cancer
Source: Cancers (Basel). 2021 May 27;13(11):2644. doi: 10.3390/cancers13112644 (PMC8198907; doi:10.3390/cancers13112644)
Supplement: Supplementary file 1 [file cancers-13-02644-s001.zip › File S4.xlsx]

## Sheet: Supplemental 4
Transcript ID	Gene Name	miRNA Name(miRBase version)	miTG score
>ENST00000515734	ENSG00000152931(PART1)	hsa-miR-3529-3p	-21	0.999
5:2422-2440	8mer	0.048
5:2426-2451	9mer	0.022
5:2454-2469	8mer	0.016
5:2445-2460	8mer	0.015
5:2446-2457	8mer	0.013
5:741-767	6mer	0.003
>ENST00000515734	ENSG00000152931(PART1)	hsa-miR-6842-3p	-21	0.997
5:393-412	8mer	0.096
5:1950-1973	6mer	0.004
5:2178-2195	6mer	0.003
5:926-944	6mer	0.002
>ENST00000515734	ENSG00000152931(PART1)	hsa-miR-4797-3p	-21	0.996
5:176-199	8mer	0.089
5:372-396	6mer	0.007
5:936-962	6mer	0.002
5:800-818	6mer	0.002
5:1112-1138	6mer	0.002
>ENST00000515734	ENSG00000152931(PART1)	hsa-miR-4653-3p	-21	0.991
5:2040-2064	9mer	0.06
5:406-424	8mer+wobble	0.023
5:884-907	6mer	0.003
5:1015-1033	6mer	0.002
>ENST00000504876	ENSG00000152931(PART1)	hsa-miR-3680-3p	-21	0.991
5:5015-5029	9mer	0.043
5:5108-5130	8mer	0.02
5:5020-5046	7mer	0.011
5:1376-1394	7mer	0.009
5:5207-5220	6mer	0.004
5:3685-3703	6mer	0.002
>ENST00000515734	ENSG00000152931(PART1)	hsa-miR-6854-5p	-21	0.991
5:179-202	8mer	0.08
5:376-398	7mer	0.007
>ENST00000515734	ENSG00000152931(PART1)	hsa-miR-3065-5p	-21	0.99
5:2418-2439	8mer	0.031
5:2439-2449	8mer	0.021
5:913-931	8mer	0.012
5:2440-2458	6mer	0.006
5:2440-2452	6mer	0.006
5:2458-2467	6mer	0.005
5:2440-2455	6mer	0.005
>ENST00000504876	ENSG00000152931(PART1)	hsa-miR-6738-3p	-21	0.99
5:667-692	8mer	0.034
5:5248-5265	8mer	0.032
5:4516-4541	9mer	0.014
5:2446-2451	7mer	0.004
5:2249-2266	6mer	0.002
5:2500-2504	6mer	0.001
>ENST00000515734	ENSG00000152931(PART1)	hsa-miR-590-3p	-21	0.99
5:2544-2561	8mer	0.034
5:874-884	8mer	0.018
5:1542-1559	8mer	0.01
5:2521-2536	6mer	0.008
5:2286-2300	6mer	0.006
5:2386-2407	6mer	0.005
5:1811-1816	6mer	0.004
>ENST00000504876	ENSG00000152931(PART1)	hsa-miR-5001-3p	-21	0.988
5:5246-5265	8mer	0.042
5:667-692	8mer	0.021
5:4522-4540	8mer	0.014
5:3561-3588	8mer	0.002
5:2436-2450	6mer	0.002
5:2244-2266	6mer	0.002
>ENST00000515734	ENSG00000152931(PART1)	hsa-miR-488-5p	-21	0.988
5:505-515	8mer	0.04
5:2378-2388	8mer	0.032
5:1890-1912	7mer	0.005
5:565-589	7mer	0.005
>ENST00000504876	ENSG00000152931(PART1)	hsa-miR-6086	-21	0.986
5:4761-4780	8mer	0.042
5:618-645	8mer	0.022
5:329-355	7mer	0.012
5:2419-2439	6mer	0.002
5:3884-3911	6mer	0.001
5:3944-3958	6mer	0.001
>ENST00000515734	ENSG00000152931(PART1)	hsa-miR-676-3p	-21	0.986
5:247-265	9mer	0.072
5:552-579	7mer	0.008
>ENST00000515734	ENSG00000152931(PART1)	hsa-miR-545-5p	-21	0.982
5:181-198	9mer	0.073
5:1027-1049	6mer	0.002
5:1307-1332	6mer	0.002
>ENST00000506884	ENSG00000152931(PART1)	hsa-miR-4524a-3p	-21	0.982
5:2008-2023	8mer	0.064
5:1747-1773	7mer	0.008
5:1462-1479	6mer	0.004
>ENST00000515734	ENSG00000152931(PART1)	hsa-miR-4735-3p	-21	0.982
5:110-122	8mer	0.073
5:1828-1835	6mer	0.003
>ENST00000515734	ENSG00000152931(PART1)	hsa-miR-7856-5p	-21	0.981
5:102-126	8mer	0.032
5:192-206	7mer	0.017
5:2536-2558	7mer	0.016
5:2284-2303	6mer	0.006
5:2225-2239	6mer	0.004
>ENST00000504876	ENSG00000152931(PART1)	hsa-miR-4743-3p	-21	0.979
5:944-971	9mer	0.034
5:667-692	8mer+wobble	0.012
5:347-363	7mer	0.012
5:1469-1480	7mer	0.003
5:4983-5002	6mer	0.003
5:163-184	6mer	0.003
5:4841-4861	6mer	0.002
5:1331-1343	6mer	0.002
5:2499-2504	6mer	0.002
5:1347-1366	6mer	0.001
>ENST00000504876	ENSG00000152931(PART1)	hsa-miR-3191-5p	-21	0.978
5:41-48	8mer	0.055
5:4984-4990	7mer	0.009
5:866-870	6mer	0.006
5:4252-4260	6mer	0.002
5:2454-2473	6mer	0.001
>ENST00000504876	ENSG00000152931(PART1)	hsa-miR-5701	-21	0.977
5:5310-5316	8mer	0.036
5:5578-5593	6mer	0.01
5:4911-4916	7mer	0.005
5:4950-4968	6mer	0.004
5:4519-4533	7mer	0.004
5:2263-2278	8mer+wobble	0.003
5:777-795	6mer	0.003
5:4789-4808	6mer	0.003
5:3323-3334	6mer	0.002
5:4149-4168	6mer	0.002
>ENST00000504876	ENSG00000152931(PART1)	hsa-miR-450b-5p	-21	0.975
5:5032-5046	9mer	0.035
5:5015-5029	7mer	0.015
5:5110-5130	7mer	0.009
5:5195-5220	7mer	0.009
5:3690-3703	6mer	0.002
>ENST00000515734	ENSG00000152931(PART1)	hsa-miR-1207-5p	-21	0.973
5:44-64	8mer	0.065
5:2241-2259	6mer	0.004
>ENST00000504876	ENSG00000152931(PART1)	hsa-miR-3922-3p	-21	0.97
5:21-46	9mer	0.056
5:1320-1341	8mer	0.01
5:1905-1914	6mer	0.001
5:3694-3720	6mer	0.001
>ENST00000515734	ENSG00000152931(PART1)	hsa-miR-6747-3p	-21	0.968
5:308-321	9mer	0.058
5:317-330	6mer	0.004
5:2043-2053	6mer	0.004
>ENST00000515734	ENSG00000152931(PART1)	hsa-miR-18b-5p	-21	0.967
5:97-123	8mer	0.066
>ENST00000515734	ENSG00000152931(PART1)	hsa-miR-450b-3p	-21	0.967
5:1786-1802	9mer	0.066
>ENST00000515734	ENSG00000152931(PART1)	hsa-miR-4526	-21	0.967
5:231-253	7mer	0.027
5:1844-1857	8mer	0.023
5:2226-2246	7mer	0.013
5:261-286	6mer	0.003
>ENST00000506884	ENSG00000152931(PART1)	hsa-miR-488-5p	-21	0.963
5:78-88	8mer	0.054
5:138-162	7mer	0.009
5:715-731	6mer	0.002
>ENST00000515734	ENSG00000152931(PART1)	hsa-miR-18a-5p	-21	0.962
5:106-123	8mer	0.064
>ENST00000504876	ENSG00000152931(PART1)	hsa-miR-3977	-21	0.961
5:5596-5611	8mer	0.05
5:807-825	6mer	0.005
5:5389-5409	6mer	0.004
5:2901-2906	7mer	0.003
5:1684-1707	6mer	0.002
>ENST00000504876	ENSG00000152931(PART1)	hsa-miR-516a-3p	-21	0.959
5:813-825	9mer	0.034
>ENST00000504876	ENSG00000152931(PART1)	hsa-miR-516b-3p	-21	0.959
5:813-825	9mer	0.034
5:5395-5409	8mer	0.023
5:5395-5409	8mer	0.023
5:1694-1707	7mer	0.005
5:1694-1707	7mer	0.005
>ENST00000504876	ENSG00000152931(PART1)	hsa-miR-7162-5p	-21	0.958
5:812-825	9mer	0.035
5:5395-5409	8mer	0.022
5:1685-1707	7mer	0.005
>ENST00000515734	ENSG00000152931(PART1)	hsa-miR-4775	-21	0.958
5:2286-2301	7mer	0.015
5:2468-2483	7mer	0.013
5:2552-2562	7mer	0.013
5:175-190	6mer	0.012
5:1550-1559	7mer	0.006
5:1651-1669	6mer	0.003
>ENST00000515734	ENSG00000152931(PART1)	hsa-miR-7-1-3p	-21	0.958
5:2421-2439	7mer	0.015
5:2422-2449	7mer	0.013
5:910-930	8mer	0.007
5:2436-2452	6mer	0.007
5:2436-2458	6mer	0.006
5:2454-2467	6mer	0.006
5:2436-2455	6mer	0.005
5:1177-1190	6mer	0.003
>ENST00000504876	ENSG00000152931(PART1)	hsa-miR-6866-5p	-21	0.957
5:21-38	8mer	0.035
5:3478-3489	8mer	0.012
5:1660-1683	7mer	0.004
5:5544-5558	6mer	0.004
5:5498-5514	6mer	0.004
5:3016-3041	6mer	0.002
5:1769-1791	6mer	0.001
>ENST00000506884	ENSG00000152931(PART1)	hsa-miR-3922-3p	-21	0.956
5:88-113	9mer	0.053
5:1803-1829	7mer	0.008
>ENST00000515734	ENSG00000152931(PART1)	hsa-miR-335-5p	-21	0.954
5:2408-2416	8mer	0.03
5:2441-2464	8mer+wobble	0.016
5:234-238	6mer	0.01
5:89-96	6mer	0.004
>ENST00000515734	ENSG00000152931(PART1)	hsa-miR-7-2-3p	-21	0.95
5:2415-2439	7mer	0.014
5:2425-2449	7mer	0.011
5:924-930	8mer	0.007
5:2440-2452	6mer	0.006
5:2440-2458	6mer	0.006
5:2457-2467	6mer	0.006
5:2440-2455	6mer	0.005
5:1177-1190	6mer	0.003
>ENST00000515734	ENSG00000152931(PART1)	hsa-miR-1236-5p	-21	0.948
5:1961-1986	8mer	0.048
5:144-169	6mer	0.008
5:1210-1236	6mer	0.003
>ENST00000504876	ENSG00000152931(PART1)	hsa-miR-4666b	-21	0.945
5:5001-5027	8mer	0.044
5:1381-1393	6mer	0.004
5:5109-5128	6mer	0.004
5:3153-3177	7mer	0.003
5:4178-4192	6mer	0.002
>ENST00000515734	ENSG00000152931(PART1)	hsa-miR-4784	-21	0.943
5:401-427	7mer	0.057
>ENST00000515734	ENSG00000152931(PART1)	hsa-miR-6127	-21	0.941
5:151-173	8mer	0.056
>ENST00000504876	ENSG00000152931(PART1)	hsa-miR-5010-3p	-21	0.941
5:472-486	9mer	0.031
5:4920-4939	9mer	0.018
5:2302-2327	6mer	0.002
5:3635-3661	6mer	0.002
5:4481-4485	6mer	0.002
5:3667-3671	6mer	0.001
5:3646-3666	6mer	0.001
>ENST00000506884	ENSG00000152931(PART1)	hsa-miR-6504-5p	-21	0.94
5:1429-1445	9mer	0.029
5:1983-1999	7mer	0.008
5:86-113	6mer	0.007
5:723-743	8mer	0.006
5:1678-1696	7mer	0.005
>ENST00000515734	ENSG00000152931(PART1)	hsa-miR-3150b-3p	-21	0.938
5:406-427	7mer	0.055
>ENST00000515734	ENSG00000152931(PART1)	hsa-miR-6130	-21	0.938
5:158-173	8mer	0.055
>ENST00000515734	ENSG00000152931(PART1)	hsa-miR-4283	-21	0.938
5:2086-2092	8mer	0.055
>ENST00000506884	ENSG00000152931(PART1)	hsa-miR-3191-5p	-21	0.938
5:108-115	8mer	0.052
5:690-706	6mer	0.002
5:696-718	6mer	0.001
>ENST00000515734	ENSG00000152931(PART1)	hsa-miR-4722-3p	-21	0.935
5:2046-2052	8mer	0.023
5:308-330	8mer	0.019
5:308-320	6mer	0.008
5:674-690	6mer	0.003
5:1610-1628	6mer	0.002
>ENST00000515734	ENSG00000152931(PART1)	hsa-miR-6765-3p	-21	0.932
5:2048-2074	8mer	0.04
5:559-583	7mer	0.014
>ENST00000506884	ENSG00000152931(PART1)	hsa-miR-3064-5p	-21	0.932
5:1429-1445	9mer	0.027
5:1983-1999	7mer	0.008
5:97-113	6mer	0.007
5:722-743	8mer	0.006
5:1681-1696	7mer	0.005
>ENST00000515734	ENSG00000152931(PART1)	hsa-miR-4510	-21	0.93
5:157-173	8mer	0.053
>ENST00000515734	ENSG00000152931(PART1)	hsa-miR-1245b-3p	-21	0.93
5:113-138	8mer	0.048
5:1206-1216	7mer	0.005
>ENST00000504876	ENSG00000152931(PART1)	hsa-miR-548p	-21	0.93
5:5522-5541	8mer	0.021
5:313-335	7mer	0.016
5:5140-5161	7mer	0.009
5:5152-5177	6mer	0.002
5:3740-3761	6mer	0.002
5:3996-4017	6mer	0.002
>ENST00000515734	ENSG00000152931(PART1)	hsa-miR-6719-3p	-21	0.928
5:231-252	7mer	0.028
5:2225-2245	7mer	0.013
5:260-287	7mer	0.007
5:1849-1856	6mer	0.005
>ENST00000515734	ENSG00000152931(PART1)	hsa-miR-6129	-21	0.926
5:160-173	8mer	0.052
>ENST00000504876	ENSG00000152931(PART1)	hsa-miR-877-5p	-21	0.923
5:5536-5559	8mer	0.024
5:18-37	6mer	0.006
5:3466-3490	7mer	0.005
5:1666-1682	7mer	0.005
5:5501-5515	6mer	0.003
5:1965-1985	8mer+wobble	0.003
5:3025-3040	7mer	0.003
5:2542-2566	6mer	0.001
>ENST00000506884	ENSG00000152931(PART1)	hsa-miR-5011-5p	-21	0.92
5:1548-1563	8mer	0.02
5:1304-1318	8mer	0.015
5:1548-1561	7mer	0.012
5:1599-1625	6mer	0.003
>ENST00000504876	ENSG00000152931(PART1)	hsa-miR-1250-3p	-21	0.919
5:816-837	7mer	0.009
5:3077-3083	8mer	0.007
5:5593-5597	6mer	0.007
5:947-960	7mer	0.005
5:5121-5125	6mer	0.004
5:4993-5015	6mer	0.004
5:300-325	6mer	0.004
5:1412-1434	7mer	0.003
5:3827-3831	6mer	0.003
5:1129-1150	6mer	0.002
5:4474-4488	6mer	0.002
>ENST00000515734	ENSG00000152931(PART1)	hsa-miR-4676-5p	-21	0.919
5:432-446	8mer	0.044
5:1609-1635	6mer	0.004
5:1146-1159	7mer	0.002
>ENST00000504876	ENSG00000152931(PART1)	hsa-miR-670-3p	-21	0.918
5:2208-2224	8mer	0.024
5:4248-4274	8mer	0.012
5:5230-5251	6mer	0.004
5:2437-2456	6mer	0.003
5:891-907	6mer	0.002
5:1512-1523	6mer	0.002
5:899-915	6mer	0.001
5:4070-4094	6mer	0.001
>ENST00000506884	ENSG00000152931(PART1)	hsa-miR-6815-3p	-21	0.913
5:1570-1594	8mer	0.04
5:1195-1214	7mer	0.009
>ENST00000504876	ENSG00000152931(PART1)	hsa-miR-507	-21	0.91
5:5004-5029	7mer	0.014
5:5020-5046	7mer	0.012
5:5114-5130	7mer	0.01
5:1380-1394	6mer	0.004
5:3693-3703	7mer	0.004
5:5206-5220	6mer	0.004
>ENST00000504876	ENSG00000152931(PART1)	hsa-miR-5096	-21	0.909
5:5346-5370	8mer	0.038
5:732-759	6mer	0.004
5:1752-1772	6mer	0.002
5:2208-2234	6mer	0.002
5:4226-4242	6mer	0.002
>ENST00000504876	ENSG00000152931(PART1)	hsa-miR-6826-5p	-21	0.908
5:4822-4843	8mer	0.031
5:2045-2062	8mer	0.01
5:5220-5232	6mer	0.003
5:4493-4513	6mer	0.002
5:3240-3260	6mer	0.001
>ENST00000504876	ENSG00000152931(PART1)	hsa-miR-3150b-3p	-21	0.908
5:4795-4817	8mer	0.044
5:3945-3960	6mer	0.002
5:1879-1900	6mer	0.001
>ENST00000515734	ENSG00000152931(PART1)	hsa-miR-628-5p	-21	0.905
5:1836-1858	8mer	0.025
5:2231-2247	8mer	0.023
>ENST00000504876	ENSG00000152931(PART1)	hsa-miR-185-5p	-21	0.903
5:2689-2703	9mer	0.03
5:2734-2753	9mer	0.007
5:1020-1041	6mer	0.002
5:3871-3882	7mer	0.002
5:595-613	6mer	0.002
5:1653-1668	6mer	0.002
5:4724-4743	6mer	0.001
>ENST00000506884	ENSG00000152931(PART1)	hsa-miR-938	-21	0.902
5:1162-1177	9mer	0.028
5:252-261	7mer	0.009
5:13-36	6mer	0.009
>ENST00000504876	ENSG00000152931(PART1)	hsa-miR-4802-5p	-21	0.9
5:4763-4783	9mer	0.038
5:3937-3964	7mer	0.005
5:2742-2755	7mer	0.003
5:2547-2560	6mer	0.001
>ENST00000515734	ENSG00000152931(PART1)	hsa-miR-30a-3p	-21	0.9
5:2197-2218	8mer	0.031
5:441-460	7mer	0.01
5:1387-1408	7mer	0.006
>ENST00000504876	ENSG00000152931(PART1)	hsa-miR-1226-5p	-21	0.898
5:2770-2795	9mer	0.025
5:4459-4482	9mer	0.015
5:911-933	7mer	0.002
5:1150-1159	6mer	0.002
5:1898-1920	6mer	0.001
>ENST00000515734	ENSG00000152931(PART1)	hsa-miR-4743-3p	-21	0.898
5:250-268	8mer	0.041
5:989-998	6mer	0.003
5:657-678	6mer	0.002
>ENST00000504876	ENSG00000152931(PART1)	hsa-miR-153-5p	-21	0.897
5:4990-5016	7mer	0.009
5:3817-3832	9mer	0.008
5:1127-1150	7mer	0.006
5:812-838	7mer	0.004
5:5101-5125	6mer	0.004
5:808-830	6mer	0.004
5:934-959	6mer	0.003
5:421-447	6mer	0.003
5:1412-1433	6mer	0.002
5:3060-3082	6mer	0.002
>ENST00000504876	ENSG00000152931(PART1)	hsa-miR-320e	-21	0.894
5:43-61	6mer	0.01
5:4733-4747	7mer	0.008
5:2374-2390	7mer	0.007
5:112-136	8mer+wobble	0.005
5:1270-1291	7mer	0.004
5:2172-2189	6mer	0.003
5:792-802	6mer	0.002
5:1091-1114	6mer	0.002
5:1527-1536	6mer	0.002
5:3955-3971	6mer	0.001
5:1748-1766	8mer+mismatch	0.001
>ENST00000504876	ENSG00000152931(PART1)	hsa-miR-6774-5p	-21	0.892
5:358-381	9mer	0.037
5:2967-2989	6mer	0.002
5:4282-4309	6mer	0.002
5:3675-3697	6mer	0.001
5:1652-1671	6mer	0.001
5:2012-2035	7mer	0.001
>ENST00000504876	ENSG00000152931(PART1)	hsa-miR-330-5p	-21	0.89
5:32-48	7mer	0.037
5:850-870	6mer	0.004
5:4971-4989	6mer	0.004
>ENST00000515734	ENSG00000152931(PART1)	hsa-miR-508-3p	-21	0.888
5:140-166	8mer	0.037
5:393-415	6mer	0.008
>ENST00000506884	ENSG00000152931(PART1)	hsa-miR-7974	-21	0.887
5:1766-1790	8mer	0.037
5:1422-1442	6mer	0.003
5:947-972	6mer	0.002
5:1824-1845	6mer	0.002
>ENST00000506884	ENSG00000152931(PART1)	hsa-miR-5006-3p	-21	0.886
5:950-965	9mer	0.025
5:1990-2003	7mer	0.014
5:149-166	6mer	0.004
5:1475-1493	6mer	0.002
>ENST00000504876	ENSG00000152931(PART1)	hsa-miR-6833-3p	-21	0.885
5:41-50	7mer	0.037
5:813-834	6mer	0.003
5:867-871	6mer	0.002
5:2110-2133	6mer	0.002
>ENST00000506884	ENSG00000152931(PART1)	hsa-miR-1976	-21	0.883
5:1908-1933	8mer	0.021
5:1786-1813	9mer	0.015
5:376-395	6mer	0.004
5:1056-1081	7mer	0.003
5:1073-1092	6mer	0.001
>ENST00000504876	ENSG00000152931(PART1)	hsa-miR-4778-5p	-21	0.883
5:4837-4862	8mer	0.013
5:4998-5003	7mer	0.009
5:2245-2267	8mer+wobble	0.007
5:296-319	6mer	0.005
5:501-518	6mer	0.004
5:1399-1422	6mer	0.003
5:3545-3568	6mer	0.002
5:2333-2357	6mer	0.001
>ENST00000515734	ENSG00000152931(PART1)	hsa-miR-4765	-21	0.88
5:158-169	8mer	0.02
5:1964-1986	7mer	0.02
5:1212-1236	6mer	0.003
>ENST00000506884	ENSG00000152931(PART1)	hsa-miR-3144-3p	-21	0.879
5:1728-1747	7mer	0.019
5:2052-2061	7mer	0.014
5:342-359	6mer	0.005
5:1287-1300	6mer	0.003
5:1302-1316	6mer	0.002
>ENST00000504876	ENSG00000152931(PART1)	hsa-miR-4482-3p	-21	0.876
5:1334-1349	9mer	0.03
5:3053-3079	7mer	0.008
5:5185-5202	6mer	0.003
5:2824-2850	6mer	0.002
>ENST00000504876	ENSG00000152931(PART1)	hsa-miR-518c-5p	-21	0.875
5:21-48	7mer	0.035
5:846-870	6mer	0.004
5:4977-4989	6mer	0.004
>ENST00000515734	ENSG00000152931(PART1)	hsa-miR-30e-3p	-21	0.875
5:2207-2218	8mer	0.027
5:441-460	7mer	0.01
5:1387-1408	7mer	0.006
>ENST00000515734	ENSG00000152931(PART1)	hsa-miR-708-5p	-21	0.875
5:406-425	7mer	0.039
5:858-875	6mer	0.003
>ENST00000515734	ENSG00000152931(PART1)	hsa-miR-30d-3p	-21	0.875
5:2192-2218	8mer	0.026
5:434-460	7mer	0.01
5:1387-1408	7mer	0.006
>ENST00000504876	ENSG00000152931(PART1)	hsa-miR-3125	-21	0.873
5:1663-1682	8mer	0.009
5:5541-5558	7mer	0.009
5:3029-3040	8mer	0.006
5:5502-5514	6mer	0.005
5:3184-3204	8mer	0.003
5:3957-3975	8mer+wobble	0.003
5:5414-5439	6mer	0.003
5:326-345	6mer	0.002
5:3462-3489	6mer	0.001
>ENST00000504876	ENSG00000152931(PART1)	hsa-miR-552-5p	-21	0.872
5:5258-5282	8mer	0.042
>ENST00000504876	ENSG00000152931(PART1)	hsa-miR-2392	-21	0.872
5:607-630	7mer	0.017
5:327-342	7mer	0.011
5:1469-1488	7mer	0.005
5:847-851	6mer	0.003
5:4850-4866	6mer	0.003
5:3444-3463	7mer	0.002
5:2623-2642	8mer+wobble	0.002
>ENST00000515734	ENSG00000152931(PART1)	hsa-miR-1200	-21	0.871
5:1808-1823	8mer	0.028
5:200-220	6mer	0.012
5:1590-1613	6mer	0.002
>ENST00000504876	ENSG00000152931(PART1)	hsa-miR-361-3p	-21	0.87
5:4418-4435	8mer	0.039
5:763-787	6mer	0.002
5:866-891	6mer	0.001
>ENST00000504876	ENSG00000152931(PART1)	hsa-miR-1827	-21	0.87
5:3278-3290	9mer	0.012
5:2563-2572	8mer	0.008
5:3179-3197	8mer	0.008
5:4120-4147	7mer	0.007
5:17-35	6mer	0.006
5:2064-2081	7mer	0.002
>ENST00000515734	ENSG00000152931(PART1)	hsa-miR-3191-5p	-21	0.87
5:535-542	8mer	0.039
5:789-794	6mer	0.003
>ENST00000506884	ENSG00000152931(PART1)	hsa-miR-5584-3p	-21	0.869
5:580-597	8mer	0.039
5:485-512	6mer	0.003
>ENST00000515734	ENSG00000152931(PART1)	hsa-miR-6727-3p	-21	0.869
5:308-321	7mer	0.019
5:308-330	7mer	0.01
5:2047-2053	7mer	0.01
5:686-690	6mer	0.003
>ENST00000504876	ENSG00000152931(PART1)	hsa-miR-8070	-21	0.869
5:41-57	7mer	0.015
5:5071-5094	7mer	0.01
5:2056-2068	7mer	0.003
5:2181-2196	7mer	0.003
5:2367-2382	7mer	0.002
5:1452-1462	6mer	0.002
5:2785-2797	6mer	0.002
5:3818-3839	6mer	0.002
5:3025-3050	6mer	0.001
5:1879-1893	6mer	0.001
5:3416-3438	6mer	0.001
>ENST00000515734	ENSG00000152931(PART1)	hsa-miR-2355-5p	-21	0.868
5:578-591	8mer	0.026
5:1341-1354	9mer	0.016
>ENST00000504876	ENSG00000152931(PART1)	hsa-miR-6817-3p	-21	0.868
5:4984-4991	9mer	0.035
5:4250-4261	7mer	0.004
5:2458-2472	7mer	0.002
5:2458-2473	6mer	0.001
>ENST00000515734	ENSG00000152931(PART1)	hsa-miR-2054	-21	0.867
5:2533-2551	8mer	0.039
5:1139-1144	6mer	0.002
>ENST00000504876	ENSG00000152931(PART1)	hsa-miR-4693-3p	-21	0.867
5:3331-3353	8mer	0.025
5:695-711	8mer	0.011
5:4546-4554	6mer	0.002
5:3964-3977	6mer	0.002
5:4394-4419	6mer	0.001
>ENST00000504876	ENSG00000152931(PART1)	hsa-miR-4644	-21	0.865
5:2684-2703	8mer	0.024
5:2733-2753	8mer	0.005
5:3861-3882	8mer	0.004
5:1037-1041	6mer	0.003
5:590-613	6mer	0.002
5:1647-1668	6mer	0.002
5:4725-4743	6mer	0.001
>ENST00000515734	ENSG00000152931(PART1)	hsa-miR-4763-3p	-21	0.864
5:39-63	7mer	0.03
5:2241-2260	7mer	0.009
5:704-721	6mer	0.003
>ENST00000504876	ENSG00000152931(PART1)	hsa-miR-2355-5p	-21	0.864
5:84-97	8mer	0.036
5:768-788	6mer	0.005
>ENST00000515734	ENSG00000152931(PART1)	hsa-miR-3675-5p	-21	0.863
5:2069-2093	8mer	0.039
5:985-1007	6mer	0.002
>ENST00000506884	ENSG00000152931(PART1)	hsa-miR-619-5p	-21	0.863
5:1891-1910	9mer	0.028
5:1771-1789	8mer+mismatch	0.003
5:552-575	6mer	0.003
5:477-501	7mer	0.003
5:232-248	6mer	0.003
5:793-809	6mer	0.002
>ENST00000504876	ENSG00000152931(PART1)	hsa-miR-3657	-21	0.863
5:4925-4936	8mer	0.041
>ENST00000515734	ENSG00000152931(PART1)	hsa-miR-4633-3p	-21	0.861
5:409-425	8mer	0.037
5:386-400	6mer	0.004
>ENST00000515734	ENSG00000152931(PART1)	hsa-miR-4724-5p	-21	0.86
5:129-148	7mer	0.035
5:2348-2367	8mer+mismatch	0.005
>ENST00000506884	ENSG00000152931(PART1)	hsa-miR-4446-5p	-21	0.86
5:1992-2003	8mer	0.015
5:943-965	7mer	0.01
5:126-145	6mer	0.005
5:140-166	6mer	0.004
5:1488-1493	6mer	0.003
5:1166-1185	6mer	0.002
5:1046-1072	6mer	0.002
>ENST00000506884	ENSG00000152931(PART1)	hsa-miR-3176	-21	0.859
5:86-112	7mer	0.032
5:1808-1828	7mer	0.008
>ENST00000504876	ENSG00000152931(PART1)	hsa-miR-6089	-21	0.858
5:5146-5170	7mer	0.022
5:5491-5508	8mer	0.015
5:269-293	6mer	0.002
5:2555-2573	6mer	0.001
>ENST00000515734	ENSG00000152931(PART1)	hsa-miR-3922-3p	-21	0.858
5:515-540	9mer	0.04
>ENST00000506884	ENSG00000152931(PART1)	hsa-miR-6745	-21	0.857
5:419-445	8mer	0.02
5:1634-1649	7mer	0.011
5:670-689	7mer	0.006
5:781-805	7mer	0.002
5:766-783	6mer	0.001
>ENST00000506884	ENSG00000152931(PART1)	hsa-miR-6833-3p	-21	0.857
5:108-117	7mer	0.035
5:1393-1401	6mer	0.003
5:1105-1127	6mer	0.002
>ENST00000504876	ENSG00000152931(PART1)	hsa-miR-4659b-5p	-21	0.857
5:509-527	8mer	0.027
5:126-141	6mer	0.004
5:5171-5187	6mer	0.004
5:299-308	6mer	0.003
5:3115-3125	6mer	0.002
>ENST00000504876	ENSG00000152931(PART1)	hsa-miR-105-5p	-21	0.856
5:4428-4448	9mer	0.031
5:4006-4031	7mer	0.005
5:2243-2261	6mer	0.002
5:1889-1909	6mer	0.001
5:4048-4060	6mer	0.001
>ENST00000506884	ENSG00000152931(PART1)	hsa-miR-4755-5p	-21	0.856
5:945-965	8mer	0.021
5:1992-2003	7mer	0.014
5:146-166	6mer	0.003
5:1476-1493	6mer	0.002
>ENST00000504876	ENSG00000152931(PART1)	hsa-miR-3176	-21	0.854
5:19-45	7mer	0.034
5:1319-1340	7mer	0.005
5:3697-3719	6mer	0.001
>ENST00000506884	ENSG00000152931(PART1)	hsa-miR-30d-3p	-21	0.852
5:1856-1878	7mer	0.019
5:7-33	7mer	0.013
5:1341-1358	6mer	0.004
5:1114-1133	6mer	0.003
>ENST00000504876	ENSG00000152931(PART1)	hsa-miR-4659b-3p	-21	0.851
5:2340-2355	8mer	0.012
5:498-516	6mer	0.006
5:5253-5275	6mer	0.006
5:903-910	7mer	0.006
5:4446-4470	6mer	0.003
5:1490-1502	7mer	0.003
5:4538-4544	7mer	0.002
5:958-983	6mer	0.002
>ENST00000504876	ENSG00000152931(PART1)	hsa-miR-4679	-21	0.85
5:44-58	7mer	0.02
5:1885-1894	8mer	0.007
5:4936-4952	6mer	0.004
5:4985-5001	6mer	0.003
5:792-808	6mer	0.003
5:3037-3051	7mer	0.002
>ENST00000504876	ENSG00000152931(PART1)	hsa-miR-520h	-21	0.85
5:13-31	7mer	0.012
5:312-332	7mer	0.009
5:1635-1650	7mer	0.004
5:272-288	7mer	0.004
5:5142-5158	6mer	0.003
5:3742-3759	6mer	0.003
5:4099-4119	6mer	0.003
5:3397-3414	8mer	0.002
>ENST00000506884	ENSG00000152931(PART1)	hsa-miR-30e-3p	-21	0.849
5:1857-1878	7mer	0.019
5:14-33	7mer	0.013
5:1337-1358	6mer	0.004
5:1117-1133	6mer	0.003
>ENST00000515734	ENSG00000152931(PART1)	hsa-miR-6866-5p	-21	0.849
5:515-532	8mer	0.025
5:2098-2116	8mer	0.01
5:942-955	6mer	0.004
>ENST00000515734	ENSG00000152931(PART1)	hsa-miR-511-3p	-21	0.848
5:493-500	9mer	0.019
5:89-109	7mer	0.016
5:1242-1247	7mer	0.003
>ENST00000506884	ENSG00000152931(PART1)	hsa-miR-30a-3p	-21	0.848
5:1857-1878	7mer	0.019
5:14-33	7mer	0.013
5:1341-1358	6mer	0.004
5:1114-1133	6mer	0.003
>ENST00000515734	ENSG00000152931(PART1)	hsa-miR-7150	-21	0.848
5:48-65	9mer	0.036
5:2089-2110	6mer	0.002
>ENST00000515734	ENSG00000152931(PART1)	hsa-miR-7852-3p	-21	0.847
5:281-306	8mer	0.036
5:1512-1527	6mer	0.003
>ENST00000504876	ENSG00000152931(PART1)	hsa-miR-520g-3p	-21	0.846
5:12-31	7mer	0.012
5:312-332	7mer	0.009
5:1631-1650	7mer	0.004
5:272-288	7mer	0.004
5:5138-5158	6mer	0.003
5:3742-3759	6mer	0.003
5:4101-4119	6mer	0.002
5:3393-3414	8mer	0.002
>ENST00000504876	ENSG00000152931(PART1)	hsa-miR-5190	-21	0.846
5:728-745	8mer	0.031
5:733-755	6mer	0.003
5:4702-4727	6mer	0.002
5:3268-3285	6mer	0.002
>ENST00000515734	ENSG00000152931(PART1)	hsa-miR-6500-5p	-21	0.845
5:415-425	8mer	0.035
5:375-400	6mer	0.004
>ENST00000504876	ENSG00000152931(PART1)	hsa-miR-3662	-21	0.844
5:521-547	7mer	0.011
5:2988-3007	7mer	0.006
5:3877-3897	7mer	0.005
5:2672-2697	7mer	0.004
5:4875-4902	6mer	0.003
5:1352-1375	6mer	0.002
5:2421-2444	7mer	0.002
5:1730-1751	6mer	0.002
5:4160-4184	6mer	0.002
>ENST00000504876	ENSG00000152931(PART1)	hsa-miR-4659a-3p	-21	0.84
5:2341-2355	8mer	0.011
5:505-516	6mer	0.006
5:903-910	7mer	0.006
5:5256-5275	6mer	0.005
5:4451-4470	6mer	0.003
5:1492-1502	7mer	0.003
5:4538-4544	7mer	0.002
5:958-983	6mer	0.002
>ENST00000504876	ENSG00000152931(PART1)	hsa-miR-4652-3p	-21	0.84
5:357-362	7mer	0.014
5:1354-1367	8mer	0.008
5:946-970	6mer	0.005
5:4987-5003	6mer	0.004
5:669-693	6mer	0.004
5:2499-2503	6mer	0.002
5:1587-1613	6mer	0.001
>ENST00000504876	ENSG00000152931(PART1)	hsa-miR-4306	-21	0.839
5:2689-2703	9mer	0.019
5:2739-2753	9mer	0.006
5:1030-1041	6mer	0.003
5:599-613	6mer	0.002
5:3871-3882	7mer	0.002
5:2565-2591	8mer+mismatch	0.002
5:1653-1668	6mer	0.002
5:4724-4743	6mer	0.001
>ENST00000506884	ENSG00000152931(PART1)	hsa-miR-4743-3p	-21	0.838
5:896-910	9mer	0.021
5:303-316	7mer	0.01
5:230-251	6mer	0.003
5:680-693	6mer	0.002
5:1174-1191	6mer	0.002
>ENST00000504876	ENSG00000152931(PART1)	hsa-miR-664b-3p	-21	0.838
5:809-831	8mer	0.016
5:5603-5608	6mer	0.007
5:4990-5017	6mer	0.004
5:816-839	7mer	0.003
5:1618-1637	6mer	0.003
5:3828-3832	6mer	0.003
5:2262-2270	6mer	0.002
>ENST00000504876	ENSG00000152931(PART1)	hsa-miR-7843-5p	-21	0.836
5:4466-4480	9mer	0.02
5:903-927	9mer	0.009
5:2780-2793	7mer	0.005
5:3869-3877	8mer	0.004
>ENST00000504876	ENSG00000152931(PART1)	hsa-miR-5002-3p	-21	0.835
5:5132-5142	8mer	0.033
5:4052-4056	6mer	0.003
5:1863-1867	6mer	0.002
>ENST00000506884	ENSG00000152931(PART1)	hsa-miR-1825	-21	0.834
5:30-45	8mer	0.034
5:507-514	6mer	0.003
>ENST00000515734	ENSG00000152931(PART1)	hsa-miR-433-3p	-21	0.834
5:2305-2311	8mer	0.023
5:1291-1312	8mer	0.006
5:1965-1989	6mer	0.005
5:1234-1253	7mer	0.003
>ENST00000504876	ENSG00000152931(PART1)	hsa-miR-4663	-21	0.834
5:1046-1061	8mer	0.017
5:127-149	7mer	0.004
5:397-423	6mer	0.004
5:695-713	6mer	0.003
5:1267-1289	6mer	0.003
5:1908-1932	6mer	0.002
5:1527-1535	6mer	0.002
5:776-801	6mer	0.002
>ENST00000504876	ENSG00000152931(PART1)	hsa-miR-1277-5p	-21	0.831
5:519-534	8mer	0.014
5:4820-4835	9mer	0.01
5:4048-4067	7mer	0.005
5:3340-3358	6mer	0.003
5:3830-3847	7mer	0.003
5:4173-4197	6mer	0.001
>ENST00000506884	ENSG00000152931(PART1)	hsa-miR-518c-5p	-21	0.831
5:88-115	7mer	0.033
5:689-706	6mer	0.002
5:732-745	6mer	0.001
>ENST00000504876	ENSG00000152931(PART1)	hsa-miR-5571-5p	-21	0.83
5:305-319	7mer	0.011
5:1404-1422	8mer	0.009
5:500-519	7mer	0.006
5:5037-5041	6mer	0.006
5:3548-3569	8mer	0.003
5:5135-5151	6mer	0.002
>ENST00000515734	ENSG00000152931(PART1)	hsa-miR-4689	-21	0.829
5:405-427	7mer	0.032
5:2380-2403	6mer	0.004
>ENST00000506884	ENSG00000152931(PART1)	hsa-miR-452-3p	-21	0.829
5:40-59	8mer	0.028
5:1430-1449	8mer	0.009
>ENST00000506884	ENSG00000152931(PART1)	hsa-miR-4288	-21	0.829
5:526-542	9mer	0.035
5:962-985	6mer	0.002
>ENST00000504876	ENSG00000152931(PART1)	hsa-miR-3190-3p	-21	0.828
5:5436-5456	8mer	0.024
5:4791-4805	7mer	0.011
5:2475-2500	6mer	0.001
>ENST00000515734	ENSG00000152931(PART1)	hsa-miR-5700	-21	0.828
5:291-313	8mer	0.036
>ENST00000506884	ENSG00000152931(PART1)	hsa-miR-2355-5p	-21	0.827
5:151-164	8mer	0.035
5:697-712	6mer	0.002
>ENST00000515734	ENSG00000152931(PART1)	hsa-miR-3139	-21	0.827
5:407-425	7mer	0.032
5:1006-1025	6mer	0.002
5:1273-1293	6mer	0.002
>ENST00000506884	ENSG00000152931(PART1)	hsa-miR-363-5p	-21	0.827
5:1625-1649	8mer	0.02
5:420-445	7mer	0.009
5:684-688	6mer	0.003
5:788-805	7mer	0.002
5:758-783	6mer	0.002
>ENST00000515734	ENSG00000152931(PART1)	hsa-miR-4738-3p	-21	0.826
5:2149-2175	8mer	0.026
5:2128-2149	8mer	0.01
>ENST00000504876	ENSG00000152931(PART1)	hsa-miR-6839-3p	-21	0.825
5:344-369	8mer	0.022
5:3360-3366	8mer	0.008
5:475-496	6mer	0.004
5:2756-2760	6mer	0.002
>ENST00000515734	ENSG00000152931(PART1)	hsa-miR-5579-3p	-21	0.823
5:1927-1942	8mer	0.036
>ENST00000515734	ENSG00000152931(PART1)	hsa-miR-1249-5p	-21	0.823
5:157-174	8mer	0.028
5:1272-1292	7mer	0.008
>ENST00000504876	ENSG00000152931(PART1)	hsa-miR-548ah-5p	-21	0.823
5:13-30	8mer	0.017
5:307-331	7mer	0.006
5:4758-4772	6mer	0.003
5:262-287	6mer	0.002
5:393-418	6mer	0.002
5:1632-1649	6mer	0.002
5:3725-3746	6mer	0.002
5:3390-3413	6mer	0.001
>ENST00000504876	ENSG00000152931(PART1)	hsa-miR-4784	-21	0.822
5:4800-4817	8mer	0.032
5:3943-3960	6mer	0.002
5:1879-1900	6mer	0.001
>ENST00000515734	ENSG00000152931(PART1)	hsa-miR-6858-5p	-21	0.821
5:405-428	7mer	0.034
5:1377-1401	6mer	0.002
>ENST00000504876	ENSG00000152931(PART1)	hsa-miR-6788-5p	-21	0.82
5:3969-3985	8mer	0.019
5:5393-5418	6mer	0.005
5:155-181	6mer	0.003
5:590-606	6mer	0.003
5:3256-3272	6mer	0.002
5:2555-2575	6mer	0.002
5:1739-1763	6mer	0.001
5:3527-3540	6mer	0.001
5:3394-3407	6mer	0.001
>ENST00000515734	ENSG00000152931(PART1)	hsa-miR-525-5p	-21	0.818
5:433-450	7mer	0.019
5:500-516	6mer	0.007
5:2378-2389	6mer	0.005
5:590-611	6mer	0.004
>ENST00000506884	ENSG00000152931(PART1)	hsa-miR-330-5p	-21	0.816
5:99-115	7mer	0.035
>ENST00000515734	ENSG00000152931(PART1)	hsa-miR-520a-5p	-21	0.816
5:433-450	7mer	0.018
5:506-516	6mer	0.007
5:2379-2389	6mer	0.005
5:590-611	6mer	0.005
>ENST00000515734	ENSG00000152931(PART1)	hsa-miR-448	-21	0.816
5:297-310	8mer	0.024
5:219-246	6mer	0.011
>ENST00000504876	ENSG00000152931(PART1)	hsa-miR-22-3p	-21	0.815
5:44-61	6mer	0.013
5:5277-5294	6mer	0.006
5:1266-1290	6mer	0.004
5:83-107	6mer	0.004
5:4724-4747	6mer	0.002
5:778-802	6mer	0.002
5:2370-2390	6mer	0.002
5:1532-1536	6mer	0.002
>ENST00000515734	ENSG00000152931(PART1)	hsa-miR-28-5p	-21	0.814
5:410-425	7mer	0.031
5:853-875	6mer	0.004
>ENST00000504876	ENSG00000152931(PART1)	hsa-miR-4422	-21	0.813
5:5221-5238	8mer	0.032
5:1674-1693	7mer	0.002
>ENST00000504876	ENSG00000152931(PART1)	hsa-miR-4694-5p	-21	0.813
5:239-259	8mer	0.015
5:2262-2283	9mer	0.011
5:1213-1231	7mer	0.004
5:3796-3800	6mer	0.002
5:2904-2924	6mer	0.002
5:3507-3530	6mer	0.001
>ENST00000515734	ENSG00000152931(PART1)	hsa-miR-4517	-21	0.812
5:2494-2515	8mer	0.027
5:1734-1760	8mer	0.007
>ENST00000504876	ENSG00000152931(PART1)	hsa-miR-6880-5p	-21	0.812
5:627-649	9mer	0.022
5:5431-5458	7mer	0.007
5:5040-5065	6mer	0.004
5:2602-2625	6mer	0.002
>ENST00000504876	ENSG00000152931(PART1)	hsa-miR-627-3p	-21	0.812
5:975-986	8mer	0.015
5:643-655	7mer	0.009
5:67-81	6mer	0.004
5:662-677	6mer	0.002
5:1441-1453	6mer	0.002
5:2892-2901	6mer	0.001
5:3797-3806	6mer	0.001
>ENST00000504876	ENSG00000152931(PART1)	hsa-miR-3190-5p	-21	0.811
5:21-46	7mer	0.028
5:1320-1341	7mer	0.004
5:3708-3720	7mer	0.002
>ENST00000504876	ENSG00000152931(PART1)	hsa-miR-3609	-21	0.811
5:12-31	9mer	0.013
5:309-332	8mer	0.01
5:1638-1650	7mer	0.003
5:5136-5158	6mer	0.003
5:266-288	7mer	0.003
5:3392-3414	7mer	0.002
>ENST00000504876	ENSG00000152931(PART1)	hsa-miR-1976	-21	0.811
5:294-315	7mer	0.02
5:3548-3564	8mer	0.008
5:438-458	6mer	0.003
5:1532-1555	6mer	0.002
5:881-904	6mer	0.002
>ENST00000504876	ENSG00000152931(PART1)	hsa-miR-6080	-21	0.81
5:5343-5352	7mer	0.017
5:5439-5462	6mer	0.007
5:4917-4930	7mer	0.004
5:933-947	6mer	0.002
5:685-699	6mer	0.002
5:2128-2142	7mer	0.002
>ENST00000504876	ENSG00000152931(PART1)	hsa-miR-557	-21	0.81
5:5016-5028	6mer	0.007
5:5021-5045	6mer	0.006
5:5199-5219	6mer	0.005
5:5113-5129	6mer	0.005
5:3680-3702	7mer	0.004
5:1380-1395	6mer	0.003
5:191-209	6mer	0.003
5:2955-2978	6mer	0.002
>ENST00000504876	ENSG00000152931(PART1)	hsa-miR-6888-5p	-21	0.808
5:4791-4816	7mer	0.015
5:410-432	7mer	0.009
5:5156-5172	6mer	0.006
5:589-615	7mer	0.003
5:4560-4585	6mer	0.001
>ENST00000504876	ENSG00000152931(PART1)	hsa-miR-4729	-21	0.807
5:5571-5596	7mer	0.018
5:421-447	7mer	0.009
5:807-830	6mer	0.004
5:3088-3109	6mer	0.002
5:3807-3832	6mer	0.001
>ENST00000506884	ENSG00000152931(PART1)	hsa-miR-3135b	-21	0.806
5:1980-1996	8mer	0.026
5:1817-1844	6mer	0.004
5:720-740	7mer	0.003
5:479-502	6mer	0.002
>ENST00000506884	ENSG00000152931(PART1)	hsa-miR-190a-3p	-21	0.806
5:1548-1565	7mer	0.011
5:1548-1561	7mer	0.011
5:1548-1563	7mer	0.008
5:1302-1317	6mer	0.004
>ENST00000506884	ENSG00000152931(PART1)	hsa-miR-3190-5p	-21	0.805
5:88-113	7mer	0.027
5:1810-1829	6mer	0.003
5:1423-1445	6mer	0.003
5:717-743	6mer	0.001
>ENST00000504876	ENSG00000152931(PART1)	hsa-miR-335-3p	-21	0.805
5:40-52	6mer	0.01
5:361-365	6mer	0.007
5:4235-4244	7mer	0.005
5:559-563	6mer	0.004
5:649-675	6mer	0.003
5:947-973	6mer	0.003
5:1116-1137	6mer	0.002
>ENST00000504876	ENSG00000152931(PART1)	hsa-miR-196b-5p	-21	0.805
5:2036-2058	8mer	0.013
5:2653-2673	8mer	0.007
5:2274-2288	7mer	0.005
5:3221-3244	7mer	0.002
5:4022-4043	6mer	0.002
5:1839-1852	6mer	0.002
5:2080-2107	7mer	0.002
>ENST00000515734	ENSG00000152931(PART1)	hsa-miR-3180-5p	-21	0.804
5:512-517	7mer	0.011
5:443-451	7mer	0.011
5:27-53	6mer	0.008
5:456-473	6mer	0.003
5:1076-1094	6mer	0.002
>ENST00000504876	ENSG00000152931(PART1)	hsa-miR-4428	-21	0.804
5:417-433	8mer	0.022
5:43-66	6mer	0.004
5:5152-5172	6mer	0.004
5:592-615	7mer	0.003
5:1067-1094	6mer	0.001
>ENST00000506884	ENSG00000152931(PART1)	hsa-miR-6764-3p	-21	0.803
5:97-115	7mer	0.031
5:723-745	6mer	0.002
>ENST00000515734	ENSG00000152931(PART1)	hsa-miR-3613-3p	-21	0.802
5:2422-2437	8mer	0.02
5:2425-2447	6mer	0.005
5:986-991	7mer	0.004
5:1178-1189	6mer	0.002
5:1087-1110	6mer	0.002
>ENST00000515734	ENSG00000152931(PART1)	hsa-miR-5009-3p	-21	0.801
5:241-262	8mer	0.033
>ENST00000504876	ENSG00000152931(PART1)	hsa-miR-6873-3p	-21	0.801
5:4985-4991	8mer	0.013
5:38-49	6mer	0.01
5:867-871	6mer	0.004
5:4253-4261	7mer	0.004
5:2448-2473	7mer	0.003
>ENST00000504876	ENSG00000152931(PART1)	hsa-miR-6764-3p	-21	0.799
5:30-48	7mer	0.033
>ENST00000515734	ENSG00000152931(PART1)	hsa-miR-4709-5p	-21	0.799
5:2438-2459	6mer	0.006
5:2435-2453	6mer	0.006
5:2448-2468	6mer	0.006
5:2435-2456	6mer	0.005
5:2422-2440	6mer	0.005
5:2424-2450	6mer	0.005
>ENST00000515734	ENSG00000152931(PART1)	hsa-miR-3660	-21	0.798
5:239-252	6mer	0.012
5:1848-1856	7mer	0.011
5:2225-2245	6mer	0.005
5:264-286	6mer	0.003
5:1563-1577	6mer	0.002
>ENST00000504876	ENSG00000152931(PART1)	hsa-miR-1231	-21	0.798
5:229-244	8mer	0.021
5:473-482	6mer	0.005
5:557-570	6mer	0.004
5:4950-4955	6mer	0.003
>ENST00000504876	ENSG00000152931(PART1)	hsa-miR-196a-5p	-21	0.797
5:2036-2058	8mer	0.012
5:2653-2673	8mer	0.007
5:2274-2288	7mer	0.005
5:3221-3244	7mer	0.002
5:4017-4043	6mer	0.002
5:1839-1852	6mer	0.002
5:2080-2107	7mer	0.002
>ENST00000515734	ENSG00000152931(PART1)	hsa-miR-3162-3p	-21	0.796
5:2138-2159	8mer	0.033
>ENST00000504876	ENSG00000152931(PART1)	hsa-miR-659-5p	-21	0.795
5:5211-5224	7mer	0.017
5:212-238	7mer	0.008
5:5397-5415	7mer	0.005
5:2600-2622	6mer	0.002
>ENST00000506884	ENSG00000152931(PART1)	hsa-miR-4687-3p	-21	0.795
5:950-973	8mer	0.014
5:1421-1443	7mer	0.009
5:323-344	6mer	0.005
5:1985-1997	6mer	0.003
5:721-741	6mer	0.001
5:1677-1695	6mer	0.001
>ENST00000506884	ENSG00000152931(PART1)	hsa-miR-4675	-21	0.794
5:1777-1792	8mer	0.021
5:323-346	7mer	0.011
>ENST00000515734	ENSG00000152931(PART1)	hsa-miR-6871-5p	-21	0.794
5:893-911	9mer	0.029
5:1410-1428	6mer	0.002
5:983-1006	6mer	0.002
>ENST00000504876	ENSG00000152931(PART1)	hsa-miR-650	-21	0.794
5:5150-5171	7mer	0.015
5:2556-2573	8mer	0.01
5:5490-5508	6mer	0.004
5:3944-3959	6mer	0.002
5:3296-3322	6mer	0.001
>ENST00000515734	ENSG00000152931(PART1)	hsa-miR-9-3p	-21	0.793
5:60-80	7mer	0.016
5:2286-2290	6mer	0.008
5:2360-2384	6mer	0.005
5:813-837	6mer	0.003
>ENST00000504876	ENSG00000152931(PART1)	hsa-miR-7855-5p	-21	0.793
5:281-298	9mer	0.012
5:1901-1922	8mer	0.006
5:5457-5471	6mer	0.005
5:1381-1400	6mer	0.004
5:5051-5062	6mer	0.003
5:5051-5066	6mer	0.002
5:2925-2941	7mer	0.001
>ENST00000506884	ENSG00000152931(PART1)	hsa-miR-6866-5p	-21	0.793
5:88-105	8mer	0.033
>ENST00000504876	ENSG00000152931(PART1)	hsa-miR-1322	-21	0.792
5:4488-4502	9mer	0.006
5:451-466	7mer	0.005
5:3111-3130	8mer	0.005
5:605-627	7mer	0.004
5:4100-4114	6mer	0.003
5:4321-4332	6mer	0.003
5:1823-1844	6mer	0.002
5:2873-2890	6mer	0.002
5:2185-2199	6mer	0.002
5:1930-1952	6mer	0.001
>ENST00000506884	ENSG00000152931(PART1)	hsa-miR-6824-3p	-21	0.791
5:106-115	7mer	0.03
5:723-745	6mer	0.002
>ENST00000504876	ENSG00000152931(PART1)	hsa-miR-4632-5p	-21	0.79
5:4455-4480	8mer	0.016
5:912-927	8mer	0.008
5:2767-2793	7mer	0.005
5:3857-3877	8mer	0.004
>ENST00000504876	ENSG00000152931(PART1)	hsa-miR-6824-3p	-21	0.79
5:39-48	7mer	0.032
>ENST00000504876	ENSG00000152931(PART1)	hsa-miR-3916	-21	0.789
5:4792-4819	7mer	0.012
5:1660-1681	7mer	0.005
5:5540-5557	6mer	0.004
5:3184-3205	9mer	0.003
5:3014-3039	7mer	0.003
5:5424-5438	6mer	0.003
5:329-344	6mer	0.003
>ENST00000515734	ENSG00000152931(PART1)	hsa-miR-6835-5p	-21	0.789
5:757-783	8mer	0.032
>ENST00000504876	ENSG00000152931(PART1)	hsa-miR-544a	-21	0.788
5:2244-2267	8mer	0.006
5:2438-2450	7mer	0.005
5:5244-5265	6mer	0.005
5:4988-5003	6mer	0.004
5:677-692	6mer	0.004
5:4290-4301	6mer	0.003
5:4843-4862	6mer	0.002
5:4536-4540	6mer	0.002
>ENST00000515734	ENSG00000152931(PART1)	hsa-miR-4328	-21	0.787
5:311-326	6mer	0.009
5:434-443	6mer	0.007
5:373-394	6mer	0.006
5:2199-2214	6mer	0.006
5:952-959	6mer	0.004
>ENST00000504876	ENSG00000152931(PART1)	hsa-miR-377-5p	-21	0.786
5:4768-4779	7mer	0.011
5:622-644	7mer	0.011
5:335-354	6mer	0.005
5:3891-3911	7mer	0.003
5:2414-2439	6mer	0.002
>ENST00000504876	ENSG00000152931(PART1)	hsa-miR-6507-3p	-21	0.785
5:5137-5158	8mer	0.012
5:21-31	6mer	0.004
5:392-417	6mer	0.003
5:313-332	6mer	0.003
5:284-288	6mer	0.003
5:3720-3745	6mer	0.002
5:1627-1650	6mer	0.002
5:3755-3759	6mer	0.001
>ENST00000504876	ENSG00000152931(PART1)	hsa-miR-6735-5p	-21	0.785
5:4455-4479	8mer	0.018
5:917-926	8mer	0.008
5:2770-2792	6mer	0.002
5:3859-3876	7mer	0.002
5:3685-3708	6mer	0.002
>ENST00000504876	ENSG00000152931(PART1)	hsa-miR-7853-5p	-21	0.785
5:4422-4448	8mer	0.019
5:4018-4031	8mer	0.009
5:2247-2261	6mer	0.002
5:1893-1909	6mer	0.001
5:4052-4060	6mer	0.001
>ENST00000515734	ENSG00000152931(PART1)	hsa-miR-3606-3p	-21	0.784
5:2422-2433	8mer	0.012
5:995-1001	8mer	0.007
5:2386-2408	6mer	0.006
5:840-845	6mer	0.004
5:881-885	6mer	0.003
>ENST00000504876	ENSG00000152931(PART1)	hsa-miR-454-3p	-21	0.784
5:1090-1107	7mer	0.009
5:4030-4050	8mer	0.006
5:3596-3613	9mer	0.006
5:4950-4962	6mer	0.004
5:2227-2245	7mer	0.003
5:2121-2141	7mer	0.002
5:4906-4928	6mer	0.002
5:3600-3620	6mer	0
>ENST00000515734	ENSG00000152931(PART1)	hsa-miR-6512-3p	-21	0.783
5:29-53	7mer	0.021
5:436-451	6mer	0.004
5:492-517	6mer	0.004
5:446-473	6mer	0.003
>ENST00000506884	ENSG00000152931(PART1)	hsa-miR-767-5p	-21	0.783
5:1550-1575	8mer	0.032
>ENST00000504876	ENSG00000152931(PART1)	hsa-miR-937-5p	-21	0.782
5:3817-3837	8mer	0.029
5:4685-4708	6mer	0.003
>ENST00000504876	ENSG00000152931(PART1)	hsa-miR-4468	-21	0.781
5:1861-1879	8mer	0.018
5:1313-1332	8mer	0.004
5:4573-4590	7mer	0.004
5:1961-1978	7mer	0.001
5:2555-2564	6mer	0.001
5:1282-1300	6mer	0.001
>ENST00000515734	ENSG00000152931(PART1)	hsa-miR-6720-5p	-21	0.78
5:39-53	7mer	0.022
5:504-517	6mer	0.004
5:435-451	6mer	0.004
5:448-473	6mer	0.002
>ENST00000515734	ENSG00000152931(PART1)	hsa-miR-3921	-21	0.78
5:786-794	9mer	0.025
5:533-542	6mer	0.006
>ENST00000504876	ENSG00000152931(PART1)	hsa-miR-1272	-21	0.779
5:454-466	7mer	0.006
5:4858-4876	6mer	0.005
5:618-627	7mer	0.004
5:4088-4114	6mer	0.003
5:4308-4332	6mer	0.003
5:4487-4502	7mer	0.003
5:3107-3130	7mer	0.003
5:1822-1844	6mer	0.002
5:2178-2199	6mer	0.002
5:1929-1952	6mer	0.001
>ENST00000504876	ENSG00000152931(PART1)	hsa-miR-4745-5p	-21	0.779
5:1296-1315	8mer	0.027
5:4957-4964	6mer	0.004
>ENST00000506884	ENSG00000152931(PART1)	hsa-miR-6802-3p	-21	0.779
5:1485-1501	8mer	0.031
>ENST00000504876	ENSG00000152931(PART1)	hsa-miR-577	-21	0.778
5:4869-4890	8mer	0.015
5:4052-4071	7mer	0.006
5:4815-4828	6mer	0.003
5:2765-2786	7mer	0.003
5:3262-3280	6mer	0.002
5:1833-1849	6mer	0.001
5:2081-2103	6mer	0.001
>ENST00000504876	ENSG00000152931(PART1)	hsa-miR-3927-3p	-21	0.778
5:1828-1852	8mer	0.016
5:4024-4043	7mer	0.004
5:2083-2106	8mer	0.003
5:2654-2673	7mer	0.003
5:2039-2057	6mer	0.002
5:2261-2287	6mer	0.002
5:3221-3244	6mer	0.001
>ENST00000504876	ENSG00000152931(PART1)	hsa-miR-4685-3p	-21	0.778
5:1005-1024	8mer	0.016
5:862-880	8mer	0.01
5:2711-2728	8mer	0.006
>ENST00000504876	ENSG00000152931(PART1)	hsa-miR-635	-21	0.778
5:359-381	9mer	0.022
5:2979-2989	6mer	0.002
5:4288-4309	6mer	0.002
5:3674-3697	6mer	0.002
5:2011-2035	7mer	0.002
5:1656-1671	6mer	0.001
>ENST00000506884	ENSG00000152931(PART1)	hsa-miR-4679	-21	0.778
5:111-125	7mer	0.018
5:1764-1788	7mer	0.008
5:31-55	6mer	0.003
5:690-704	6mer	0.002
>ENST00000504876	ENSG00000152931(PART1)	hsa-miR-3679-3p	-21	0.777
5:4420-4436	7mer	0.011
5:86-98	6mer	0.005
5:65-77	6mer	0.005
5:1305-1324	6mer	0.004
5:877-893	8mer	0.003
5:1488-1499	6mer	0.001
5:1684-1705	6mer	0.001
>ENST00000506884	ENSG00000152931(PART1)	hsa-miR-4797-5p	-21	0.777
5:1997-2020	8mer	0.031
>ENST00000504876	ENSG00000152931(PART1)	hsa-miR-4316	-21	0.776
5:279-296	8mer	0.023
5:919-934	7mer	0.004
5:1910-1921	7mer	0.004
>ENST00000504876	ENSG00000152931(PART1)	hsa-miR-7106-5p	-21	0.776
5:4893-4907	7mer	0.012
5:2556-2575	7mer	0.009
5:5491-5509	6mer	0.004
5:3256-3272	7mer	0.004
5:917-929	6mer	0.001
>ENST00000515734	ENSG00000152931(PART1)	hsa-miR-7158-3p	-21	0.775
5:133-147	9mer	0.021
5:2329-2353	6mer	0.005
5:1996-2011	6mer	0.005
>ENST00000504876	ENSG00000152931(PART1)	hsa-miR-579-3p	-21	0.775
5:811-831	7mer	0.008
5:5597-5608	6mer	0.006
5:4994-5017	6mer	0.004
5:814-839	7mer	0.003
5:432-447	6mer	0.003
5:1617-1637	6mer	0.003
5:3817-3832	6mer	0.003
5:2248-2270	6mer	0.001
>ENST00000504876	ENSG00000152931(PART1)	hsa-miR-4756-3p	-21	0.774
5:5524-5549	8mer	0.025
5:3206-3214	9mer	0.004
5:3888-3913	6mer	0.002
>ENST00000506884	ENSG00000152931(PART1)	hsa-miR-6776-5p	-21	0.774
5:675-691	8mer	0.027
5:1141-1151	6mer	0.002
5:233-249	6mer	0.002
>ENST00000515734	ENSG00000152931(PART1)	hsa-miR-6785-5p	-21	0.774
5:156-176	8mer	0.029
5:887-909	6mer	0.002
>ENST00000504876	ENSG00000152931(PART1)	hsa-miR-4768-5p	-21	0.774
5:33-49	6mer	0.018
5:848-872	7mer	0.007
5:296-318	6mer	0.003
5:3542-3567	6mer	0.001
5:2996-3019	6mer	0.001
>ENST00000504876	ENSG00000152931(PART1)	hsa-miR-5696	-21	0.773
5:4995-5017	7mer	0.011
5:806-831	7mer	0.007
5:434-447	7mer	0.007
5:3807-3832	6mer	0.003
5:820-838	6mer	0.002
5:2989-3016	6mer	0.002
>ENST00000506884	ENSG00000152931(PART1)	hsa-miR-1343-3p	-21	0.773
5:1807-1831	7mer	0.008
5:379-395	7mer	0.008
5:551-577	7mer	0.006
5:1916-1933	6mer	0.004
5:1795-1812	6mer	0.003
5:937-954	6mer	0.002
>ENST00000504876	ENSG00000152931(PART1)	hsa-miR-3121-5p	-21	0.773
5:5197-5221	7mer	0.009
5:181-192	6mer	0.007
5:1507-1521	6mer	0.002
5:892-913	6mer	0.002
5:467-491	6mer	0.002
5:3571-3589	8mer+wobble	0.002
5:779-784	6mer	0.002
5:961-987	6mer	0.002
5:997-1021	6mer	0.001
5:1543-1553	6mer	0.001
>ENST00000504876	ENSG00000152931(PART1)	hsa-miR-2277-3p	-21	0.772
5:3634-3650	8mer	0.016
5:3170-3188	7mer	0.004
5:5408-5434	6mer	0.004
5:1006-1016	6mer	0.003
5:756-779	6mer	0.003
5:1820-1833	6mer	0.001
>ENST00000515734	ENSG00000152931(PART1)	hsa-miR-3591-5p	-21	0.772
5:1164-1181	8mer	0.028
5:1498-1516	6mer	0.003
>ENST00000506884	ENSG00000152931(PART1)	hsa-miR-1277-5p	-21	0.77
5:1294-1319	8mer	0.024
5:1611-1626	7mer	0.007
>ENST00000504876	ENSG00000152931(PART1)	hsa-miR-4728-5p	-21	0.769
5:3246-3272	9mer	0.011
5:2555-2575	7mer	0.008
5:5491-5509	6mer	0.004
5:4881-4907	6mer	0.003
5:920-929	7mer	0.003
5:3964-3985	6mer	0.001
>ENST00000504876	ENSG00000152931(PART1)	hsa-miR-6834-5p	-21	0.769
5:2775-2795	7mer	0.008
5:4470-4482	7mer	0.007
5:1147-1159	7mer	0.006
5:269-295	6mer	0.004
5:916-933	8mer	0.004
5:1904-1920	6mer	0.001
>ENST00000515734	ENSG00000152931(PART1)	hsa-miR-513c-3p	-21	0.769
5:2412-2432	7mer	0.008
5:168-194	6mer	0.008
5:2385-2409	6mer	0.006
5:996-1001	7mer	0.004
5:863-885	6mer	0.004
>ENST00000504876	ENSG00000152931(PART1)	hsa-miR-6878-3p	-21	0.768
5:40-45	7mer	0.016
5:1319-1340	8mer	0.007
5:5357-5379	6mer	0.006
5:3696-3719	6mer	0.001
>ENST00000504876	ENSG00000152931(PART1)	hsa-miR-599	-21	0.768
5:479-484	7mer	0.017
5:4920-4937	7mer	0.008
5:261-268	6mer	0.005
>ENST00000504876	ENSG00000152931(PART1)	hsa-miR-6797-5p	-21	0.768
5:2567-2590	8mer	0.016
5:5150-5171	6mer	0.006
5:2631-2657	8mer	0.004
5:917-928	6mer	0.002
5:3249-3270	6mer	0.002
5:3296-3322	6mer	0
>ENST00000504876	ENSG00000152931(PART1)	hsa-miR-890	-21	0.768
5:356-382	7mer	0.008
5:2970-2990	7mer	0.005
5:4297-4309	7mer	0.005
5:5560-5585	6mer	0.004
5:4878-4897	6mer	0.003
5:1649-1671	7mer	0.002
5:3684-3698	6mer	0.002
5:4137-4151	6mer	0.001
5:2012-2035	6mer	0.001
>ENST00000515734	ENSG00000152931(PART1)	hsa-miR-610	-21	0.767
5:406-423	7mer	0.027
5:1694-1710	6mer	0.003
>ENST00000506884	ENSG00000152931(PART1)	hsa-miR-4446-3p	-21	0.767
5:329-346	7mer	0.016
5:1771-1792	7mer	0.01
5:1638-1661	6mer	0.004
>ENST00000515734	ENSG00000152931(PART1)	hsa-miR-4539	-21	0.766
5:129-147	7mer	0.017
5:2349-2367	6mer	0.006
5:1996-2011	6mer	0.004
5:1477-1481	6mer	0.003
>ENST00000515734	ENSG00000152931(PART1)	hsa-miR-4728-5p	-21	0.766
5:158-176	8mer	0.028
5:898-909	6mer	0.003
>ENST00000504876	ENSG00000152931(PART1)	hsa-miR-205-3p	-21	0.766
5:729-749	8mer	0.012
5:382-395	6mer	0.005
5:5355-5370	6mer	0.005
5:5369-5385	6mer	0.003
5:1247-1266	6mer	0.002
5:4281-4304	6mer	0.002
>ENST00000506884	ENSG00000152931(PART1)	hsa-miR-6885-3p	-21	0.766
5:511-532	8mer	0.015
5:2056-2066	6mer	0.007
5:257-275	6mer	0.004
5:623-638	6mer	0.003
5:559-585	6mer	0.002
>ENST00000506884	ENSG00000152931(PART1)	hsa-miR-6887-3p	-21	0.765
5:125-143	8mer	0.024
5:1078-1095	7mer	0.006
>ENST00000506884	ENSG00000152931(PART1)	hsa-miR-6756-5p	-21	0.765
5:1628-1650	7mer	0.012
5:427-446	7mer	0.01
5:768-783	8mer	0.004
5:666-688	6mer	0.002
5:782-805	8mer+wobble	0.001
>ENST00000515734	ENSG00000152931(PART1)	hsa-miR-513a-3p	-21	0.765
5:2412-2432	7mer	0.008
5:170-194	6mer	0.007
5:2385-2409	6mer	0.006
5:996-1001	7mer	0.004
5:863-885	6mer	0.004
>ENST00000506884	ENSG00000152931(PART1)	hsa-miR-4768-5p	-21	0.764
5:100-116	6mer	0.017
5:1387-1402	7mer	0.006
5:1232-1258	6mer	0.005
5:1911-1936	6mer	0.003
>ENST00000515734	ENSG00000152931(PART1)	hsa-miR-1827	-21	0.764
5:2247-2262	8mer	0.014
5:2184-2202	7mer	0.01
5:511-529	6mer	0.004
5:318-335	6mer	0.002
>ENST00000504876	ENSG00000152931(PART1)	hsa-miR-4288	-21	0.764
5:559-571	7mer	0.013
5:5302-5313	6mer	0.006
5:226-243	6mer	0.005
5:4904-4914	6mer	0.003
5:4948-4954	6mer	0.002
5:1209-1225	6mer	0.002
>ENST00000515734	ENSG00000152931(PART1)	hsa-miR-6730-3p	-21	0.763
5:240-252	6mer	0.012
5:260-286	7mer	0.008
5:2241-2245	6mer	0.005
5:1848-1856	6mer	0.005
>ENST00000515734	ENSG00000152931(PART1)	hsa-miR-6885-3p	-21	0.762
5:2252-2277	7mer	0.022
5:1847-1860	6mer	0.006
5:684-702	6mer	0.002
>ENST00000506884	ENSG00000152931(PART1)	hsa-miR-4689	-21	0.762
5:1466-1483	8mer	0.03
>ENST00000504876	ENSG00000152931(PART1)	hsa-miR-30c-2-3p	-21	0.762
5:3967-3985	8mer	0.014
5:5395-5418	6mer	0.004
5:165-181	6mer	0.003
5:583-606	6mer	0.002
5:2567-2575	6mer	0.002
5:3261-3272	6mer	0.001
5:1742-1763	6mer	0.001
5:3516-3540	6mer	0.001
5:3382-3407	6mer	0.001
>ENST00000504876	ENSG00000152931(PART1)	hsa-miR-542-3p	-21	0.762
5:1822-1835	8mer	0.014
5:3169-3190	8mer	0.007
5:311-328	6mer	0.005
5:3343-3348	6mer	0.002
5:2469-2487	6mer	0.001
>ENST00000504876	ENSG00000152931(PART1)	hsa-miR-4287	-21	0.759
5:1009-1024	8mer	0.016
5:873-880	8mer	0.01
5:2718-2728	7mer	0.003
>ENST00000504876	ENSG00000152931(PART1)	hsa-miR-3591-5p	-21	0.759
5:1608-1628	7mer	0.011
5:1096-1109	7mer	0.006
5:5255-5271	6mer	0.005
5:4443-4462	6mer	0.003
5:3475-3494	6mer	0.002
5:3084-3107	6mer	0.002
>ENST00000504876	ENSG00000152931(PART1)	hsa-miR-548aw	-21	0.757
5:5200-5217	7mer	0.013
5:2225-2244	7mer	0.005
5:2435-2447	7mer	0.004
5:4022-4048	6mer	0.002
5:3220-3237	6mer	0.002
5:1838-1861	6mer	0.002
5:3599-3611	6mer	0.001
5:2259-2263	6mer	0.001
>ENST00000504876	ENSG00000152931(PART1)	hsa-miR-1298-5p	-21	0.756
5:5591-5608	7mer	0.016
5:2257-2270	7mer	0.006
5:1615-1637	6mer	0.003
5:813-839	6mer	0.002
5:3003-3021	6mer	0.001
>ENST00000506884	ENSG00000152931(PART1)	hsa-miR-3180-5p	-21	0.756
5:85-90	7mer	0.019
5:29-46	6mer	0.006
5:1570-1583	6mer	0.003
5:1021-1035	6mer	0.002
>ENST00000504876	ENSG00000152931(PART1)	hsa-miR-4446-5p	-21	0.756
5:5470-5486	6mer	0.006
5:59-78	6mer	0.005
5:4418-4438	7mer	0.005
5:73-99	6mer	0.004
5:648-673	6mer	0.004
5:5064-5088	6mer	0.003
5:1261-1265	6mer	0.003
>ENST00000506884	ENSG00000152931(PART1)	hsa-miR-632	-21	0.754
5:515-541	8mer	0.022
5:975-986	7mer	0.003
5:1726-1736	6mer	0.003
>ENST00000515734	ENSG00000152931(PART1)	hsa-miR-21-5p	-21	0.754
5:1920-1941	8mer	0.029
>ENST00000504876	ENSG00000152931(PART1)	hsa-miR-3148	-21	0.754
5:4169-4188	8mer	0.011
5:3804-3825	7mer	0.006
5:1353-1376	6mer	0.003
5:4788-4803	6mer	0.002
5:4892-4903	6mer	0.002
5:3836-3858	7mer	0.002
5:2899-2916	6mer	0.001
5:1989-2009	6mer	0.001
>ENST00000504876	ENSG00000152931(PART1)	hsa-miR-4443	-21	0.754
5:339-357	7mer	0.01
5:4765-4781	6mer	0.004
5:636-646	6mer	0.004
5:1025-1042	6mer	0.003
5:2580-2592	7mer	0.002
5:1651-1669	6mer	0.001
5:2510-2524	6mer	0.001
5:2679-2704	6mer	0.001
5:2647-2658	6mer	0.001
5:3913-3935	6mer	0.001
5:3947-3962	6mer	0
>ENST00000515734	ENSG00000152931(PART1)	hsa-miR-129-5p	-21	0.754
5:2254-2279	7mer	0.029
>ENST00000504876	ENSG00000152931(PART1)	hsa-miR-590-3p	-21	0.752
5:5034-5049	7mer	0.009
5:5287-5301	7mer	0.007
5:5229-5254	6mer	0.005
5:2205-2228	7mer	0.004
5:3490-3507	7mer	0.003
5:4425-4440	6mer	0.002
>ENST00000504876	ENSG00000152931(PART1)	hsa-miR-6831-5p	-21	0.752
5:1826-1852	7mer	0.007
5:2039-2058	7mer	0.005
5:2279-2288	7mer	0.005
5:2083-2107	8mer	0.005
5:4024-4043	7mer	0.004
5:2649-2673	6mer	0.001
5:3220-3244	6mer	0.001
>ENST00000515734	ENSG00000152931(PART1)	hsa-miR-200b-3p	-21	0.752
5:133-151	7mer	0.022
5:2035-2058	6mer	0.005
5:1595-1622	6mer	0.002
>ENST00000506884	ENSG00000152931(PART1)	hsa-miR-936	-21	0.752
5:1855-1875	8mer	0.029
>ENST00000504876	ENSG00000152931(PART1)	hsa-miR-3973	-21	0.751
5:3739-3759	7mer	0.006
5:14-31	6mer	0.006
5:312-332	6mer	0.003
5:1270-1293	6mer	0.003
5:5135-5158	6mer	0.003
5:284-288	6mer	0.003
5:4094-4119	6mer	0.002
5:1625-1650	6mer	0.002
5:3388-3414	6mer	0.001
>ENST00000515734	ENSG00000152931(PART1)	hsa-miR-584-3p	-21	0.751
5:316-326	7mer	0.016
5:2150-2163	7mer	0.006
5:2191-2215	6mer	0.003
5:940-960	6mer	0.002
5:1118-1137	6mer	0.002
>ENST00000504876	ENSG00000152931(PART1)	hsa-miR-216a-3p	-21	0.751
5:5076-5100	8mer	0.024
5:1455-1472	6mer	0.002
5:802-817	6mer	0.001
5:2661-2676	6mer	0.001
>ENST00000506884	ENSG00000152931(PART1)	hsa-miR-6886-3p	-21	0.751
5:247-261	7mer	0.01
5:16-36	6mer	0.01
5:1172-1177	7mer	0.009
>ENST00000504876	ENSG00000152931(PART1)	hsa-miR-6887-3p	-21	0.75
5:58-76	8mer	0.024
5:868-885	7mer	0.002
5:876-890	7mer	0.002
5:1205-1220	6mer	0.001
>ENST00000504876	ENSG00000152931(PART1)	hsa-miR-6077	-21	0.75
5:120-131	8mer	0.009
5:2832-2845	7mer	0.005
5:590-604	6mer	0.004
5:2641-2654	7mer	0.003
5:1152-1156	6mer	0.003
5:3799-3814	6mer	0.002
5:3180-3202	7mer	0.002
>ENST00000506884	ENSG00000152931(PART1)	hsa-miR-3150b-3p	-21	0.75
5:1458-1483	8mer	0.026
5:1673-1687	6mer	0.003
>ENST00000504876	ENSG00000152931(PART1)	hsa-miR-6809-3p	-21	0.748
5:39-49	6mer	0.018
5:867-871	6mer	0.004
5:213-226	6mer	0.004
5:1012-1026	6mer	0.003
>ENST00000506884	ENSG00000152931(PART1)	hsa-miR-6878-3p	-21	0.748
5:107-112	7mer	0.015
5:1805-1828	8mer	0.013
>ENST00000504876	ENSG00000152931(PART1)	hsa-miR-1179	-21	0.748
5:5217-5237	6mer	0.007
5:5554-5570	6mer	0.006
5:2344-2364	7mer	0.006
5:491-510	6mer	0.004
5:1144-1153	7mer	0.003
5:3668-3685	6mer	0.002
5:2664-2684	6mer	0.002
>ENST00000504876	ENSG00000152931(PART1)	hsa-miR-569	-21	0.748
5:237-255	8mer	0.013
5:1232-1244	8mer	0.009
5:696-723	6mer	0.005
5:3894-3907	6mer	0.002
>ENST00000506884	ENSG00000152931(PART1)	hsa-miR-149-5p	-21	0.747
5:1426-1445	7mer	0.011
5:87-113	6mer	0.008
5:1987-1999	6mer	0.004
5:717-743	7mer	0.003
5:1680-1696	6mer	0.002
>ENST00000504876	ENSG00000152931(PART1)	hsa-miR-589-5p	-21	0.747
5:4679-4694	9mer	0.014
5:4725-4741	8mer	0.006
5:1705-1731	6mer	0.002
5:3123-3147	6mer	0.002
5:2617-2638	6mer	0.002
5:2236-2257	6mer	0.001
5:3987-4009	6mer	0.001
>ENST00000504876	ENSG00000152931(PART1)	hsa-miR-6828-5p	-21	0.746
5:43-64	7mer	0.008
5:1150-1155	7mer	0.007
5:1519-1539	7mer	0.003
5:2007-2022	7mer	0.003
5:581-603	6mer	0.003
5:3187-3202	6mer	0.002
5:2827-2845	6mer	0.002
>ENST00000504876	ENSG00000152931(PART1)	hsa-miR-3184-3p	-21	0.746
5:4757-4771	8mer	0.014
5:403-417	6mer	0.004
5:3797-3811	7mer	0.003
5:3720-3745	6mer	0.003
5:5134-5157	6mer	0.003
5:1792-1815	6mer	0.002
>ENST00000504876	ENSG00000152931(PART1)	hsa-miR-671-5p	-21	0.746
5:590-603	7mer	0.009
5:43-64	7mer	0.008
5:1524-1539	7mer	0.004
5:1151-1155	6mer	0.003
5:3184-3202	6mer	0.002
5:2820-2845	6mer	0.002
5:2003-2022	6mer	0.001
5:1524-1543	6mer	0.001
>ENST00000504876	ENSG00000152931(PART1)	hsa-miR-4460	-21	0.745
5:5440-5461	7mer	0.012
5:5332-5350	7mer	0.011
5:1618-1626	6mer	0.005
>ENST00000515734	ENSG00000152931(PART1)	hsa-miR-4264	-21	0.745
5:178-199	6mer	0.009
5:385-396	6mer	0.007
5:1121-1139	7mer	0.004
5:957-961	6mer	0.003
5:1723-1741	6mer	0.003
5:690-711	6mer	0.002
>ENST00000515734	ENSG00000152931(PART1)	hsa-miR-4489	-21	0.745
5:2073-2092	7mer	0.028
>ENST00000504876	ENSG00000152931(PART1)	hsa-miR-2681-5p	-21	0.745
5:4372-4396	8mer	0.014
5:934-953	7mer	0.011
5:3350-3363	6mer	0.002
5:1405-1432	6mer	0.002
>ENST00000506884	ENSG00000152931(PART1)	hsa-miR-6763-5p	-21	0.745
5:1135-1150	9mer	0.027
5:793-808	6mer	0.001
>ENST00000515734	ENSG00000152931(PART1)	hsa-miR-149-3p	-21	0.744
5:160-175	8mer	0.024
5:850-860	6mer	0.002
5:1141-1162	6mer	0.002
>ENST00000504876	ENSG00000152931(PART1)	hsa-miR-17-5p	-21	0.744
5:11-31	7mer	0.008
5:306-332	7mer	0.005
5:1625-1650	7mer	0.003
5:5143-5158	6mer	0.003
5:275-288	7mer	0.003
5:3390-3414	9mer	0.003
5:3737-3759	6mer	0.002
>ENST00000515734	ENSG00000152931(PART1)	hsa-miR-518c-5p	-21	0.744
5:515-542	7mer	0.022
5:389-404	8mer	0.006
>ENST00000504876	ENSG00000152931(PART1)	hsa-miR-6889-3p	-21	0.743
5:4987-5001	8mer	0.023
5:4927-4952	6mer	0.003
5:2498-2502	6mer	0.002
>ENST00000504876	ENSG00000152931(PART1)	hsa-miR-1255a	-21	0.743
5:2619-2642	8mer	0.008
5:610-629	7mer	0.007
5:329-342	6mer	0.004
5:842-851	6mer	0.003
5:1463-1487	6mer	0.002
5:4485-4503	6mer	0.002
5:3457-3462	6mer	0.001
>ENST00000515734	ENSG00000152931(PART1)	hsa-miR-429	-21	0.743
5:128-151	7mer	0.021
5:2047-2058	6mer	0.005
5:1608-1622	6mer	0.002
>ENST00000504876	ENSG00000152931(PART1)	hsa-miR-3921	-21	0.742
5:4975-4989	7mer	0.012
5:39-48	6mer	0.009
5:866-870	6mer	0.004
5:5113-5137	6mer	0.003
>ENST00000515734	ENSG00000152931(PART1)	hsa-miR-2681-3p	-21	0.742
5:2285-2312	7mer	0.019
5:1297-1313	7mer	0.009
>ENST00000506884	ENSG00000152931(PART1)	hsa-miR-4710	-21	0.742
5:662-677	8mer	0.018
5:449-468	8mer	0.008
5:967-980	6mer	0.002
>ENST00000504876	ENSG00000152931(PART1)	hsa-miR-6785-5p	-21	0.742
5:2555-2575	7mer	0.009
5:3255-3272	8mer	0.009
5:916-929	8mer	0.005
5:4886-4907	6mer	0.003
5:3960-3985	6mer	0.002
>ENST00000504876	ENSG00000152931(PART1)	hsa-miR-4276	-21	0.741
5:735-746	8mer	0.011
5:742-756	7mer	0.01
5:713-726	6mer	0.004
5:197-223	6mer	0.004
>ENST00000504876	ENSG00000152931(PART1)	hsa-miR-93-5p	-21	0.741
5:11-31	7mer	0.008
5:306-332	7mer	0.005
5:1625-1650	7mer	0.003
5:275-288	7mer	0.003
5:5142-5158	6mer	0.003
5:3390-3414	9mer	0.003
5:3737-3759	6mer	0.002
>ENST00000504876	ENSG00000152931(PART1)	hsa-miR-1304-3p	-21	0.74
5:4259-4271	8mer	0.018
5:829-845	6mer	0.004
5:4754-4767	6mer	0.003
5:3580-3599	7mer	0.002
5:2329-2340	6mer	0.001
>ENST00000504876	ENSG00000152931(PART1)	hsa-miR-500a-5p	-21	0.74
5:2280-2306	8mer	0.026
5:1543-1559	6mer	0.002
>ENST00000504876	ENSG00000152931(PART1)	hsa-miR-3682-3p	-21	0.74
5:4317-4333	8mer	0.01
5:4855-4876	6mer	0.006
5:449-466	6mer	0.004
5:607-627	6mer	0.003
5:3104-3131	7mer	0.002
5:4478-4502	6mer	0.001
5:1927-1953	7mer	0.001
5:1590-1609	6mer	0.001
>ENST00000515734	ENSG00000152931(PART1)	hsa-miR-3622b-3p	-21	0.739
5:2048-2074	7mer	0.014
5:563-583	7mer	0.014
>ENST00000504876	ENSG00000152931(PART1)	hsa-miR-4671-3p	-21	0.739
5:1088-1108	8mer	0.017
5:4024-4050	7mer	0.004
5:3600-3613	7mer	0.003
5:4906-4929	6mer	0.002
5:2119-2142	7mer	0.001
>ENST00000504876	ENSG00000152931(PART1)	hsa-miR-20b-5p	-21	0.739
5:11-31	7mer	0.008
5:306-332	7mer	0.005
5:1625-1650	7mer	0.003
5:275-288	7mer	0.003
5:5131-5158	6mer	0.003
5:3390-3414	9mer	0.003
5:3737-3759	6mer	0.002
>ENST00000504876	ENSG00000152931(PART1)	hsa-miR-4298	-21	0.739
5:5396-5418	7mer	0.011
5:1619-1645	7mer	0.007
5:157-181	7mer	0.006
5:1745-1763	7mer	0.002
5:3522-3540	7mer	0.002
5:3387-3407	6mer	0.001
>ENST00000515734	ENSG00000152931(PART1)	hsa-miR-4428	-21	0.739
5:856-875	7mer	0.021
5:537-560	6mer	0.003
5:1346-1372	6mer	0.002
5:1728-1751	6mer	0.002
>ENST00000506884	ENSG00000152931(PART1)	hsa-miR-4794	-21	0.739
5:1426-1445	7mer	0.01
5:94-113	6mer	0.007
5:1979-1999	6mer	0.004
5:725-743	7mer	0.004
5:1685-1696	6mer	0.003
>ENST00000506884	ENSG00000152931(PART1)	hsa-miR-4646-5p	-21	0.739
5:556-575	7mer	0.009
5:179-200	8mer+wobble	0.008
5:486-500	8mer	0.006
5:1888-1909	6mer	0.004
5:225-248	6mer	0.002
>ENST00000506884	ENSG00000152931(PART1)	hsa-miR-3200-3p	-21	0.738
5:171-190	7mer	0.008
5:2054-2058	6mer	0.008
5:1722-1744	6mer	0.007
5:1036-1050	7mer	0.005
>ENST00000504876	ENSG00000152931(PART1)	hsa-miR-3928-5p	-21	0.737
5:40-62	6mer	0.01
5:782-804	7mer	0.006
5:4725-4749	7mer	0.006
5:1519-1537	6mer	0.002
5:2371-2391	6mer	0.002
5:1189-1208	6mer	0.001
>ENST00000506884	ENSG00000152931(PART1)	hsa-miR-6754-5p	-21	0.737
5:1010-1033	8mer	0.028
>ENST00000506884	ENSG00000152931(PART1)	hsa-miR-4784	-21	0.737
5:1470-1483	8mer	0.025
5:1662-1687	6mer	0.003
>ENST00000504876	ENSG00000152931(PART1)	hsa-miR-4535	-21	0.736
5:5204-5226	7mer	0.015
5:229-239	7mer	0.009
5:2613-2624	9mer	0.004
>ENST00000515734	ENSG00000152931(PART1)	hsa-miR-103a-2-5p	-21	0.735
5:64-77	7mer	0.015
5:1687-1708	8mer	0.01
5:1072-1096	6mer	0.002
>ENST00000504876	ENSG00000152931(PART1)	hsa-miR-630	-21	0.735
5:4993-5005	8mer	0.024
5:376-398	6mer	0.003
>ENST00000515734	ENSG00000152931(PART1)	hsa-miR-4503	-21	0.735
5:191-205	7mer	0.014
5:2533-2557	6mer	0.007
5:109-125	6mer	0.006
>ENST00000504876	ENSG00000152931(PART1)	hsa-miR-6861-3p	-21	0.734
5:5220-5225	7mer	0.015
5:213-239	7mer	0.006
5:2618-2623	7mer	0.004
5:5403-5415	6mer	0.003
>ENST00000515734	ENSG00000152931(PART1)	hsa-miR-586	-21	0.734
5:2518-2526	7mer	0.02
5:295-311	6mer	0.008
>ENST00000504876	ENSG00000152931(PART1)	hsa-miR-128-3p	-21	0.734
5:5078-5100	8mer	0.022
5:1452-1472	6mer	0.002
5:805-817	6mer	0.002
5:2664-2676	6mer	0.001
>ENST00000506884	ENSG00000152931(PART1)	hsa-miR-3664-5p	-21	0.734
5:1533-1551	8mer	0.015
5:1504-1530	8mer	0.012
>ENST00000506884	ENSG00000152931(PART1)	hsa-miR-4690-3p	-21	0.734
5:14-39	7mer	0.027
>ENST00000506884	ENSG00000152931(PART1)	hsa-miR-6832-5p	-21	0.734
5:1862-1874	8mer	0.016
5:1374-1378	6mer	0.005
5:63-81	6mer	0.005
>ENST00000504876	ENSG00000152931(PART1)	hsa-miR-6088	-21	0.734
5:5531-5548	8mer	0.018
5:2752-2773	7mer	0.005
5:3193-3212	9mer	0.004
5:2816-2841	6mer	0.001
>ENST00000504876	ENSG00000152931(PART1)	hsa-miR-6740-3p	-21	0.734
5:1012-1029	9mer	0.013
5:215-229	8mer	0.012
5:4267-4289	6mer	0.002
>ENST00000504876	ENSG00000152931(PART1)	hsa-miR-1294	-21	0.733
5:4467-4483	7mer	0.005
5:2784-2796	7mer	0.005
5:240-266	6mer	0.004
5:1903-1920	7mer	0.004
5:270-295	6mer	0.004
5:3816-3838	6mer	0.002
5:911-933	6mer	0.002
>ENST00000504876	ENSG00000152931(PART1)	hsa-miR-3663-3p	-21	0.733
5:4141-4164	7mer	0.015
5:5520-5543	6mer	0.004
5:3908-3926	7mer	0.003
5:1589-1606	7mer	0.002
5:1858-1880	6mer	0.002
>ENST00000506884	ENSG00000152931(PART1)	hsa-miR-3121-5p	-21	0.733
5:1578-1599	7mer	0.01
5:248-259	6mer	0.006
5:1792-1806	8mer+wobble	0.006
5:946-962	6mer	0.003
5:690-697	6mer	0.002
>ENST00000504876	ENSG00000152931(PART1)	hsa-miR-513a-3p	-21	0.733
5:5357-5373	9mer	0.025
>ENST00000504876	ENSG00000152931(PART1)	hsa-miR-513c-3p	-21	0.733
5:5357-5373	9mer	0.025
5:4484-4509	6mer	0.002
5:4484-4509	6mer	0.002
>ENST00000506884	ENSG00000152931(PART1)	hsa-miR-1247-5p	-21	0.733
5:502-519	8mer	0.027
>ENST00000515734	ENSG00000152931(PART1)	hsa-miR-3176	-21	0.733
5:513-539	7mer	0.024
5:49-66	6mer	0.003
>ENST00000506884	ENSG00000152931(PART1)	hsa-miR-4732-5p	-21	0.733
5:1358-1379	7mer	0.017
5:64-69	6mer	0.006
5:1863-1873	6mer	0.004
>ENST00000504876	ENSG00000152931(PART1)	hsa-miR-6870-3p	-21	0.732
5:5404-5426	7mer	0.013
5:1413-1418	7mer	0.011
5:4790-4794	6mer	0.004
>ENST00000504876	ENSG00000152931(PART1)	hsa-miR-3612	-21	0.732
5:5155-5171	7mer	0.014
5:2556-2573	7mer	0.006
5:5491-5508	6mer	0.005
5:3932-3959	6mer	0.002
5:3296-3322	6mer	0.001
>ENST00000515734	ENSG00000152931(PART1)	hsa-miR-452-3p	-21	0.732
5:467-486	8mer	0.021
5:1777-1796	6mer	0.006
>ENST00000506884	ENSG00000152931(PART1)	hsa-miR-3126-3p	-21	0.732
5:1423-1447	8mer	0.015
5:37-57	6mer	0.004
5:455-473	7mer	0.004
5:988-1003	7mer	0.002
5:1129-1152	6mer	0.002
>ENST00000506884	ENSG00000152931(PART1)	hsa-miR-6809-3p	-21	0.731
5:106-116	6mer	0.017
5:1392-1401	7mer	0.008
5:816-821	6mer	0.002
>ENST00000515734	ENSG00000152931(PART1)	hsa-miR-4653-5p	-21	0.731
5:774-794	8mer	0.027
>ENST00000515734	ENSG00000152931(PART1)	hsa-miR-3907	-21	0.731
5:101-121	7mer	0.027
>ENST00000504876	ENSG00000152931(PART1)	hsa-miR-4732-5p	-21	0.731
5:5535-5560	7mer	0.014
5:4834-4858	7mer	0.007
5:2542-2566	8mer	0.004
5:2758-2777	6mer	0.002
>ENST00000504876	ENSG00000152931(PART1)	hsa-miR-3149	-21	0.73
5:4992-5008	7mer	0.015
5:3479-3502	7mer	0.007
5:366-386	6mer	0.003
5:4506-4527	6mer	0.003
>ENST00000504876	ENSG00000152931(PART1)	hsa-miR-4717-3p	-21	0.73
5:4215-4231	7mer	0.012
5:5475-5497	6mer	0.005
5:2396-2414	7mer	0.005
5:5470-5490	6mer	0.004
5:4329-4354	6mer	0.001
5:4390-4413	6mer	0.001
>ENST00000515734	ENSG00000152931(PART1)	hsa-miR-6883-5p	-21	0.73
5:157-175	7mer	0.014
5:154-172	6mer	0.009
5:845-860	6mer	0.002
5:1146-1162	6mer	0.002
>ENST00000515734	ENSG00000152931(PART1)	hsa-miR-769-3p	-21	0.73
5:1783-1801	7mer	0.022
5:163-177	6mer	0.004
5:657-675	6mer	0.002
>ENST00000515734	ENSG00000152931(PART1)	hsa-miR-500a-5p	-21	0.729
5:201-223	7mer	0.027
>ENST00000515734	ENSG00000152931(PART1)	hsa-miR-4312	-21	0.729
5:261-279	7mer	0.015
5:2491-2496	6mer	0.007
5:513-537	6mer	0.005
>ENST00000504876	ENSG00000152931(PART1)	hsa-miR-6859-5p	-21	0.729
5:1666-1681	8mer	0.007
5:4792-4818	6mer	0.004
5:3020-3039	8mer	0.004
5:5531-5557	6mer	0.004
5:324-344	6mer	0.002
5:3185-3204	7mer	0.002
5:594-612	6mer	0.002
5:1882-1901	6mer	0.001
5:3859-3879	6mer	0.001
>ENST00000504876	ENSG00000152931(PART1)	hsa-miR-374a-5p	-21	0.729
5:5304-5330	7mer	0.015
5:858-863	7mer	0.009
5:4698-4720	6mer	0.002
>ENST00000506884	ENSG00000152931(PART1)	hsa-miR-6846-3p	-21	0.728
5:1742-1759	9mer	0.027
>ENST00000506884	ENSG00000152931(PART1)	hsa-miR-204-3p	-21	0.728
5:1893-1910	7mer	0.01
5:549-575	7mer	0.009
5:483-501	9mer	0.005
5:229-248	6mer	0.002
5:790-809	6mer	0.002
>ENST00000515734	ENSG00000152931(PART1)	hsa-miR-580-3p	-21	0.727
5:1585-1603	9mer	0.021
5:1880-1904	6mer	0.003
5:859-868	6mer	0.003
>ENST00000515734	ENSG00000152931(PART1)	hsa-miR-222-5p	-21	0.727
5:177-199	7mer	0.016
5:369-396	6mer	0.005
[truncated: 462 more rows]
