# Supplementary material for: LncRNA PART1 Promotes Proliferation and Migration, Is Associated with Cancer Stem Cells, and Alters the miRNA Landscape in Triple-Negative Breast Cancer
Source: Cancers (Basel). 2021 May 27;13(11):2644. doi: 10.3390/cancers13112644 (PMC8198907; doi:10.3390/cancers13112644)
Supplement: Supplementary file 1 [file cancers-13-02644-s001.zip › File S5.xlsx]

## Sheet: HCC1806
Transcript Cluster	Accession	miRNA	GapmeR 1 treatment signal	GapmeR 2 treatment signal	Negative control gapmeR treatment signal	GapmeR 1 standard deviation	GapmeR 2 standard deviation	Negative control gapmeR standard deviation	GapmeR 1 vs negative control gapmeR fold change	GapmeR 1 vs negative control gapmeR fold change p-value	GapmeR 2 vs negative control gapmeR fold change	GapmeR 1 vs negative control gapmeR fold change p-value	Number of common PART1 mRNA targets	Common PART1 mRNA targets
20500114	MIMAT0010195	hsa-let-7a-2-3p	2.03	1.45	1.41	0.55	0.41	0.37	1.53	0.405703	1.03	0.346383	19	HS6ST2, CDH10, KCNS2, STAG1, MED6, SYT1, ZFP69B, TBCEL, ZHX2, ROBO1, TBC1D2B, SMAD2, KCNH5, DNM1L, TBCK, DGKH, TUSC3, NR6A1, GPR125
20500118	MIMAT0026472	hsa-let-7c-3p	1.01	1.1	0.71	0.17	0.11	0.16	1.23	0.341436	1.3	0.03083	20	STAG1, HS6ST2, MED6, NETO1, ZHX2, ROBO1, ZNF708, KCNS2, CDKAL1, DGKH, TUSC3, GAB1, NR6A1, DNM1L, TBC1D2B, TECPR2, TBCEL, SUPT3H, ACSL3, GPR125
20534347	MI0000067	hsa-let-7f-1	1.04	1.04	0.83	0.04	0.11	0.11	1.16	0.171285	1.16	0.220501	24	L3HYPDH, TBC1D2B, MEI4, MED6, KCNH5, MAN2A1, ACSL3, DGKH, SYT1, GAB1, TBCEL, ZNF708, USP32, TMEM194A, HS6ST2, KCNS2, TBCK, SMAD2, NETO1, SUPT3H, ZBTB40, EFHC2, GPR125, ARL15
20534348	MI0000067	hsa-let-7f-1	0.85	1.07	0.66	0.17	0.1	0.28	1.14	0.283509	1.32	0.240794	24	L3HYPDH, TBC1D2B, MEI4, MED6, KCNH5, MAN2A1, ACSL3, DGKH, SYT1, GAB1, TBCEL, ZNF708, USP32, TMEM194A, HS6ST2, KCNS2, TBCK, SMAD2, NETO1, SUPT3H, ZBTB40, EFHC2, GPR125, ARL15
20500190	MIMAT0009196	hsa-miR-103a-2-5p	2.76	2.23	3.27	0.89	0.41	1.19	-1.42	0.661392	-2.05	0.649164	17	MAN2A1, TBCEL, ROBO1, TBCK, SMAD2, ZFP69B, OVOL1, HS6ST2, GRAMD1B, SYT1, NR6A1, ZNF708, TECPR2, GAB1, SUPT3H, MYO5A, HLCS
20500195	MIMAT0004517	hsa-miR-106a-3p	1.18	0.9	0.69	0.27	0.11	0.11	1.4	0.059657	1.15	0.014617	20	TMEM194A, DNM1L, MSR1, NETO1, DGKH, MAN2A1, NR6A1, PPP2R3A, TBC1D2B, USP32, TECPR2, SLC39A11, SMAD2, ZNF708, ROBO1, TBCK, MYO5A, ACSL3, GRAMD1B, TUSC3
20500439	MIMAT0004555	hsa-miR-10a-3p	3.07	1.4	3.46	1.22	1	0.67	-1.31	0.313103	-4.17	0.135897	16	ARL15, L3HYPDH, KCNS2, HS6ST2, GRAMD1B, TBCEL, NETO1, KCNH5, DGKH, PPP2R3A, ACSL3, TECPR2, MED6, ZNF708, SUPT3H, SMAD2
20506715	MIMAT0005828	hsa-miR-1183	3.01	1.15	2.89	0.86	0.66	0.5	1.09	0.237574	-3.34	0.114931	21	NETO1, ZFP69B, CDH10, TBC1D2B, MAN2A1, ACSL3, GAB1, PPP2R3A, KCNS2, ZNF708, DGKH, USP32, SMAD2, SUPT3H, DNM1L, GRAMD1B, KCNH5, TBCEL, HLCS, L3HYPDH, TUSC3
20504585	MIMAT0022838	hsa-miR-1185-1-3p	2.17	1.67	2.19	0.54	0.37	0.3	-1.01	0.813728	-1.44	0.019551	22	PUS10, ACSL3, DGKH, L3HYPDH, MEI4, KCNH5, NETO1, TBC1D2B, USP32, MED6, GAB1, GABRA3, MAN2A1, TBCK, TMEM194A, MYO5A, ZBTB40, SUPT3H, ZNF708, SMAD2, ROBO1, EFHC2
20506794	MIMAT0005863	hsa-miR-1200	1.28	1.01	1.41	0.2	0.2	0.34	-1.09	0.644684	-1.31	0.223677	23	ARL15, OR8B8, SSTR3, TMEM194A, NR6A1, ZFP69B, PPP2R3A, SLC39A11, GABRA3, GAB1, HLCS, KCNH5, HS6ST2, KCNS2, DGKH, ZNF708, TECPR2, TBCK, GRAMD1B, TUSC3, SMAD2, MED6, GPR125
20506777	MIMAT0005584	hsa-miR-1229-3p	5.04	5.34	4.91	0.23	0.93	0.77	1.1	0.769323	1.35	0.740748	21	C5AR2, ZFP69B, HS6ST2, TMEM194A, COL28A1, KCNH5, NR6A1, MAN2A1, GRAMD1B, TBCK, DGKH, ZNF708, ZBTB40, TECPR2, SSTR3, GAB1, SMAD2, TBCEL, MYO5A, HLCS, TBC1D2B
20506776	MIMAT0022942	hsa-miR-1229-5p	4.99	4.96	5.49	0.28	0.26	0.76	-1.42	0.903482	-1.44	0.883398	17	ARL15, EDDM3B, CDH10, C1QTNF9, STAG1, HLCS, NR6A1, ZFP69B, ACSL3, OVOL1, KCNH5, GAB1, GRAMD1B, MYO5A, DGKH, SMAD2, SYT1
20506779	MIMAT0005586	hsa-miR-1231	3.06	2.89	3.61	0.71	0.94	0.6	-1.47	0.740718	-1.65	0.363726	15	QPCT, CDKAL1, C5AR2, ZFP69B, SYT1, TECPR2, TBCK, USP32, NR6A1, DGKH, TBC1D2B, KCNH5, ZBTB40, GRAMD1B, ZNF708
20506843	MIMAT0026740	hsa-miR-1250-3p	1.21	0.74	0.74	0.23	0.26	0.26	1.39	0.386052	-1	0.983288	30	QPCT, HS6ST2, C1QTNF9, KCNH5, DGKH, MEI4, MYO5A, TBCK, SYT1, HLCS, ZNF708, MSR1, SSTR3, PPP2R3A, TMEM194A, STAG1, ZFP69B, MAN2A1, GAB1, TBCEL, ZBTB40, GABRA3, ACSL3, SMAD2, TUSC3, EFHC2, ROBO1, DNM1L, GPR125, NETO1
20506891	MIMAT0005945	hsa-miR-1255b-5p	1.05	1.41	0.76	0.43	0.27	0.32	1.22	0.783478	1.56	0.232359	17	STAG1, GABRA3, MYO5A, DGKH, KCNS2, TBCEL, PPP2R3A, SLC39A11, GRAMD1B, GAB1, TECPR2, PMM2, ZBTB40, MED6, ZNF708, SMAD2, GPR125
20534616	MI0000470	hsa-mir-125b-2	1.8	1.31	1.23	0.42	0.06	0.2	1.48	0.106971	1.06	0.839247	21	PUS10, SUPT3H, MSR1, MED6, ACSL3, KCNS2, PPP2R3A, NETO1, DGKH, HLCS, SMAD2, TBC1D2B, MAN2A1, DNM1L, TMEM194A, TECPR2, SSTR3, ZBTB40, TBCK, ZNF708, GRAMD1B
20500767	MIMAT0004603	hsa-miR-125b-2-3p	2.83	2.31	2.77	0.72	1.08	0.41	1.04	0.705987	-1.37	0.417731	21	PUS10, SUPT3H, MSR1, MED6, ACSL3, KCNS2, PPP2R3A, NETO1, DGKH, HLCS, SMAD2, TBC1D2B, MAN2A1, DNM1L, TMEM194A, TECPR2, SSTR3, ZBTB40, TBCK, ZNF708, GRAMD1B
20535873	MI0006394	hsa-mir-1260a	1.91	1.1	1.29	0.23	0.09	0.18	1.53	0.099412	-1.14	0.117329	21	ARL15, ZHX2, GABRA3, ZFP69B, GAB1, OVOL1, NR6A1, HLCS, C1QTNF9, MAP4, TBCEL, SSTR3, PMM2, GRAMD1B, DGKH, TBC1D2B, TBCK, TECPR2, MYO5A, ZBTB40, KCNH5
20506852	MIMAT0005911	hsa-miR-1260a	1.31	1.83	3.13	0.38	0.45	0.77	-3.52	0.073025	-2.47	0.186365	21	ARL15, ZHX2, GABRA3, ZFP69B, GAB1, OVOL1, NR6A1, HLCS, C1QTNF9, MAP4, TBCEL, SSTR3, PMM2, GRAMD1B, DGKH, TBC1D2B, TBCK, TECPR2, MYO5A, ZBTB40, KCNH5
20535885	MI0006404	hsa-mir-1267	0.94	1.42	0.9	0.17	0.41	0.19	1.03	0.297237	1.44	0.132736	16	SIRT4, C5AR2, MAN2A1, C1QTNF9, STAG1, QPCT, ZFP69B, MED6, TBCK, ZNF708, ZBTB40, DGKH, SMAD2, TMEM194A, GRAMD1B, ROBO1
20517910	MIMAT0018079	hsa-miR-1273e	0.86	1.16	0.78	0.13	0.14	0.33	1.06	0.901094	1.3	0.729181	16	GAB1, GPR89A, ZFP69B, GABRA3, INCA1, CDKAL1, ROBO1, SYT1, ZNF708, PPP2R3A, HS6ST2, KCNH5, ZBTB40, SMAD2, QPCT, NETO1
20529132	MIMAT0030415	hsa-miR-1273h-5p	1.98	1.04	1.13	0.2	0.41	0.48	1.8	0.130298	-1.06	0.512143	30	CDKAL1, PMM2, ZFP69B, SLC39A11, C1QTNF9, ARL15, MAP4, MYO5A, C5AR2, NR6A1, GRAMD1B, HS6ST2, TBC1D2B, PPP2R3A, OSR1, SSTR3, TMEM194A, ZHX2, OVOL1, SMAD2, DNM1L, ZBTB40, ZNF708, TECPR2, HLCS, DGKH, TUSC3, USP32, QPCT, GPR125
20506873	MIMAT0005930	hsa-miR-1276	0.99	1.24	0.81	0.25	0.24	0.15	1.13	0.659966	1.35	0.043579	17	SYT1, KCNS2, GRAMD1B, MEI4, MYO5A, TMEM194A, DGKH, SMAD2, KCNH5, CDKAL1, MAN2A1, TBCK, ACSL3, TBCEL, ZNF708, ROBO1, NETO1
20506813	MIMAT0005876	hsa-miR-1285-3p	4.58	2.46	3.34	0.41	0.42	1.05	2.36	0.430716	-1.84	0.305932	20	CDKAL1, GABRA3, ZFP69B, PMM2, GNMT, C5AR2, SLC39A11, KCNS2, OVOL1, MAP4, GRAMD1B, NR6A1, TECPR2, TBC1D2B, ZNF708, TMEM194A, ZHX2, ZBTB40, SUPT3H, SMAD2
20506819	MIMAT0005881	hsa-miR-1291	0.83	1.21	0.65	0.07	0.34	0.31	1.14	0.807227	1.48	0.246236	15	GNMT, MAP4, OVOL1, C5AR2, GPR89A, MSR1, SSTR3, GRAMD1B, TBCEL, MEI4, SYT1, ZFP69B, TBCK, TECPR2, DGKH
20506822	MIMAT0005884	hsa-miR-1294	1.04	0.79	0.62	0.19	0.34	0.16	1.34	0.230302	1.12	0.76999	16	TECPR2, PUS10, CDH10, ROBO1, KIR3DL2, ZNF708, HLCS, MYO5A, TUSC3, GRAMD1B, DNM1L, SUPT3H, MED6, SMAD2, ZBTB40, QPCT
20535836	MI0006359	hsa-mir-1299	2.11	2.24	1.82	0.34	0.31	0.93	1.22	0.610299	1.33	0.722661	27	PMM2, TMEM194A, ZFP69B, SIRT4, CDKAL1, MAN2A1, TBCEL, MSR1, KCNH5, C1QTNF9, GABRA3, HLCS, ARL15, TBCK, SYT1, TECPR2, C5AR2, TBC1D2B, PPP2R3A, OVOL1, DNM1L, SMAD2, DGKH, MED6, MYO5A, ZNF708, NETO1
20506828	MIMAT0005891	hsa-miR-1303	4.96	4.72	5.21	0.8	1.62	0.43	-1.19	0.281337	-1.41	0.38478	22	L3HYPDH, MAN2A1, MEI4, ZFP69B, NR6A1, CDKAL1, ROBO1, DGKH, KCNH5, ZNF708, USP32, DNM1L, TBCK, MYO5A, KCNS2, TBCEL, ACSL3, TUSC3, GAB1, GRAMD1B, NETO1, MED6
20506829	MIMAT0005892	hsa-miR-1304-5p	1.37	1.22	2.61	0.56	1.06	0.64	-2.36	0.192519	-2.61	0.654796	18	PPP2R3A, CDKAL1, ZFP69B, TBCK, SSTR3, GAB1, TECPR2, ZNF708, SYT1, ARL15, TUSC3, KCNH5, MYO5A, MAP4, TMEM194A, MED6, SMAD2, NETO1
20501180	MIMAT0004680	hsa-miR-130b-5p	4.15	3.95	4.34	0.7	1.36	1.59	-1.14	0.810316	-1.31	0.44187	22	ZFP69B, MEI4, SLC39A11, GPR89A, ZBTB40, KCNS2, SYT1, GRAMD1B, MED6, MYO5A, ZNF708, DNM1L, TMEM194A, KCNH5, TBC1D2B, GABRA3, MAN2A1, USP32, DGKH, ACSL3, HLCS, SMAD2
20507093	MIMAT0005952	hsa-miR-1321	0.97	0.59	1.18	0.19	0.19	0.2	-1.15	0.097857	-1.5	0.002901	17	COL28A1, NR6A1, CDKAL1, TBCEL, MAP4, GABRA3, HLCS, PMM2, PPP2R3A, MYO5A, TMEM194A, DGKH, GRAMD1B, TBC1D2B, ZBTB40, SUPT3H, SMAD2
20535445	MI0003786	hsa-mir-1323	0.98	1.08	1.85	0.24	0.22	0.58	-1.84	0.203527	-1.71	0.409172	23	DGKH, TBCEL, GPR125, MAN2A1, HS6ST2, ZNF708, MYO5A, KCNH5, GRAMD1B, SUPT3H, PMM2, SLC39A11, TBCK, TBC1D2B, C5AR2, ZFP69B, SMAD2, USP32, TUSC3, ACSL3, EFHC2, ROBO1, NETO1
20504568	MIMAT0005795	hsa-miR-1323	2.14	2.48	1.58	0.6	0.72	0.91	1.47	0.945204	1.85	0.491006	23	DGKH, TBCEL, GPR125, MAN2A1, HS6ST2, ZNF708, MYO5A, KCNH5, GRAMD1B, SUPT3H, PMM2, SLC39A11, TBCK, TBC1D2B, C5AR2, ZFP69B, SMAD2, USP32, TUSC3, ACSL3, EFHC2, ROBO1, NETO1
20519495	MIMAT0019776	hsa-miR-1343-3p	5.93	5.79	5.5	0.12	1.9	0.37	1.35	0.289943	1.22	0.411001	21	MAN2A1, KCNS2, GRAMD1B, TBCK, TMEM194A, PMM2, COL28A1, TBCEL, ZNF708, NR6A1, ZFP69B, SLC39A11, TECPR2, DGKH, MEI4, PPP2R3A, MAP4, KCNH5, ZBTB40, SMAD2, GAB1
20534596	MI0000455	hsa-mir-138-2	1.26	1.17	0.74	0.37	0.05	0.17	1.43	0.196639	1.34	0.051914	23	GPR89A, ZFP69B, USP32, ARL15, TMEM194A, TBCK, GABRA3, HS6ST2, NR6A1, DGKH, MYO5A, TECPR2, GAB1, CDKAL1, MAN2A1, ZNF708, HLCS, GRAMD1B, ACSL3, ZBTB40, SUPT3H, SMAD2, NETO1
20534597	MI0000455	hsa-mir-138-2	1.25	1.13	0.63	0.29	0.02	0.26	1.53	0.233759	1.41	0.143661	23	GPR89A, ZFP69B, USP32, ARL15, TMEM194A, TBCK, GABRA3, HS6ST2, NR6A1, DGKH, MYO5A, TECPR2, GAB1, CDKAL1, MAN2A1, ZNF708, HLCS, GRAMD1B, ACSL3, ZBTB40, SUPT3H, SMAD2, NETO1
20500744	MIMAT0004596	hsa-miR-138-2-3p	0.66	1.05	1.24	0.22	0.21	0.3	-1.49	0.187058	-1.14	0.677662	23	GPR89A, ZFP69B, USP32, ARL15, TMEM194A, TBCK, GABRA3, HS6ST2, NR6A1, DGKH, MYO5A, TECPR2, GAB1, CDKAL1, MAN2A1, ZNF708, HLCS, GRAMD1B, ACSL3, ZBTB40, SUPT3H, SMAD2, NETO1
20500747	MIMAT0004598	hsa-miR-141-5p	1.5	1.1	1.89	0.29	0.09	0.78	-1.31	0.599906	-1.73	0.259407	23	DGKH, SYT1, MAN2A1, SSTR3, TUSC3, GNMT, TMEM194A, OVOL1, GAB1, USP32, MEI4, TBCEL, TBCK, ARL15, TECPR2, NR6A1, ZNF708, MYO5A, MSR1, MED6, SUPT3H, GPR125, NETO1
20500420	MIMAT0004549	hsa-miR-148a-5p	2.01	2.65	1.97	0.99	1.07	0.77	1.03	0.477949	1.6	0.797506	18	HLCS, MEI4, C1QTNF9, TMEM194A, GABRA3, PMM2, DNM1L, KCNH5, TBCEL, DGKH, TBCK, SMAD2, ZNF708, NR6A1, MYO5A, USP32, TUSC3, EFHC2
20518940	MIMAT0019077	hsa-miR-1587	4.41	4.94	5.24	0.34	0.38	0.44	-1.78	0.485648	-1.23	0.032149	20	GABRA3, NR6A1, GRAMD1B, OVOL1, KCNH5, SLC39A11, PMM2, TBCK, TMEM194A, CDKAL1, ZFP69B, TBC1D2B, MEI4, KCNS2, MYO5A, GAB1, SSTR3, TECPR2, ZNF708, SMAD2
20500127	MIMAT0004488	hsa-miR-15a-3p	1.35	1.48	0.93	0.51	0.24	0.47	1.33	0.021674	1.46	0.476997	15	ZFP69B, SSTR3, NR6A1, MAP4, GRAMD1B, SLC39A11, TBC1D2B, ROBO1, KCNH5, USP32, DGKH, SUPT3H, SMAD2, ZBTB40, ZNF708
20500788	MIMAT0004611	hsa-miR-185-3p	4.16	3.63	4.11	1.39	1.32	0.42	1.04	0.839819	-1.4	0.590887	18	GABRA3, GNMT, OVOL1, INCA1, EDDM3B, TECPR2, SSTR3, PMM2, NR6A1, KCNS2, TMEM194A, TBCK, ZHX2, OSR1, ZBTB40, SUPT3H, GRAMD1B, PPP2R3A
20500790	MIMAT0004612	hsa-miR-186-3p	1.24	0.91	0.83	0.27	0.26	0.12	1.32	0.175024	1.05	0.716284	28	DGKH, PUS10, MAN2A1, MED6, HLCS, ZHX2, TBCK, GAB1, GPR125, GRAMD1B, KCNS2, TMEM194A, MYO5A, ZNF708, ARL15, C5AR2, PPP2R3A, SSTR3, ZFP69B, ZBTB40, TBCEL, TBC1D2B, MSR1, DNM1L, TECPR2, ACSL3, SMAD2, NETO1
20500454	MIMAT0004561	hsa-miR-187-5p	1.27	1.62	2.03	0.37	0.14	0.58	-1.7	0.028483	-1.33	0.541578	17	DGKH, GAB1, USP32, C5AR2, TBCK, SYT1, KCNS2, MEI4, ZBTB40, TECPR2, GABRA3, SMAD2, ZNF708, MYO5A, ACSL3, EFHC2, NETO1
20500133	MIMAT0002891	hsa-miR-18a-3p	5.76	4.89	5.27	0.53	0.96	0.35	1.41	0.259856	-1.3	0.46345	17	NR6A1, SLC39A11, SSTR3, ZBTB40, TMEM194A, ZFP69B, GRAMD1B, TBCEL, KCNS2, OVOL1, TBC1D2B, KCNH5, SYT1, ZNF708, DGKH, TECPR2, SMAD2
20509227	MIMAT0007883	hsa-miR-1909-3p	3.44	3.31	4.5	0.6	1.45	1.35	-2.08	0.510767	-2.27	0.648662	23	OVOL1, NR6A1, GABRA3, PMM2, OSR1, KIR3DL2, EDDM3B, NETO1, ARL15, C5AR2, GRAMD1B, TUBA1B, C1QTNF9, SSTR3, PPP2R3A, TECPR2, ZNF708, TBC1D2B, USP32, MYO5A, DGKH, SMAD2, EFHC2
20509229	MIMAT0026917	hsa-miR-1910-3p	4.36	4.99	5.14	0.91	1.74	1.35	-1.72	0.532501	-1.11	0.742576	19	EDDM3B, NR6A1, DNM1L, SSTR3, STAG1, SMAD2, TBCK, ZBTB40, ZNF708, SLC39A11, CDKAL1, GAB1, TBC1D2B, SUPT3H, KCNH5, MYO5A, TBCEL, TUSC3, ACSL3
20509233	MIMAT0007888	hsa-miR-1913	1.21	1.35	0.97	0.36	0.09	0.73	1.18	0.758341	1.3	0.930592	20	SSTR3, C5AR2, TBCEL, TBCK, GRAMD1B, OVOL1, PMM2, TMEM194A, ZFP69B, TECPR2, ZBTB40, TBC1D2B, SLC39A11, MYO5A, OSR1, NR6A1, SMAD2, MAP4, KCNH5, ZNF708
20509234	MIMAT0007889	hsa-miR-1914-5p	1.26	1.44	0.84	0.13	0.78	0.14	1.34	0.048109	1.52	0.347077	18	SSTR3, OVOL1, NR6A1, HLCS, PUS10, TUSC3, INCA1, C5AR2, PMM2, TBCEL, TECPR2, MAP4, ZBTB40, MEI4, MYO5A, MED6, DGKH, GRAMD1B
20509237	MIMAT0007892	hsa-miR-1915-3p	9.23	9	9.47	0.26	0.12	0.37	-1.18	0.731224	-1.38	0.367401	20	SSTR3, OVOL1, MAP4, TBCEL, OSR1, NR6A1, TBCK, ZFP69B, ZHX2, MYO5A, HLCS, DNM1L, PMM2, TECPR2, SMAD2, ZBTB40, USP32, DGKH, ZNF708, L3HYPDH
20500456	MIMAT0004562	hsa-miR-196a-3p	1.26	0.93	1.34	0.06	0.53	0.1	-1.05	0.627724	-1.32	0.52779	20	NR6A1, HS6ST2, ZFP69B, GAB1, KCNH5, OVOL1, KIR3DL2, KCNS2, CDKAL1, MAN2A1, TBCEL, MED6, GRAMD1B, USP32, DGKH, TBC1D2B, ZNF708, ZBTB40, SMAD2, GPR125
20510799	MIMAT0009447	hsa-miR-1972	5.64	4.47	5.06	0.67	0.77	0.43	1.49	0.29605	-1.51	0.334489	15	GPR89A, MAP4, OVOL1, TBCEL, KCNH5, TBCK, ARL15, NR6A1, SMAD2, ZBTB40, SYT1, MYO5A, TECPR2, QPCT, ZNF708
20536018	MI0009986	hsa-mir-1976	1.93	1.3	2.55	0.2	0.36	0.71	-1.54	0.290339	-2.37	0.13088	24	PUS10, C5AR2, MYO5A, COL28A1, PPP2R3A, MED6, DGKH, TBCK, TBC1D2B, ZBTB40, MSR1, MAP4, ZFP69B, HLCS, TECPR2, DNM1L, ZNF708, KCNS2, SSTR3, TBCEL, KCNH5, GRAMD1B, ACSL3, SMAD2
20500136	MIMAT0004491	hsa-miR-19b-1-5p	1.11	1.4	0.55	0.21	0.36	0.6	1.48	0.764194	1.81	0.400661	24	ZFP69B, C1QTNF9, PPP2R3A, QPCT, SYT1, GRAMD1B, MSR1, KCNH5, DGKH, HS6ST2, PMM2, ZBTB40, GAB1, C5AR2, KCNS2, STAG1, ACSL3, MAN2A1, ZNF708, TUSC3, SMAD2, MYO5A, USP32, TBCEL
20519532	MIMAT0019814	hsa-miR-203b-3p	1.62	1.64	1.25	0.29	0.95	0.2	1.3	0.37897	1.31	0.315312	16	ZFP69B, SMAD2, PPP2R3A, TBCK, HLCS, MED6, STAG1, DGKH, MAN2A1, KCNS2, ROBO1, TUSC3, ZNF708, TECPR2, KCNH5, MYO5A
20500416	MIMAT0026474	hsa-miR-208a-5p	1.32	1.5	1.08	0.17	0.37	0.32	1.18	0.59153	1.34	0.12925	26	STAG1, ZFP69B, PPP2R3A, ZNF708, MAN2A1, SYT1, SMAD2, CDH10, NR6A1, KCNS2, TBCEL, KCNH5, MSR1, MEI4, DGKH, HS6ST2, TBCK, GAB1, MYO5A, GRAMD1B, ZBTB40, SUPT3H, TUSC3, ROBO1, EFHC2, NETO1
20500464	MIMAT0026475	hsa-miR-210-5p	1.94	1.02	1.22	0.36	0.35	0.18	1.64	0.020985	-1.15	0.773818	16	ZFP69B, MAP4, C5AR2, TBC1D2B, GRAMD1B, CDKAL1, USP32, TBCK, ZBTB40, SYT1, TECPR2, DGKH, TBCEL, OVOL1, MYO5A, SMAD2
20500467	MIMAT0022694	hsa-miR-211-3p	1.19	1.97	1.47	0.23	0.51	0.11	-1.21	0.150293	1.42	0.29475	16	ZFP69B, TBCEL, KCNS2, OSR1, COL28A1, SSTR3, ARL15, TBC1D2B, NR6A1, ZHX2, PPP2R3A, DGKH, ACSL3, TMEM194A, GRAMD1B, ZBTB40
20536025	MI0010629	hsa-mir-2110	0.73	0.84	1.26	0.27	0.18	0.39	-1.44	0.117147	-1.34	0.188084	18	PMM2, SSTR3, GPR125, ZBTB40, NR6A1, ZFP69B, HLCS, GRAMD1B, MAP4, SYT1, DGKH, TBCK, DNM1L, ACSL3, ZNF708, MED6, TBCEL, NETO1
20535461	MI0003939	hsa-mir-2113	0.81	1.24	1.25	0.08	0.32	0.26	-1.36	0.119055	-1.01	0.583032	20	ARL15, USP32, MEI4, SYT1, PMM2, DGKH, KCNS2, MYO5A, MSR1, STAG1, HLCS, KCNH5, ZNF708, ROBO1, PPP2R3A, ZBTB40, TECPR2, SUPT3H, L3HYPDH, NETO1
20511560	MIMAT0011160	hsa-miR-2116-5p	3.11	2.87	2.24	0.47	1.33	0.54	1.82	0.139156	1.55	0.783283	21	HLCS, TMEM194A, NETO1, GABRA3, ROBO1, MYO5A, ZNF708, KCNS2, NR6A1, TBCK, KCNH5, ACSL3, DGKH, GRAMD1B, HS6ST2, SYT1, MAP4, SMAD2, TECPR2, SUPT3H, TBCEL
20500472	MIMAT0000271	hsa-miR-214-3p	3.01	2.16	1.8	0.53	0.44	0.34	2.3	0.022388	1.29	0.196785	20	SLC39A11, KIR3DL2, MAP4, OSR1, SYT1, NR6A1, SSTR3, TMEM194A, PMM2, MEI4, KCNH5, ZBTB40, TBC1D2B, MYO5A, ZNF708, DGKH, SMAD2, QPCT, GPR125, NETO1
20500143	MIMAT0004495	hsa-miR-22-5p	2.62	1.88	3.53	0.58	0.97	0.84	-1.88	0.549114	-3.15	0.252953	19	NETO1, ZNF708, MEI4, GABRA3, HLCS, DGKH, KCNS2, NR6A1, TMEM194A, GRAMD1B, HS6ST2, ROBO1, SYT1, SMAD2, MAP4, ACSL3, TECPR2, TBCEL, SUPT3H
20500483	MIMAT0004568	hsa-miR-221-5p	4.29	3.01	3.61	1.11	1.42	0.17	1.6	0.396711	-1.52	0.736904	20	ZFP69B, TMEM194A, ZNF708, TECPR2, DRD3, TBC1D2B, NR6A1, COL28A1, MAP4, PMM2, SSTR3, C5AR2, KCNS2, GRAMD1B, DGKH, GAB1, ACSL3, SUPT3H, SMAD2, L3HYPDH
20500485	MIMAT0004569	hsa-miR-222-5p	2.42	2.98	3.17	1.31	0.62	0.55	-1.68	0.247335	-1.14	0.507448	19	ARL15, TMEM194A, MSR1, ZFP69B, ROBO1, MYO5A, TBCK, MEI4, NR6A1, HLCS, TUSC3, NETO1, SMAD2, ZNF708, TBCEL, GAB1, PPP2R3A, KCNH5, L3HYPDH
20500490	MIMAT0009198	hsa-miR-224-3p	5.09	3.52	3.94	0.53	1.28	0.76	2.21	0.013544	-1.34	0.80828	27	SLC39A11, ARL15, C1QTNF9, STAG1, MSR1, ACSL3, HS6ST2, PPP2R3A, TBCK, KCNH5, MAN2A1, ZNF708, MYO5A, ZBTB40, TBC1D2B, SYT1, SMAD2, TBCEL, TMEM194A, DGKH, MEI4, GABRA3, HLCS, MED6, SUPT3H, ROBO1, NETO1
20512263	MIMAT0011778	hsa-miR-2278	2.96	3.3	2.29	0.72	1.01	0.27	1.58	0.1414	2.01	0.282598	22	C1QTNF9, INCA1, L3HYPDH, ZFP69B, OVOL1, SLC39A11, TBC1D2B, SYT1, ROBO1, TMEM194A, MYO5A, TBCEL, GRAMD1B, NR6A1, DGKH, KCNH5, PMM2, SUPT3H, SSTR3, SMAD2, ZBTB40, NETO1
20517723	MIMAT0016895	hsa-miR-2355-5p	0.66	1.07	1.07	0.09	0.32	0.16	-1.32	0.011007	1	0.517476	21	STAG1, SLC39A11, SSTR3, ZHX2, ZFP69B, MEI4, HLCS, NR6A1, TBCEL, ACSL3, MAN2A1, TBC1D2B, HS6ST2, ZBTB40, KCNS2, DGKH, TBCK, GRAMD1B, TECPR2, SUPT3H, GPR125
20518903	MIMAT0019043	hsa-miR-2392	2.96	2.96	3.71	0.66	0.6	0.9	-1.69	0.200139	-1.68	0.404783	19	INCA1, ZFP69B, ZBTB40, GABRA3, QPCT, TBC1D2B, MEI4, SLC39A11, KCNH5, STAG1, TBCK, MYO5A, GRAMD1B, ZNF708, TECPR2, SUPT3H, DGKH, SMAD2, GPR125
20513194	MIMAT0013518	hsa-miR-2682-3p	1.05	0.78	1.23	0.08	0.12	0.24	-1.13	0.159003	-1.37	0.054046	23	SSTR3, MAN2A1, OVOL1, KIR3DL2, TMEM194A, ARL15, ZFP69B, MAP4, OSR1, HLCS, ROBO1, KCNS2, MEI4, ZHX2, GRAMD1B, DNM1L, KCNH5, NR6A1, ZBTB40, TBCEL, TECPR2, TBCK, SMAD2
20500155	MIMAT0004500	hsa-miR-26b-3p	2.53	1.42	2.27	0.45	0.22	0.55	1.19	0.02496	-1.81	0.133582	18	TBCEL, SYT1, ZFP69B, KCNS2, NR6A1, TBCK, DGKH, HS6ST2, TMEM194A, PMM2, ZNF708, KCNH5, GRAMD1B, SMAD2, SUPT3H, EFHC2, GPR125, NETO1
20514163	MIMAT0013802	hsa-miR-2861	8.59	8.65	9	0.28	0.28	0.5	-1.33	0.727042	-1.27	0.851388	18	OVOL1, SSTR3, INCA1, MAP4, ZBTB40, NR6A1, PPP2R3A, OSR1, ZFP69B, GABRA3, TBC1D2B, KCNH5, TMEM194A, TECPR2, MYO5A, ZHX2, DGKH, GRAMD1B
20535699	MI0005775	hsa-mir-297	1.04	1.14	1.45	0.14	0.21	0.68	-1.32	0.527399	-1.24	0.787853	18	KIR3DL2, GAB1, L3HYPDH, KCNS2, TBCK, KCNH5, ZFP69B, GABRA3, TBCEL, MEI4, DGKH, HLCS, MYO5A, TUSC3, ZNF708, USP32, SMAD2, ZBTB40
20506022	MIMAT0004450	hsa-miR-297	1.71	1.29	1	1.15	0.48	0.15	1.64	0.23235	1.22	0.288275	18	KIR3DL2, GAB1, L3HYPDH, KCNS2, TBCK, KCNH5, ZFP69B, GABRA3, TBCEL, MEI4, DGKH, HLCS, MYO5A, TUSC3, ZNF708, USP32, SMAD2, ZBTB40
20501217	MIMAT0000716	hsa-miR-302c-5p	1.04	1.1	1.47	0.43	0.22	0.28	-1.35	0.61467	-1.29	0.397676	27	MEI4, COL28A1, OVOL1, KCNH5, TUSC3, PUS10, DGKH, ZFP69B, MAN2A1, ARL15, ZNF708, MSR1, PPP2R3A, TBCK, GAB1, HS6ST2, MYO5A, SYT1, TECPR2, USP32, STAG1, DNM1L, SMAD2, SUPT3H, MED6, NETO1, QPCT
20515618	MIMAT0015066	hsa-miR-3065-5p	5.13	4.31	4.9	0.26	2.02	0.66	1.17	0.712342	-1.51	0.291094	28	KCNH5, DNM1L, ACSL3, ZHX2, ZFP69B, NR6A1, DGKH, HLCS, TBCEL, TECPR2, TBCK, TMEM194A, ROBO1, SMAD2, ZNF708, GAB1, GABRA3, USP32, MAP4, MSR1, TBC1D2B, MEI4, KCNS2, MAN2A1, GRAMD1B, MYO5A, SUPT3H, ZBTB40
20500725	MIMAT0004589	hsa-miR-30b-3p	4.58	3.93	4.97	0.53	0.92	0.45	-1.31	0.766133	-2.06	0.267367	30	CDKAL1, PMM2, ZFP69B, SLC39A11, C1QTNF9, ARL15, MAP4, MYO5A, C5AR2, NR6A1, GRAMD1B, HS6ST2, TBC1D2B, PPP2R3A, OSR1, SSTR3, TMEM194A, ZHX2, OVOL1, SMAD2, DNM1L, ZBTB40, ZNF708, TECPR2, HLCS, DGKH, TUSC3, USP32, QPCT, GPR125
20501161	MIMAT0004674	hsa-miR-30c-1-3p	3.2	1.56	1.31	0.88	0.68	1.35	3.72	0.496792	1.19	0.91413	26	HS6ST2, ARL15, ZFP69B, MYO5A, CDKAL1, MAN2A1, GABRA3, SMAD2, SLC39A11, C5AR2, TBCEL, MEI4, TMEM194A, OSR1, GRAMD1B, KCNH5, STAG1, TBC1D2B, DNM1L, NR6A1, ZBTB40, ACSL3, TUSC3, SUPT3H, ZNF708, QPCT
20501183	MIMAT0000693	hsa-miR-30e-3p	6.33	6.38	6.77	0.48	1.2	0.55	-1.35	0.794915	-1.31	0.17132	24	MYO5A, DNM1L, MSR1, MEI4, PUS10, ROBO1, TMEM194A, TUSC3, ZBTB40, GAB1, HS6ST2, MED6, SYT1, DGKH, KCNH5, USP32, TBCK, STAG1, SMAD2, HLCS, ZNF708, TBC1D2B, CDKAL1, ACSL3
20515514	MIMAT0019198	hsa-miR-3120-5p	1.69	1.91	2.34	0.16	1.1	0.42	-1.57	0.1218	-1.35	0.752431	15	SYT1, MED6, TBCK, SLC39A11, ARL15, GRAMD1B, C5AR2, TBC1D2B, DGKH, SSTR3, ZBTB40, HLCS, NR6A1, ZNF708, TBCEL
20515517	MIMAT0014983	hsa-miR-3121-3p	0.95	1.45	0.89	0.02	0.1	0.2	1.04	0.719182	1.48	0.069026	26	ARL15, MSR1, SYT1, C5AR2, DGKH, NETO1, HS6ST2, KIR3DL2, GPR125, OVOL1, ZFP69B, TBCK, ZNF708, ROBO1, TBC1D2B, MAN2A1, MEI4, KCNH5, NR6A1, SUPT3H, ACSL3, MED6, TBCEL, SMAD2, GRAMD1B, EFHC2
20515518	MIMAT0014984	hsa-miR-3122	1.08	1.35	0.91	0.22	0.35	0.3	1.13	0.590037	1.36	0.477401	23	SMAD2, C1QTNF9, KCNS2, GRAMD1B, ARL15, TBC1D2B, NR6A1, KCNH5, ZFP69B, NETO1, DGKH, CDKAL1, GAB1, ZNF708, ZBTB40, MYO5A, HS6ST2, C5AR2, TMEM194A, SUPT3H, TUSC3, DNM1L, QPCT
20515526	MIMAT0014990	hsa-miR-3127-5p	2.11	2.25	1.73	0.46	0.5	0.3	1.3	0.237826	1.42	0.153183	16	MSR1, USP32, TBCK, COL28A1, TBC1D2B, MED6, NR6A1, ZFP69B, MAP4, GAB1, KCNS2, TMEM194A, C5AR2, ZNF708, MYO5A, SMAD2
20515531	MIMAT0014995	hsa-miR-3130-5p	3.14	1.2	2.84	0.92	0.26	1.31	1.23	0.629818	-3.12	0.230657	18	TMEM194A, CFC1B, ZHX2, TBC1D2B, KCNS2, TBCEL, HS6ST2, SSTR3, NR6A1, DGKH, GAB1, SUPT3H, MYO5A, ZNF708, GRAMD1B, MED6, ZBTB40, GPR125
20515560	MIMAT0015019	hsa-miR-3147	3.95	2.64	3.94	0.17	0.54	0.44	1	0.452415	-2.47	0.207125	16	CDKAL1, KCNS2, C1QTNF9, ARL15, TBC1D2B, NR6A1, DGKH, NETO1, SSTR3, KCNH5, MYO5A, SMAD2, ZNF708, GAB1, GRAMD1B, TECPR2
20536243	MI0014176	hsa-mir-3149	1.09	1.51	1.49	0.23	0.65	0.25	-1.32	0.262488	1.01	0.53222	29	L3HYPDH, SUPT3H, GABRA3, PUS10, QPCT, KIR3DL2, MED6, ZFP69B, COL28A1, NETO1, TBCK, C5AR2, MEI4, DGKH, GAB1, KCNH5, SYT1, MSR1, HLCS, ZNF708, USP32, PPP2R3A, SMAD2, MYO5A, TECPR2, DNM1L, ACSL3, ZBTB40, EFHC2
20515566	MIMAT0015024	hsa-miR-3151-5p	1.19	2.06	1.45	0.25	0.04	0.35	-1.2	0.473882	1.53	0.068171	16	GNMT, MAP4, NR6A1, ZHX2, SSTR3, KCNS2, DGKH, TECPR2, ZBTB40, TBC1D2B, GRAMD1B, USP32, DNM1L, MYO5A, EFHC2, SMAD2
20536248	MI0014180	hsa-mir-3153	1.67	2	1.34	0.76	0.33	0.43	1.26	0.363256	1.58	0.054046	23	INCA1, DGKH, ZFP69B, TMEM194A, ARL15, GAB1, GABRA3, KCNS2, TBCEL, STAG1, GRAMD1B, MYO5A, NR6A1, DNM1L, ACSL3, MEI4, TBC1D2B, SUPT3H, MAP4, SMAD2, SYT1, MED6, NETO1
20515574	MIMAT0015029	hsa-miR-3155a	0.65	1.26	0.85	0.08	0.6	0.23	-1.15	0.224455	1.33	0.512122	16	ARL15, OSR1, OVOL1, NR6A1, MED6, TBC1D2B, TMEM194A, GAB1, GABRA3, KCNS2, TECPR2, HS6ST2, ZNF708, DGKH, GRAMD1B, SMAD2
20536749	MI0016839	hsa-mir-3155b	1.6	2.25	2.08	0.05	0.56	0.39	-1.39	0.294723	1.12	0.896408	16	ARL15, OSR1, OVOL1, NR6A1, MED6, TBC1D2B, TMEM194A, GAB1, GABRA3, KCNS2, TECPR2, HS6ST2, ZNF708, DGKH, GRAMD1B, SMAD2
20536750	MI0016839	hsa-mir-3155b	1.81	2.8	1.71	0.18	0.88	0.37	1.07	0.459696	2.13	0.487975	16	ARL15, OSR1, OVOL1, NR6A1, MED6, TBC1D2B, TMEM194A, GAB1, GABRA3, KCNS2, TECPR2, HS6ST2, ZNF708, DGKH, GRAMD1B, SMAD2
20515579	MIMAT0019211	hsa-miR-3158-5p	1.07	1.06	1.78	0.6	0.37	0.66	-1.64	0.538917	-1.65	0.358038	16	HLCS, ARL15, KIR3DL2, MAP4, PMM2, TBCEL, NR6A1, DGKH, TECPR2, TMEM194A, MSR1, SMAD2, OSR1, KCNH5, TBCK, ZBTB40
20536268	MI0014191	hsa-mir-3161	0.85	1.3	0.87	0.27	0.2	0.35	-1.01	0.698962	1.35	0.405172	23	ARL15, GPR89A, MEI4, PUS10, SYT1, GAB1, MAN2A1, STAG1, PPP2R3A, HS6ST2, DGKH, TBCEL, KCNH5, SLC39A11, TBCK, KCNS2, ACSL3, MYO5A, ZNF708, TUSC3, SMAD2, ROBO1, NETO1
20515590	MIMAT0015040	hsa-miR-3166	0.94	2.59	1.47	0.15	0.37	0.09	-1.44	0.016384	2.18	0.052746	17	PAGE3, ARL15, KIR3DL2, TBCK, ZNF708, ZBTB40, SYT1, NR6A1, OSR1, SUPT3H, TBCEL, SLC39A11, GAB1, DGKH, MED6, GRAMD1B, GPR125
20515597	MIMAT0019214	hsa-miR-3173-5p	0.84	1	1.23	0.21	0.25	0.48	-1.32	0.374008	-1.18	0.628362	15	OVOL1, TBCEL, TMEM194A, SSTR3, TBC1D2B, MEI4, ZBTB40, SLC39A11, HS6ST2, TECPR2, GRAMD1B, DGKH, NR6A1, TBCK, TUSC3
20515603	MIMAT0015052	hsa-miR-3175	4.13	3.27	4.28	0.41	0.86	0.12	-1.11	0.201919	-2	0.203374	16	MAP4, GABRA3, SLC39A11, GRAMD1B, ZHX2, MYO5A, TBC1D2B, NR6A1, SSTR3, KCNS2, GAB1, OVOL1, DGKH, ZBTB40, HLCS, SMAD2
20515604	MIMAT0015053	hsa-miR-3176	1.83	2.36	1.88	0.34	1.18	0.5	-1.04	0.559658	1.39	0.517023	20	SSTR3, GPR89A, SYT1, ZFP69B, PMM2, TMEM194A, NR6A1, KCNS2, TBCEL, USP32, TBCK, TBC1D2B, HLCS, TECPR2, GRAMD1B, ZBTB40, DGKH, ZNF708, MYO5A, SMAD2
20536299	MI0014225	hsa-mir-3183	0.93	1.13	1.44	0.12	0.13	0.29	-1.43	0.192463	-1.24	0.52522	24	OSR1, GPR89A, C5AR2, MAN2A1, TBCK, GRAMD1B, OVOL1, ZFP69B, HLCS, MAP4, MEI4, SLC39A11, ZBTB40, SYT1, MYO5A, NR6A1, ZHX2, TBC1D2B, KCNH5, ACSL3, TECPR2, DGKH, SMAD2, SUPT3H
20515614	MIMAT0015063	hsa-miR-3183	0.68	1.25	0.72	0.19	0.19	0.11	-1.03	0.696296	1.45	0.068575	24	OSR1, GPR89A, C5AR2, MAN2A1, TBCK, GRAMD1B, OVOL1, ZFP69B, HLCS, MAP4, MEI4, SLC39A11, ZBTB40, SYT1, MYO5A, NR6A1, ZHX2, TBC1D2B, KCNH5, ACSL3, TECPR2, DGKH, SMAD2, SUPT3H
20515623	MIMAT0015069	hsa-miR-3187-3p	4.41	5.19	4.96	0.34	1.19	0.27	-1.46	0.362352	1.17	0.734525	17	GABRA3, MAN2A1, PUS10, TBC1D2B, OSR1, ARL15, ZFP69B, MAP4, PMM2, TMEM194A, ROBO1, MYO5A, DGKH, TBCK, KCNH5, SMAD2, ZNF708
20515622	MIMAT0019216	hsa-miR-3187-5p	1.32	2.18	2.09	0.25	0.15	0.36	-1.7	0.198381	1.06	0.700616	20	CDKAL1, GABRA3, ZFP69B, PMM2, GNMT, C5AR2, SLC39A11, KCNS2, OVOL1, MAP4, GRAMD1B, NR6A1, TECPR2, TBC1D2B, ZNF708, TMEM194A, ZHX2, ZBTB40, SUPT3H, SMAD2
20536306	MI0014232	hsa-mir-3188	0.95	0.86	1.31	0.11	0.22	0.11	-1.28	0.087585	-1.37	0.178472	17	GNMT, HLCS, ZHX2, CDKAL1, ZFP69B, STAG1, TBC1D2B, MAP4, TBCK, SMAD2, KCNS2, TECPR2, MYO5A, TBCEL, TUSC3, GRAMD1B, SUPT3H
20515624	MIMAT0015070	hsa-miR-3188	1.27	2.31	1.41	0.69	0.63	0.14	-1.1	0.538861	1.87	0.277881	17	GNMT, HLCS, ZHX2, CDKAL1, ZFP69B, STAG1, TBC1D2B, MAP4, TBCK, SMAD2, KCNS2, TECPR2, MYO5A, TBCEL, TUSC3, GRAMD1B, SUPT3H
20515626	MIMAT0015071	hsa-miR-3189-3p	0.75	1.14	1.13	0.26	0.37	0.17	-1.3	0.408884	1.01	0.497801	15	SSTR3, KCNH5, STAG1, PPP2R3A, SYT1, ZBTB40, NR6A1, DNM1L, TUSC3, HLCS, SMAD2, MAN2A1, MYO5A, TBCEL, DGKH
20515625	MIMAT0019217	hsa-miR-3189-5p	1.4	1.12	0.94	0.26	0.29	0.29	1.38	0.233943	1.13	0.100276	15	SSTR3, NR6A1, PMM2, GPR89A, TBC1D2B, ZBTB40, TBCEL, TECPR2, SMAD2, DGKH, ZNF708, GRAMD1B, MYO5A, TUSC3, L3HYPDH
20515633	MIMAT0027027	hsa-miR-3192-3p	1.31	1.81	1.27	0.25	0.66	0.65	1.03	0.466908	1.45	0.878948	23	ARL15, QPCT, HS6ST2, MAN2A1, GABRA3, MSR1, ROBO1, ZFP69B, C5AR2, DGKH, TBCK, MYO5A, GRAMD1B, KCNH5, SSTR3, SMAD2, C1QTNF9, KCNS2, PPP2R3A, GAB1, ZNF708, SUPT3H, NETO1
20515636	MIMAT0019218	hsa-miR-3194-3p	1.6	0.89	1.1	0.19	0.51	0.31	1.42	0.238115	-1.16	0.836257	15	TECPR2, GRAMD1B, DGKH, NR6A1, GABRA3, ZBTB40, TBCK, GAB1, ZNF708, USP32, ZFP69B, PPP2R3A, MAP4, KCNH5, NETO1
20515644	MIMAT0017392	hsa-miR-3200-5p	3.42	4.43	3.26	0.57	1.32	0.79	1.12	0.226195	2.25	0.970453	15	MEI4, ACSL3, HLCS, KCNS2, ZFP69B, PPP2R3A, HS6ST2, KCNH5, TMEM194A, GAB1, DGKH, MYO5A, TECPR2, SMAD2, MED6
20536308	MI0014234	hsa-mir-320e	7.49	8.21	7.81	0.18	0.79	0.37	-1.25	0.98259	1.32	0.443691	20	PUS10, TUBA1B, TMEM194A, ZFP69B, MED6, TUSC3, SSTR3, DGKH, MYO5A, ZNF708, MAP4, TECPR2, TBC1D2B, TBCEL, GRAMD1B, KCNH5, ZBTB40, DNM1L, L3HYPDH, SMAD2
20500443	MIMAT0004557	hsa-miR-34a-3p	3.87	2.48	1.47	0.92	0.94	0.4	5.28	0.037522	2	0.612067	17	MSR1, MED6, MAN2A1, NETO1, SLC39A11, HS6ST2, KCNS2, MEI4, KCNH5, MYO5A, STAG1, TUSC3, HLCS, DGKH, SUPT3H, SMAD2, GPR125
20501169	MIMAT0004676	hsa-miR-34b-3p	2.15	1.42	1.62	0.57	0.77	0.37	1.45	0.419653	-1.15	0.7436	22	L3HYPDH, ARL15, PMM2, SLC39A11, ACSL3, GAB1, SUPT3H, KCNH5, ROBO1, MEI4, DGKH, ZBTB40, TBCK, SMAD2, ZNF708, MYO5A, MED6, GRAMD1B, TUSC3, QPCT, GPR125, NETO1
20501168	MIMAT0000685	hsa-miR-34b-5p	2.07	1.49	1.65	0.5	0.04	0.38	1.34	0.480141	-1.12	0.534062	23	DNM1L, INCA1, NETO1, ZHX2, SYT1, TBCK, KIR3DL2, GABRA3, MAP4, SSTR3, DGKH, MEI4, MSR1, ZBTB40, TBC1D2B, STAG1, SMAD2, NR6A1, ZNF708, KCNS2, GAB1, TUSC3, MYO5A
20501171	MIMAT0004677	hsa-miR-34c-3p	5.27	5.3	4.76	0.3	0.88	0.05	1.42	0.224097	1.45	0.943717	16	L3HYPDH, ARL15, SYT1, ZFP69B, GAB1, MYO5A, KCNH5, SMAD2, TECPR2, DGKH, ZBTB40, DNM1L, TUSC3, MED6, QPCT, NETO1
20517814	MIMAT0017984	hsa-miR-3607-5p	2.83	1.82	2.39	0.7	0.81	0.35	1.36	0.366979	-1.48	0.869245	16	TBCK, KCNH5, MED6, ZFP69B, GPR89A, ARL15, DGKH, ZNF708, ROBO1, HLCS, USP32, ACSL3, TBCEL, SMAD2, TUSC3, NETO1
20517818	MIMAT0017988	hsa-miR-3611	0.91	0.84	0.45	0.22	0.04	0.08	1.38	0.210973	1.31	0.035192	21	SLC39A11, CDH10, SYT1, PAGE3, MSR1, COL28A1, MEI4, ZFP69B, DGKH, C5AR2, HS6ST2, TBCEL, USP32, ZBTB40, TBCK, KCNH5, GAB1, TECPR2, TBC1D2B, ZNF708, SMAD2
20536564	MI0016061	hsa-mir-3660	0.96	1.13	0.73	0.2	0.27	0.17	1.18	0.190815	1.32	0.426616	19	PPP2R3A, ROBO1, TBCEL, NETO1, MYO5A, MEI4, SSTR3, MAN2A1, NR6A1, PMM2, ACSL3, KCNS2, GRAMD1B, KCNH5, TBCK, USP32, ZBTB40, TBC1D2B, MED6
20536566	MI0016063	hsa-mir-3662	1.25	1.07	0.86	0.34	0.36	0.06	1.31	0.407792	1.16	0.449659	39	ARL15, PUS10, DGKH, SIRT4, QPCT, ROBO1, EFHC2, KCNH5, C1QTNF9, HS6ST2, ZFP69B, TBCK, SYT1, CDH10, MEI4, GPR89A, MSR1, MAN2A1, ZNF708, C5AR2, NR6A1, PPP2R3A, STAG1, TBCEL, HLCS, GAB1, OVOL1, SSTR3, NETO1, USP32, ACSL3, COL28A1, SMAD2, TMEM194A, SUPT3H, MYO5A, ZBTB40, TECPR2, TUSC3
20517922	MIMAT0018090	hsa-miR-3667-3p	1.12	1.91	1.38	0.8	0.42	0.07	-1.2	0.687933	1.44	0.359353	23	SSTR3, ARL15, MYO5A, PMM2, COL28A1, TMEM194A, MAN2A1, SLC39A11, HLCS, TBCEL, HS6ST2, MAP4, GRAMD1B, TBCK, KCNH5, OVOL1, ZNF708, NR6A1, ZHX2, KCNS2, ZBTB40, L3HYPDH, GPR125
20536575	MI0016072	hsa-mir-3671	1.13	0.87	0.63	0.26	0.49	0.07	1.41	0.087434	1.18	0.292215	30	ZFP69B, PUS10, ROBO1, ZNF708, SMAD2, GAB1, CDH10, ARL15, TMEM194A, TBCK, KCNH5, DGKH, COL28A1, MAN2A1, STAG1, KCNS2, NR6A1, ACSL3, SYT1, MSR1, ZHX2, CDKAL1, PPP2R3A, SUPT3H, HLCS, TBCEL, MYO5A, GRAMD1B, USP32, NETO1
20536578	MI0016075	hsa-mir-3674	1.04	1.25	0.87	0.28	0.16	0.35	1.13	0.571795	1.3	0.421524	16	ZNF708, TUSC3, MEI4, MAN2A1, ZFP69B, TMEM194A, HS6ST2, TBCEL, ROBO1, CDKAL1, STAG1, KCNH5, DGKH, PPP2R3A, GRAMD1B, MYO5A
20517929	MIMAT0018097	hsa-miR-3674	1.43	1.09	0.93	0.29	0.38	0.19	1.41	0.198699	1.12	0.175807	16	ZNF708, TUSC3, MEI4, MAN2A1, ZFP69B, TMEM194A, HS6ST2, TBCEL, ROBO1, CDKAL1, STAG1, KCNH5, DGKH, PPP2R3A, GRAMD1B, MYO5A
20517932	MIMAT0019221	hsa-miR-3677-5p	1.12	0.87	0.71	0.34	0.23	0.17	1.34	0.388913	1.12	0.582624	16	GRAMD1B, MSR1, SLC39A11, TBC1D2B, TMEM194A, CDKAL1, NR6A1, TBCK, OVOL1, DGKH, ZBTB40, KCNH5, MYO5A, TECPR2, ZNF708, QPCT
20517955	MIMAT0019224	hsa-miR-3691-3p	1.73	1.55	1.25	0.2	0.6	0.55	1.39	0.603905	1.23	0.891275	15	SLC39A11, SSTR3, GAB1, TBCK, PPP2R3A, MEI4, DNM1L, SYT1, ZHX2, ZBTB40, MAP4, GRAMD1B, DGKH, HLCS, GPR125
20501242	MIMAT0000731	hsa-miR-378a-5p	6.01	5.16	5.5	1.19	1.42	0.37	1.42	0.802233	-1.27	0.369815	20	ARL15, HS6ST2, OR8B8, SSTR3, GAB1, C5AR2, NR6A1, MAP4, GABRA3, PPP2R3A, DGKH, TUSC3, TBCK, TMEM194A, KCNH5, ZNF708, KCNS2, ZBTB40, MED6, SMAD2
20536601	MI0016410	hsa-mir-3907	1.14	1.71	2.12	0.84	0.16	0.37	-1.97	0.268105	-1.32	0.587938	16	ARL15, GRAMD1B, INCA1, GPR125, ZBTB40, MSR1, MAP4, DGKH, MEI4, HLCS, TBCK, NR6A1, DNM1L, ACSL3, TMEM194A, ZNF708
20518426	MIMAT0018179	hsa-miR-3907	1.78	1.2	2.11	0.33	0.55	0.34	-1.26	0.230274	-1.88	0.354426	16	ARL15, GRAMD1B, INCA1, GPR125, ZBTB40, MSR1, MAP4, DGKH, MEI4, HLCS, TBCK, NR6A1, DNM1L, ACSL3, TMEM194A, ZNF708
20536605	MI0016413	hsa-mir-3909	1.12	1.07	1.58	0.13	0.46	0.32	-1.37	0.459578	-1.42	0.800264	15	TBC1D2B, ZFP69B, C1QTNF9, SSTR3, SLC39A11, TBCK, DGKH, TECPR2, ZHX2, NR6A1, GRAMD1B, ZBTB40, QPCT, ROBO1, NETO1
20518431	MIMAT0018184	hsa-miR-3910	0.91	1.4	0.91	0.29	0.37	0.25	-1	0.244813	1.41	0.425497	20	SIRT4, ARL15, TMEM194A, GPR89A, ZFP69B, MEI4, TBCK, MAN2A1, DGKH, TECPR2, NR6A1, KCNS2, ZHX2, HLCS, GRAMD1B, TBC1D2B, MYO5A, MED6, ACSL3, GPR125
20518439	MIMAT0018190	hsa-miR-3916	2.3	1.9	1.8	0.3	0.1	0.61	1.41	0.456648	1.07	0.803308	20	ARL15, OVOL1, SLC39A11, MED6, ROBO1, NR6A1, SSTR3, HS6ST2, KCNS2, TMEM194A, MYO5A, DGKH, ZNF708, SYT1, GRAMD1B, ACSL3, TECPR2, TUSC3, TBCEL, SMAD2
20518446	MIMAT0018196	hsa-miR-3921	4.61	4.23	3.98	0.18	0.46	0.59	1.55	0.385627	1.19	0.726061	20	OR2D2, ZFP69B, HLCS, GPR89A, PPP2R3A, SLC39A11, ZNF708, KCNH5, SSTR3, TECPR2, L3HYPDH, USP32, NR6A1, TBC1D2B, TBCK, ZBTB40, MYO5A, DGKH, ROBO1, NETO1
20536630	MI0016432	hsa-mir-3924	0.81	0.83	1.32	0.2	0.15	0.3	-1.42	0.111848	-1.4	0.350202	27	L3HYPDH, MEI4, HS6ST2, DGKH, EDDM3B, C1QTNF9, ARL15, KCNH5, GRAMD1B, TMEM194A, GAB1, TBCK, SYT1, KCNS2, TBCEL, DNM1L, SLC39A11, ZNF708, SMAD2, USP32, MED6, TUSC3, ACSL3, EFHC2, QPCT, ROBO1, NETO1
20518459	MIMAT0018205	hsa-miR-3928-3p	4.82	5.36	5.48	0.19	1.68	0.34	-1.57	0.160502	-1.08	0.369256	21	ACSL3, NR6A1, SSTR3, TBCEL, CDKAL1, KIR3DL2, KCNS2, TBC1D2B, MYO5A, SUPT3H, DNM1L, MED6, SYT1, DGKH, USP32, ZNF708, SMAD2, TUSC3, GRAMD1B, QPCT, NETO1
20518458	MIMAT0027037	hsa-miR-3928-5p	1.65	2.54	1.9	0.36	0.76	0.59	-1.19	0.383103	1.56	0.844066	15	TUBA1B, PUS10, TBCEL, PPP2R3A, ZBTB40, DNM1L, USP32, DGKH, GAB1, KCNH5, GRAMD1B, SSTR3, TECPR2, MYO5A, NETO1
20518460	MIMAT0018206	hsa-miR-3929	2.06	1.38	1.69	0.31	0.59	0.65	1.3	0.530772	-1.24	0.51058	19	KIR3DL2, MSR1, TMEM194A, CDKAL1, OSR1, PMM2, C5AR2, SLC39A11, TBC1D2B, ZNF708, PPP2R3A, SSTR3, NR6A1, TBCEL, KCNH5, SYT1, GRAMD1B, SMAD2, SUPT3H
20518621	MIMAT0018349	hsa-miR-3934-5p	5.18	4.29	4.97	0.27	1.87	0.73	1.16	0.223449	-1.6	0.618841	17	ZFP69B, STAG1, GPR89A, OVOL1, MEI4, DGKH, ZBTB40, MAP4, TBC1D2B, KCNH5, SSTR3, SMAD2, ZNF708, SUPT3H, DNM1L, GRAMD1B, NETO1
20518632	MIMAT0018358	hsa-miR-3942-5p	1.42	0.99	0.89	0.14	0.1	0.05	1.44	0.03204	1.07	0.133121	18	MSR1, MED6, L3HYPDH, MEI4, HS6ST2, KCNH5, TBCK, ZBTB40, SSTR3, DGKH, ZNF708, GRAMD1B, MYO5A, ACSL3, SUPT3H, SMAD2, ROBO1, NETO1
20536846	MI0016992	hsa-mir-3974	1.22	0.76	0.78	0.13	0.72	0.26	1.36	0.419394	-1.01	0.675799	18	TBCEL, PPP2R3A, PMM2, C5AR2, MAN2A1, STAG1, KCNH5, GAB1, MEI4, GRAMD1B, ZBTB40, ZNF708, HLCS, SMAD2, SSTR3, DGKH, TBC1D2B, NETO1
20519076	MIMAT0019359	hsa-miR-3974	0.91	1.26	0.87	0.24	0.3	0.31	1.03	0.551384	1.31	0.187746	18	TBCEL, PPP2R3A, PMM2, C5AR2, MAN2A1, STAG1, KCNH5, GAB1, MEI4, GRAMD1B, ZBTB40, ZNF708, HLCS, SMAD2, SSTR3, DGKH, TBC1D2B, NETO1
20519079	MIMAT0019362	hsa-miR-3977	0.54	1.11	0.95	0.02	0.22	0.3	-1.33	0.095889	1.11	0.785491	18	MAN2A1, MEI4, CFC1B, DGKH, SYT1, OVOL1, TBC1D2B, SMAD2, KCNS2, USP32, TBCK, HLCS, TMEM194A, GABRA3, NR6A1, ZNF708, GRAMD1B, GAB1
20536472	MI0015861	hsa-mir-4251	0.99	0.92	1.32	0.12	0.41	0.14	-1.26	0.194795	-1.32	0.42982	28	MEI4, HLCS, TBCK, DGKH, PPP2R3A, STAG1, C5AR2, CDKAL1, TMEM194A, TBC1D2B, TBCEL, MYO5A, USP32, NR6A1, ZHX2, GRAMD1B, SLC39A11, PMM2, SMAD2, ZBTB40, ACSL3, TUSC3, TECPR2, ZNF708, SUPT3H, OVOL1, NETO1, GPR125
20536475	MI0015864	hsa-mir-4252	0.85	1.05	1.67	0.42	0.35	0.63	-1.76	0.535144	-1.53	0.668636	20	MEI4, OVOL1, MAN2A1, CDKAL1, TBC1D2B, HS6ST2, MSR1, TECPR2, ZBTB40, TMEM194A, DGKH, ZNF708, C5AR2, KCNH5, TBCK, USP32, ZFP69B, SMAD2, NR6A1, QPCT
20517714	MIMAT0016886	hsa-miR-4252	0.96	1.33	0.86	0.09	0.27	0.22	1.07	0.578653	1.39	0.383803	20	MEI4, OVOL1, MAN2A1, CDKAL1, TBC1D2B, HS6ST2, MSR1, TECPR2, ZBTB40, TMEM194A, DGKH, ZNF708, C5AR2, KCNH5, TBCK, USP32, ZFP69B, SMAD2, NR6A1, QPCT
20517710	MIMAT0016882	hsa-miR-4253	1.71	1.75	1.26	0.55	0.48	0.25	1.36	0.993279	1.4	0.072447	16	CDKAL1, C5AR2, GRAMD1B, MAP4, HLCS, MSR1, STAG1, GABRA3, DGKH, KCNS2, OVOL1, TBC1D2B, KCNH5, TECPR2, SMAD2, MED6
20536467	MI0015856	hsa-mir-4257	1.17	1.57	1.19	0.1	0.6	0.18	-1.02	0.878217	1.3	0.271191	20	C5AR2, INCA1, OVOL1, TBC1D2B, TMEM194A, TBCK, CDKAL1, DGKH, KCNH5, ZNF708, MAP4, GRAMD1B, TECPR2, ROBO1, NR6A1, GAB1, MYO5A, ZBTB40, TUSC3, NETO1
20517706	MIMAT0016878	hsa-miR-4257	1.61	1.24	1.04	0.28	0.47	0.74	1.49	0.693708	1.15	0.523408	20	C5AR2, INCA1, OVOL1, TBC1D2B, TMEM194A, TBCK, CDKAL1, DGKH, KCNH5, ZNF708, MAP4, GRAMD1B, TECPR2, ROBO1, NR6A1, GAB1, MYO5A, ZBTB40, TUSC3, NETO1
20536479	MI0015868	hsa-mir-4261	0.9	0.65	1.06	0.38	0.19	0.11	-1.12	0.574759	-1.33	0.135496	21	TMEM194A, ZFP69B, GRAMD1B, SYT1, MAN2A1, GABRA3, HS6ST2, SMAD2, ARL15, PMM2, KCNS2, TBC1D2B, DGKH, NR6A1, STAG1, USP32, SSTR3, ZBTB40, ZNF708, ROBO1, NETO1
20517725	MIMAT0016896	hsa-miR-4268	0.95	1.51	0.96	0.08	0.18	0.16	-1.01	0.390085	1.46	0.104139	15	STAG1, SLC39A11, KCNS2, PMM2, GPR89A, INCA1, CDH10, HLCS, ZBTB40, DNM1L, TECPR2, GRAMD1B, SMAD2, TBCEL, ACSL3
20517726	MIMAT0016897	hsa-miR-4269	1.51	0.77	1.39	0.05	0.45	0.43	1.08	0.90784	-1.54	0.02335	20	ZFP69B, SUPT3H, PUS10, PMM2, OVOL1, DGKH, ZBTB40, ZHX2, SYT1, MAN2A1, MAP4, MYO5A, GAB1, ZNF708, TBC1D2B, TECPR2, HLCS, SMAD2, MED6, ACSL3
20536498	MI0015887	hsa-mir-4279	0.93	1.32	0.82	0.27	0.29	0.25	1.08	0.852063	1.41	0.174816	22	KRT33A, SSTR3, MYO5A, MAP4, GRAMD1B, OSR1, PMM2, NR6A1, TBCK, PPP2R3A, TMEM194A, PUS10, OVOL1, GABRA3, KCNH5, TECPR2, DGKH, SMAD2, KCNS2, ZBTB40, ZNF708, DNM1L
20536511	MI0015900	hsa-mir-4291	1.56	1.08	0.76	0.43	0.15	0.09	1.73	0.162793	1.24	0.154875	18	SYT1, MSR1, SLC39A11, HS6ST2, MEI4, ARL15, TBCK, KCNH5, TBC1D2B, ZBTB40, TBCEL, ZNF708, NR6A1, DGKH, SSTR3, SMAD2, QPCT, GPR125
20517679	MIMAT0016851	hsa-miR-4299	1.49	1.29	1.76	0.76	0.16	0.41	-1.2	0.650183	-1.38	0.248546	15	PAGE3, HS6ST2, ZFP69B, MSR1, NETO1, ZNF708, TMEM194A, GAB1, KCNH5, DGKH, SMAD2, TECPR2, ZBTB40, MED6, ROBO1
20536442	MI0015831	hsa-mir-4300	1.23	0.81	0.8	0.21	0.12	0.12	1.34	0.145921	1.01	0.471329	17	GAB1, C5AR2, ARL15, OSR1, TUBA1B, MAP4, SSTR3, INCA1, PPP2R3A, ZBTB40, MEI4, PMM2, DGKH, NR6A1, DNM1L, GRAMD1B, TBC1D2B
20536439	MI0015828	hsa-mir-4301	1.45	1.2	0.96	0.22	0.12	0.13	1.4	0.252512	1.18	0.177107	17	TUSC3, SSTR3, KCNS2, PMM2, OVOL1, MAP4, TBCEL, SLC39A11, MEI4, KCNH5, GABRA3, ZBTB40, DGKH, TBC1D2B, TECPR2, NR6A1, MYO5A
20517688	MIMAT0016860	hsa-miR-4307	0.82	0.61	0.99	0.06	0.24	0.19	-1.13	0.219469	-1.3	0.192124	35	ZFP69B, ZNF708, ACSL3, HS6ST2, TMEM194A, STAG1, ARL15, KCNH5, KIR3DL2, PUS10, MEI4, GPR125, TBCEL, SYT1, DGKH, QPCT, GAB1, HLCS, GABRA3, ROBO1, TBCK, NETO1, C1QTNF9, PPP2R3A, MAN2A1, MYO5A, SMAD2, MAP4, DNM1L, PMM2, TUSC3, GRAMD1B, L3HYPDH, SUPT3H, EFHC2
20517696	MIMAT0016868	hsa-miR-4314	1.73	3.61	2.88	0.98	1.57	0.88	-2.22	0.344151	1.66	0.411374	25	TUBA1B, GRAMD1B, GABRA3, OSR1, C5AR2, DGKH, NR6A1, STAG1, GAB1, TBCK, KCNS2, OVOL1, TECPR2, HLCS, USP32, SSTR3, KCNH5, TBC1D2B, MYO5A, DNM1L, TBCEL, ZHX2, ZBTB40, SUPT3H, MED6
20536456	MI0015845	hsa-mir-4316	1.38	1.48	0.86	0.55	0.42	0.33	1.44	0.527672	1.53	0.705188	18	DGKH, HLCS, COL28A1, ZHX2, PUS10, TECPR2, CDH10, ZBTB40, KIR3DL2, ZNF708, MYO5A, STAG1, TUSC3, ROBO1, SMAD2, SUPT3H, DNM1L, QPCT
20517701	MIMAT0016873	hsa-miR-4322	0.97	1.36	1.81	0.81	0.08	0.2	-1.79	0.237511	-1.36	0.097218	16	KIR3DL2, GNMT, OVOL1, PMM2, MAP4, KCNS2, TECPR2, GRAMD1B, TBCK, ZFP69B, KCNH5, MYO5A, ZBTB40, GAB1, SMAD2, NETO1
20536513	MI0015902	hsa-mir-4330	1.12	1.46	1	0.21	0.25	0.23	1.09	0.316849	1.38	0.300423	20	MSR1, ARL15, COL28A1, DGKH, TMEM194A, MEI4, MAN2A1, GRAMD1B, ZBTB40, SYT1, SSTR3, KCNH5, NR6A1, ZNF708, USP32, SUPT3H, SMAD2, ROBO1, GPR125, NETO1
20536666	MI0016754	hsa-mir-4418	1.27	1.54	1.79	0.42	0.15	0.16	-1.43	0.138291	-1.19	0.064711	18	TMEM194A, PMM2, ROBO1, ZHX2, SMAD2, MAN2A1, ZNF708, TBCK, KCNS2, MYO5A, MAP4, ZBTB40, DGKH, PPP2R3A, SUPT3H, QPCT, EFHC2, GPR125
20518786	MIMAT0018930	hsa-miR-4418	0.94	1.3	0.73	0.44	0.35	0.11	1.16	0.616039	1.49	0.29207	18	TMEM194A, PMM2, ROBO1, ZHX2, SMAD2, MAN2A1, ZNF708, TBCK, KCNS2, MYO5A, MAP4, ZBTB40, DGKH, PPP2R3A, SUPT3H, QPCT, EFHC2, GPR125
20536667	MI0016755	hsa-mir-4419a	2.62	1.88	1.95	0.47	0.11	0.06	1.59	0.269979	-1.05	0.360048	19	KIR3DL2, SSTR3, MAP4, C1QTNF9, GRAMD1B, ARL15, NR6A1, PMM2, TBCEL, ZFP69B, ZBTB40, TMEM194A, MEI4, KCNH5, TBC1D2B, HLCS, MYO5A, DGKH, SMAD2
20518787	MIMAT0018931	hsa-miR-4419a	2.19	3.22	2.79	0.43	0.94	0.28	-1.52	0.273479	1.34	0.793552	19	KIR3DL2, SSTR3, MAP4, C1QTNF9, GRAMD1B, ARL15, NR6A1, PMM2, TBCEL, ZFP69B, ZBTB40, TMEM194A, MEI4, KCNH5, TBC1D2B, HLCS, MYO5A, DGKH, SMAD2
20518789	MIMAT0018933	hsa-miR-4420	0.78	0.9	1.24	0.08	0.18	0.17	-1.37	0.079771	-1.26	0.018766	22	MED6, MEI4, NETO1, TBCK, TMEM194A, ZFP69B, PPP2R3A, DGKH, MYO5A, C5AR2, KCNS2, SYT1, HLCS, ZBTB40, TBC1D2B, TUSC3, TBCEL, L3HYPDH, ZNF708, SMAD2, ROBO1, QPCT
20536678	MI0016767	hsa-mir-4428	1.4	1.77	1.36	0.36	0.23	0.74	1.03	0.780387	1.32	0.465689	21	NR6A1, GABRA3, MAN2A1, TMEM194A, NETO1, COL28A1, PPP2R3A, SSTR3, C5AR2, DGKH, TBC1D2B, STAG1, TBCK, KCNH5, TBCEL, HLCS, SUPT3H, SMAD2, ZNF708, ACSL3, MED6
20518800	MIMAT0018943	hsa-miR-4428	2.29	3.4	2.12	0.17	1.24	0.28	1.13	0.542066	2.44	0.212933	21	NR6A1, GABRA3, MAN2A1, TMEM194A, NETO1, COL28A1, PPP2R3A, SSTR3, C5AR2, DGKH, TBC1D2B, STAG1, TBCK, KCNH5, TBCEL, HLCS, SUPT3H, SMAD2, ZNF708, ACSL3, MED6
20518805	MIMAT0018948	hsa-miR-4432	1.23	0.99	0.76	0.25	0.23	0.31	1.39	0.093415	1.17	0.490451	17	L3HYPDH, C1QTNF9, ARL15, SYT1, MSR1, TBCK, MEI4, MAN2A1, GRAMD1B, HLCS, GAB1, DNM1L, MYO5A, KCNH5, ZNF708, SMAD2, SUPT3H
20518810	MIMAT0018952	hsa-miR-4436a	1.1	1.21	0.76	0.3	0.32	0.12	1.27	0.233546	1.37	0.159828	20	ARL15, C1QTNF9, CDH10, TBC1D2B, NR6A1, TBCK, KCNH5, HLCS, ZNF708, ZBTB40, TECPR2, MAP4, KCNS2, SMAD2, MYO5A, DGKH, SUPT3H, MED6, GRAMD1B, GPR125
20518816	MIMAT0018959	hsa-miR-4441	0.83	0.49	0.92	0.1	0.2	0.33	-1.07	0.467837	-1.36	0.054062	15	ARL15, MAP4, ZFP69B, GABRA3, KCNS2, SSTR3, NR6A1, PPP2R3A, TBC1D2B, ZBTB40, TMEM194A, DGKH, GRAMD1B, TECPR2, GAB1
20518818	MIMAT0018961	hsa-miR-4443	8.28	7.79	8.22	0.42	0.14	0.37	1.05	0.93409	-1.35	0.459191	24	NR6A1, EDDM3B, TBCEL, C1QTNF9, TECPR2, PPP2R3A, KCNS2, PMM2, COL28A1, HLCS, MAP4, GABRA3, TBC1D2B, SYT1, TBCK, ZNF708, GAB1, SUPT3H, DNM1L, DGKH, GRAMD1B, MED6, SMAD2, EFHC2
20536716	MI0016805	hsa-mir-4459	0.92	1.36	1.44	0.11	0.04	0.46	-1.43	0.305515	-1.05	0.608334	21	C5AR2, CDKAL1, SLC39A11, MAP4, NR6A1, ZFP69B, OVOL1, ROBO1, OSR1, TBCK, PMM2, HS6ST2, TECPR2, ZNF708, GRAMD1B, ZBTB40, SSTR3, MYO5A, MED6, SMAD2, NETO1
20518841	MIMAT0018983	hsa-miR-4461	2.01	2.54	2.43	0.9	0.63	0.4	-1.33	0.892546	1.08	0.776613	16	PAGE3, PUS10, HS6ST2, TBCK, ZHX2, MEI4, MSR1, DGKH, SUPT3H, KCNH5, MYO5A, GRAMD1B, TBCEL, SMAD2, MED6, ROBO1
20518854	MIMAT0018996	hsa-miR-4469	0.83	1.14	0.48	0.21	0.15	0.2	1.27	0.383711	1.57	0.027065	28	SLC39A11, GPR89A, TBCEL, GRAMD1B, MAP4, STAG1, USP32, TBCK, SYT1, C5AR2, NR6A1, HLCS, OSR1, SSTR3, TECPR2, ZHX2, OVOL1, COL28A1, KCNS2, KCNH5, SUPT3H, DGKH, ZBTB40, ZNF708, ACSL3, SMAD2, DNM1L, GPR125
20518862	MIMAT0019003	hsa-miR-4476	1.51	1.32	0.95	0.59	0.34	0.32	1.47	0.39453	1.29	0.004131	26	OVOL1, SLC39A11, ARL15, C5AR2, INCA1, MAN2A1, NR6A1, PPP2R3A, OR2D2, ZBTB40, TMEM194A, KIR3DL2, TBC1D2B, ROBO1, GRAMD1B, ZHX2, DGKH, SSTR3, GAB1, DNM1L, ZNF708, SMAD2, MYO5A, MED6, SUPT3H, GPR125
20536737	MI0016829	hsa-mir-4477a	1.12	0.88	1.31	0.23	0.23	0.32	-1.14	0.914826	-1.35	0.290854	26	DGKH, GPR125, MSR1, SMAD2, MEI4, CDKAL1, SSTR3, TMEM194A, STAG1, GAB1, MYO5A, GABRA3, PPP2R3A, MAN2A1, ZFP69B, TBCEL, SYT1, KCNH5, TBCK, SUPT3H, ZNF708, ZBTB40, ACSL3, TUSC3, NETO1, HLCS
20536738	MI0016829	hsa-mir-4477a	1.11	0.8	1.18	0.23	0.17	0.31	-1.05	0.92061	-1.3	0.246817	26	DGKH, GPR125, MSR1, SMAD2, MEI4, CDKAL1, SSTR3, TMEM194A, STAG1, GAB1, MYO5A, GABRA3, PPP2R3A, MAN2A1, ZFP69B, TBCEL, SYT1, KCNH5, TBCK, SUPT3H, ZNF708, ZBTB40, ACSL3, TUSC3, NETO1, HLCS
20518880	MIMAT0019020	hsa-miR-4486	2.85	3.92	4.33	0.15	0.83	1	-2.81	0.263046	-1.33	0.766843	16	CDKAL1, PMM2, GABRA3, ZFP69B, SLC39A11, C5AR2, TECPR2, HLCS, ZBTB40, ZNF708, MAP4, TMEM194A, TBC1D2B, GRAMD1B, NR6A1, SMAD2
20536759	MI0016848	hsa-mir-4487	0.97	1.16	1.32	0.33	0.32	0.57	-1.28	0.771865	-1.12	0.55151	17	OSR1, EDDM3B, PMM2, SSTR3, COL28A1, MAN2A1, NR6A1, STAG1, TBCK, HLCS, ZFP69B, GRAMD1B, ZBTB40, MYO5A, SUPT3H, KCNH5, TECPR2
20536760	MI0016848	hsa-mir-4487	1.56	1.5	0.97	0.35	0.19	0.14	1.5	0.244335	1.44	0.071516	17	OSR1, EDDM3B, PMM2, SSTR3, COL28A1, MAN2A1, NR6A1, STAG1, TBCK, HLCS, ZFP69B, GRAMD1B, ZBTB40, MYO5A, SUPT3H, KCNH5, TECPR2
20518881	MIMAT0019021	hsa-miR-4487	4.69	4.75	4.21	0.94	1.02	0.43	1.39	0.550272	1.45	0.801682	17	OSR1, EDDM3B, PMM2, SSTR3, COL28A1, MAN2A1, NR6A1, STAG1, TBCK, HLCS, ZFP69B, GRAMD1B, ZBTB40, MYO5A, SUPT3H, KCNH5, TECPR2
20536767	MI0016855	hsa-mir-4493	1.4	1.09	0.92	0.15	0.18	0.22	1.39	0.050889	1.13	0.300724	16	NR6A1, SSTR3, ZFP69B, PMM2, QPCT, PPP2R3A, GRAMD1B, OVOL1, GABRA3, KCNH5, TMEM194A, DGKH, TUSC3, MYO5A, MED6, ZNF708
20518893	MIMAT0019033	hsa-miR-4498	1.42	2.46	3.07	0.72	0.64	1.1	-3.14	0.254037	-1.53	0.796384	22	PMM2, OVOL1, NR6A1, GABRA3, SLC39A11, CDKAL1, ZFP69B, TBC1D2B, GRAMD1B, TMEM194A, TBCK, KCNS2, GAB1, SSTR3, ZHX2, MYO5A, ZNF708, KCNH5, ZBTB40, SUPT3H, STAG1, TECPR2
20518895	MIMAT0019035	hsa-miR-4499	2.11	2.65	1.48	0.3	1	0.23	1.54	0.141548	2.25	0.490143	19	ARL15, MEI4, GAB1, ZFP69B, KIR3DL2, SYT1, TBCK, STAG1, TMEM194A, GRAMD1B, KCNH5, ZBTB40, DNM1L, MAN2A1, SMAD2, ZNF708, USP32, MED6, GPR125
20504415	MIMAT0009203	hsa-miR-449b-3p	2.3	2.71	1.8	0.3	0.61	0.2	1.42	0.198489	1.89	0.249356	18	L3HYPDH, TBC1D2B, MED6, KCNS2, MAN2A1, GRAMD1B, DGKH, MYO5A, ZBTB40, ZNF708, KCNH5, TBCEL, MAP4, HLCS, TMEM194A, SMAD2, TUSC3, NETO1
20536789	MI0016877	hsa-mir-4511	0.91	1.12	0.7	0.11	0.16	0.17	1.15	0.176736	1.33	0.049997	19	HS6ST2, TBCEL, NR6A1, GAB1, DGKH, KCNS2, MYO5A, TBCK, ZHX2, GRAMD1B, KCNH5, SMAD2, GABRA3, ROBO1, PMM2, DNM1L, MED6, TUSC3, ACSL3
20518908	MIMAT0019048	hsa-miR-4511	0.97	0.65	1.05	0.16	0.3	0.06	-1.06	0.894383	-1.31	0.254913	19	HS6ST2, TBCEL, NR6A1, GAB1, DGKH, KCNS2, MYO5A, TBCK, ZHX2, GRAMD1B, KCNH5, SMAD2, GABRA3, ROBO1, PMM2, DNM1L, MED6, TUSC3, ACSL3
20536794	MI0016882	hsa-mir-4516	1.48	0.86	1.1	0.2	0.38	0.3	1.3	0.352728	-1.18	0.748238	24	SLC39A11, HS6ST2, HLCS, NR6A1, KCNS2, PPP2R3A, CDKAL1, ZFP69B, ARL15, MAN2A1, TMEM194A, GRAMD1B, OVOL1, KCNH5, DGKH, MYO5A, MAP4, DNM1L, TECPR2, SUPT3H, SMAD2, GAB1, QPCT, NETO1
20536959	MI0017360	hsa-mir-451b	0.88	1.23	1.32	0.09	0.22	0.09	-1.35	0.002576	-1.06	0.804536	27	DNM1L, KIR3DL2, SIRT4, C5AR2, ZHX2, MEI4, SSTR3, USP32, MYO5A, MED6, ARL15, ROBO1, GRAMD1B, PPP2R3A, KCNS2, SUPT3H, TBCK, MAP4, DGKH, TBCEL, ZBTB40, TMEM194A, GAB1, SMAD2, ZNF708, QPCT, NETO1
20536802	MI0016889	hsa-mir-4522	0.8	1.03	1.48	0.51	0.15	0.37	-1.6	0.515639	-1.36	0.212593	15	L3HYPDH, OVOL1, ASNS, SSTR3, INCA1, MYO5A, KCNH5, TBCEL, KCNS2, ZNF708, DGKH, DNM1L, ZBTB40, GRAMD1B, QPCT
20536810	MI0016897	hsa-mir-4530	2.02	1.76	1.57	0.25	0.46	0.78	1.37	0.780844	1.14	0.431882	17	ZBTB40, SSTR3, GABRA3, PMM2, ROBO1, GAB1, KCNH5, ZFP69B, GRAMD1B, TBC1D2B, TECPR2, MAP4, TMEM194A, MYO5A, SMAD2, DGKH, GPR125
20536811	MI0016898	hsa-mir-4531	1.21	0.94	0.8	0.26	0.15	0.18	1.34	0.391755	1.1	0.347098	24	ZFP69B, CDKAL1, NR6A1, PPP2R3A, HLCS, INCA1, OSR1, TMEM194A, SLC39A11, MSR1, HS6ST2, KIR3DL2, ARL15, OVOL1, KCNS2, DGKH, MEI4, MYO5A, TECPR2, SUPT3H, DNM1L, SMAD2, QPCT, NETO1
20518934	MIMAT0019072	hsa-miR-4533	1.52	1.67	1.08	0.15	0.42	0.81	1.35	0.817326	1.51	0.808269	31	SLC39A11, C5AR2, GABRA3, TBC1D2B, PPP2R3A, COL28A1, GPR89A, NR6A1, ZFP69B, PMM2, ZBTB40, OSR1, OVOL1, TBCEL, GAB1, MAN2A1, DGKH, SSTR3, TECPR2, SMAD2, GRAMD1B, TBCK, DNM1L, ZNF708, KCNH5, HLCS, MED6, USP32, QPCT, GPR125, NETO1
20536814	MI0016901	hsa-mir-4534	1.04	1.44	1	0.33	0.48	0.14	1.03	0.806194	1.35	0.285259	20	EDDM3B, TUBA1B, ZFP69B, KCNS2, C5AR2, SSTR3, SLC39A11, NR6A1, KCNH5, DGKH, C1QTNF9, PPP2R3A, ZNF708, ZBTB40, TBC1D2B, GRAMD1B, SUPT3H, TUSC3, MED6, ROBO1
20536822	MI0016909	hsa-mir-4538	1.23	1.43	1	0.09	0.23	0.55	1.17	0.681043	1.35	0.958367	15	EDDM3B, ROBO1, MEI4, GABRA3, STAG1, USP32, SLC39A11, KCNS2, TBC1D2B, DGKH, ZNF708, TECPR2, GRAMD1B, QPCT, NETO1
20519410	MIMAT0019692	hsa-miR-4635	0.79	1.12	0.73	0.17	0.12	0.08	1.04	0.738654	1.3	0.012303	19	ARL15, KCNS2, SMAD2, MED6, MEI4, C5AR2, KCNH5, DGKH, PUS10, USP32, TBC1D2B, TMEM194A, HS6ST2, GAB1, MAN2A1, ZNF708, SUPT3H, ZBTB40, ACSL3
20519414	MIMAT0019696	hsa-miR-4638-3p	1.22	1.44	0.88	0.38	0.5	0.12	1.26	0.117714	1.47	0.161864	16	TBCK, GABRA3, MSR1, HLCS, NR6A1, TBC1D2B, PMM2, USP32, TECPR2, TBCEL, KCNH5, GRAMD1B, MYO5A, ZBTB40, ZNF708, SMAD2
20519415	MIMAT0019697	hsa-miR-4639-5p	0.89	1.1	0.72	0.13	0.34	0.13	1.13	0.012731	1.3	0.290002	20	ZFP69B, MEI4, KCNS2, OSR1, PPP2R3A, TBCEL, CDKAL1, OVOL1, MYO5A, DGKH, ZBTB40, STAG1, TMEM194A, MSR1, NR6A1, KCNH5, SMAD2, ACSL3, L3HYPDH, ZNF708
20519425	MIMAT0019707	hsa-miR-4646-5p	3.2	4.52	3.66	0.38	1.75	0.31	-1.38	0.291831	1.81	0.866693	26	GRAMD1B, ZFP69B, STAG1, DGKH, TUBA1B, C5AR2, OSR1, GABRA3, SSTR3, TBCEL, MED6, GAB1, HLCS, TECPR2, TBCK, DNM1L, ZHX2, ZBTB40, TBC1D2B, USP32, SYT1, NR6A1, KCNH5, MYO5A, SMAD2, SUPT3H
20536867	MI0017274	hsa-mir-4647	2.33	2.38	1.91	0.43	0.44	0.29	1.34	0.708429	1.38	0.037311	22	TMEM194A, CDH10, MAN2A1, SYT1, KIR3DL2, HLCS, KCNS2, GABRA3, ZNF708, C5AR2, KCNH5, GRAMD1B, CDKAL1, USP32, MEI4, SUPT3H, DGKH, SMAD2, ZBTB40, DNM1L, EFHC2, NETO1
20519427	MIMAT0019709	hsa-miR-4647	1.45	1.45	1.05	0.27	0.2	0.33	1.32	0.510263	1.33	0.347661	22	TMEM194A, CDH10, MAN2A1, SYT1, KIR3DL2, HLCS, KCNS2, GABRA3, ZNF708, C5AR2, KCNH5, GRAMD1B, CDKAL1, USP32, MEI4, SUPT3H, DGKH, SMAD2, ZBTB40, DNM1L, EFHC2, NETO1
20519428	MIMAT0019710	hsa-miR-4648	3.06	3.45	2.58	0.79	1.35	0.85	1.39	0.635828	1.82	0.09654	18	ZHX2, MAP4, GRAMD1B, TBC1D2B, GPR89A, TMEM194A, TBCEL, SYT1, DGKH, ZFP69B, KCNS2, GAB1, ZBTB40, PMM2, NR6A1, HLCS, SUPT3H, ZNF708
20519442	MIMAT0019724	hsa-miR-4657	1.46	1.13	1.07	0.45	0.27	0.08	1.31	0.226495	1.04	0.20324	19	COL28A1, TBCK, OVOL1, SYT1, TBC1D2B, DGKH, NR6A1, MAN2A1, HLCS, MEI4, TECPR2, MYO5A, GABRA3, SMAD2, C5AR2, ZBTB40, GAB1, KCNH5, NETO1
20519444	MIMAT0019726	hsa-miR-4659a-5p	0.81	0.68	1.1	0.01	0.09	0.14	-1.23	0.145411	-1.34	0.136341	17	TMEM194A, TUSC3, C5AR2, ARL15, HLCS, TBCEL, PUS10, KCNH5, ZNF708, MEI4, TECPR2, TBC1D2B, OVOL1, MED6, SSTR3, SMAD2, ZBTB40
20515539	MIMAT0015002	hsa-miR-466	1.19	1.86	1.07	0.18	0.63	0.24	1.09	0.810945	1.73	0.442866	25	PUS10, HS6ST2, SYT1, OVOL1, TUBA1B, SMAD2, C1QTNF9, TBCEL, PPP2R3A, ACSL3, DNM1L, ARL15, DGKH, TUSC3, KCNH5, GAB1, NR6A1, MAP4, MAN2A1, MYO5A, COL28A1, ZNF708, GRAMD1B, ROBO1, NETO1
20536882	MI0017288	hsa-mir-4660	0.94	1.27	0.82	0.22	0.2	0.36	1.09	0.991341	1.37	0.554255	19	SLC39A11, C1QTNF9, KCNS2, SSTR3, TBC1D2B, TBCK, ARL15, PMM2, NR6A1, ACSL3, STAG1, TMEM194A, HLCS, TECPR2, MYO5A, DNM1L, SMAD2, L3HYPDH, ZBTB40
20519446	MIMAT0019728	hsa-miR-4660	1.17	1.1	0.76	0.22	0.11	0.38	1.33	0.150035	1.26	0.21143	19	SLC39A11, C1QTNF9, KCNS2, SSTR3, TBC1D2B, TBCK, ARL15, PMM2, NR6A1, ACSL3, STAG1, TMEM194A, HLCS, TECPR2, MYO5A, DNM1L, SMAD2, L3HYPDH, ZBTB40
20519461	MIMAT0019743	hsa-miR-4667-5p	4.18	3.11	4.43	0.55	1.75	1.1	-1.18	0.838005	-2.49	0.0991	17	NR6A1, OVOL1, MAP4, GRAMD1B, TBC1D2B, SSTR3, ZBTB40, DGKH, ZHX2, TBCK, MSR1, KCNS2, DNM1L, SUPT3H, TECPR2, TBCEL, MED6
20519463	MIMAT0019745	hsa-miR-4668-5p	3.83	4.56	4.02	0.45	0.2	0.53	-1.14	0.458755	1.45	0.711922	26	DGKH, ZFP69B, TMEM194A, INCA1, PPP2R3A, TBC1D2B, KCNS2, GAB1, ACSL3, TBCEL, SMAD2, SYT1, ARL15, PMM2, SLC39A11, DNM1L, GRAMD1B, MYO5A, KCNH5, NR6A1, MED6, EFHC2, ROBO1, NETO1, CDKAL1, QPCT
20536899	MI0017304	hsa-mir-4673	1.46	1.84	2.09	0.48	0.92	0.34	-1.55	0.547821	-1.19	0.885749	17	EDDM3B, NR6A1, TBC1D2B, MED6, PMM2, SSTR3, CDKAL1, TECPR2, OVOL1, ZHX2, MYO5A, ZNF708, ZBTB40, MAP4, GRAMD1B, SMAD2, QPCT
20536912	MI0017314	hsa-mir-4682	1.03	1.6	1.02	0.2	0.43	0.17	1.01	0.298367	1.5	0.104189	18	DRD3, STAG1, ASNS, KCNS2, ARL15, HLCS, MEI4, DGKH, PMM2, TBC1D2B, MAN2A1, NR6A1, KCNH5, TMEM194A, TBCK, SMAD2, MYO5A, TECPR2
20536913	MI0017315	hsa-mir-4683	1.3	1.81	1.94	0.29	0.5	0.18	-1.56	0.150115	-1.1	0.765909	15	MAP4, GRAMD1B, C5AR2, CDKAL1, ZFP69B, MSR1, SLC39A11, NR6A1, SUPT3H, DGKH, TBCEL, ZNF708, ZBTB40, SMAD2, GAB1
20519486	MIMAT0019768	hsa-miR-4683	1.77	1.27	2.09	0.58	0.47	0.88	-1.25	0.704434	-1.77	0.641925	15	MAP4, GRAMD1B, C5AR2, CDKAL1, ZFP69B, MSR1, SLC39A11, NR6A1, SUPT3H, DGKH, TBCEL, ZNF708, ZBTB40, SMAD2, GAB1
20519488	MIMAT0019770	hsa-miR-4684-3p	2.64	1.83	2.44	0.03	1.53	0.77	1.14	0.725048	-1.53	0.694967	16	L3HYPDH, MAN2A1, SUPT3H, GAB1, NR6A1, SYT1, PPP2R3A, SLC39A11, STAG1, TECPR2, KCNH5, ZNF708, ACSL3, USP32, SMAD2, GRAMD1B
20519498	MIMAT0019779	hsa-miR-4690-5p	3.24	3.4	3.64	1.22	0.6	0.47	-1.32	0.368415	-1.19	0.101445	18	SYT1, KIR3DL2, PPP2R3A, TMEM194A, NR6A1, PMM2, ZBTB40, TBC1D2B, SUPT3H, KCNS2, TBCEL, DGKH, MAP4, MYO5A, HLCS, MED6, SMAD2, NETO1
20519511	MIMAT0019792	hsa-miR-4697-3p	1.99	2.12	1.67	0.44	0.32	0.17	1.25	0.346308	1.36	0.031718	20	OR2D2, SIRT4, TUBA1B, ACSL3, KCNH5, SYT1, TBC1D2B, MAP4, DGKH, MSR1, USP32, TBCK, ZBTB40, DNM1L, MEI4, GRAMD1B, SMAD2, TBCEL, MED6, NETO1
20519513	MIMAT0019794	hsa-miR-4699-5p	1.06	1.48	1	0.08	0.49	0.35	1.04	0.979774	1.39	0.65375	27	CDKAL1, ZFP69B, ARL15, EDDM3B, ZBTB40, TBCEL, TBCK, GABRA3, DGKH, TMEM194A, STAG1, SSTR3, MYO5A, PPP2R3A, KCNH5, MAN2A1, KCNS2, SUPT3H, GAB1, ZNF708, MSR1, SMAD2, L3HYPDH, USP32, TECPR2, EFHC2, NETO1
20519517	MIMAT0019798	hsa-miR-4701-5p	1.74	1.3	1.96	0.35	0.3	0.49	-1.17	0.899449	-1.59	0.289517	20	ARL15, ROBO1, OSR1, ZFP69B, PMM2, PUS10, GABRA3, ZBTB40, SLC39A11, MAN2A1, TECPR2, NR6A1, MAP4, KCNH5, DGKH, TBCK, MYO5A, ACSL3, ZNF708, GPR125
20519535	MIMAT0019817	hsa-miR-4711-3p	0.93	0.73	1.42	0.16	0.12	0.13	-1.41	0.0149	-1.62	0.005695	17	SLC39A11, TBCK, GABRA3, PUS10, STAG1, C5AR2, ARL15, DGKH, NR6A1, ZNF708, ACSL3, KCNH5, GAB1, MYO5A, TBCEL, USP32, NETO1
20519538	MIMAT0019820	hsa-miR-4713-5p	1.35	0.61	1.26	0.12	0.58	0.17	1.07	0.571893	-1.56	0.412636	23	KCNS2, SSTR3, ZHX2, COL28A1, SYT1, GRAMD1B, GPR89A, ZFP69B, TBCEL, GABRA3, HLCS, TBCK, TECPR2, MEI4, MAP4, KCNH5, USP32, MYO5A, MAN2A1, ZBTB40, ZNF708, SUPT3H, NETO1
20519542	MIMAT0019824	hsa-miR-4715-5p	1.44	1.12	1.06	0.25	0.13	0.13	1.3	0.028387	1.04	0.66569	16	SLC39A11, SYT1, TBC1D2B, HS6ST2, ROBO1, MSR1, COL28A1, GABRA3, MYO5A, MEI4, NR6A1, CDKAL1, ZNF708, DGKH, SMAD2, L3HYPDH
20519549	MIMAT0019830	hsa-miR-4717-3p	1.64	1.46	1.89	0.09	0.58	0.29	-1.2	0.275521	-1.35	0.57137	17	TUBA1B, ROBO1, CDH10, MAP4, GRAMD1B, GABRA3, DGKH, ZFP69B, TBCEL, KCNS2, KCNH5, SSTR3, ZNF708, ZBTB40, TECPR2, GAB1, SMAD2
20519556	MIMAT0019837	hsa-miR-4722-3p	1.83	2.18	2.47	0.39	0.52	0.3	-1.56	0.24837	-1.23	0.496657	19	PUS10, C5AR2, GRAMD1B, NR6A1, OVOL1, TMEM194A, KCNH5, ZHX2, TBCK, DGKH, ZBTB40, TECPR2, PPP2R3A, ZNF708, DNM1L, MYO5A, SUPT3H, TBC1D2B, USP32
20519559	MIMAT0019838	hsa-miR-4723-5p	1.19	1.36	1.6	0.11	0.12	0.64	-1.32	0.276246	-1.17	0.400489	17	ZFP69B, MAP4, TMEM194A, CDKAL1, GRAMD1B, NR6A1, SLC39A11, GABRA3, OVOL1, DGKH, SSTR3, SMAD2, MYO5A, HLCS, ZNF708, TBCK, PPP2R3A
20519565	MIMAT0019844	hsa-miR-4725-3p	1.36	0.61	0.87	0.33	0.41	0.29	1.41	0.148893	-1.2	0.591825	22	PMM2, ZFP69B, GRAMD1B, ARL15, NR6A1, CDKAL1, GPR89A, ZBTB40, ZHX2, GABRA3, SSTR3, TBC1D2B, DGKH, TBCK, SYT1, MYO5A, ACSL3, GAB1, DNM1L, TBCEL, MED6, ZNF708
20519567	MIMAT0019846	hsa-miR-4726-3p	0.93	1.58	0.99	0.09	0.39	0.23	-1.04	0.230749	1.5	0.140236	20	SSTR3, TBCEL, OVOL1, ZFP69B, MAP4, NR6A1, HLCS, MYO5A, ZNF708, TBCK, USP32, ZBTB40, KCNS2, DGKH, ZHX2, TECPR2, L3HYPDH, SMAD2, DNM1L, ROBO1
20519588	MIMAT0019867	hsa-miR-4738-3p	2.39	1.48	1.58	0.16	0.16	0.45	1.75	0.07186	-1.07	0.665618	24	NETO1, ZFP69B, DGKH, ARL15, PAGE3, TUSC3, DNM1L, KCNS2, ZBTB40, GAB1, TMEM194A, COL28A1, MYO5A, HLCS, MEI4, GRAMD1B, TBC1D2B, KCNH5, ZNF708, CDKAL1, USP32, TBCK, SMAD2, ROBO1
20519589	MIMAT0019868	hsa-miR-4739	8.89	9.27	9.31	0.32	0.08	0.04	-1.34	0.257909	-1.03	0.278786	17	COL28A1, NR6A1, CDKAL1, TBCEL, MAP4, GABRA3, HLCS, PMM2, PPP2R3A, MYO5A, TMEM194A, DGKH, GRAMD1B, TBC1D2B, ZBTB40, SUPT3H, SMAD2
20519592	MIMAT0019871	hsa-miR-4741	4.15	3.71	4.11	1.26	1	0.87	1.03	0.695133	-1.32	0.655213	22	OVOL1, TMEM194A, PMM2, COL28A1, GRAMD1B, INCA1, NR6A1, CDKAL1, SSTR3, GABRA3, SLC39A11, ZFP69B, KCNS2, KCNH5, HLCS, TBC1D2B, ZNF708, TECPR2, MYO5A, TBCK, GAB1, SMAD2
20519594	MIMAT0019873	hsa-miR-4742-3p	1.27	0.76	1.38	0.26	0.29	0.28	-1.08	0.76912	-1.54	0.23136	19	CDH10, SLC39A11, COL28A1, GRAMD1B, NETO1, DGKH, STAG1, PMM2, TBCK, KCNH5, DNM1L, MAN2A1, TBCEL, TECPR2, L3HYPDH, SMAD2, TBC1D2B, ACSL3, QPCT
20519593	MIMAT0019872	hsa-miR-4742-5p	1.62	1.02	0.94	0.29	0.27	0.39	1.6	0.317655	1.06	0.706543	20	SYT1, EDDM3B, MAN2A1, MAP4, DGKH, ZFP69B, TBCEL, ZBTB40, HLCS, GAB1, MYO5A, GRAMD1B, DNM1L, CDKAL1, SMAD2, ZNF708, TECPR2, ACSL3, MED6, QPCT
20519604	MIMAT0019882	hsa-miR-4747-5p	1.08	0.97	1.52	0.17	0.28	0.13	-1.35	0.086441	-1.46	0.176665	23	EDDM3B, MAN2A1, KIR3DL2, TMEM194A, GPR89A, MAP4, ZBTB40, GRAMD1B, NR6A1, SLC39A11, SSTR3, DGKH, TBCK, MYO5A, STAG1, GAB1, TECPR2, SUPT3H, ZNF708, SMAD2, ZFP69B, NETO1, KCNS2
20519614	MIMAT0019891	hsa-miR-4753-3p	0.64	0.88	1.35	0.16	0.14	0.65	-1.64	0.29828	-1.39	0.528111	27	GRAMD1B, MED6, ZFP69B, SMAD2, MEI4, MYO5A, SYT1, MAN2A1, GABRA3, DGKH, MSR1, USP32, KCNS2, ZNF708, HLCS, TMEM194A, TBCK, OVOL1, CDH10, SSTR3, PMM2, KCNH5, DNM1L, ZBTB40, TBCEL, ACSL3, NETO1
20519622	MIMAT0019899	hsa-miR-4756-5p	1.58	1.07	0.92	0.43	0.11	0.42	1.58	0.486318	1.11	0.68214	17	COL28A1, NR6A1, CDKAL1, TBCEL, MAP4, GABRA3, HLCS, PMM2, PPP2R3A, MYO5A, TMEM194A, DGKH, GRAMD1B, TBC1D2B, ZBTB40, SUPT3H, SMAD2
20519644	MIMAT0019921	hsa-miR-4768-3p	0.5	0.92	1.1	0.26	0.25	0.26	-1.51	0.412275	-1.14	0.846127	18	C5AR2, CDKAL1, NR6A1, ZFP69B, TBC1D2B, SLC39A11, ZNF708, MAP4, MYO5A, DGKH, MEI4, GRAMD1B, ZBTB40, SMAD2, MED6, GPR125, NETO1, TMEM194A
20519645	MIMAT0019922	hsa-miR-4769-5p	1.79	0.93	1.01	0.53	0.07	0.21	1.71	0.198744	-1.06	0.685743	18	GPR89A, SYT1, ZBTB40, NR6A1, ZHX2, DGKH, ZFP69B, TMEM194A, MAP4, OVOL1, PMM2, KCNS2, USP32, TBCEL, ZNF708, SUPT3H, HLCS, EFHC2
20519650	MIMAT0019927	hsa-miR-4772-3p	1.02	0.95	0.56	0.2	0.08	0.52	1.38	0.350133	1.31	0.709785	19	ZFP69B, TBCEL, ZHX2, SMAD2, PUS10, DNM1L, DGKH, ZBTB40, HLCS, ZNF708, TBC1D2B, PPP2R3A, GAB1, TBCK, GRAMD1B, KCNS2, SSTR3, TMEM194A, TUSC3
20519656	MIMAT0019933	hsa-miR-4776-3p	1.24	1.09	1.46	0.34	0.27	0.58	-1.17	0.291836	-1.3	0.329286	19	ZNF708, TBCEL, ARL15, C5AR2, USP32, OVOL1, KCNH5, MSR1, ZFP69B, TMEM194A, DGKH, MAP4, TECPR2, GRAMD1B, PMM2, SSTR3, ZBTB40, SMAD2, MED6
20519659	MIMAT0019936	hsa-miR-4778-5p	1.85	1.16	1.47	0.99	0.08	0.2	1.3	0.482023	-1.24	0.186934	23	QPCT, GRAMD1B, ARL15, NR6A1, ZFP69B, KCNH5, PMM2, MSR1, SYT1, DGKH, HLCS, STAG1, OVOL1, PPP2R3A, KCNS2, TBCEL, TBCK, SMAD2, MYO5A, ZBTB40, ZNF708, ROBO1, NETO1
20519661	MIMAT0019938	hsa-miR-4779	1.14	0.75	1.2	0.38	0.14	0.09	-1.05	0.836186	-1.37	0.055354	18	TBCEL, MAP4, HLCS, OVOL1, GRAMD1B, GABRA3, TBCK, PPP2R3A, CDKAL1, KCNH5, SLC39A11, ZBTB40, SUPT3H, SSTR3, NR6A1, MYO5A, TECPR2, MED6
20537033	MI0017424	hsa-mir-4780	1.6	1.84	1.1	0.3	0.45	0.44	1.41	0.582524	1.68	0.324039	15	HLCS, GRAMD1B, STAG1, SSTR3, HS6ST2, ZHX2, MAP4, ZFP69B, DGKH, TECPR2, GAB1, TBCEL, NR6A1, PPP2R3A, GPR125
20519666	MIMAT0019943	hsa-miR-4781-3p	0.78	1.16	1.38	0.03	0.26	0.32	-1.52	0.123146	-1.16	0.877814	19	ZFP69B, OSR1, COL28A1, MAN2A1, GRAMD1B, ZNF708, GAB1, TMEM194A, DGKH, SUPT3H, TBCK, MYO5A, TUSC3, PPP2R3A, DNM1L, KCNH5, SMAD2, EFHC2, NETO1
20519671	MIMAT0019948	hsa-miR-4784	1.06	1.46	1.58	0.04	0.18	0.26	-1.43	0.140706	-1.09	0.929223	22	NR6A1, TBCK, KIR3DL2, SSTR3, SLC39A11, MED6, ARL15, GPR89A, TMEM194A, PPP2R3A, GABRA3, OSR1, KCNH5, MAP4, MYO5A, TECPR2, GRAMD1B, GAB1, DGKH, ZBTB40, QPCT, NETO1
20519677	MIMAT0019954	hsa-miR-4786-5p	1.04	1.34	1.55	0.17	0.15	0.35	-1.43	0.161907	-1.16	0.299098	19	ZFP69B, SMAD2, GRAMD1B, CDKAL1, TBCEL, TMEM194A, PMM2, ZHX2, KCNH5, ZBTB40, TECPR2, NR6A1, MEI4, OVOL1, DGKH, ACSL3, ZNF708, GPR125, QPCT
20519685	MIMAT0019962	hsa-miR-4790-3p	1.07	1.34	0.88	0.14	0.33	0.44	1.14	0.872646	1.38	0.249982	15	NETO1, PPP2R3A, HS6ST2, SIRT4, ZFP69B, ZNF708, TBCK, NR6A1, GRAMD1B, GAB1, SYT1, DNM1L, MYO5A, TBCEL, GPR125
20519689	MIMAT0019966	hsa-miR-4793-3p	2.65	2.97	2.17	0.49	0.24	0.87	1.39	0.744797	1.74	0.363677	21	MSR1, HLCS, KCNH5, TMEM194A, KCNS2, TBCEL, MAP4, ZFP69B, PMM2, DGKH, MYO5A, C5AR2, NR6A1, ZNF708, GRAMD1B, SSTR3, ZBTB40, SMAD2, QPCT, NETO1, SLC39A11
20519690	MIMAT0019967	hsa-miR-4794	0.8	1.01	1.34	0.17	0.1	0.36	-1.45	0.517742	-1.26	0.764061	24	ZFP69B, TBC1D2B, ARL15, MEI4, GRAMD1B, SYT1, GPR89A, PPP2R3A, NR6A1, PMM2, TMEM194A, HS6ST2, C5AR2, TBCEL, KCNH5, HLCS, CDKAL1, DGKH, ZNF708, TBCK, SMAD2, MYO5A, QPCT, NETO1
20519691	MIMAT0019968	hsa-miR-4795-5p	0.78	1	1.25	0.07	0.1	0.4	-1.39	0.365825	-1.19	0.708473	15	CDH10, SLC39A11, SMAD2, MEI4, MAN2A1, KCNH5, OSR1, GAB1, TBCEL, SYT1, TBC1D2B, TECPR2, GRAMD1B, MYO5A, NETO1
20519695	MIMAT0019972	hsa-miR-4797-5p	0.74	1.51	0.92	0.4	0.38	0.16	-1.13	0.925125	1.5	0.159786	16	ARL15, PUS10, TBCEL, DGKH, GABRA3, CDKAL1, MYO5A, SMAD2, GAB1, ZBTB40, ZFP69B, ZNF708, TECPR2, ROBO1, QPCT, NETO1
20503104	MIMAT0002176	hsa-miR-485-3p	1.82	1.49	1.39	0.61	0.51	0.74	1.35	0.548707	1.07	0.973722	16	MEI4, DNM1L, ZHX2, MAN2A1, KCNH5, DGKH, TBCEL, TBC1D2B, ZFP69B, ZBTB40, GRAMD1B, SMAD2, ZNF708, SUPT3H, MED6, ROBO1
20503106	MIMAT0004762	hsa-miR-486-3p	5.05	3.97	4.53	0.98	1.95	0.44	1.43	0.889895	-1.48	0.688355	18	MAP4, NR6A1, GPR89A, TBC1D2B, ZFP69B, OVOL1, GAB1, ZHX2, MSR1, OSR1, INCA1, TECPR2, SSTR3, DGKH, GRAMD1B, SMAD2, MYO5A, ZNF708
20504217	MIMAT0026614	hsa-miR-487b-5p	1.35	1.4	0.98	0.33	0.13	0.42	1.29	0.411159	1.34	0.297795	15	GPR89A, MSR1, TBCK, ZFP69B, GAB1, MYO5A, DGKH, TUSC3, MAP4, TBC1D2B, NR6A1, SMAD2, TBCEL, ROBO1, NETO1
20503815	MIMAT0002824	hsa-miR-498	1.87	2.27	2.38	0.48	0.12	0.71	-1.42	0.34103	-1.07	0.890642	20	MED6, PUS10, MYO5A, PPP2R3A, DGKH, ACSL3, TMEM194A, NR6A1, ZBTB40, ZNF708, KCNS2, HS6ST2, KCNH5, GAB1, SMAD2, GRAMD1B, TBCEL, TUSC3, SUPT3H, NETO1
20519621	MIMAT0019898	hsa-miR-499b-3p	1.53	1.76	1.26	0.16	0.19	0.12	1.21	0.233602	1.41	0.01249	24	MAN2A1, CDH10, GAB1, COL28A1, ARL15, KCNS2, KCNH5, TMEM194A, DGKH, C5AR2, SMAD2, NR6A1, MAP4, PPP2R3A, TBC1D2B, ZBTB40, ZFP69B, TECPR2, ACSL3, MED6, USP32, GRAMD1B, QPCT, ROBO1
20520196	MIMAT0021019	hsa-miR-5000-5p	1.28	1.09	0.85	0.22	0.38	0.03	1.35	0.060696	1.19	0.481117	19	INCA1, ZFP69B, GAB1, MAN2A1, KCNS2, L3HYPDH, DNM1L, HLCS, PPP2R3A, ZHX2, USP32, GRAMD1B, NR6A1, DGKH, TMEM194A, KCNH5, ZBTB40, TECPR2, SMAD2
20520202	MIMAT0021025	hsa-miR-5003-5p	0.72	0.82	1.16	0.12	0.18	0.32	-1.36	0.379336	-1.27	0.502342	20	QPCT, ZFP69B, SLC39A11, ARL15, MAP4, TMEM194A, MAN2A1, DGKH, TBC1D2B, KCNH5, ROBO1, MYO5A, TECPR2, GAB1, SMAD2, SUPT3H, ZNF708, TBCEL, MED6, EFHC2
20520220	MIMAT0021045	hsa-miR-5011-5p	1.3	0.97	0.65	0.27	0.23	0.3	1.58	0.244864	1.25	0.604183	26	MEI4, KCNH5, DGKH, GRAMD1B, SMAD2, CDH10, MED6, ARL15, NR6A1, ZFP69B, GAB1, TBCEL, TBCK, MYO5A, ZNF708, HLCS, KCNS2, C5AR2, DNM1L, USP32, SUPT3H, QPCT, ACSL3, ROBO1, GPR125, NETO1
20503879	MIMAT0002873	hsa-miR-502-5p	2.7	1.6	2.38	0.77	0.44	0.38	1.25	0.209383	-1.72	0.205248	20	KCNS2, NR6A1, HS6ST2, PPP2R3A, MAN2A1, C5AR2, SLC39A11, TBCEL, SYT1, SSTR3, TMEM194A, TBCK, OVOL1, DGKH, ZNF708, TBC1D2B, ZBTB40, SUPT3H, KCNH5, SMAD2
20503885	MIMAT0026612	hsa-miR-504-3p	3.75	3.12	3.02	0.53	0.71	0.5	1.65	0.6382	1.07	0.216543	17	MED6, PMM2, C5AR2, DGKH, NR6A1, GABRA3, TMEM194A, PPP2R3A, TECPR2, ZNF708, TBCK, MYO5A, DNM1L, SUPT3H, CDKAL1, MAP4, OVOL1
20520325	MIMAT0021080	hsa-miR-5088-5p	1.72	1.57	1.98	0.07	0.51	0.3	-1.2	0.284353	-1.33	0.07563	17	KCNS2, NR6A1, ZBTB40, PPP2R3A, TBCEL, SLC39A11, COL28A1, GRAMD1B, ZFP69B, SSTR3, TECPR2, DGKH, HLCS, ZNF708, MAP4, MYO5A, ARL15
20520332	MIMAT0021085	hsa-miR-5093	1.96	1.75	1.39	0.37	0.43	0.6	1.49	0.978535	1.29	0.569819	28	MEI4, DGKH, COL28A1, SYT1, ARL15, TBCEL, SLC39A11, TBCK, NR6A1, KCNS2, HS6ST2, GAB1, ROBO1, MYO5A, MAN2A1, ZFP69B, TBC1D2B, STAG1, KCNH5, TMEM194A, ZBTB40, ZNF708, SUPT3H, GRAMD1B, TECPR2, SMAD2, ACSL3, HLCS
20520333	MIMAT0021086	hsa-miR-5094	2.02	1.87	1.38	0.24	0.62	0.26	1.55	0.112456	1.4	0.39056	18	HS6ST2, ZFP69B, NETO1, PPP2R3A, HLCS, GABRA3, SLC39A11, ARL15, KCNS2, GAB1, MYO5A, DGKH, KCNH5, ACSL3, TBCEL, ZNF708, MED6, SMAD2
20537087	MI0018001	hsa-mir-5095	5.67	5.49	5.04	0.5	0.62	0.63	1.55	0.931567	1.36	0.785942	22	PUS10, MED6, TUBA1B, C5AR2, MSR1, HLCS, DGKH, USP32, GABRA3, PPP2R3A, ZNF708, TBC1D2B, TMEM194A, MEI4, DNM1L, MYO5A, ZBTB40, TBCK, KCNS2, TUSC3, SMAD2, ROBO1
20520348	MIMAT0020600	hsa-miR-5095	1.37	1.23	1.62	0.35	0.27	0.61	-1.19	0.926896	-1.31	0.378207	22	PUS10, MED6, TUBA1B, C5AR2, MSR1, HLCS, DGKH, USP32, GABRA3, PPP2R3A, ZNF708, TBC1D2B, TMEM194A, MEI4, DNM1L, MYO5A, ZBTB40, TBCK, KCNS2, TUSC3, SMAD2, ROBO1
20520352	MIMAT0020603	hsa-miR-5096	1.42	0.95	1.02	0.87	0.51	0.4	1.32	0.392419	-1.05	0.746659	26	C1QTNF9, GPR89A, MED6, C5AR2, TBCEL, DGKH, ASNS, NETO1, KCNH5, ZNF708, TMEM194A, NR6A1, SYT1, TBCK, TBC1D2B, SSTR3, PMM2, TECPR2, ROBO1, HS6ST2, MSR1, ZFP69B, KCNS2, MYO5A, ZBTB40, TUSC3
20503792	MIMAT0026606	hsa-miR-511-3p	1.65	0.91	1.01	0.27	0.1	0.16	1.56	0.094661	-1.07	0.217717	18	TBCEL, PUS10, MSR1, SLC39A11, ZNF708, DNM1L, PPP2R3A, KCNH5, MAN2A1, TBCK, DGKH, NR6A1, SMAD2, SUPT3H, ROBO1, MYO5A, GPR125, NETO1
20503889	MIMAT0004777	hsa-miR-513a-3p	1.14	0.89	0.71	0.21	0.06	0.29	1.35	0.38683	1.14	0.954942	35	ARL15, PUS10, MEI4, MSR1, DGKH, ZNF708, KCNH5, STAG1, MAP4, NR6A1, MAN2A1, GAB1, TBCK, SUPT3H, TBCEL, PMM2, ZHX2, HLCS, ZFP69B, KIR3DL2, TECPR2, TUSC3, SYT1, GPR89A, MYO5A, PPP2R3A, TMEM194A, SMAD2, USP32, ZBTB40, GRAMD1B, ROBO1, MED6, QPCT, NETO1
20520568	MIMAT0021120	hsa-miR-5189-5p	3.17	4.21	4.52	0.66	0.96	0.88	-2.54	0.303104	-1.24	0.096536	20	CDKAL1, GABRA3, ZFP69B, PMM2, GNMT, C5AR2, SLC39A11, KCNS2, OVOL1, MAP4, GRAMD1B, NR6A1, TECPR2, TBC1D2B, ZNF708, TMEM194A, ZHX2, ZBTB40, SUPT3H, SMAD2
20503842	MIMAT0002847	hsa-miR-518c-5p	1.71	1.49	1.27	0.3	0.35	0.02	1.36	0.127274	1.17	0.334306	18	TMEM194A, ZFP69B, PMM2, TBCEL, GABRA3, NR6A1, C5AR2, OVOL1, GAB1, MEI4, TECPR2, SSTR3, MAP4, DGKH, SLC39A11, SUPT3H, SMAD2, DNM1L
20503858	MIMAT0005450	hsa-miR-518e-5p	1.91	1.22	1.67	0.36	0.47	0.35	1.18	0.495984	-1.37	0.029454	20	ZFP69B, PPP2R3A, SYT1, QPCT, GNMT, SMAD2, SLC39A11, TBC1D2B, TECPR2, TMEM194A, DGKH, KCNH5, TBCK, MYO5A, DNM1L, GRAMD1B, TBCEL, ZBTB40, EFHC2, NETO1
20520570	MIMAT0021121	hsa-miR-5190	0.94	1.02	1.31	0.1	0.22	0.43	-1.3	0.842006	-1.22	0.803639	18	USP32, PPP2R3A, MAP4, TMEM194A, HS6ST2, ZFP69B, NR6A1, KCNH5, TBC1D2B, DGKH, ZNF708, KCNS2, MYO5A, CDKAL1, TBCEL, GAB1, ACSL3, SMAD2
20537134	MI0018171	hsa-mir-5192	1.08	0.73	1.15	0.27	0.13	0.28	-1.05	0.053504	-1.34	0.189083	16	GABRA3, KIR3DL2, INCA1, SMAD2, OSR1, SSTR3, TMEM194A, C5AR2, NR6A1, SYT1, HS6ST2, HLCS, GRAMD1B, KCNS2, KCNH5, MYO5A
20520577	MIMAT0021128	hsa-miR-5196-5p	4.49	3.4	4.15	0.23	0.96	0.79	1.26	0.445702	-1.68	0.246287	23	EDDM3B, MAN2A1, KIR3DL2, TMEM194A, GPR89A, MAP4, ZBTB40, GRAMD1B, NR6A1, SLC39A11, SSTR3, DGKH, TBCK, MYO5A, STAG1, GAB1, TECPR2, SUPT3H, ZNF708, SMAD2, ZFP69B, NETO1, KCNS2
20503868	MIMAT0005452	hsa-miR-519a-5p	1.91	1.22	1.67	0.36	0.47	0.35	1.18	0.495984	-1.37	0.029454	20	ZFP69B, PPP2R3A, SYT1, QPCT, GNMT, SMAD2, SLC39A11, TBC1D2B, TECPR2, TMEM194A, DGKH, KCNH5, TBCK, MYO5A, DNM1L, GRAMD1B, TBCEL, ZBTB40, EFHC2, NETO1
20503829	MIMAT0005454	hsa-miR-519b-5p	1.91	1.22	1.67	0.36	0.47	0.35	1.18	0.495984	-1.37	0.029454	20	ZFP69B, PPP2R3A, SYT1, QPCT, GNMT, SMAD2, SLC39A11, TBC1D2B, TECPR2, TMEM194A, DGKH, KCNH5, TBCK, MYO5A, DNM1L, GRAMD1B, TBCEL, ZBTB40, EFHC2, NETO1
20503823	MIMAT0002831	hsa-miR-519c-5p	1.91	1.22	1.67	0.36	0.47	0.35	1.18	0.495984	-1.37	0.029454	20	ZFP69B, PPP2R3A, SYT1, QPCT, GNMT, SMAD2, SLC39A11, TBC1D2B, TECPR2, TMEM194A, DGKH, KCNH5, TBCK, MYO5A, DNM1L, GRAMD1B, TBCEL, ZBTB40, EFHC2, NETO1
20503819	MIMAT0002828	hsa-miR-519e-5p	1.51	2.34	2.5	1.33	0.43	0.59	-1.98	0.718691	-1.11	0.786147	23	ZFP69B, ZNF708, SSTR3, TMEM194A, MEI4, KCNH5, DNM1L, SMAD2, USP32, MAP4, ZBTB40, PPP2R3A, GRAMD1B, GAB1, MYO5A, ZHX2, DGKH, SLC39A11, NR6A1, TUSC3, MED6, QPCT, NETO1
20503866	MIMAT0005451	hsa-miR-522-5p	1.91	1.22	1.67	0.36	0.47	0.35	1.18	0.495984	-1.37	0.029454	20	ZFP69B, PPP2R3A, SYT1, QPCT, GNMT, SMAD2, SLC39A11, TBC1D2B, TECPR2, TMEM194A, DGKH, KCNH5, TBCK, MYO5A, DNM1L, GRAMD1B, TBCEL, ZBTB40, EFHC2, NETO1
20503833	MIMAT0005449	hsa-miR-523-5p	1.91	1.22	1.67	0.36	0.47	0.35	1.18	0.495984	-1.37	0.029454	20	ZFP69B, PPP2R3A, SYT1, QPCT, GNMT, SMAD2, SLC39A11, TBC1D2B, TECPR2, TMEM194A, DGKH, KCNH5, TBCK, MYO5A, DNM1L, GRAMD1B, TBCEL, ZBTB40, EFHC2, NETO1
20503831	MIMAT0002838	hsa-miR-525-5p	1.38	1.43	2.42	0.31	0.52	0.65	-2.05	0.345724	-1.98	0.436591	17	HLCS, TMEM194A, OVOL1, STAG1, GNMT, MAP4, TBCEL, PPP2R3A, DGKH, ZBTB40, MAN2A1, MYO5A, NR6A1, ZNF708, SMAD2, QPCT, NETO1
20503827	MIMAT0002835	hsa-miR-526b-5p	1.2	0.94	1.47	0.53	0.59	0.33	-1.21	0.956881	-1.44	0.499732	19	PPP2R3A, HS6ST2, GPR89A, MSR1, PMM2, MAN2A1, TBCK, GAB1, ROBO1, TMEM194A, MEI4, TBCEL, ACSL3, ZNF708, TECPR2, ZBTB40, GRAMD1B, SUPT3H, NETO1
20535245	MI0003515	hsa-mir-544a	1.07	1.61	1.08	0.15	0.49	0.28	-1.01	0.946415	1.44	0.54246	24	GPR125, DNM1L, ROBO1, PPP2R3A, TBCEL, ZFP69B, TMEM194A, MYO5A, USP32, SSTR3, KCNH5, HLCS, MSR1, MAN2A1, DGKH, NR6A1, TBCK, ZNF708, MAP4, SMAD2, GRAMD1B, SUPT3H, ACSL3, TUSC3
20504191	MIMAT0004785	hsa-miR-545-5p	0.63	0.96	1	0.17	0.14	0.23	-1.3	0.30608	-1.03	0.621317	24	ZFP69B, ZNF708, GAB1, HLCS, MED6, SYT1, TBCEL, PPP2R3A, KCNS2, DGKH, ACSL3, MYO5A, TBCK, MEI4, HS6ST2, STAG1, KCNH5, ZBTB40, SUPT3H, TUSC3, GRAMD1B, SMAD2, ROBO1, NETO1
20504316	MIMAT0003251	hsa-miR-548a-3p	4.61	5.38	4.53	1.56	1.06	0.76	1.06	0.807561	1.8	0.220464	27	ARL15, CDH10, DGKH, KCNS2, TMEM194A, MAN2A1, GPR125, MAP4, HS6ST2, MYO5A, NR6A1, ROBO1, TBC1D2B, NETO1, TBCK, TECPR2, HLCS, GRAMD1B, SMAD2, SYT1, ZNF708, MED6, TBCEL, ZBTB40, SUPT3H, USP32, EFHC2
20518938	MIMAT0022740	hsa-miR-548am-5p	0.91	1.37	0.98	0.19	0.47	0.07	-1.05	0.444109	1.31	0.310165	32	EFHC2, C1QTNF9, L3HYPDH, ZFP69B, GAB1, SLC39A11, CDKAL1, MED6, ROBO1, OSR1, MEI4, TBCEL, ZNF708, DGKH, TUSC3, MSR1, HLCS, ACSL3, TBCK, HS6ST2, MYO5A, USP32, SMAD2, TBC1D2B, DNM1L, TECPR2, SYT1, MAN2A1, GRAMD1B, SUPT3H, GPR125, NETO1
20520213	MIMAT0021038	hsa-miR-548ap-3p	1.01	1.32	0.8	0.08	0.38	0.57	1.16	0.756859	1.43	0.6604	29	C1QTNF9, PUS10, ZFP69B, TBCEL, OVOL1, GAB1, MAN2A1, KCNH5, STAG1, MEI4, ROBO1, MAP4, TECPR2, TBC1D2B, ZHX2, DGKH, HS6ST2, KCNS2, HLCS, PPP2R3A, SMAD2, TBCK, GRAMD1B, USP32, MYO5A, SUPT3H, GPR125, QPCT, NETO1
20521802	MIMAT0022263	hsa-miR-548aq-5p	1.36	0.95	0.89	0.74	0.18	0.2	1.38	0.535497	1.04	0.552435	32	EFHC2, C1QTNF9, L3HYPDH, ZFP69B, GAB1, SLC39A11, CDKAL1, MED6, ROBO1, OSR1, MEI4, TBCEL, ZNF708, DGKH, TUSC3, MSR1, HLCS, ACSL3, TBCK, HS6ST2, MYO5A, USP32, SMAD2, TBC1D2B, DNM1L, TECPR2, SYT1, MAN2A1, GRAMD1B, SUPT3H, GPR125, NETO1
20504360	MIMAT0004806	hsa-miR-548c-5p	0.91	1.37	0.98	0.19	0.47	0.07	-1.05	0.444109	1.31	0.310165	32	EFHC2, C1QTNF9, L3HYPDH, ZFP69B, GAB1, SLC39A11, CDKAL1, MED6, ROBO1, OSR1, MEI4, TBCEL, ZNF708, DGKH, TUSC3, MSR1, HLCS, ACSL3, TBCK, HS6ST2, MYO5A, USP32, SMAD2, TBC1D2B, DNM1L, TECPR2, SYT1, MAN2A1, GRAMD1B, SUPT3H, GPR125, NETO1
20506834	MIMAT0005895	hsa-miR-548f-3p	1.13	0.94	0.75	0.17	0.21	0.15	1.3	0.177796	1.14	0.377808	27	ARL15, CDH10, DGKH, KCNS2, TMEM194A, MAN2A1, GPR125, MAP4, HS6ST2, MYO5A, NR6A1, ROBO1, TBC1D2B, NETO1, TBCK, TECPR2, HLCS, GRAMD1B, SMAD2, SYT1, ZNF708, MED6, TBCEL, ZBTB40, SUPT3H, USP32, EFHC2
20506870	MIMAT0005928	hsa-miR-548h-5p	1.23	1.02	0.72	0.41	0.23	0.5	1.42	0.670876	1.23	0.961395	32	EFHC2, C1QTNF9, L3HYPDH, ZFP69B, GAB1, SLC39A11, CDKAL1, MED6, ROBO1, OSR1, MEI4, TBCEL, ZNF708, DGKH, TUSC3, MSR1, HLCS, ACSL3, TBCK, HS6ST2, MYO5A, USP32, SMAD2, TBC1D2B, DNM1L, TECPR2, SYT1, MAN2A1, GRAMD1B, SUPT3H, GPR125, NETO1
20506826	MIMAT0005889	hsa-miR-548l	0.68	0.87	1.07	0.24	0.25	0.2	-1.31	0.640833	-1.15	0.68313	24	ZFP69B, EDDM3B, ACSL3, EFHC2, PPP2R3A, C1QTNF9, MYO5A, MEI4, MED6, GAB1, ARL15, TBCEL, ROBO1, KCNH5, TBCK, KCNS2, TBC1D2B, ZNF708, DGKH, USP32, TUSC3, SMAD2, SUPT3H, NETO1
20506859	MIMAT0005917	hsa-miR-548m	1.06	0.67	0.69	0.17	0.45	0.15	1.3	0.167794	-1.01	0.653994	23	ZFP69B, MSR1, SUPT3H, MAN2A1, ZNF708, ARL15, GAB1, TMEM194A, SYT1, SMAD2, C5AR2, ZHX2, KCNS2, TBCK, HLCS, NR6A1, PPP2R3A, TBCEL, MED6, DGKH, ZBTB40, KCNH5, TUSC3
20518781	MIMAT0022738	hsa-miR-548o-5p	0.91	1.37	0.98	0.19	0.47	0.07	-1.05	0.444109	1.31	0.310165	32	EFHC2, C1QTNF9, L3HYPDH, ZFP69B, GAB1, SLC39A11, CDKAL1, MED6, ROBO1, OSR1, MEI4, TBCEL, ZNF708, DGKH, TUSC3, MSR1, HLCS, ACSL3, TBCK, HS6ST2, MYO5A, USP32, SMAD2, TBC1D2B, DNM1L, TECPR2, SYT1, MAN2A1, GRAMD1B, SUPT3H, GPR125, NETO1
20536296	MI0014222	hsa-mir-548w	1.58	1.1	1.2	0.39	0.37	0.12	1.3	0.326626	-1.08	0.595077	32	EFHC2, C1QTNF9, L3HYPDH, ZFP69B, GAB1, SLC39A11, CDKAL1, MED6, ROBO1, OSR1, MEI4, TBCEL, ZNF708, DGKH, TUSC3, MSR1, HLCS, ACSL3, TBCK, HS6ST2, MYO5A, USP32, SMAD2, TBC1D2B, DNM1L, TECPR2, SYT1, MAN2A1, GRAMD1B, SUPT3H, GPR125, NETO1
20536656	MI0016688	hsa-mir-548z	1.27	1.14	0.93	0.19	0.63	0.4	1.27	0.995139	1.16	0.955278	34	KCNH5, COL28A1, MSR1, ZFP69B, STAG1, ROBO1, ZHX2, CDKAL1, HLCS, DGKH, PMM2, CDH10, ARL15, GABRA3, KCNS2, PPP2R3A, GAB1, MAN2A1, SMAD2, TBC1D2B, SYT1, TBCK, GRAMD1B, TBCEL, NETO1, OVOL1, HS6ST2, SUPT3H, ACSL3, MYO5A, ZNF708, DNM1L, MED6, TUSC3
20536657	MI0016688	hsa-mir-548z	1.27	1.11	0.83	0.19	0.55	0.45	1.36	0.864426	1.21	0.97588	34	KCNH5, COL28A1, MSR1, ZFP69B, STAG1, ROBO1, ZHX2, CDKAL1, HLCS, DGKH, PMM2, CDH10, ARL15, GABRA3, KCNS2, PPP2R3A, GAB1, MAN2A1, SMAD2, TBC1D2B, SYT1, TBCK, GRAMD1B, TBCEL, NETO1, OVOL1, HS6ST2, SUPT3H, ACSL3, MYO5A, ZNF708, DNM1L, MED6, TUSC3
20535415	MI0003679	hsa-mir-549a	0.91	1.07	1.38	0.24	0.25	0.18	-1.38	0.294998	-1.24	0.020744	20	GPR125, PPP2R3A, KCNS2, MEI4, NR6A1, TBC1D2B, KCNH5, MSR1, HLCS, TBCK, ZNF708, MYO5A, ZBTB40, GAB1, TBCEL, SMAD2, MED6, GRAMD1B, QPCT, ROBO1
20504324	MIMAT0004800	hsa-miR-550a-5p	2.68	3.43	3.13	0.87	0.73	1.62	-1.37	0.943717	1.23	0.920676	16	ZBTB40, OVOL1, HLCS, GNMT, SSTR3, GABRA3, TBC1D2B, KCNH5, SLC39A11, MEI4, KCNS2, DGKH, TBCK, MAP4, MED6, SMAD2
20504289	MIMAT0004794	hsa-miR-551b-5p	1.5	1.17	0.87	0.52	0.13	0.31	1.54	0.424608	1.23	0.664074	30	EFHC2, GAB1, PUS10, TMEM194A, DGKH, NR6A1, SLC39A11, ROBO1, MSR1, SYT1, TBCEL, SMAD2, PPP2R3A, GRAMD1B, ZHX2, ZFP69B, MAN2A1, ZNF708, TECPR2, KCNH5, MEI4, KCNS2, ACSL3, TBCK, DNM1L, ZBTB40, MYO5A, TUSC3, GPR125, NETO1
20535298	MI0003563	hsa-mir-557	1	1.32	0.93	0.21	0.31	0.05	1.05	0.596998	1.31	0.254968	24	DGKH, KCNH5, MEI4, C1QTNF9, GABRA3, MAN2A1, TECPR2, USP32, ZFP69B, ZNF708, HLCS, OSR1, MSR1, HS6ST2, OVOL1, GAB1, NR6A1, GRAMD1B, DNM1L, MYO5A, SMAD2, TUSC3, SUPT3H, GPR125
20521784	MIMAT0022258	hsa-miR-5571-3p	0.88	1.08	0.57	0.22	0.16	0.15	1.24	0.079601	1.42	0.050317	17	PMM2, PUS10, MEI4, ZFP69B, PPP2R3A, COL28A1, MAP4, ZHX2, OSR1, TUSC3, SSTR3, ACSL3, GRAMD1B, MYO5A, TBC1D2B, SMAD2, NETO1
20521812	MIMAT0022273	hsa-miR-5580-5p	0.78	1.46	0.79	0.12	0.37	0.11	-1	0.976115	1.59	0.108572	17	PMM2, TBC1D2B, ROBO1, SLC39A11, OVOL1, OSR1, TECPR2, MEI4, ZFP69B, TBCEL, GRAMD1B, DGKH, HLCS, ZHX2, GAB1, ZNF708, MYO5A
20521815	MIMAT0022276	hsa-miR-5581-3p	1.67	1.36	1.84	0.63	0.38	0.95	-1.12	0.748979	-1.39	0.330824	20	ARL15, OR2D2, MEI4, SSTR3, KCNS2, SLC39A11, CDH10, GPR89A, USP32, GAB1, HLCS, NR6A1, DGKH, GRAMD1B, ZBTB40, NETO1, ACSL3, MYO5A, TBCEL, SUPT3H
20521819	MIMAT0022280	hsa-miR-5582-3p	1.24	1.11	0.86	0.01	0.08	0.18	1.31	0.070641	1.2	0.250813	25	TMEM194A, HS6ST2, ACSL3, DGKH, KCNH5, ARL15, TBCK, SYT1, MAN2A1, TBCEL, ZNF708, GPR125, KCNS2, HLCS, GRAMD1B, MYO5A, SMAD2, USP32, TBC1D2B, NR6A1, MAP4, ZBTB40, MED6, EFHC2, NETO1
20521818	MIMAT0022279	hsa-miR-5582-5p	0.9	1.01	0.63	0.06	0.17	0.34	1.21	0.657949	1.31	0.64814	17	MSR1, SUPT3H, GRAMD1B, MAN2A1, ZFP69B, GAB1, OVOL1, PMM2, KCNH5, ZHX2, KCNS2, TECPR2, SSTR3, ZNF708, ZBTB40, USP32, SMAD2
20521825	MIMAT0022286	hsa-miR-5585-3p	0.9	1.42	1.73	0.6	0.19	0.36	-1.78	0.428181	-1.24	0.69955	19	PUS10, STAG1, C1QTNF9, ARL15, SYT1, TBCK, KCNS2, TMEM194A, PPP2R3A, GRAMD1B, ZFP69B, ROBO1, HS6ST2, DGKH, ZNF708, TBCEL, GAB1, SMAD2, NETO1
20535300	MI0003565	hsa-mir-559	1.06	1.21	1.44	0.1	0.06	0.37	-1.31	0.177412	-1.17	0.345139	32	EFHC2, C1QTNF9, L3HYPDH, ZFP69B, GAB1, SLC39A11, CDKAL1, MED6, ROBO1, OSR1, MEI4, TBCEL, ZNF708, DGKH, TUSC3, MSR1, HLCS, ACSL3, TBCK, HS6ST2, MYO5A, USP32, SMAD2, TBC1D2B, DNM1L, TECPR2, SYT1, MAN2A1, GRAMD1B, SUPT3H, GPR125, NETO1
20521840	MIMAT0022301	hsa-miR-5591-5p	0.63	1.09	0.7	0.02	0.21	0.05	-1.05	0.183898	1.31	0.163767	17	GAB1, C5AR2, ARL15, OSR1, TUBA1B, MAP4, SSTR3, INCA1, PPP2R3A, ZBTB40, MEI4, PMM2, DGKH, NR6A1, DNM1L, GRAMD1B, TBC1D2B
20504282	MIMAT0003225	hsa-miR-561-3p	1	1.3	0.85	0.05	0.19	0.36	1.11	0.410779	1.36	0.27825	32	ARL15, SLC39A11, ZNF708, MEI4, GPR125, CDKAL1, ROBO1, NETO1, TBCK, GABRA3, STAG1, DGKH, ZFP69B, KCNS2, HS6ST2, TBC1D2B, MAN2A1, MYO5A, TBCEL, L3HYPDH, KCNH5, ZBTB40, GAB1, TMEM194A, ACSL3, USP32, TECPR2, SUPT3H, DNM1L, SMAD2, MED6, EFHC2
20504283	MIMAT0003226	hsa-miR-562	1.02	1.22	0.78	0.15	0.19	0.19	1.18	0.058963	1.36	0.084218	19	GAB1, KCNS2, TBCEL, PUS10, MSR1, DGKH, GABRA3, DNM1L, C5AR2, ZNF708, ZHX2, KCNH5, TMEM194A, TECPR2, ACSL3, SMAD2, ROBO1, GPR125, NETO1
20537195	MI0019281	hsa-mir-5681a	1.23	0.9	0.73	0.18	0.14	0.39	1.41	0.661202	1.13	0.892637	24	ZFP69B, GABRA3, NR6A1, TMEM194A, MAN2A1, USP32, TBCEL, SUPT3H, SYT1, HS6ST2, GAB1, TBCK, PPP2R3A, MAP4, DGKH, ACSL3, SMAD2, KCNS2, MEI4, MYO5A, ARL15, GRAMD1B, ZBTB40, ROBO1
20537196	MI0019281	hsa-mir-5681a	1.25	1.31	1.4	0.2	0.33	0.37	-1.11	0.993834	-1.07	0.861107	24	ZFP69B, GABRA3, NR6A1, TMEM194A, MAN2A1, USP32, TBCEL, SUPT3H, SYT1, HS6ST2, GAB1, TBCK, PPP2R3A, MAP4, DGKH, ACSL3, SMAD2, KCNS2, MEI4, MYO5A, ARL15, GRAMD1B, ZBTB40, ROBO1
20522018	MIMAT0022475	hsa-miR-5685	1.08	0.92	1.46	0.24	0.23	0.04	-1.3	0.089562	-1.45	0.079695	18	SSTR3, TBCK, PMM2, SYT1, NR6A1, SLC39A11, ZHX2, ZBTB40, TBC1D2B, OVOL1, TBCEL, SUPT3H, KCNH5, GAB1, DGKH, STAG1, MED6, SMAD2
20537211	MI0019296	hsa-mir-5691	1.23	0.77	0.75	0.14	0.17	0.11	1.4	0.060318	1.02	0.668024	20	NR6A1, ARL15, ZFP69B, GABRA3, DGKH, GAB1, HS6ST2, ZNF708, USP32, GRAMD1B, TECPR2, PPP2R3A, KCNH5, MAP4, TUSC3, ZBTB40, HLCS, SUPT3H, ROBO1, NETO1
20537217	MI0019302	hsa-mir-5695	1.08	1.06	1.47	0.17	0.11	0.33	-1.31	0.43655	-1.33	0.363575	18	ZFP69B, SLC39A11, ZHX2, GRAMD1B, PPP2R3A, GAB1, SSTR3, USP32, ZNF708, TMEM194A, KCNH5, MAP4, ZBTB40, MYO5A, DGKH, SMAD2, DNM1L, NETO1
20537218	MI0019303	hsa-mir-5696	0.9	0.86	1.24	0.11	0.1	0.11	-1.26	0.03899	-1.3	0.009217	31	TUSC3, ARL15, PPP2R3A, KCNH5, ZFP69B, HS6ST2, MEI4, TBCK, DGKH, HLCS, SYT1, TMEM194A, ZBTB40, ZNF708, MSR1, GAB1, KCNS2, TBC1D2B, ACSL3, MYO5A, MAN2A1, CDH10, TBCEL, USP32, SMAD2, SUPT3H, DNM1L, MED6, ROBO1, NETO1, GPR125
20504293	MIMAT0003235	hsa-miR-570-3p	1.23	1.18	0.8	0.32	0.61	0.25	1.35	0.227382	1.3	0.270394	32	TUBA1B, DGKH, NETO1, EDDM3B, ARL15, KCNH5, L3HYPDH, GAB1, SYT1, ROBO1, C1QTNF9, NR6A1, TBCEL, HS6ST2, KCNS2, ZHX2, INCA1, TUSC3, TBC1D2B, MAN2A1, MYO5A, SMAD2, CDKAL1, PPP2R3A, SSTR3, TECPR2, TMEM194A, ZNF708, ACSL3, ZBTB40, GRAMD1B, QPCT
20522037	MIMAT0022494	hsa-miR-5701	0.86	1.06	0.69	0.07	0.15	0.06	1.12	0.202	1.3	0.073906	22	PUS10, ZFP69B, GPR89A, MYO5A, C1QTNF9, CDKAL1, DGKH, MSR1, SMAD2, ZHX2, KCNH5, GRAMD1B, SYT1, MEI4, ACSL3, ZNF708, GAB1, TECPR2, TUSC3, TBCEL, GPR125, EFHC2
20522038	MIMAT0022495	hsa-miR-5702	1.54	1.03	1.1	0.23	0.14	0.25	1.36	0.278873	-1.05	0.388265	20	PPP2R3A, DNM1L, OSR1, GPR89A, SLC39A11, KCNH5, TBC1D2B, PMM2, TUSC3, DGKH, ZBTB40, SUPT3H, SMAD2, NR6A1, GAB1, SSTR3, ACSL3, GRAMD1B, MED6, NETO1
20522043	MIMAT0022500	hsa-miR-5706	1.19	0.7	0.81	0.25	0.07	0.71	1.3	0.798318	-1.08	0.344806	24	ZFP69B, SIRT4, TMEM194A, TBCK, TECPR2, PMM2, MAN2A1, C1QTNF9, GABRA3, HLCS, C5AR2, ARL15, TBCEL, DGKH, KCNH5, GRAMD1B, SMAD2, TBC1D2B, PPP2R3A, TUSC3, MYO5A, MED6, ZNF708, NETO1
20504297	MIMAT0004795	hsa-miR-574-5p	5.18	4.9	4.68	0.51	1.57	0.25	1.42	0.129263	1.16	0.529077	17	MED6, KIR3DL2, GAB1, TBCK, KCNS2, MEI4, TMEM194A, HLCS, PMM2, MYO5A, SMAD2, DGKH, ZNF708, TECPR2, ZBTB40, NETO1, EFHC2
20504300	MIMAT0003241	hsa-miR-576-5p	0.93	1.4	0.73	0.13	0.24	0.32	1.15	0.723303	1.6	0.155026	26	DGKH, ZFP69B, COL28A1, KCNH5, MYO5A, TBCK, GAB1, HLCS, TMEM194A, SYT1, OVOL1, PPP2R3A, DNM1L, TBC1D2B, TECPR2, GABRA3, NR6A1, MAN2A1, ZNF708, USP32, TBCEL, SMAD2, ACSL3, SUPT3H, GPR125, NETO1
20535318	MI0003585	hsa-mir-578	1.09	1.42	1	0.25	0.48	0.07	1.06	0.54458	1.34	0.300127	27	PUS10, ZFP69B, MAP4, KCNH5, ZNF708, TBCK, HS6ST2, CDKAL1, GPR89A, MSR1, DNM1L, GAB1, MEI4, TBCEL, DGKH, KCNS2, SSTR3, MYO5A, C5AR2, HLCS, SUPT3H, TUSC3, TECPR2, ZBTB40, ROBO1, SMAD2, NETO1
20535328	MI0003595	hsa-mir-587	1.2	1.26	0.85	0.11	0.28	0.08	1.27	0.068381	1.33	0.271413	31	QPCT, ARL15, EFHC2, MED6, MSR1, HS6ST2, GPR89A, KCNH5, C1QTNF9, CDH10, PPP2R3A, ZFP69B, TMEM194A, SLC39A11, MYO5A, KCNS2, HLCS, DGKH, ZNF708, MEI4, NR6A1, STAG1, TBCEL, TECPR2, TUSC3, SMAD2, SSTR3, SUPT3H, ACSL3, ZBTB40, GPR125
20504322	MIMAT0004799	hsa-miR-589-5p	2.8	4.02	4.18	0.55	1.07	0.8	-2.6	0.172612	-1.11	0.688002	15	PPP2R3A, TMEM194A, TBC1D2B, TBCEL, ROBO1, SYT1, KCNH5, NR6A1, ZBTB40, MAN2A1, MYO5A, USP32, SMAD2, QPCT, GPR125
20504330	MIMAT0003261	hsa-miR-593-5p	0.81	1.29	0.7	0.14	0.64	0.66	1.08	0.500172	1.51	0.790276	18	OVOL1, TMEM194A, DGKH, C5AR2, KCNS2, SSTR3, GRAMD1B, KCNH5, INCA1, TBCK, NR6A1, ZBTB40, ZNF708, SMAD2, GABRA3, TECPR2, MED6, NETO1
20535339	MI0003607	hsa-mir-595	1.28	0.95	0.7	0.16	0.09	0.19	1.5	0.20171	1.19	0.491643	19	C5AR2, KIR3DL2, SYT1, TBCK, KCNH5, TECPR2, TMEM194A, ZBTB40, KCNS2, ZNF708, DNM1L, DGKH, GAB1, MAP4, HLCS, MYO5A, TBCEL, SMAD2, L3HYPDH
20504332	MIMAT0003263	hsa-miR-595	1.51	1.69	2.01	0.23	0.52	0.3	-1.42	0.014067	-1.25	0.074002	19	C5AR2, KIR3DL2, SYT1, TBCK, KCNH5, TECPR2, TMEM194A, ZBTB40, KCNS2, ZNF708, DNM1L, DGKH, GAB1, MAP4, HLCS, MYO5A, TBCEL, SMAD2, L3HYPDH
20504346	MIMAT0026621	hsa-miR-605-3p	1.24	0.75	0.87	0.3	0.1	0.23	1.3	0.271294	-1.08	0.999362	19	ZFP69B, SIRT4, ARL15, QPCT, TMEM194A, NR6A1, GABRA3, OVOL1, GAB1, PMM2, DGKH, SSTR3, KCNH5, GRAMD1B, TECPR2, SUPT3H, TUSC3, MYO5A, USP32
20504345	MIMAT0003273	hsa-miR-605-5p	1.8	1.16	1.19	0.51	0.49	0.21	1.52	0.441335	-1.03	0.311473	16	DGKH, TUSC3, PUS10, MEI4, TBCEL, TMEM194A, GPR125, KCNH5, GAB1, COL28A1, TBCK, MED6, ZNF708, SMAD2, ZBTB40, GRAMD1B
20523004	MIMAT0023697	hsa-miR-6072	1.88	1.16	1.1	0.79	0.21	0.23	1.71	0.598311	1.04	0.873571	18	SSTR3, QPCT, SLC39A11, KCNS2, SYT1, SMAD2, DGKH, OVOL1, MYO5A, HLCS, NR6A1, DNM1L, SUPT3H, MAP4, TBCEL, ZNF708, ACSL3, ROBO1
20537254	MI0020358	hsa-mir-6081	1.2	1.1	1.6	0.15	0.14	0.46	-1.32	0.63705	-1.41	0.262778	15	SLC39A11, ARL15, SSTR3, OSR1, KCNS2, NR6A1, TMEM194A, KCNH5, OVOL1, MAP4, DGKH, SUPT3H, ACSL3, GRAMD1B, ZBTB40
20537258	MI0020362	hsa-mir-6085	0.92	1.21	1.58	0.45	0.08	0.29	-1.58	0.43918	-1.3	0.347177	15	ZFP69B, NR6A1, SYT1, TBCEL, EDDM3B, ROBO1, TMEM194A, OVOL1, GABRA3, KCNS2, TECPR2, C5AR2, ZBTB40, SUPT3H, SMAD2
20523017	MIMAT0023710	hsa-miR-6085	6.6	6.84	7.15	0.42	0.12	0.28	-1.46	0.397861	-1.24	0.186254	15	ZFP69B, NR6A1, SYT1, TBCEL, EDDM3B, ROBO1, TMEM194A, OVOL1, GABRA3, KCNS2, TECPR2, C5AR2, ZBTB40, SUPT3H, SMAD2
20523018	MIMAT0023711	hsa-miR-6086	5.1	5.85	5.55	0.21	0.54	0.35	-1.36	0.115939	1.23	0.945961	21	MSR1, CDH10, ROBO1, TUSC3, NR6A1, OVOL1, ACSL3, SSTR3, TBCK, SYT1, MAN2A1, CDKAL1, ZFP69B, TECPR2, ZNF708, DGKH, GRAMD1B, SMAD2, MED6, ZBTB40, NETO1
20535359	MI0003625	hsa-mir-612	1.43	1.88	1.44	0.43	0.13	0.41	-1.01	0.598618	1.35	0.227793	20	CDKAL1, GABRA3, ZFP69B, PMM2, GNMT, C5AR2, SLC39A11, KCNS2, OVOL1, MAP4, GRAMD1B, NR6A1, TECPR2, TBC1D2B, ZNF708, TMEM194A, ZHX2, ZBTB40, SUPT3H, SMAD2
20524034	MIMAT0024597	hsa-miR-6124	4.53	4.09	4.78	0.49	1.25	0.63	-1.19	0.792177	-1.61	0.311587	32	TUBA1B, HLCS, ARL15, ZFP69B, TMEM194A, KCNH5, EDDM3B, DGKH, GRAMD1B, ZHX2, CDKAL1, ZBTB40, GAB1, C1QTNF9, SMAD2, ROBO1, TBC1D2B, GPR89A, TECPR2, HS6ST2, PPP2R3A, ZNF708, SYT1, KCNS2, NR6A1, MYO5A, STAG1, SUPT3H, DNM1L, MED6, TBCEL, NETO1
20537267	MI0021271	hsa-mir-6127	0.98	1.35	0.89	0.14	0.53	0.4	1.07	0.735702	1.37	0.591498	19	KIR3DL2, SSTR3, MAP4, C1QTNF9, GRAMD1B, ARL15, NR6A1, PMM2, TBCEL, ZFP69B, ZBTB40, TMEM194A, MEI4, KCNH5, TBC1D2B, HLCS, MYO5A, DGKH, SMAD2
20537271	MI0021275	hsa-mir-6130	0.94	0.95	1.42	0.3	0.13	0.13	-1.4	0.050931	-1.38	0.007204	19	KIR3DL2, SSTR3, MAP4, C1QTNF9, GRAMD1B, ARL15, NR6A1, PMM2, TBCEL, ZFP69B, ZBTB40, TMEM194A, MEI4, KCNH5, TBC1D2B, HLCS, MYO5A, DGKH, SMAD2
20524052	MIMAT0024615	hsa-miR-6131	1.3	1.07	0.6	0.37	0.38	0.43	1.63	0.332623	1.38	0.416892	29	GNMT, TMEM194A, OVOL1, MSR1, MED6, PUS10, KIR3DL2, C5AR2, NR6A1, ZBTB40, KCNS2, ZHX2, STAG1, DGKH, PPP2R3A, MAN2A1, SSTR3, TBCK, MAP4, MYO5A, SLC39A11, ZNF708, KCNH5, GAB1, DNM1L, TECPR2, SMAD2, TBCEL, ROBO1
20537273	MI0021277	hsa-mir-6132	1.17	1.32	1.06	0.44	0.33	0.35	1.08	0.965616	1.2	0.419371	23	TUBA1B, C1QTNF9, NR6A1, OVOL1, SSTR3, PMM2, MAP4, ARL15, STAG1, NETO1, PPP2R3A, TMEM194A, GABRA3, TECPR2, ZNF708, GRAMD1B, TBC1D2B, USP32, SMAD2, MYO5A, C5AR2, DGKH, EFHC2
20537274	MI0021277	hsa-mir-6132	1.12	1.53	1.03	0.35	0.46	0.35	1.07	0.774468	1.41	0.333468	23	TUBA1B, C1QTNF9, NR6A1, OVOL1, SSTR3, PMM2, MAP4, ARL15, STAG1, NETO1, PPP2R3A, TMEM194A, GABRA3, TECPR2, ZNF708, GRAMD1B, TBC1D2B, USP32, SMAD2, MYO5A, C5AR2, DGKH, EFHC2
20524053	MIMAT0024616	hsa-miR-6132	2.38	2.23	2.83	0.54	0.46	0.48	-1.36	0.94148	-1.51	0.303187	23	TUBA1B, C1QTNF9, NR6A1, OVOL1, SSTR3, PMM2, MAP4, ARL15, STAG1, NETO1, PPP2R3A, TMEM194A, GABRA3, TECPR2, ZNF708, GRAMD1B, TBC1D2B, USP32, SMAD2, MYO5A, C5AR2, DGKH, EFHC2
20537275	MI0021278	hsa-mir-6133	1.18	0.93	1.37	0.22	0.46	0.27	-1.14	0.474325	-1.36	0.622768	19	KIR3DL2, SSTR3, MAP4, C1QTNF9, GRAMD1B, ARL15, NR6A1, PMM2, TBCEL, ZFP69B, ZBTB40, TMEM194A, MEI4, KCNH5, TBC1D2B, HLCS, MYO5A, DGKH, SMAD2
20524054	MIMAT0024617	hsa-miR-6133	2.54	2.63	3.66	0.6	0.72	0.36	-2.18	0.090355	-2.05	0.03254	19	KIR3DL2, SSTR3, MAP4, C1QTNF9, GRAMD1B, ARL15, NR6A1, PMM2, TBCEL, ZFP69B, ZBTB40, TMEM194A, MEI4, KCNH5, TBC1D2B, HLCS, MYO5A, DGKH, SMAD2
20504358	MIMAT0003284	hsa-miR-616-5p	1.43	1.1	1.49	0.51	0.18	0.91	-1.04	0.744128	-1.31	0.406944	24	ZFP69B, NETO1, MAN2A1, TBCEL, DGKH, KCNH5, KCNS2, MSR1, ACSL3, QPCT, C5AR2, GAB1, CDKAL1, ZNF708, GRAMD1B, NR6A1, SSTR3, SMAD2, GABRA3, TBC1D2B, USP32, TBCK, L3HYPDH, EFHC2
20537277	MI0021472	hsa-mir-6165	2.07	2.72	1.61	0.27	0.4	0.54	1.37	0.773342	2.16	0.13742	16	TMEM194A, KCNS2, TBC1D2B, SLC39A11, HS6ST2, MAP4, HLCS, SSTR3, TBCEL, DGKH, NR6A1, GRAMD1B, SMAD2, MYO5A, MED6, NETO1
20535370	MI0003636	hsa-mir-622	1.06	0.93	0.65	0.23	0.1	0.37	1.33	0.256174	1.22	0.651445	17	GPR89A, ARL15, KCNS2, PUS10, COL28A1, GAB1, STAG1, KCNH5, DGKH, ZBTB40, SSTR3, NR6A1, GRAMD1B, SUPT3H, SMAD2, L3HYPDH, TBCEL
20504368	MIMAT0003291	hsa-miR-622	0.7	1.07	2.02	0.18	0.95	0.6	-2.49	0.149352	-1.93	0.946238	17	GPR89A, ARL15, KCNS2, PUS10, COL28A1, GAB1, STAG1, KCNH5, DGKH, ZBTB40, SSTR3, NR6A1, GRAMD1B, SUPT3H, SMAD2, L3HYPDH, TBCEL
20504380	MIMAT0003298	hsa-miR-629-3p	5.75	5.47	5.19	0.27	1.49	0.32	1.47	0.273391	1.21	0.772134	24	COL28A1, KCNS2, ZFP69B, GPR89A, SSTR3, TBCK, HLCS, SYT1, KCNH5, TECPR2, MEI4, GRAMD1B, MAP4, ZHX2, NR6A1, ZNF708, MYO5A, PMM2, USP32, SMAD2, ZBTB40, DNM1L, SUPT3H, QPCT
20535390	MI0003656	hsa-mir-641	1.05	0.83	1.46	0.12	0.41	0.38	-1.33	0.576654	-1.55	0.353415	17	TMEM194A, NETO1, MED6, SLC39A11, TUBA1B, SMAD2, MSR1, NR6A1, ROBO1, DGKH, C5AR2, QPCT, GABRA3, KCNH5, TECPR2, ZNF708, MYO5A
20504394	MIMAT0003311	hsa-miR-641	1.99	1.39	2.13	0.39	0.19	0.43	-1.1	0.378867	-1.67	0.276943	17	TMEM194A, NETO1, MED6, SLC39A11, TUBA1B, SMAD2, MSR1, NR6A1, ROBO1, DGKH, C5AR2, QPCT, GABRA3, KCNH5, TECPR2, ZNF708, MYO5A
20504396	MIMAT0020924	hsa-miR-642a-3p	3.49	3.18	2.24	0.3	0.83	0.32	2.37	0.06687	1.92	0.361504	15	MYO5A, QPCT, DGKH, GABRA3, PMM2, HS6ST2, GAB1, MAP4, TBCEL, SUPT3H, NR6A1, TMEM194A, ZBTB40, GRAMD1B, ZFP69B
20518721	MIMAT0018444	hsa-miR-642b-3p	3.26	3.56	2.61	0.51	1.19	0.91	1.57	0.243995	1.93	0.828146	15	MYO5A, QPCT, DGKH, GABRA3, PMM2, HS6ST2, GAB1, MAP4, TBCEL, SUPT3H, NR6A1, TMEM194A, ZBTB40, GRAMD1B, ZFP69B
20504397	MIMAT0003313	hsa-miR-643	1.04	0.99	1.42	0.15	0.06	0.82	-1.3	0.427304	-1.34	0.444723	16	PUS10, KIR3DL2, MEI4, TBC1D2B, ZNF708, HLCS, ACSL3, DGKH, TMEM194A, MYO5A, KCNH5, ROBO1, USP32, ZBTB40, GPR125, NETO1
20535397	MI0003662	hsa-mir-647	1.28	1.27	0.74	0.11	0.34	0.21	1.45	0.086129	1.44	0.562647	17	PMM2, NR6A1, TMEM194A, GPR125, OSR1, STAG1, GABRA3, GAB1, ZBTB40, MEI4, SSTR3, SMAD2, ZNF708, PPP2R3A, GRAMD1B, ACSL3, NETO1
20504401	MIMAT0003317	hsa-miR-647	1.25	1.19	1.57	0.08	0.07	0.7	-1.26	0.460303	-1.31	0.479328	17	PMM2, NR6A1, TMEM194A, GPR125, OSR1, STAG1, GABRA3, GAB1, ZBTB40, MEI4, SSTR3, SMAD2, ZNF708, PPP2R3A, GRAMD1B, ACSL3, NETO1
20535398	MI0003663	hsa-mir-648	0.88	1.14	0.72	0.11	0.23	0.22	1.12	0.681267	1.34	0.255612	16	TBCK, ARL15, KCNH5, TECPR2, NETO1, GAB1, HLCS, KCNS2, MAN2A1, NR6A1, ZBTB40, DGKH, GRAMD1B, TUSC3, SMAD2, OVOL1
20525003	MIMAT0025458	hsa-miR-6501-5p	1.59	0.99	1.19	0.45	0.31	0.21	1.32	0.303945	-1.15	0.637383	15	CDKAL1, ZFP69B, PUS10, TBCEL, PPP2R3A, NR6A1, KCNS2, KCNH5, ZNF708, TBCK, DGKH, MAP4, DNM1L, SMAD2, TECPR2
20525010	MIMAT0025465	hsa-miR-6504-3p	0.99	1.53	0.75	0.3	0.29	0.27	1.18	0.715379	1.72	0.02099	32	TUBA1B, GPR125, QPCT, ARL15, DGKH, ZFP69B, PMM2, ZNF708, MEI4, C5AR2, HS6ST2, MAN2A1, TBC1D2B, MYO5A, MED6, MSR1, PUS10, KCNS2, PPP2R3A, TMEM194A, TBCEL, GAB1, DNM1L, NR6A1, HLCS, TUSC3, KCNH5, SMAD2, USP32, GRAMD1B, SUPT3H, NETO1
20525011	MIMAT0025466	hsa-miR-6505-5p	1.78	0.95	1.27	0.56	0.34	0.32	1.43	0.147206	-1.25	0.440781	20	SYT1, DNM1L, KIR3DL2, TMEM194A, MEI4, GRAMD1B, MAN2A1, TECPR2, TBCK, ZFP69B, HS6ST2, USP32, ZNF708, TBC1D2B, MYO5A, MAP4, SUPT3H, MED6, SMAD2, ROBO1
20525020	MIMAT0025475	hsa-miR-6509-3p	1.58	1.22	1.84	0.42	0.13	0.52	-1.2	0.162054	-1.54	0.302177	29	MEI4, TBC1D2B, TECPR2, DGKH, ZFP69B, KCNH5, HS6ST2, SYT1, ROBO1, ZNF708, MAN2A1, GABRA3, HLCS, TBCK, COL28A1, OVOL1, USP32, ZHX2, TBCEL, GRAMD1B, KCNS2, NR6A1, SMAD2, TMEM194A, ZBTB40, GAB1, TUSC3, MED6, GPR125
20525021	MIMAT0025476	hsa-miR-6510-5p	4.98	5.01	4.41	0.79	1.52	0.07	1.48	0.710343	1.52	0.9296	19	PUS10, GABRA3, MAP4, OSR1, ZBTB40, TBC1D2B, KCNS2, TMEM194A, HLCS, SSTR3, TBCEL, KCNH5, GRAMD1B, MYO5A, SMAD2, DGKH, MED6, ROBO1, NETO1
20537864	MI0023565	hsa-mir-6511a-3	3.6	3.11	3.51	0.13	0.37	0.35	1.06	0.404469	-1.32	0.375823	21	C5AR2, ZFP69B, ZNF708, HS6ST2, TMEM194A, NR6A1, DGKH, KCNH5, COL28A1, TECPR2, ZBTB40, SSTR3, HLCS, GRAMD1B, MAP4, GAB1, SMAD2, DNM1L, MED6, ROBO1, NETO1
20525024	MIMAT0025479	hsa-miR-6511a-3p	6.38	5.6	5.67	0.25	0.53	0.26	1.63	0.186811	-1.05	0.813068	21	C5AR2, ZFP69B, ZNF708, HS6ST2, TMEM194A, NR6A1, DGKH, KCNH5, COL28A1, TECPR2, ZBTB40, SSTR3, HLCS, GRAMD1B, MAP4, GAB1, SMAD2, DNM1L, MED6, ROBO1, NETO1
20525023	MIMAT0025478	hsa-miR-6511a-5p	3.21	3.33	2.95	1.07	1.18	1.02	1.2	0.144571	1.3	0.639605	19	EDDM3B, NR6A1, DNM1L, SSTR3, STAG1, SMAD2, TBCK, ZBTB40, ZNF708, SLC39A11, CDKAL1, GAB1, TBC1D2B, SUPT3H, KCNH5, MYO5A, TBCEL, TUSC3, ACSL3
20525028	MIMAT0025483	hsa-miR-6513-3p	1.33	0.99	1.47	0.11	0.14	0.28	-1.1	0.66872	-1.39	0.066423	17	SIRT4, KIR3DL2, ZNF708, MED6, C5AR2, GAB1, SMAD2, DGKH, TECPR2, ZBTB40, OVOL1, TBCK, PPP2R3A, TBCEL, GRAMD1B, NR6A1, GPR125
20525032	MIMAT0025487	hsa-miR-6515-3p	0.68	1.26	1.18	0.24	0.35	0.33	-1.42	0.24651	1.05	0.519268	21	SMAD2, SLC39A11, ZNF708, ZFP69B, TBCK, SSTR3, PMM2, MAN2A1, HLCS, ZHX2, ARL15, KCNH5, GRAMD1B, PPP2R3A, NR6A1, DGKH, TECPR2, C5AR2, MYO5A, ZBTB40, GPR125
20529134	MIMAT0030417	hsa-miR-6516-5p	3.55	2.37	3.87	0.2	0.65	1.8	-1.25	0.547834	-2.83	0.667998	22	PAGE3, EDDM3B, ZFP69B, KCNH5, MAN2A1, HLCS, DGKH, OSR1, GABRA3, NR6A1, ZNF708, OVOL1, C5AR2, SSTR3, CDKAL1, TECPR2, SMAD2, ZBTB40, GAB1, MED6, TBCEL, GPR125
20504421	MIMAT0004814	hsa-miR-654-3p	1.48	1.07	1.53	0.48	0.45	0.27	-1.03	0.91418	-1.37	0.555158	15	ZFP69B, SYT1, CDH10, NETO1, TBCK, PPP2R3A, MEI4, ZNF708, ZHX2, TMEM194A, USP32, NR6A1, MED6, ZBTB40, SMAD2
20504430	MIMAT0003337	hsa-miR-659-3p	1.77	1.02	1.21	0.53	0.84	0.27	1.47	0.058376	-1.14	0.397866	18	ZFP69B, NR6A1, HLCS, ROBO1, ZBTB40, GRAMD1B, DGKH, KCNH5, TECPR2, PMM2, MSR1, TBC1D2B, TBCEL, MYO5A, TBCK, SUPT3H, SMAD2, NETO1
20506896	MIMAT0005948	hsa-miR-664a-5p	2.44	3.07	3.41	1.33	0.56	0.4	-1.96	0.506356	-1.27	0.308664	24	ZFP69B, TBC1D2B, ARL15, MEI4, GRAMD1B, SYT1, GPR89A, PPP2R3A, NR6A1, PMM2, TMEM194A, HS6ST2, C5AR2, TBCEL, KCNH5, HLCS, CDKAL1, DGKH, ZNF708, TBCK, SMAD2, MYO5A, QPCT, NETO1
20521811	MIMAT0022272	hsa-miR-664b-3p	1.84	1.6	3.08	0.43	0.76	0.36	-2.37	0.142532	-2.78	0.157325	33	ARL15, SIRT4, TUSC3, STAG1, DGKH, TMEM194A, ZFP69B, MSR1, KCNH5, TBCK, SYT1, PPP2R3A, MYO5A, CDH10, GAB1, MAN2A1, ROBO1, TECPR2, KCNS2, HS6ST2, NR6A1, USP32, HLCS, ZNF708, DNM1L, MEI4, ZBTB40, ACSL3, SUPT3H, SMAD2, TBCEL, GPR125, NETO1
20504588	MIMAT0010357	hsa-miR-670-5p	1.17	0.65	0.74	0.53	0.17	0.23	1.35	0.670872	-1.07	0.986911	21	SLC39A11, MAN2A1, NR6A1, SSTR3, ZFP69B, TMEM194A, MEI4, DGKH, HLCS, KCNH5, TUSC3, SMAD2, ZNF708, DNM1L, TECPR2, C5AR2, PMM2, PPP2R3A, MAP4, MYO5A, ZBTB40
20525380	MIMAT0025841	hsa-miR-6715a-3p	1.86	1.87	1.36	0.35	0.11	0.27	1.41	0.361193	1.42	0.120263	25	SYT1, MAN2A1, KCNS2, ARL15, TBCEL, SLC39A11, ZFP69B, GABRA3, TECPR2, MYO5A, C1QTNF9, GAB1, MAP4, HLCS, ZBTB40, NR6A1, MEI4, DGKH, KCNH5, SMAD2, ZNF708, ROBO1, GPR125, EFHC2, NETO1
20525382	MIMAT0025843	hsa-miR-6715b-3p	1.14	0.98	1.47	0.41	0.16	0.87	-1.26	0.636052	-1.4	0.30949	27	SYT1, KCNS2, SLC39A11, MAN2A1, QPCT, MYO5A, TECPR2, GABRA3, TBCEL, GAB1, KCNH5, NR6A1, DGKH, MEI4, NETO1, MAP4, ZBTB40, ZHX2, HLCS, TBCK, STAG1, TMEM194A, ZNF708, ACSL3, GPR125, MED6, ROBO1
20525383	MIMAT0025844	hsa-miR-6716-5p	3.2	3.67	3.8	0.53	0.84	0.09	-1.51	0.205842	-1.09	0.300868	18	GRAMD1B, TBCK, DGKH, MED6, SYT1, SMAD2, OVOL1, MEI4, C1QTNF9, KCNS2, STAG1, MAP4, HLCS, USP32, ZNF708, TBCEL, KCNH5, SUPT3H
20525390	MIMAT0027345	hsa-miR-6720-5p	3.16	1.98	2.56	0.61	0.77	1.05	1.52	0.134689	-1.49	0.899315	19	SSTR3, OVOL1, ZNF708, MAP4, CDKAL1, PMM2, KIR3DL2, ZFP69B, C5AR2, ROBO1, GRAMD1B, KCNS2, NR6A1, DGKH, ZBTB40, KCNH5, TECPR2, L3HYPDH, QPCT
20525414	MIMAT0027353	hsa-miR-6726-5p	2.38	2.45	1.91	0.44	0.86	0.4	1.39	0.288014	1.46	0.907303	17	GAB1, C5AR2, ARL15, OSR1, TUBA1B, MAP4, SSTR3, INCA1, PPP2R3A, ZBTB40, MEI4, PMM2, DGKH, NR6A1, DNM1L, GRAMD1B, TBC1D2B
20525418	MIMAT0027357	hsa-miR-6728-5p	3.84	4.19	3.62	0.62	1.56	0.26	1.16	0.422286	1.48	0.633935	15	GPR89A, NETO1, GAB1, TMEM194A, PMM2, STAG1, ZBTB40, USP32, KCNS2, ZNF708, MAP4, NR6A1, GRAMD1B, TUSC3, EFHC2
20525424	MIMAT0027363	hsa-miR-6731-5p	1.28	0.97	0.73	0.17	0.06	0.26	1.46	0.078957	1.18	0.615219	26	SMAD2, OSR1, TBCEL, MAP4, ZFP69B, MED6, C1QTNF9, HS6ST2, MYO5A, GABRA3, KCNS2, SLC39A11, MAN2A1, NR6A1, ZHX2, MEI4, GRAMD1B, KCNH5, DGKH, TBC1D2B, STAG1, HLCS, SUPT3H, ACSL3, ZBTB40, DNM1L
20525433	MIMAT0027372	hsa-miR-6735-3p	1.09	1.15	1.62	0.46	0.22	0.49	-1.45	0.934571	-1.39	0.686146	16	PMM2, MEI4, SLC39A11, NR6A1, HLCS, SSTR3, SYT1, PPP2R3A, ZBTB40, KCNH5, MAP4, GRAMD1B, MYO5A, DGKH, MED6, NETO1
20525432	MIMAT0027371	hsa-miR-6735-5p	2.27	3.48	2.42	0.68	0.43	0.61	-1.1	0.785957	2.09	0.011598	19	OVOL1, NR6A1, OSR1, KIR3DL2, MAP4, ZHX2, CDH10, SYT1, ZFP69B, C5AR2, GRAMD1B, DGKH, TBC1D2B, ZBTB40, TMEM194A, SMAD2, SUPT3H, PMM2, MYO5A
20525435	MIMAT0027374	hsa-miR-6736-3p	0.81	1.38	1.58	0.08	0.39	0.46	-1.71	0.199247	-1.15	0.843272	19	C5AR2, TMEM194A, SSTR3, PMM2, OVOL1, PPP2R3A, MED6, ZBTB40, COL28A1, SYT1, TBC1D2B, DNM1L, TECPR2, STAG1, DGKH, SMAD2, GRAMD1B, ZNF708, TBCEL
20525439	MIMAT0027378	hsa-miR-6738-3p	1.9	1.51	1.48	0.61	0.4	0.54	1.34	0.34404	1.02	0.988064	24	GPR125, TBCEL, ZFP69B, KCNS2, TBCK, SSTR3, C5AR2, KCNH5, PPP2R3A, USP32, TMEM194A, HLCS, ZBTB40, NR6A1, GRAMD1B, SMAD2, SUPT3H, MSR1, TUSC3, MAN2A1, MYO5A, ZNF708, DGKH, ACSL3
20525446	MIMAT0027385	hsa-miR-6742-5p	2.17	1.59	2.96	0.71	0.23	0.97	-1.73	0.474599	-2.59	0.152139	15	KCNS2, OVOL1, GNMT, STAG1, MAP4, GRAMD1B, ZBTB40, ZHX2, TECPR2, TBC1D2B, KCNH5, DNM1L, MYO5A, DGKH, SMAD2
20525456	MIMAT0027395	hsa-miR-6747-3p	4.15	3.5	4.31	0.66	1.27	0.33	-1.12	0.67898	-1.76	0.370531	24	C5AR2, PUS10, GRAMD1B, MEI4, PMM2, NR6A1, ZFP69B, TMEM194A, OVOL1, ZBTB40, SSTR3, DGKH, KCNS2, TBCK, KCNH5, ZNF708, TECPR2, PPP2R3A, DNM1L, ZHX2, SUPT3H, HLCS, MYO5A, ACSL3
20505609	MIMAT0006790	hsa-miR-675-3p	3.21	1.67	2.47	1.34	0.87	0.46	1.67	0.57465	-1.74	0.345304	15	L3HYPDH, ZFP69B, MEI4, KIR3DL2, GABRA3, KCNH5, DGKH, TBCK, GAB1, USP32, ZBTB40, HLCS, SMAD2, ZNF708, QPCT
20525467	MIMAT0027406	hsa-miR-6753-5p	4.51	4.21	3.63	0.22	0.72	0.61	1.84	0.072483	1.49	0.445577	15	CDH10, ZFP69B, ROBO1, ARL15, KCNS2, NR6A1, TECPR2, MYO5A, GAB1, SMAD2, ZNF708, TUSC3, GPR125, NETO1, OVOL1
20525470	MIMAT0027409	hsa-miR-6754-3p	2.65	3.49	2.95	0.83	0.78	0.41	-1.23	0.676	1.45	0.12858	16	CDH10, ROBO1, TBCK, STAG1, ZNF708, C5AR2, TBCEL, HLCS, PMM2, KCNS2, NR6A1, GAB1, PPP2R3A, GRAMD1B, SMAD2, TECPR2
20525469	MIMAT0027408	hsa-miR-6754-5p	1.47	1.56	0.95	0.28	0.4	0.75	1.44	0.747416	1.53	0.736118	15	ARL15, MAP4, ZFP69B, GABRA3, KCNS2, SSTR3, NR6A1, PPP2R3A, TBC1D2B, ZBTB40, TMEM194A, DGKH, GRAMD1B, TECPR2, GAB1
20525481	MIMAT0027420	hsa-miR-6760-5p	1.66	1.48	1.18	0.15	0.37	0.14	1.4	0.02819	1.23	0.148723	15	MAP4, COL28A1, TBCEL, MYO5A, CDH10, GRAMD1B, C1QTNF9, SSTR3, CDKAL1, TMEM194A, KCNS2, GABRA3, DGKH, SUPT3H, SMAD2
20525483	MIMAT0027422	hsa-miR-6761-5p	1.24	1.03	0.77	0.26	0.15	0.18	1.38	0.229972	1.2	0.436006	22	TBCK, HLCS, DGKH, MEI4, SLC39A11, TMEM194A, C5AR2, PPP2R3A, ZHX2, GRAMD1B, NR6A1, OVOL1, TBC1D2B, USP32, TUSC3, TBCEL, SUPT3H, MYO5A, SMAD2, TECPR2, ZBTB40, GPR125
20525489	MIMAT0027428	hsa-miR-6764-5p	1.05	0.59	1.01	0.14	0.17	0.53	1.03	0.769924	-1.33	0.494836	20	SSTR3, OVOL1, MAP4, TBCEL, OSR1, NR6A1, TBCK, ZFP69B, ZHX2, MYO5A, HLCS, DNM1L, PMM2, TECPR2, SMAD2, ZBTB40, USP32, DGKH, ZNF708, L3HYPDH
20525492	MIMAT0027431	hsa-miR-6765-3p	2.83	2.29	2.16	0.37	0.64	0.75	1.6	0.548767	1.09	0.757571	19	ZFP69B, GPR89A, PMM2, C5AR2, KCNS2, TMEM194A, PPP2R3A, SSTR3, DGKH, TBC1D2B, GAB1, GRAMD1B, MYO5A, KCNH5, ACSL3, ZNF708, ZBTB40, SMAD2, GPR125
20525497	MIMAT0027436	hsa-miR-6768-5p	2.11	1.12	2.32	0.85	0.71	1.08	-1.15	0.432319	-2.29	0.024618	18	DNM1L, EDDM3B, SYT1, C1QTNF9, NR6A1, TBCEL, ARL15, TBC1D2B, GRAMD1B, MAP4, ACSL3, PPP2R3A, TMEM194A, KCNH5, MYO5A, COL28A1, SMAD2, MED6
20525681	MIMAT0027620	hsa-miR-6769b-5p	6.73	7.35	6.82	0.35	0.24	0.49	-1.07	0.586935	1.44	0.288068	17	PMM2, INCA1, PUS10, TBC1D2B, GRAMD1B, ZFP69B, OVOL1, GABRA3, TBCK, TMEM194A, DGKH, USP32, TECPR2, KCNH5, SMAD2, ZNF708, EFHC2
20525501	MIMAT0027440	hsa-miR-6770-5p	1.11	1.47	1.78	0.7	0.45	0.23	-1.6	0.661567	-1.24	0.6804	23	SIRT4, ZFP69B, CDKAL1, HLCS, ACSL3, TBCK, HS6ST2, MAN2A1, KCNH5, DGKH, MAP4, NR6A1, TBCEL, MYO5A, C5AR2, SSTR3, SMAD2, SUPT3H, MEI4, TBC1D2B, ZHX2, TECPR2, ZNF708
20525514	MIMAT0027453	hsa-miR-6776-3p	1.47	1.66	2.54	0.16	0.23	0.5	-2.1	0.120263	-1.83	0.043296	17	C5AR2, KCNS2, SLC39A11, C1QTNF9, ARL15, MAP4, TBCK, MSR1, USP32, KCNH5, ZNF708, SMAD2, DGKH, MYO5A, MAN2A1, ROBO1, NETO1
20525513	MIMAT0027452	hsa-miR-6776-5p	2.69	2.69	3.15	0.26	0.27	0.4	-1.38	0.506083	-1.38	0.399937	16	PMM2, KCNS2, ZFP69B, CDKAL1, NR6A1, STAG1, TBC1D2B, DNM1L, GAB1, ZBTB40, OVOL1, TBCEL, ZNF708, USP32, MYO5A, DGKH
20525634	MIMAT0027573	hsa-miR-6780b-3p	2.74	1.43	3.11	0.75	1.07	0.62	-1.28	0.023186	-3.19	0.284849	16	HS6ST2, ACSL3, HLCS, SSTR3, MAN2A1, STAG1, ROBO1, GRAMD1B, DGKH, MAP4, NR6A1, TBC1D2B, TECPR2, TBCK, TBCEL, PPP2R3A
20525633	MIMAT0027572	hsa-miR-6780b-5p	3.59	2.3	3.77	0.35	0.89	0.55	-1.13	0.950662	-2.77	0.084684	22	PMM2, ZFP69B, GRAMD1B, ARL15, NR6A1, CDKAL1, GPR89A, ZBTB40, ZHX2, GABRA3, SSTR3, TBC1D2B, DGKH, TBCK, SYT1, MYO5A, ACSL3, GAB1, DNM1L, TBCEL, MED6, ZNF708
20525524	MIMAT0027463	hsa-miR-6781-3p	0.93	0.93	1.67	0.26	0.3	0.44	-1.67	0.279037	-1.66	0.260955	23	SSTR3, MAN2A1, OVOL1, KIR3DL2, TMEM194A, ARL15, ZFP69B, MAP4, OSR1, HLCS, ROBO1, KCNS2, MEI4, ZHX2, GRAMD1B, DNM1L, KCNH5, NR6A1, ZBTB40, TBCEL, TECPR2, TBCK, SMAD2
20525531	MIMAT0027470	hsa-miR-6785-5p	4.84	3.83	4.84	0.57	0.5	0.8	-1.01	0.799076	-2.02	0.100813	26	PMM2, NR6A1, C1QTNF9, MAP4, ZFP69B, CDKAL1, SSTR3, OVOL1, TBCEL, ZHX2, TBC1D2B, OSR1, GRAMD1B, SLC39A11, PPP2R3A, HLCS, ZBTB40, C5AR2, MYO5A, DGKH, TECPR2, SMAD2, USP32, ZNF708, QPCT, GPR125
20525536	MIMAT0027475	hsa-miR-6787-3p	1.44	2.47	1.26	0.08	1.25	0.29	1.13	0.878849	2.32	0.184022	18	COL28A1, C5AR2, GPR89A, OVOL1, MED6, ROBO1, ZNF708, TECPR2, NR6A1, SLC39A11, GRAMD1B, GABRA3, MEI4, PPP2R3A, DGKH, TBCEL, SMAD2, L3HYPDH
20525541	MIMAT0027480	hsa-miR-6790-5p	1.82	1.57	2.47	0.48	1.01	0.47	-1.57	0.729278	-1.87	0.424639	19	MED6, KCNS2, ROBO1, MEI4, MYO5A, PMM2, NETO1, SYT1, MAN2A1, DGKH, HLCS, TBCK, SMAD2, GRAMD1B, TECPR2, ZNF708, ZBTB40, ACSL3, SUPT3H
20525555	MIMAT0027494	hsa-miR-6797-5p	2.34	2.73	1.63	0.64	0.6	0.36	1.64	0.424351	2.15	0.419981	25	MAP4, PMM2, NR6A1, GABRA3, ZFP69B, ZBTB40, SYT1, C1QTNF9, HLCS, TBCEL, GRAMD1B, OVOL1, KCNS2, SSTR3, ZHX2, TBC1D2B, DGKH, MEI4, GAB1, PPP2R3A, TMEM194A, KCNH5, SUPT3H, SMAD2, NETO1
20525563	MIMAT0027502	hsa-miR-6801-5p	2.81	2.01	2.37	1.05	0.74	0.22	1.35	0.594868	-1.29	0.699082	15	TMEM194A, ZBTB40, NR6A1, OSR1, MSR1, TBC1D2B, HS6ST2, OVOL1, MED6, KCNS2, DGKH, ROBO1, KCNH5, TBCEL, SMAD2
20525572	MIMAT0027511	hsa-miR-6805-3p	0.95	1.43	1.01	0.2	0.23	0.18	-1.04	0.871366	1.34	0.227682	20	NR6A1, ARL15, ZFP69B, GABRA3, DGKH, GAB1, HS6ST2, ZNF708, USP32, GRAMD1B, TECPR2, PPP2R3A, KCNH5, MAP4, TUSC3, ZBTB40, HLCS, SUPT3H, ROBO1, NETO1
20525575	MIMAT0027514	hsa-miR-6807-5p	4.51	4.42	3.96	0.43	1.13	0.79	1.47	0.638301	1.38	0.922181	19	ZFP69B, GABRA3, NR6A1, GAB1, MED6, TBCEL, C5AR2, TMEM194A, MAP4, DGKH, PUS10, CDKAL1, ZBTB40, ZNF708, KCNH5, SMAD2, MYO5A, TUSC3, QPCT
20525577	MIMAT0027516	hsa-miR-6808-5p	5.29	5.21	4.88	0.06	1.24	0.38	1.33	0.392888	1.25	0.657684	24	NR6A1, ZFP69B, EDDM3B, GABRA3, TMEM194A, DNM1L, CDKAL1, SSTR3, C5AR2, DGKH, ZBTB40, PMM2, STAG1, ZNF708, PPP2R3A, ZHX2, TBC1D2B, TBCK, SMAD2, GAB1, SUPT3H, TUSC3, GRAMD1B, GPR125
20525587	MIMAT0027526	hsa-miR-6813-5p	1.84	1.28	1.82	0.7	0.13	0.34	1.02	0.737447	-1.46	0.072395	15	ZFP69B, NR6A1, SYT1, TBCEL, EDDM3B, ROBO1, TMEM194A, OVOL1, GABRA3, KCNS2, TECPR2, C5AR2, ZBTB40, SUPT3H, SMAD2
20525592	MIMAT0027531	hsa-miR-6815-3p	0.92	1.62	1.85	0.15	0.24	0.57	-1.91	0.174671	-1.17	0.660451	22	MED6, SLC39A11, TUSC3, GABRA3, ROBO1, PPP2R3A, GRAMD1B, OSR1, TBCK, MAP4, GAB1, NR6A1, SUPT3H, TBC1D2B, SSTR3, HLCS, ZBTB40, MYO5A, KCNH5, ZNF708, SMAD2, TECPR2
20525598	MIMAT0027537	hsa-miR-6818-3p	0.91	1.43	0.9	0.16	0.49	0.1	1.01	0.311922	1.44	0.539597	16	ZFP69B, ZHX2, TMEM194A, SLC39A11, HS6ST2, HLCS, ZNF708, TECPR2, NR6A1, OVOL1, ZBTB40, MYO5A, DGKH, TBCEL, SMAD2, DNM1L
20525615	MIMAT0027554	hsa-miR-6827-5p	1.58	1.03	1.13	0.26	0.04	0.16	1.37	0.108666	-1.07	0.463415	18	ARL15, INCA1, KIR3DL2, ZBTB40, TUBA1B, CDKAL1, OVOL1, GABRA3, GRAMD1B, ZHX2, OSR1, C5AR2, GAB1, PPP2R3A, MAP4, DNM1L, HLCS, DGKH
20525617	MIMAT0027556	hsa-miR-6828-5p	1.11	1.22	0.79	0.17	0.05	0.19	1.25	0.103668	1.34	0.044451	17	SLC39A11, KCNS2, MSR1, SSTR3, HS6ST2, C5AR2, GABRA3, ARL15, KCNH5, ZBTB40, SUPT3H, MAP4, SMAD2, GAB1, TBCEL, DGKH, NETO1
20525619	MIMAT0027558	hsa-miR-6829-5p	2.38	2.19	2.63	0.22	0.88	0.52	-1.19	0.462579	-1.36	0.398304	23	EDDM3B, GABRA3, SLC39A11, GNMT, OVOL1, PMM2, MAP4, TECPR2, TMEM194A, GRAMD1B, ZBTB40, OSR1, CDKAL1, MYO5A, ZFP69B, NR6A1, ZNF708, TBC1D2B, SSTR3, KCNS2, KCNH5, TBCK, GAB1
20525625	MIMAT0027564	hsa-miR-6832-5p	1.21	1.43	1.99	1.06	0.29	0.42	-1.72	0.913951	-1.48	0.067628	16	TBCK, PUS10, GABRA3, MED6, PPP2R3A, NETO1, C5AR2, TMEM194A, SSTR3, DGKH, ZNF708, TECPR2, DNM1L, ACSL3, MYO5A, SMAD2
20525628	MIMAT0027567	hsa-miR-6833-3p	0.94	1.4	1	0.4	0.29	0.14	-1.04	0.737667	1.32	0.229226	29	ZNF708, ARL15, SMAD2, ZFP69B, ACSL3, MSR1, TBCEL, TMEM194A, MAN2A1, MYO5A, DGKH, MEI4, TBCK, KCNS2, KCNH5, NR6A1, TECPR2, ZBTB40, GAB1, CDH10, GRAMD1B, KIR3DL2, PMM2, USP32, TUSC3, DNM1L, HLCS, NETO1, OSR1
20525636	MIMAT0027575	hsa-miR-6836-3p	1	0.8	1.24	0.31	0.12	0.27	-1.18	0.374018	-1.36	0.102375	20	C5AR2, SSTR3, OSR1, GRAMD1B, QPCT, ARL15, ZBTB40, MAP4, ZNF708, TBCK, USP32, OVOL1, KCNS2, GAB1, TECPR2, DNM1L, HLCS, NR6A1, TBCEL, MED6
20525635	MIMAT0027574	hsa-miR-6836-5p	1.98	2.7	2.6	0.52	0.64	0.91	-1.54	0.679104	1.07	0.945515	23	TUBA1B, C1QTNF9, NR6A1, OVOL1, SSTR3, PMM2, MAP4, ARL15, STAG1, NETO1, PPP2R3A, TMEM194A, GABRA3, TECPR2, ZNF708, GRAMD1B, TBC1D2B, USP32, SMAD2, MYO5A, C5AR2, DGKH, EFHC2
20525637	MIMAT0027576	hsa-miR-6837-5p	1.07	2.15	1.21	0.29	0.35	0.72	-1.1	0.500857	1.92	0.448113	17	MAP4, KCNS2, ZHX2, OVOL1, SSTR3, TMEM194A, PMM2, HLCS, STAG1, NR6A1, ZNF708, TBCEL, TBC1D2B, GAB1, GRAMD1B, MYO5A, SMAD2
20525641	MIMAT0027580	hsa-miR-6839-5p	1.23	1.06	0.73	0.17	0.01	0.4	1.41	0.664964	1.25	0.714271	15	ZFP69B, TBCK, NR6A1, DGKH, SMAD2, MAN2A1, TBCEL, TUSC3, ZHX2, GRAMD1B, ZBTB40, SUPT3H, USP32, KCNH5, ZNF708
20537589	MI0022690	hsa-mir-6844	1.23	1.24	0.76	0.37	0.38	0.07	1.39	0.132693	1.4	0.244286	28	COL28A1, ARL15, MED6, C5AR2, TBCEL, KCNH5, SLC39A11, MAP4, NETO1, TMEM194A, KCNS2, MEI4, MYO5A, NR6A1, ZFP69B, HLCS, SYT1, TBCK, ROBO1, ZNF708, TECPR2, DGKH, GRAMD1B, GAB1, SUPT3H, SMAD2, GPR125, EFHC2
20525655	MIMAT0027594	hsa-miR-6847-5p	2.31	2.58	1.84	0.63	0.71	0.47	1.38	0.601429	1.66	0.214436	21	INCA1, OVOL1, ARL15, PUS10, TMEM194A, DGKH, C5AR2, TBC1D2B, SSTR3, GABRA3, ROBO1, ZBTB40, MYO5A, ZHX2, MAP4, SYT1, GAB1, TUSC3, KCNH5, TECPR2, NETO1
20525660	MIMAT0027599	hsa-miR-6849-3p	1.6	0.93	1.3	0.31	0.2	0.29	1.23	0.397451	-1.3	0.015235	22	SSTR3, C5AR2, GPR89A, OVOL1, MAP4, KCNS2, ROBO1, ZFP69B, CDKAL1, ZNF708, PMM2, TECPR2, NR6A1, DGKH, TBCEL, GRAMD1B, TBC1D2B, HLCS, ZBTB40, DNM1L, L3HYPDH, QPCT
20525672	MIMAT0027611	hsa-miR-6855-3p	1.7	1.49	1.26	0.43	0.23	0.32	1.35	0.438866	1.17	0.03596	15	MSR1, MEI4, C5AR2, PPP2R3A, MAP4, MAN2A1, TBCK, MYO5A, ROBO1, TBC1D2B, KCNS2, USP32, TMEM194A, ZBTB40, KCNH5
20525678	MIMAT0027617	hsa-miR-6858-3p	2.37	2.19	2.93	0.61	0.47	0.35	-1.48	0.391911	-1.67	0.163602	16	OVOL1, TMEM194A, SSTR3, PMM2, ZFP69B, KCNS2, DNM1L, DGKH, MAN2A1, TECPR2, TBCK, GRAMD1B, SMAD2, ZBTB40, MED6, QPCT
20537606	MI0022707	hsa-mir-6860	2.67	2.98	2.52	0.24	0.46	0.53	1.11	0.683209	1.37	0.392124	20	CDKAL1, GABRA3, ZFP69B, PMM2, GNMT, C5AR2, SLC39A11, KCNS2, OVOL1, MAP4, GRAMD1B, NR6A1, TECPR2, TBC1D2B, ZNF708, TMEM194A, ZHX2, ZBTB40, SUPT3H, SMAD2
20525683	MIMAT0027622	hsa-miR-6860	2.64	2.26	3.15	0.56	1.76	0.21	-1.43	0.332623	-1.86	0.611251	20	CDKAL1, GABRA3, ZFP69B, PMM2, GNMT, C5AR2, SLC39A11, KCNS2, OVOL1, MAP4, GRAMD1B, NR6A1, TECPR2, TBC1D2B, ZNF708, TMEM194A, ZHX2, ZBTB40, SUPT3H, SMAD2
20525687	MIMAT0027626	hsa-miR-6862-3p	3.05	2.96	4.24	0.45	1.39	0.48	-2.28	0.20558	-2.42	0.135046	18	C5AR2, HS6ST2, TBC1D2B, GRAMD1B, ZFP69B, SSTR3, TMEM194A, MYO5A, TECPR2, DGKH, ZNF708, ZBTB40, GAB1, NR6A1, KCNH5, HLCS, DNM1L, SMAD2
20525686	MIMAT0027625	hsa-miR-6862-5p	2.33	2.08	1.69	0.48	0.43	0.45	1.56	0.747946	1.31	0.674929	16	CDKAL1, C5AR2, GRAMD1B, MAP4, HLCS, MSR1, STAG1, GABRA3, DGKH, KCNS2, OVOL1, TBC1D2B, KCNH5, TECPR2, SMAD2, MED6
20525695	MIMAT0027634	hsa-miR-6867-5p	2.64	1.53	1.6	1.15	0.75	0.76	2.05	0.420775	-1.05	0.362297	16	TECPR2, TBCK, DGKH, MAN2A1, STAG1, MYO5A, GAB1, NETO1, NR6A1, MAP4, TBC1D2B, GRAMD1B, ZNF708, SMAD2, TBCEL, EFHC2
20525701	MIMAT0027640	hsa-miR-6870-5p	2.45	2.05	3.97	0.52	0.76	1.06	-2.87	0.393339	-3.81	0.216212	17	ZFP69B, MAP4, TMEM194A, CDKAL1, GRAMD1B, NR6A1, SLC39A11, GABRA3, OVOL1, DGKH, SSTR3, SMAD2, MYO5A, HLCS, ZNF708, TBCK, PPP2R3A
20525710	MIMAT0027649	hsa-miR-6874-3p	1.4	0.83	0.85	0.28	0.22	0.28	1.47	0.231951	-1.01	0.096543	16	NETO1, GPR89A, TBCEL, MEI4, GABRA3, TMEM194A, SYT1, DGKH, TBCK, KCNH5, SMAD2, TUSC3, ZNF708, MYO5A, ACSL3, EFHC2
20525712	MIMAT0027651	hsa-miR-6875-3p	2.37	1.57	1.66	0.61	0.63	0.54	1.64	0.01022	-1.07	0.752745	29	TBC1D2B, STAG1, KRT33A, CDKAL1, ROBO1, MED6, ZFP69B, DGKH, SLC39A11, TBCK, SSTR3, MAN2A1, NETO1, SMAD2, CDH10, ZNF708, PPP2R3A, KCNH5, MAP4, ACSL3, GRAMD1B, ZHX2, HLCS, TECPR2, ZBTB40, DNM1L, EFHC2, QPCT, GPR125
20525726	MIMAT0027665	hsa-miR-6882-3p	1.48	0.84	1.31	0.75	0.26	0.32	1.13	0.16807	-1.39	0.323427	16	C5AR2, GABRA3, MYO5A, SLC39A11, MEI4, TMEM194A, OVOL1, MSR1, ZBTB40, TECPR2, OSR1, MAP4, MED6, NR6A1, GRAMD1B, DGKH
20525732	MIMAT0027671	hsa-miR-6885-3p	1.75	1.21	1.05	0.39	0.44	1.01	1.62	0.849707	1.11	0.544621	23	MED6, ASNS, GAB1, MEI4, PPP2R3A, TUSC3, KCNH5, ACSL3, SYT1, ZHX2, ZNF708, DGKH, MYO5A, TBCK, ROBO1, MAN2A1, TMEM194A, HS6ST2, GRAMD1B, CDKAL1, TBCEL, HLCS, NETO1
20525741	MIMAT0027680	hsa-miR-6890-5p	2.25	2.43	2.76	0.37	0.6	0.77	-1.43	0.670262	-1.25	0.771512	15	GABRA3, TBC1D2B, TMEM194A, ZFP69B, NR6A1, PPP2R3A, KCNH5, TBCK, HLCS, DGKH, ZBTB40, SUPT3H, TECPR2, ZNF708, NETO1
20525744	MIMAT0027683	hsa-miR-6891-3p	1.24	1.15	0.79	0.13	0.25	0.13	1.36	0.017422	1.28	0.357095	18	SSTR3, QPCT, SLC39A11, KCNS2, SYT1, SMAD2, DGKH, OVOL1, MYO5A, HLCS, NR6A1, DNM1L, SUPT3H, MAP4, TBCEL, ZNF708, ACSL3, ROBO1
20525747	MIMAT0027686	hsa-miR-6893-5p	4.65	4.99	5.12	0.21	0.89	0.73	-1.38	0.818692	-1.09	0.390848	24	NR6A1, ZFP69B, EDDM3B, GABRA3, TMEM194A, DNM1L, CDKAL1, SSTR3, C5AR2, DGKH, ZBTB40, PMM2, STAG1, ZNF708, PPP2R3A, ZHX2, TBC1D2B, TBCK, SMAD2, GAB1, SUPT3H, TUSC3, GRAMD1B, GPR125
20525749	MIMAT0027688	hsa-miR-6894-5p	2.72	2.71	2.17	0.91	0.7	0.41	1.46	0.191836	1.45	0.301952	22	TBCK, C1QTNF9, OSR1, INCA1, HLCS, COL28A1, NR6A1, MAP4, GABRA3, OVOL1, GRAMD1B, KCNS2, SUPT3H, ZNF708, DNM1L, MYO5A, DGKH, GAB1, ZBTB40, PPP2R3A, TUSC3, ACSL3
20500436	MIMAT0004553	hsa-miR-7-1-3p	3.36	4.12	3.61	1.03	1.07	0.65	-1.19	0.978394	1.43	0.955386	34	MED6, KCNH5, CDH10, DNM1L, GAB1, ZFP69B, NETO1, GPR125, ZNF708, STAG1, TBCEL, DGKH, MEI4, MSR1, KCNS2, ZHX2, HLCS, NR6A1, TBCK, SYT1, PUS10, GRAMD1B, GABRA3, ACSL3, MYO5A, SMAD2, ROBO1, C1QTNF9, TECPR2, TUSC3, ZBTB40, USP32, SUPT3H, L3HYPDH
20534509	MI0000264	hsa-mir-7-2	1	0.95	1.4	0.51	0.23	0.16	-1.33	0.740145	-1.37	0.162684	34	MED6, KCNH5, CDH10, DNM1L, GAB1, ZFP69B, NETO1, GPR125, ZNF708, STAG1, TBCEL, DGKH, MSR1, MEI4, KCNS2, HLCS, ZHX2, NR6A1, TBCK, SYT1, PUS10, GRAMD1B, GABRA3, ACSL3, MYO5A, SMAD2, C1QTNF9, ROBO1, TECPR2, TUSC3, ZBTB40, USP32, SUPT3H, L3HYPDH
20526179	MIMAT0028118	hsa-miR-7110-3p	1.32	1.2	0.94	0.24	0.12	0.37	1.3	0.603098	1.2	0.588033	18	ARL15, ZFP69B, ZNF708, TBCEL, SMAD2, OSR1, GRAMD1B, ZHX2, NR6A1, HLCS, MAN2A1, KCNH5, MYO5A, DGKH, TECPR2, TMEM194A, USP32, ZBTB40
20526178	MIMAT0028117	hsa-miR-7110-5p	5.48	5.65	5.05	0.22	0.38	0.29	1.36	0.221963	1.53	0.496319	17	PMM2, TMEM194A, GABRA3, SSTR3, NR6A1, ZFP69B, OVOL1, OSR1, PPP2R3A, DGKH, KCNS2, HLCS, TECPR2, MAP4, MYO5A, DNM1L, USP32
20526180	MIMAT0028119	hsa-miR-7111-5p	4.03	4.75	4.25	0.4	0.49	0.65	-1.17	0.477371	1.41	0.807302	17	ZFP69B, MAP4, TMEM194A, CDKAL1, GRAMD1B, NR6A1, SLC39A11, GABRA3, OVOL1, DGKH, SSTR3, SMAD2, MYO5A, HLCS, ZNF708, TBCK, PPP2R3A
20526184	MIMAT0028123	hsa-miR-7113-5p	1.55	1.32	1	0.18	0.42	0.32	1.46	0.261319	1.25	0.56693	18	MAP4, ZFP69B, KCNS2, OVOL1, TBCEL, ZBTB40, TMEM194A, OSR1, TBCK, TECPR2, SSTR3, GRAMD1B, TBC1D2B, MYO5A, GAB1, ZNF708, SMAD2, HLCS
20526861	MIMAT0028211	hsa-miR-7150	4.22	4.23	4.76	0.32	0.85	0.09	-1.45	0.082854	-1.44	0.40896	25	NR6A1, PPP2R3A, GABRA3, ARL15, CDKAL1, STAG1, KCNH5, CDH10, TBC1D2B, TBCK, OVOL1, SLC39A11, TBCEL, ZBTB40, KCNS2, ZHX2, ZFP69B, SSTR3, DGKH, TECPR2, SUPT3H, MYO5A, MAN2A1, ACSL3, SMAD2
20526871	MIMAT0028221	hsa-miR-7155-3p	0.9	0.85	2.08	0.08	0.4	0.25	-2.26	0.024887	-2.34	0.104277	17	KCNS2, ZFP69B, NR6A1, TBCK, HS6ST2, OVOL1, CDKAL1, ZHX2, ROBO1, HLCS, MAP4, SMAD2, ZBTB40, DGKH, MYO5A, GRAMD1B, MED6
20526882	MIMAT0028230	hsa-miR-7160-5p	1.46	0.88	1.67	0.35	0.63	0.56	-1.16	0.319223	-1.73	0.540519	19	CDKAL1, TUSC3, NR6A1, NETO1, MSR1, GPR89A, C5AR2, TECPR2, OVOL1, TBC1D2B, TBCK, MYO5A, ZNF708, ZFP69B, GRAMD1B, MAN2A1, SUPT3H, SMAD2, ZBTB40
20526879	MIMAT0028233	hsa-miR-7161-3p	0.66	1.65	0.89	0.14	0.44	0.15	-1.17	0.420366	1.7	0.193181	18	HS6ST2, OVOL1, MAN2A1, ZHX2, PPP2R3A, ROBO1, SUPT3H, ACSL3, SSTR3, DGKH, HLCS, DNM1L, GAB1, KCNH5, NR6A1, TUSC3, SMAD2, MED6
20526878	MIMAT0028232	hsa-miR-7161-5p	1.56	0.94	1.03	0.28	0.02	0.04	1.45	0.177881	-1.06	0.055294	27	PAGE3, C1QTNF9, GNMT, L3HYPDH, ARL15, MSR1, TMEM194A, HLCS, CDKAL1, GABRA3, KCNH5, QPCT, TBCK, SMAD2, NR6A1, DGKH, ZFP69B, MAN2A1, MYO5A, TBC1D2B, MED6, ZNF708, GAB1, GRAMD1B, ZBTB40, ACSL3, TBCEL
20505788	MIMAT0004946	hsa-miR-744-3p	4.71	3.09	3.2	1.12	0.78	0.91	2.84	0.395217	-1.08	0.076647	17	ZFP69B, PUS10, CDKAL1, SUPT3H, TBCEL, MAN2A1, PPP2R3A, DNM1L, TBCK, ZNF708, TECPR2, NR6A1, GAB1, MAP4, DGKH, USP32, SMAD2
20504593	MIMAT0010364	hsa-miR-761	1.07	1.56	0.81	0.21	0.39	0.21	1.2	0.406606	1.69	0.150769	20	SLC39A11, KIR3DL2, MAP4, OSR1, SYT1, NR6A1, SSTR3, TMEM194A, PMM2, MEI4, KCNH5, ZBTB40, TBC1D2B, MYO5A, ZNF708, DGKH, SMAD2, QPCT, GPR125, NETO1
20504594	MIMAT0010367	hsa-miR-764	1.1	1.32	1.63	0.66	0.14	0.52	-1.44	0.400965	-1.23	0.52772	20	GPR89A, OVOL1, SYT1, MEI4, MAP4, GAB1, TBC1D2B, USP32, DGKH, NR6A1, MYO5A, ZFP69B, ZNF708, KCNH5, DNM1L, SUPT3H, SMAD2, SSTR3, NETO1, ARL15
20505206	MIMAT0003945	hsa-miR-765	0.99	1.25	1.57	0.61	0.2	0.06	-1.49	0.574095	-1.25	0.139514	24	OSR1, MAP4, NR6A1, C1QTNF9, GABRA3, INCA1, GRAMD1B, TBCK, HLCS, COL28A1, KCNS2, ZFP69B, PPP2R3A, GAB1, OVOL1, SUPT3H, TBC1D2B, MYO5A, ZBTB40, ZNF708, DNM1L, ACSL3, DGKH, TUSC3
20529142	MIMAT0030425	hsa-miR-7850-5p	1.08	1.14	0.67	0.18	0.18	0.02	1.33	0.122153	1.38	0.050437	17	SMAD2, HS6ST2, MEI4, KCNS2, TECPR2, NETO1, KCNH5, TBC1D2B, MAP4, GAB1, ZNF708, SYT1, GRAMD1B, ZFP69B, TBCK, ZBTB40, MYO5A
20529143	MIMAT0030426	hsa-miR-7851-3p	1.26	1.44	1.65	0.27	0.08	0.26	-1.31	0.145776	-1.15	0.18004	15	NR6A1, KCNS2, PMM2, TBCEL, SSTR3, TECPR2, GRAMD1B, MEI4, ZNF708, DNM1L, ZFP69B, TUSC3, MYO5A, ZBTB40, ROBO1
20537997	MI0025524	hsa-mir-7854	1.48	1.1	0.89	0.48	0.12	0.09	1.51	0.068997	1.16	0.162334	21	OVOL1, TECPR2, ZNF708, PUS10, ZFP69B, SSTR3, COL28A1, DGKH, ZHX2, GABRA3, TMEM194A, PPP2R3A, MAP4, GAB1, SMAD2, GRAMD1B, ZBTB40, MYO5A, MED6, QPCT, EFHC2
20529146	MIMAT0030429	hsa-miR-7854-3p	2.83	1.87	2.35	0.81	0.67	0.49	1.39	0.279111	-1.39	0.649215	21	OVOL1, TECPR2, ZNF708, PUS10, ZFP69B, SSTR3, COL28A1, DGKH, ZHX2, GABRA3, TMEM194A, PPP2R3A, MAP4, GAB1, SMAD2, GRAMD1B, ZBTB40, MYO5A, MED6, QPCT, EFHC2
20529147	MIMAT0030430	hsa-miR-7855-5p	1.7	1.7	1.26	0.43	0.64	0.12	1.36	0.274387	1.36	0.310164	16	TECPR2, TMEM194A, MSR1, HS6ST2, ZHX2, PMM2, PPP2R3A, DGKH, TBCK, ROBO1, TBC1D2B, ZNF708, STAG1, DNM1L, MED6, KCNH5
20529764	MIMAT0030981	hsa-miR-8054	1.11	1.25	0.85	0.27	0.2	0.27	1.19	0.299313	1.31	0.229974	20	MED6, TUSC3, MEI4, EFHC2, ZFP69B, C1QTNF9, ROBO1, DGKH, ZNF708, ACSL3, GAB1, MAN2A1, TBCEL, ZBTB40, TBCK, SMAD2, GRAMD1B, MYO5A, USP32, NETO1
20529770	MIMAT0030987	hsa-miR-8060	3.88	4.55	4	0.59	0.78	0.62	-1.09	0.730888	1.46	0.041826	20	CFC1B, HS6ST2, PPP2R3A, TMEM194A, MSR1, GRAMD1B, TBCEL, DGKH, USP32, GABRA3, KCNH5, DNM1L, KCNS2, ZNF708, ACSL3, SMAD2, ZBTB40, MED6, NETO1, TECPR2
20529773	MIMAT0030990	hsa-miR-8063	1.27	2.7	1.49	0.52	0.61	0.6	-1.17	0.517212	2.3	0.132939	29	HS6ST2, NETO1, DGKH, MAN2A1, TBCEL, KCNH5, GAB1, TUSC3, NR6A1, TMEM194A, KCNS2, HLCS, TBCK, ZNF708, ZBTB40, C5AR2, PUS10, MSR1, ZFP69B, SLC39A11, USP32, SMAD2, MYO5A, ACSL3, SUPT3H, EFHC2, MED6, GPR125, QPCT
20529783	MIMAT0031000	hsa-miR-8073	2.2	3.58	3.16	0.21	1.33	0.37	-1.94	0.011887	1.34	0.999305	20	ZFP69B, TMEM194A, ZNF708, TECPR2, DRD3, TBC1D2B, NR6A1, COL28A1, MAP4, PMM2, SSTR3, C5AR2, KCNS2, GRAMD1B, DGKH, GAB1, ACSL3, SUPT3H, SMAD2, L3HYPDH
20538034	MI0025911	hsa-mir-8075	2.42	2.89	2.29	0.14	0.63	0.19	1.09	0.713459	1.52	0.452753	15	ZFP69B, GPR89A, TBCK, MEI4, ROBO1, GRAMD1B, GABRA3, SSTR3, TMEM194A, ZBTB40, ZNF708, DGKH, SMAD2, MYO5A, TECPR2
20538035	MI0025911	hsa-mir-8075	1.98	2.67	1.83	0.15	0.66	0.22	1.11	0.393292	1.79	0.358615	15	ZFP69B, GPR89A, TBCK, MEI4, ROBO1, GRAMD1B, GABRA3, SSTR3, TMEM194A, ZBTB40, ZNF708, DGKH, SMAD2, MYO5A, TECPR2
20529785	MIMAT0031002	hsa-miR-8075	8.03	9.04	8.69	0.58	0.78	0.43	-1.58	0.823475	1.28	0.446057	15	ZFP69B, GPR89A, TBCK, MEI4, ROBO1, GRAMD1B, GABRA3, SSTR3, TMEM194A, ZBTB40, ZNF708, DGKH, SMAD2, MYO5A, TECPR2
20529790	MIMAT0031007	hsa-miR-8080	0.94	1.24	0.86	0.13	0.43	0.08	1.06	0.519861	1.3	0.572154	17	SYT1, MAP4, TMEM194A, OSR1, HLCS, ARL15, DGKH, NR6A1, OVOL1, SSTR3, GRAMD1B, DNM1L, SMAD2, ZNF708, MED6, QPCT, NETO1
20529794	MIMAT0031011	hsa-miR-8084	0.88	0.83	1.5	0.15	0.34	0.15	-1.53	0.055468	-1.59	0.156296	19	MEI4, MSR1, ZNF708, ARL15, ZFP69B, GAB1, TBCK, SYT1, DGKH, OSR1, NR6A1, TUSC3, TBCEL, TMEM194A, PPP2R3A, MED6, HLCS, SMAD2, GPR125
20529795	MIMAT0031012	hsa-miR-8085	2.39	3.08	3.41	0.43	1.25	1.16	-2.04	0.402098	-1.26	0.639466	26	SMAD2, OSR1, TBCEL, MAP4, ZFP69B, MED6, C1QTNF9, HS6ST2, MYO5A, GABRA3, KCNS2, SLC39A11, MAN2A1, NR6A1, ZHX2, MEI4, GRAMD1B, KCNH5, DGKH, TBC1D2B, STAG1, HLCS, SUPT3H, ACSL3, ZBTB40, DNM1L
20538049	MI0025925	hsa-mir-8089	1.27	1.54	1.15	0.41	0.29	0.11	1.08	0.81581	1.31	0.307294	17	NR6A1, OVOL1, MAP4, GRAMD1B, TBC1D2B, SSTR3, ZBTB40, DGKH, ZHX2, TBCK, MSR1, KCNS2, DNM1L, SUPT3H, TECPR2, TBCEL, MED6
20529799	MIMAT0031016	hsa-miR-8089	5.04	5.36	5.5	0.21	0.41	0.27	-1.38	0.549592	-1.1	0.287201	17	NR6A1, OVOL1, MAP4, GRAMD1B, TBC1D2B, SSTR3, ZBTB40, DGKH, ZHX2, TBCK, MSR1, KCNS2, DNM1L, SUPT3H, TECPR2, TBCEL, MED6
20505757	MIMAT0004923	hsa-miR-875-3p	1.21	0.88	0.77	0.2	0.43	0.25	1.36	0.241466	1.08	0.732949	32	TMEM194A, ZFP69B, SYT1, CDKAL1, C1QTNF9, HS6ST2, PUS10, PMM2, TBCEL, MAN2A1, HLCS, OVOL1, TECPR2, ARL15, ZHX2, KCNH5, MSR1, DGKH, TBC1D2B, KCNS2, MYO5A, DNM1L, STAG1, GRAMD1B, ZBTB40, C5AR2, SMAD2, SUPT3H, ZNF708, GAB1, MED6, NETO1
20505792	MIMAT0004950	hsa-miR-877-3p	1.6	2.38	1.69	0.2	0.74	0.1	-1.07	0.172423	1.61	0.568702	20	SSTR3, SLC39A11, STAG1, HLCS, MYO5A, ZHX2, C5AR2, ZFP69B, SMAD2, KCNH5, PMM2, ZNF708, GRAMD1B, TBCEL, MAP4, NR6A1, DGKH, TECPR2, DNM1L, ACSL3
20505790	MIMAT0004948	hsa-miR-885-3p	1.71	1.5	2.07	0.09	0.47	0.7	-1.29	0.519916	-1.49	0.332253	16	DRD3, SSTR3, TBC1D2B, ZFP69B, ZBTB40, HLCS, MAN2A1, TECPR2, NR6A1, TMEM194A, KCNH5, OSR1, DNM1L, GAB1, DGKH, L3HYPDH
20505754	MIMAT0026719	hsa-miR-889-5p	1.28	0.68	1.05	0.37	0.27	0.1	1.17	0.877391	-1.3	0.261334	17	ZFP69B, TBCEL, SYT1, PMM2, ROBO1, TMEM194A, TBCK, MAP4, KCNH5, NR6A1, TECPR2, STAG1, ZHX2, GRAMD1B, DNM1L, SMAD2, TBC1D2B
20535641	MI0005533	hsa-mir-890	1.38	1.06	0.92	0.11	0.16	0.12	1.38	0.055272	1.11	0.808877	15	MEI4, GAB1, PPP2R3A, TBC1D2B, MAN2A1, DGKH, NR6A1, TBCEL, CDKAL1, ZHX2, ZFP69B, ZBTB40, SUPT3H, SMAD2, HLCS
20534614	MI0000468	hsa-mir-9-3	0.93	1.06	1.31	0.16	0.57	0.27	-1.3	0.198597	-1.18	0.904844	18	MEI4, C1QTNF9, DGKH, HLCS, KCNH5, SYT1, SIRT4, TBCEL, ZFP69B, TBCK, HS6ST2, SMAD2, TMEM194A, TBC1D2B, NR6A1, MAN2A1, TUSC3, NETO1
20505962	MIMAT0004971	hsa-miR-921	2.07	0.93	1.48	0.78	0.14	0.26	1.5	0.753504	-1.47	0.019732	15	KCNS2, COL28A1, TBC1D2B, MAN2A1, ZFP69B, NR6A1, ROBO1, DGKH, KCNH5, TBCK, HLCS, MYO5A, GAB1, SMAD2, ACSL3
20506006	MIMAT0022938	hsa-miR-937-5p	6.91	6.66	6.43	0.25	0.09	0.37	1.4	0.493974	1.18	0.791785	17	DNM1L, GPR89A, PPP2R3A, CDKAL1, PMM2, TMEM194A, DGKH, TBC1D2B, SSTR3, SLC39A11, KCNH5, SUPT3H, TUSC3, ACSL3, SMAD2, MYO5A, NETO1
20506011	MIMAT0004983	hsa-miR-940	2.62	2.21	1.69	0.56	0.59	0.23	1.91	0.232346	1.44	0.21857	24	NR6A1, ZFP69B, EDDM3B, GABRA3, TMEM194A, DNM1L, CDKAL1, SSTR3, C5AR2, DGKH, ZBTB40, PMM2, STAG1, ZNF708, PPP2R3A, ZHX2, TBC1D2B, TBCK, SMAD2, GAB1, SUPT3H, TUSC3, GRAMD1B, GPR125
20506014	MIMAT0026734	hsa-miR-942-3p	1.54	1.07	1.54	0.38	1.01	0.5	1	0.458782	-1.39	0.821479	17	GABRA3, ARL15, MAP4, TECPR2, NR6A1, ZBTB40, TBCEL, TBCK, KCNH5, MEI4, ZFP69B, HS6ST2, DGKH, TBC1D2B, ZNF708, EFHC2, SUPT3H
20506016	MIMAT0004987	hsa-miR-944	2.13	1.2	1.24	1.18	0.1	0.39	1.85	0.320863	-1.02	0.305504	29	ARL15, DGKH, TBCEL, KCNH5, TMEM194A, MSR1, MAN2A1, GAB1, MEI4, QPCT, GRAMD1B, ZNF708, KCNS2, SYT1, CDKAL1, ZFP69B, SMAD2, EFHC2, PPP2R3A, ZBTB40, MYO5A, STAG1, TECPR2, USP32, ACSL3, TUSC3, ROBO1, NETO1, GPR125

## Sheet: HCC1395
Transcript Cluster	Accession	miRNA	GapmeR 1 treatment signal	GapmeR 2 treatment signal	Negative control gapmeR treatment signal	GapmeR 1 standard deviation	GapmeR 2 standard deviation	Negative control gapmeR standard deviation	GapmeR 1 vs negative control gapmeR fold change	GapmeR 1 vs negative control gapmeR fold change p-value	GapmeR 2 vs negative control gapmeR fold change	GapmeR 1 vs negative control gapmeR fold change p-value	Number of common PART1 mRNA targets	Common PART1 mRNA targets
20534340	MI0000061	hsa-let-7a-2	0.88	1.08	1.31	0.28	0.21	0.2	-1.35	0.424764	-1.17	0.441935	11	UGT2A1, LETM2, PRR15, SH3D19, AKR7L, DEFB132, BICC1, ZNF208, LRP1B, CACNB4, UGT2A1
20500114	MIMAT0010195	hsa-let-7a-2-3p	2.94	3.35	3.78	0.75	0.47	0.48	-1.8	0.755838	-1.35	0.72175	11	UGT2A1, LETM2, PRR15, SH3D19, AKR7L, DEFB132, BICC1, ZNF208, LRP1B, CACNB4, UGT2A1
20500116	MIMAT0004482	hsa-let-7b-3p	3.22	3.05	2.5	1.07	0.8	0.48	1.65	0.936118	1.47	0.479492	16	LRP1B, RASEF, ZNF208, SEMA3D, DEFB132, IFNE, HOXD10, AKR7L, LETM2, CACNB4, RAB19, HIST1H2BN, SUPT3H, TMCC3, CMC1, GPC6
20500714	MIMAT0004584	hsa-let-7g-3p	1.96	1.5	1.35	0.53	0.73	1	1.53	0.861471	1.12	0.708705	11	UGT2A1, LETM2, PRR15, SH3D19, AKR7L, DEFB132, BICC1, ZNF208, LRP1B, CACNB4, UGT2A1
20534398	MI0000108	hsa-mir-103a-2	0.93	1.42	0.79	0.09	0.21	0.08	1.1	0.384466	1.55	0.054078	14	PRR15, DEFB132, CT45A6, AKR7L, C6orf222, TMCC3, GDA, GPC6, IFNE, RASEF, CACNB4, PON3, SUPT3H, CMC1
20534399	MI0000108	hsa-mir-103a-2	1.18	1.82	1.18	0.09	0.21	0.18	1	0.779944	1.56	0.030205	14	PRR15, DEFB132, CT45A6, AKR7L, C6orf222, TMCC3, GDA, GPC6, IFNE, RASEF, CACNB4, PON3, SUPT3H, CMC1
20500190	MIMAT0009196	hsa-miR-103a-2-5p	1.76	2.52	2.42	0.58	0.77	0.88	-1.58	0.539489	1.07	0.620331	14	PRR15, DEFB132, CT45A6, AKR7L, C6orf222, TMCC3, GDA, GPC6, IFNE, RASEF, CACNB4, PON3, SUPT3H, CMC1
20500441	MIMAT0004556	hsa-miR-10b-3p	0.7	0.91	1.13	0.14	0.2	0.11	-1.35	0.067535	-1.16	0.735022	11	TEX13A, TMCC3, INO80C, SEMA3D, SH3D19, CACNB4, ZNF208, PCDHB13, CYP4F2, ARGFX, PON3
20506709	MIMAT0005823	hsa-miR-1178-3p	0.81	0.99	0.6	0.34	0.27	0.15	1.16	0.496625	1.31	0.376187	11	FSCN3, GDA, CYP4F2, TMCC3, GPC6, C6orf222, NKAIN1, GPRASP1, LRP1B, SLIT3, ARGFX
20504585	MIMAT0022838	hsa-miR-1185-1-3p	2.08	1.58	1.25	0.46	0.37	0.38	1.77	0.244284	1.25	0.025549	18	LETM2, GPRASP1, SEMA3D, LRP1B, HOXD10, RASEF, IFNE, TMCC3, AKR7L, ZNF208, HIST1H2BN, FSCN3, C6orf222, CACNB4, SUPT3H, SH3D19, GPC6, CMC1
20504576	MIMAT0022713	hsa-miR-1185-2-3p	1.58	1.24	1.15	0.57	0.27	0.39	1.35	0.462771	1.06	0.142408	18	LETM2, GPRASP1, SEMA3D, LRP1B, HOXD10, RASEF, IFNE, TMCC3, AKR7L, ZNF208, HIST1H2BN, FSCN3, C6orf222, CACNB4, SUPT3H, SH3D19, GPC6, CMC1
20506794	MIMAT0005863	hsa-miR-1200	0.9	0.7	1.13	0.19	0.47	0.25	-1.18	0.030194	-1.35	0.756526	11	C6orf222, TMCC3, CMC1, AKR7L, KRTAP10-11, RAB19, SLIT3, GPC6, GPRASP1, SH3D19, PON3
20535814	MI0006341	hsa-mir-1208	1.27	0.89	1.33	0.48	0.53	0.09	-1.04	0.885188	-1.36	0.843347	15	DEFB132, TMCC3, HIST1H2BN, SEMA3D, SH3D19, RASEF, GDA, BICC1, ITGAM, SLIT3, IFNE, SUPT3H, CMC1, ARGFX, GPC6
20504560	MIMAT0005459	hsa-miR-1224-3p	1.38	0.97	0.95	0.66	0.83	0.15	1.35	0.369366	1.02	0.349865	9	CYP4F2, CLDN7, GDA, ZNF208, CACNB4, IFNE, SLIT3, NKAIN1, RAB19
20506775	MIMAT0005583	hsa-miR-1228-3p	1.15	2.37	1.7	0.4	0.55	0.33	-1.46	0.190018	1.59	0.238475	10	C6orf222, GDA, NKAIN1, RAB19, TMCC3, SLIT3, ZNF208, IFNE, SH3D19, ARGFX
20506777	MIMAT0005584	hsa-miR-1229-3p	2.56	2.39	1.84	0.52	0.84	0.51	1.65	0.502248	1.47	0.47133	14	LETM2, HOXD10, NKAIN1, DEFB132, ZNF208, GBP7, AKR7L, C6orf222, IFNE, HIST1H2BN, SLIT3, SEMA3D, CMC1, ARGFX
20506779	MIMAT0005586	hsa-miR-1231	4.72	4.89	4.28	0.3	0.35	0.98	1.36	0.701126	1.53	0.685288	11	UGT2A1, UGT2A1, IFNE, GDA, C6orf222, ZNF208, SEMA3D, CACNB4, SH3D19, CMC1, ARGFX
20506790	MIMAT0005593	hsa-miR-1238-3p	1.76	1.33	2.83	0.18	0.63	0.64	-2.1	0.089032	-2.84	0.288267	11	AKR7L, SLIT3, SH3D19, LRP1B, SEMA3D, GDA, TMCC3, HIST1H2BN, RASEF, ZNF208, GPC6
20535862	MI0006383	hsa-mir-1248	0.87	1.53	1.09	0.69	0.28	0.1	-1.16	0.695241	1.36	0.205642	16	SLIT3, PRR15, DEFB132, GDA, TMCC3, SEMA3D, ZNF208, IFNE, SH3D19, RASEF, GPC6, NKAIN1, SUPT3H, CACNB4, CMC1, ARGFX
20506843	MIMAT0026740	hsa-miR-1250-3p	1.03	0.66	1.3	0.07	0.21	0.46	-1.2	0.43244	-1.56	0.289804	21	DEFB132, LETM2, INO80C, APOBEC3G, AC090616.2, GDA, ZNF208, CYP4F2, GPC6, IFNE, BICC1, SEMA3D, CACNB4, C6orf222, HIST1H2BN, HOXD10, LRP1B, CMC1, C8orf4, SH3D19, ARGFX
20506847	MIMAT0005905	hsa-miR-1254	5.04	5.12	4.72	0.14	1.03	0.5	1.25	0.357763	1.32	0.84148	9	KRTAP10-3, GPC6, CYP4A11, ITGAM, SLIT3, TMCC3, NKAIN1, RASEF, ARGFX
20506848	MIMAT0005906	hsa-miR-1255a	1.5	3.41	3.43	1.23	0.12	1.14	-3.82	0.53152	-1.02	0.476003	10	CLEC4M, ANXA9, BICC1, DEFB132, NKAIN1, CACNB4, SH3D19, RASEF, SLIT3, ARGFX
20500766	MIMAT0004602	hsa-miR-125a-3p	7.61	7.27	7.65	0.29	0.18	0.42	-1.03	0.418369	-1.3	0.621242	11	TMCC3, NKAIN1, HIST1H2BN, GPC6, IFNE, ZNF208, LRP1B, SUPT3H, SLIT3, CMC1, ARGFX
20506852	MIMAT0005911	hsa-miR-1260a	5.65	5.13	5.14	0.49	0.2	0.06	1.42	0.504964	-1	0.342871	13	CLDN7, GDA, ZNF208, CYP4F2, CACNB4, TEX13A, TRIM49, IFNE, AC090616.2, SEMA3D, RAB19, HIST1H2BN, RASEF
20535876	MI0006396	hsa-mir-1261	1.11	0.88	0.72	0.32	0.07	0.42	1.31	0.85736	1.12	0.749837	14	C8orf4, DEFB132, TRIM49, HIST1H2BN, IFNE, SH3D19, LRP1B, SLIT3, GDA, GPC6, ZNF208, TMCC3, SEMA3D, ARGFX
20504551	MIMAT0005791	hsa-miR-1264	1.19	0.89	0.69	0.22	0.14	0.03	1.41	0.055923	1.15	0.288056	13	GDA, RP11-41O4.1, PRR15, CACNB4, ZNF208, BICC1, GPC6, LRP1B, RASEF, SUPT3H, CMC1, ARGFX, PON3
20506862	MIMAT0005920	hsa-miR-1266-5p	1.42	0.81	1.41	0.19	0.37	0.99	1	0.320188	-1.51	0.303664	11	CT45A6, CLEC4M, NKAIN1, PRR15, KRTAP10-3, GPC6, AKR7L, SLIT3, ARGFX, CMC1, PON3
20518920	MIMAT0019059	hsa-miR-1269b	1.37	0.91	0.93	0.21	0.2	0.11	1.35	0.131093	-1.02	0.801888	9	RP11-41O4.1, CLDN7, GDA, HIST1H2BN, BICC1, CACNB4, PON3, CMC1, ARGFX
20529132	MIMAT0030415	hsa-miR-1273h-5p	1.76	0.82	2.02	0.63	0.41	0.43	-1.2	0.568249	-2.3	0.120547	12	CYP4A11, LRRC4B, GPC6, SLIT3, RAB19, C6orf222, TMCC3, HIST1H2BN, IFNE, ZNF208, SH3D19, ARGFX
20535895	MI0006415	hsa-mir-1275	1.09	1.48	1.08	0.22	0.23	0.09	1.01	0.988231	1.32	0.116368	12	PCDHB13, NKAIN1, CLEC4M, KLK5, CYP4A11, FSCN3, GPC6, TMCC3, ZNF208, SEMA3D, SLIT3, ARGFX
20506873	MIMAT0005930	hsa-miR-1276	0.93	1.48	1.37	0.11	0.3	0.55	-1.36	0.18726	1.08	0.715314	11	HOXD10, SEMA3D, TRIM49, RASEF, BICC1, LRP1B, GDA, TMCC3, DEFB132, CMC1, SH3D19
20506876	MIMAT0022724	hsa-miR-1277-5p	0.85	1.09	1.27	0.17	0.11	0.27	-1.33	0.248689	-1.13	0.28608	27	IFNE, UGT2A1, LETM2, HOXD10, GPRASP1, UGT2A1, SEMA3D, CACNB4, SUPT3H, SLIT3, AC090616.2, RASEF, CYP4F2, TRIM49, GDA, GPC6, LRP1B, TMCC3, CYP4A11, ZNF208, BICC1, HIST1H2BN, SH3D19, CMC1, C8orf4, PON3, ARGFX
20506885	MIMAT0026743	hsa-miR-1288-5p	1.06	0.81	1.25	0.34	0.12	0.23	-1.14	0.527622	-1.35	0.368654	10	ANXA9, HOXD10, RASEF, SLIT3, ZNF208, IFNE, RAB19, CMC1, SUPT3H, PON3
20535836	MI0006359	hsa-mir-1299	1.81	1.33	2.28	0.47	0.67	1.11	-1.38	0.580677	-1.93	0.148657	15	CYP4F2, RASEF, UGT2A1, FSCN3, TMCC3, UGT2A1, ITGAM, SLIT3, AKR7L, GPC6, CT45A6, CYP4A11, ZNF208, RAB19, CMC1
20504571	MIMAT0026639	hsa-miR-1301-5p	1.02	1.26	1.56	0.5	0.37	0.12	-1.45	0.443999	-1.23	0.734712	11	AC090616.2, GDA, HOXD10, C6orf222, PCDHB13, SH3D19, NKAIN1, RAB19, LRP1B, SUPT3H, CMC1
20506827	MIMAT0005890	hsa-miR-1302	1.2	1.23	0.85	0.17	0.18	0.2	1.28	0.111839	1.3	0.204256	10	C6orf222, HIST1H2BN, TMCC3, BICC1, CACNB4, SEMA3D, SLIT3, C8orf4, CMC1, PON3
20506828	MIMAT0005891	hsa-miR-1303	5.1	4.81	5.54	0.2	0.23	0.33	-1.36	0.373699	-1.66	0.135421	9	C6orf222, BICC1, NKAIN1, IFNE, APOBEC3G, TMCC3, SEMA3D, C8orf4, PON3
20501180	MIMAT0004680	hsa-miR-130b-5p	3.16	3.79	3.83	0.18	0.55	1.16	-1.59	0.958628	-1.02	0.278445	12	GPC6, GDA, RASEF, SEMA3D, ZNF208, NKAIN1, HIST1H2BN, TMCC3, CACNB4, SLIT3, CMC1, PON3
20519495	MIMAT0019776	hsa-miR-1343-3p	1.49	1.16	1.88	0.25	0.26	0.82	-1.31	0.247922	-1.65	0.19106	16	TRIM49, FSCN3, LETM2, C6orf222, CYP4A11, AC090616.2, CACNB4, RASEF, SEMA3D, LRRC4B, NKAIN1, SLIT3, IFNE, ITGAM, CMC1, PON3
20519494	MIMAT0027038	hsa-miR-1343-5p	6.18	6.35	6.63	0.24	0.22	0.78	-1.37	0.933501	-1.22	0.710195	11	AC090616.2, GPC6, KRTAP10-11, GDA, AKR7L, TMCC3, SH3D19, LETM2, CACNB4, SLIT3, RASEF
20534596	MI0000455	hsa-mir-138-2	1.34	0.96	0.95	0.33	0.23	0.12	1.31	0.27506	1	0.91505	16	TEX13A, HIST1H2BN, SLIT3, IFNE, C8orf4, ZNF208, BICC1, SEMA3D, RASEF, DEFB132, PCDHB13, CACNB4, SUPT3H, CMC1, ARGFX, SH3D19
20534597	MI0000455	hsa-mir-138-2	1.32	1	0.76	0.27	0.15	0.18	1.48	0.26585	1.18	0.410301	16	TEX13A, HIST1H2BN, SLIT3, IFNE, C8orf4, ZNF208, BICC1, SEMA3D, RASEF, DEFB132, PCDHB13, CACNB4, SUPT3H, CMC1, ARGFX, SH3D19
20500433	MIMAT0004552	hsa-miR-139-3p	1.69	1.4	1.82	0.11	0.4	0.51	-1.09	0.78849	-1.34	0.838284	9	UGT2A1, UGT2A1, BICC1, AKR7L, NKAIN1, RAB19, ZNF208, HIST1H2BN, ARGFX
20500751	MIMAT0004599	hsa-miR-143-5p	2.51	3.87	3.11	0.95	0.86	0.96	-1.52	0.411349	1.69	0.007854	10	LRP1B, KRTAP10-3, ZNF208, HIST1H2BN, SH3D19, LETM2, IFNE, AKR7L, SUPT3H, ARGFX
20500779	MIMAT0004608	hsa-miR-146a-3p	1.44	0.75	0.91	0.4	0.13	0.36	1.44	0.460034	-1.12	0.451211	12	DEFB132, GDA, CLEC4M, ZNF208, LETM2, NKAIN1, TMCC3, HIST1H2BN, BICC1, GPRASP1, SH3D19, GPC6
20534506	MI0000262	hsa-mir-147a	1.35	1.09	0.85	0.14	0.18	0.49	1.41	0.447732	1.18	0.884506	10	ITGAM, ZNF208, SEMA3D, HIST1H2BN, NKAIN1, SLIT3, PCDHB13, LRP1B, IFNE, CMC1
20534507	MI0000262	hsa-mir-147a	1.21	0.97	0.95	0.08	0.14	0.4	1.2	0.93239	1.01	0.682103	10	ITGAM, ZNF208, SEMA3D, HIST1H2BN, NKAIN1, SLIT3, PCDHB13, LRP1B, IFNE, CMC1
20501290	MIMAT0004699	hsa-miR-148b-5p	1.48	1.16	1.1	0.56	0.4	0.12	1.3	0.745382	1.04	0.918768	16	RP11-41O4.1, DEFB132, C8orf4, GDA, CLEC4M, HIST1H2BN, TMCC3, FSCN3, RASEF, SEMA3D, SH3D19, SLIT3, ZNF208, CACNB4, CMC1, ARGFX
20500197	MIMAT0004518	hsa-miR-16-2-3p	0.77	2.21	1.81	0.3	0.91	0.55	-2.06	0.150634	1.32	0.459755	14	HIST1H2BN, PCDHB13, GDA, LETM2, ZNF208, IFNE, SH3D19, TMCC3, GPRASP1, RASEF, SLIT3, GPC6, LRP1B, CMC1
20500451	MIMAT0000260	hsa-miR-182-3p	0.75	1.32	0.77	0.12	0.15	0.28	-1.02	0.335443	1.46	0.309797	10	TEX13A, LETM2, SEMA3D, SH3D19, RASEF, IFNE, ZNF208, RAB19, CACNB4, CMC1
20500790	MIMAT0004612	hsa-miR-186-3p	0.86	1.12	0.64	0.39	0.17	0.16	1.17	0.4432	1.4	0.000124	13	LETM2, HOXD10, SEMA3D, ZNF208, IFNE, RASEF, HIST1H2BN, BICC1, RAB19, CACNB4, GPRASP1, SH3D19, ARGFX
20509227	MIMAT0007883	hsa-miR-1909-3p	4.58	4.94	4.43	0.39	0.54	1.29	1.11	0.532301	1.42	0.464455	11	IFNA1, PGLYRP3, SH3D19, CACNB4, CLDN7, GDA, SLIT3, C8orf4, GPC6, NKAIN1, ZNF208
20500794	MIMAT0026482	hsa-miR-190a-3p	1.02	1.5	0.96	0.11	0.28	0.29	1.04	0.967762	1.45	0.263765	20	HOXD10, UGT2A1, CACNB4, IFNE, UGT2A1, SEMA3D, GPC6, GPRASP1, TAS2R30, HIST1H2BN, LRP1B, DEFB132, SH3D19, ZNF208, SLIT3, AC090616.2, BICC1, RASEF, SUPT3H, ARGFX
20509229	MIMAT0026917	hsa-miR-1910-3p	3.47	3.14	2.72	0.42	0.17	0.84	1.69	0.198553	1.33	0.465928	16	CYP4A11, HIST1H2BN, PRR15, ANXA9, GPC6, SLIT3, CACNB4, IFNE, ZNF208, SEMA3D, RAB19, SUPT3H, C6orf222, SH3D19, ARGFX, PON3
20510801	MIMAT0009451	hsa-miR-1976	1	1	1.44	0.8	0.62	0.26	-1.36	0.823665	-1.36	0.988291	17	NKAIN1, LETM2, TEX13A, DEFB132, FSCN3, HIST1H2BN, IFNE, CACNB4, BICC1, GPC6, C6orf222, LRRC4B, TMCC3, SLIT3, CMC1, SH3D19, ARGFX
20500136	MIMAT0004491	hsa-miR-19b-1-5p	1.56	1.2	1.03	0.45	0.36	0.91	1.44	0.994361	1.13	0.444328	14	ZNF208, FSCN3, CACNB4, DEFB132, GPC6, SEMA3D, HIST1H2BN, RAB19, IFNE, NKAIN1, C8orf4, ARGFX, CMC1, SH3D19
20501162	MIMAT0001620	hsa-miR-200a-5p	1.54	0.99	0.99	0.44	0.24	0.18	1.46	0.129568	1	0.74309	12	C8orf4, ZNF208, RASEF, IFNE, GDA, SH3D19, SLIT3, TMCC3, CACNB4, SEMA3D, CMC1, ARGFX
20500461	MIMAT0022693	hsa-miR-204-3p	1.83	1.8	2.5	0.75	0.73	0.56	-1.6	0.60028	-1.62	0.659605	12	KLK5, LETM2, BICC1, DEFB132, SLIT3, RASEF, SEMA3D, LRP1B, IFNE, SUPT3H, ARGFX, CMC1
20500467	MIMAT0022694	hsa-miR-211-3p	0.96	1.16	1.39	0.36	0.5	0.18	-1.34	0.226452	-1.17	0.584816	10	RASEF, NKAIN1, CLDN7, C8orf4, CYP4A11, SLIT3, SH3D19, LRRC4B, HIST1H2BN, ARGFX
20511560	MIMAT0011160	hsa-miR-2116-5p	2.12	2.37	1.99	0.36	0.05	0.49	1.09	0.160774	1.3	0.125268	14	SEMA3D, TAS2R30, ZNF208, DEFB132, FSCN3, LETM2, BICC1, RASEF, LRP1B, IFNE, CACNB4, SUPT3H, CMC1, PON3
20536029	MI0010636	hsa-mir-2117	0.93	1.14	0.71	0.22	0.27	0.17	1.16	0.338525	1.34	0.017075	11	DEFB132, GDA, ZNF208, GPC6, C8orf4, HIST1H2BN, IFNE, GPRASP1, NKAIN1, CACNB4, PON3
20500472	MIMAT0000271	hsa-miR-214-3p	2.44	2.49	1.8	0.33	0.24	0.36	1.55	0.219389	1.61	0.048607	19	INO80C, KRTAP10-11, RASEF, UGT2A1, C6orf222, PGLYRP3, CYP4A11, KLK5, SEMA3D, HIST1H2BN, LRP1B, GPC6, IFNE, SLIT3, RAB19, ITGAM, ZNF208, UGT2A1, PON3
20500482	MIMAT0004567	hsa-miR-219a-1-3p	1.8	1.59	1.09	0.57	0.14	0.31	1.63	0.076642	1.41	0.218155	15	GPC6, AKR7L, C8orf4, ZNF208, DEFB132, TMCC3, BICC1, NKAIN1, C6orf222, LRP1B, GDA, HIST1H2BN, IFNE, SLIT3, CMC1
20500143	MIMAT0004495	hsa-miR-22-5p	6.44	6.29	6.81	0.11	0.32	0.37	-1.29	0.53048	-1.44	0.00832	13	TAS2R30, FSCN3, DEFB132, ZNF208, KRTAP10-11, SEMA3D, LRP1B, RASEF, BICC1, IFNE, CMC1, SUPT3H, PON3
20500485	MIMAT0004569	hsa-miR-222-5p	3.66	2.69	3.11	0.68	0.26	0.43	1.46	0.376442	-1.34	0.650166	16	UGT2A1, RASEF, C8orf4, UGT2A1, LRRC4B, CYP4F2, C6orf222, SEMA3D, HIST1H2BN, CACNB4, RAB19, ZNF208, AC090616.2, IFNE, CMC1, PON3
20500490	MIMAT0009198	hsa-miR-224-3p	7.26	7.03	7.43	0.16	0.18	0.35	-1.12	0.800192	-1.32	0.615957	15	GPC6, IFNE, HIST1H2BN, SEMA3D, LETM2, LRP1B, ZNF208, GDA, C6orf222, CACNB4, SUPT3H, CMC1, ARGFX, SH3D19, PON3
20512260	MIMAT0011775	hsa-miR-2276-3p	2.16	2.97	1.75	0.19	0.7	0.8	1.33	0.946653	2.33	0.389175	14	GPC6, KRTAP10-3, CACNB4, CLEC4M, CLDN7, IFNE, HIST1H2BN, AC090616.2, RASEF, TMCC3, ZNF208, SUPT3H, SH3D19, CMC1
20512262	MIMAT0011777	hsa-miR-2277-3p	1.82	2.6	2.54	0.84	0.55	0.42	-1.64	0.689762	1.04	0.489282	9	INO80C, BICC1, CACNB4, HIST1H2BN, LRP1B, IFNE, SLIT3, ZNF208, PON3
20517724	MIMAT0017950	hsa-miR-2355-3p	1.82	1.31	1.24	0.54	0.68	0.21	1.49	0.345613	1.05	0.467383	13	GBP7, TRIM49, GDA, DEFB132, CLDN7, GPC6, SEMA3D, C6orf222, IFNE, HIST1H2BN, TMCC3, CMC1, ARGFX
20513193	MIMAT0013517	hsa-miR-2682-5p	1.29	0.77	1.24	0.25	0.36	0.21	1.04	0.593624	-1.38	0.538253	13	PRR15, AKR7L, TMCC3, SEMA3D, HIST1H2BN, GDA, IFNE, NKAIN1, SLIT3, ZNF208, ITGAM, ARGFX, PON3
20500155	MIMAT0004500	hsa-miR-26b-3p	1.62	2.62	1.31	0.34	0.66	0.52	1.24	0.936752	2.48	0.413006	13	SEMA3D, BICC1, C8orf4, UGT2A1, CYP4F2, GPC6, IFNE, DEFB132, SUPT3H, CACNB4, CMC1, ARGFX, UGT2A1
20534394	MI0000105	hsa-mir-29b-1	1.07	1.14	1.17	0.26	0.37	0.34	-1.07	0.697654	-1.02	0.810096	10	DEFB132, TMCC3, SEMA3D, IFNE, RAB19, PCDHB13, GDA, CACNB4, PON3, CMC1
20534395	MI0000105	hsa-mir-29b-1	1.16	1.03	1.59	0.42	0.51	0.5	-1.35	0.652763	-1.47	0.974629	10	DEFB132, TMCC3, SEMA3D, IFNE, RAB19, PCDHB13, GDA, CACNB4, PON3, CMC1
20500189	MIMAT0004515	hsa-miR-29b-2-5p	2.71	2.51	1.92	0.77	0.71	0.46	1.73	0.047808	1.51	0.12678	12	RAB19, ZNF208, GPC6, LETM2, CACNB4, IFNE, GDA, SEMA3D, DEFB132, SUPT3H, CMC1, ARGFX
20515572	MIMAT0015027	hsa-miR-3074-3p	2.46	2.58	1.54	0.8	0.61	0.27	1.89	0.538758	2.06	0.090397	9	C8orf4, CACNB4, RASEF, C6orf222, ITGAM, SEMA3D, HIST1H2BN, LRP1B, SUPT3H
20500725	MIMAT0004589	hsa-miR-30b-3p	6.81	6.59	7.03	0.18	0.04	0.39	-1.16	0.50575	-1.36	0.472359	12	CYP4A11, LRRC4B, GPC6, SLIT3, RAB19, C6orf222, TMCC3, HIST1H2BN, IFNE, ZNF208, SH3D19, ARGFX
20501161	MIMAT0004674	hsa-miR-30c-1-3p	3.53	3.48	4.41	0.86	0.62	0.89	-1.84	0.994919	-1.9	0.753006	19	UGT2A1, UGT2A1, CYP4A11, KRTAP10-3, AKR7L, RAB19, SLIT3, NKAIN1, TMCC3, LRRC4B, GPC6, ZNF208, IFNE, C6orf222, HIST1H2BN, SUPT3H, SH3D19, ARGFX, PON3
20534499	MI0000254	hsa-mir-30c-2	1.93	1.97	1.54	0.23	0.04	0.22	1.3	0.236671	1.34	0.059639	19	UGT2A1, UGT2A1, CYP4A11, KRTAP10-3, AKR7L, RAB19, SLIT3, NKAIN1, TMCC3, LRRC4B, GPC6, ZNF208, IFNE, C6orf222, HIST1H2BN, SUPT3H, SH3D19, ARGFX, PON3
20515517	MIMAT0014983	hsa-miR-3121-3p	1.09	1.56	0.95	0.07	0.25	0.24	1.11	0.444969	1.53	0.069673	16	TAS2R30, IFNA1, UGT2A1, UGT2A1, LETM2, GPC6, TRIM49, ZNF208, CACNB4, HIST1H2BN, RASEF, GDA, LRP1B, SUPT3H, C8orf4, CMC1
20515521	MIMAT0019200	hsa-miR-3124-3p	0.65	0.88	1.17	0.34	0.12	0.47	-1.43	0.451058	-1.23	0.577703	13	FSCN3, SEMA3D, SLIT3, INO80C, GDA, ZNF208, SUPT3H, C8orf4, RASEF, GPRASP1, RAB19, NKAIN1, ARGFX
20515523	MIMAT0014988	hsa-miR-3125	1.32	1.03	0.76	0.69	0.23	0.27	1.47	0.130775	1.2	0.115823	10	DEFB132, TRIM49, NKAIN1, GPC6, IFNE, HIST1H2BN, AC090616.2, SLIT3, LRP1B, SH3D19
20515531	MIMAT0014995	hsa-miR-3130-5p	3.63	3.68	4.04	0.16	0.44	0.35	-1.33	0.101647	-1.28	0.146461	11	TAS2R30, NKAIN1, CACNB4, AKR7L, CLDN7, TMCC3, RAB19, IFNE, SUPT3H, CMC1, PON3
20515535	MIMAT0014998	hsa-miR-3133	0.82	1.59	1.11	0.15	0.47	0.09	-1.22	0.017664	1.4	0.577448	23	TRIM49, PCDHB13, CT45A6, C6orf222, TMCC3, SLIT3, CACNB4, GPC6, ANXA9, GDA, SH3D19, RAB19, IFNE, SEMA3D, SUPT3H, PON3, RASEF, LRP1B, HIST1H2BN, AC090616.2, CMC1, C8orf4, ARGFX
20536235	MI0014167	hsa-mir-3143	1.41	1.61	1.81	0.08	0.23	0.48	-1.33	0.679117	-1.15	0.702384	19	PRR15, CACNB4, TRIM49, GBP7, SUPT3H, BICC1, GDA, GPRASP1, C8orf4, HIST1H2BN, DEFB132, LRP1B, SH3D19, GPC6, SLIT3, IFNE, SEMA3D, C6orf222, CMC1
20536243	MI0014176	hsa-mir-3149	0.93	1.23	0.67	0.22	0.28	0.35	1.2	0.876587	1.48	0.417091	19	RP11-41O4.1, SUPT3H, C8orf4, DEFB132, LETM2, CYP4F2, IFNE, ZNF208, BICC1, NKAIN1, SEMA3D, HIST1H2BN, CLEC4M, GPC6, CACNB4, LRP1B, CMC1, ARGFX, SH3D19
20536248	MI0014180	hsa-mir-3153	1.35	1.39	1.86	0.08	0.59	0.27	-1.42	0.144116	-1.38	0.622027	18	HOXD10, ANXA9, SH3D19, CT45A6, BICC1, CACNB4, HIST1H2BN, SLIT3, SEMA3D, NKAIN1, GPC6, TMCC3, IFNE, SUPT3H, LRRC4B, CMC1, C8orf4, PON3
20515570	MIMAT0015026	hsa-miR-3153	1.44	0.83	0.88	0.46	0.31	0.2	1.47	0.116499	-1.04	0.421938	18	HOXD10, ANXA9, SH3D19, CT45A6, BICC1, CACNB4, HIST1H2BN, SLIT3, SEMA3D, NKAIN1, GPC6, TMCC3, IFNE, SUPT3H, LRRC4B, CMC1, C8orf4, PON3
20515573	MIMAT0015028	hsa-miR-3154	1.64	1.58	2.15	0.35	0.61	0.35	-1.42	0.004986	-1.48	0.386255	12	CYP4A11, GPRASP1, KLK5, TRIM49, KRTAP10-11, CACNB4, C6orf222, GPC6, SLIT3, SUPT3H, CMC1, PON3
20515575	MIMAT0015030	hsa-miR-3156-5p	1.09	1.24	2.21	0.24	0.31	0.36	-2.17	0.055908	-1.95	0.000951	13	APOBEC3G, RP11-41O4.1, BICC1, NKAIN1, ZNF208, TMCC3, GDA, IFNE, C6orf222, SUPT3H, SEMA3D, SH3D19, GPC6
20515579	MIMAT0019211	hsa-miR-3158-5p	1.51	1.16	1.59	0.38	0.87	0.32	-1.06	0.955559	-1.35	0.72023	13	GPC6, KLK5, TMCC3, LETM2, NKAIN1, CT45A6, AKR7L, ZNF208, IFNE, HIST1H2BN, C6orf222, CMC1, PON3
20515581	MIMAT0015033	hsa-miR-3159	0.76	0.72	1.12	0.3	0.1	0.07	-1.29	0.429601	-1.32	0.013878	10	ZNF208, SH3D19, DEFB132, TMCC3, GDA, IFNE, SEMA3D, RAB19, CACNB4, CMC1
20515583	MIMAT0015034	hsa-miR-3160-3p	0.89	1.05	1.3	0.04	0.21	0.25	-1.33	0.083605	-1.19	0.284925	10	TMCC3, CT45A6, PRR15, SH3D19, RAB19, GPRASP1, SUPT3H, CMC1, ARGFX, RP11-41O4.1
20515585	MIMAT0015036	hsa-miR-3162-5p	4.16	5.05	5.06	0.15	0.37	0.06	-1.87	0.005302	-1.01	0.894009	12	GDA, GPC6, DEFB132, CYP4A11, PCDHB13, RAB19, ZNF208, IFNE, AC090616.2, SUPT3H, CMC1, PON3
20536270	MI0014193	hsa-mir-3163	1.54	1.08	1.11	0.13	0.28	0.13	1.35	0.191527	-1.02	0.450756	31	CMC1, TAS2R30, AC090616.2, CACNB4, SEMA3D, RP11-41O4.1, PRR15, HIST1H2BN, GDA, C8orf4, UGT2A1, LRP1B, RASEF, PCDHB13, BICC1, CYP4F2, LETM2, GPC6, GLYATL2, TRIM49, ZNF208, SLIT3, SH3D19, IFNE, DEFB132, NKAIN1, ITGAM, SUPT3H, UGT2A1, ARGFX, PON3
20536272	MI0014195	hsa-mir-3165	1.39	0.89	0.89	0.44	0.1	0.19	1.41	0.189004	1	0.735543	12	KRTAP10-11, DEFB132, PRR15, NKAIN1, GDA, RAB19, TMCC3, HIST1H2BN, CACNB4, SUPT3H, SH3D19, ARGFX
20515603	MIMAT0015052	hsa-miR-3175	4.23	4.57	4.62	0.51	0.74	0.58	-1.31	0.83142	-1.04	0.849638	14	SLIT3, GDA, CACNB4, AC090616.2, AKR7L, KRTAP10-11, SH3D19, NKAIN1, TMCC3, LETM2, HIST1H2BN, RASEF, RAB19, PON3
20536287	MI0014210	hsa-mir-3176	1.65	1.5	1.19	0.31	0.03	0.2	1.38	0.131652	1.24	0.139727	11	LETM2, GPC6, TEX13A, ANXA9, NKAIN1, HOXD10, TMCC3, SLIT3, GDA, SH3D19, ARGFX
20515604	MIMAT0015053	hsa-miR-3176	1.85	1.54	1.36	0.54	0.66	0.41	1.41	0.746398	1.13	0.643057	11	LETM2, GPC6, TEX13A, ANXA9, NKAIN1, HOXD10, TMCC3, SLIT3, GDA, SH3D19, ARGFX
20515609	MIMAT0015057	hsa-miR-3180-5p	0.95	0.95	1.42	0.26	0.7	0.24	-1.38	0.291418	-1.38	0.964271	16	PRR15, HOXD10, C8orf4, RASEF, BICC1, GDA, CACNB4, TMCC3, SLIT3, ZNF208, RAB19, HIST1H2BN, CYP4A11, DEFB132, IFNE, SUPT3H
20536301	MI0014227	hsa-mir-3185	1.29	1.67	1.87	0.59	0.32	0.5	-1.49	0.618069	-1.14	0.496723	18	CACNB4, APOBEC3G, IFNE, CYP4A11, SH3D19, C6orf222, CLEC4M, UGT2A1, RASEF, AC090616.2, ZNF208, BICC1, SEMA3D, GPRASP1, PCDHB13, UGT2A1, ARGFX, CMC1
20515623	MIMAT0015069	hsa-miR-3187-3p	3.17	3.53	2.77	1.18	0.46	0.68	1.32	0.693595	1.68	0.439138	9	GPC6, NKAIN1, ZNF208, BICC1, TMCC3, SLIT3, IFNE, HIST1H2BN, ARGFX
20515622	MIMAT0019216	hsa-miR-3187-5p	1.57	1.1	1.53	0.54	0.31	0.27	1.03	0.698412	-1.35	0.211949	13	NKAIN1, SLIT3, RP11-41O4.1, ITGAM, TMCC3, C6orf222, RASEF, RAB19, GDA, SUPT3H, SH3D19, ARGFX, PON3
20515624	MIMAT0015070	hsa-miR-3188	2.15	3.02	1.77	0.95	0.23	0.48	1.3	0.38567	2.37	0.016828	9	APOBEC3G, NKAIN1, RP11-41O4.1, ZNF208, CLEC4M, SLIT3, SH3D19, SUPT3H, CMC1
20515628	MIMAT0015073	hsa-miR-3190-5p	1.5	1.05	1.05	0.6	0.23	0.24	1.36	0.869275	-1	0.099739	13	LETM2, ANXA9, NKAIN1, KRTAP10-3, DEFB132, TMCC3, HIST1H2BN, RAB19, GDA, SLIT3, ITGAM, SH3D19, ARGFX
20515630	MIMAT0022732	hsa-miR-3191-5p	1.32	1.14	0.91	0.36	0.27	0.11	1.33	0.497299	1.17	0.382177	17	CLEC4M, KLK5, DEFB132, LETM2, SEMA3D, NKAIN1, GPC6, SLIT3, HIST1H2BN, IFNE, ZNF208, GPRASP1, TMCC3, SUPT3H, PON3, CACNB4, CMC1
20515633	MIMAT0027027	hsa-miR-3192-3p	1.3	0.98	1.52	0.24	0.63	0.23	-1.17	0.006749	-1.46	0.68526	14	CT45A6, C6orf222, RP11-41O4.1, RASEF, SH3D19, SLIT3, RAB19, ZNF208, SEMA3D, IFNE, GDA, CMC1, SUPT3H, ARGFX
20515635	MIMAT0015078	hsa-miR-3194-5p	1.51	1.99	1.34	0.25	0.58	0.03	1.13	0.439602	1.58	0.206601	10	NKAIN1, PLCH1, C6orf222, IFNE, SLIT3, HIST1H2BN, AC090616.2, GDA, CACNB4, ARGFX
20515644	MIMAT0017392	hsa-miR-3200-5p	4.87	4.12	4.43	0.49	0.13	0.17	1.36	0.883512	-1.24	0.012363	11	GDA, SH3D19, GPRASP1, C6orf222, RASEF, CACNB4, SLIT3, ZNF208, ITGAM, NKAIN1, CMC1
20501283	MIMAT0004696	hsa-miR-323a-5p	2.58	1.26	1.13	1.01	0.19	0.34	2.73	0.441236	1.09	0.940085	9	APOBEC3G, NKAIN1, IFNE, HIST1H2BN, SUPT3H, SLIT3, SH3D19, ARGFX, GPC6
20502444	MIMAT0026555	hsa-miR-329-5p	0.82	0.82	1.27	0.11	0.12	0.19	-1.36	0.028205	-1.36	0.195503	15	AKR7L, SH3D19, APOBEC3G, C8orf4, TEX13A, LETM2, HOXD10, CACNB4, ZNF208, C6orf222, GPC6, SLIT3, PCDHB13, SUPT3H, CMC1
20501292	MIMAT0004700	hsa-miR-331-5p	4.44	4.42	4.97	0.83	0.23	0.62	-1.45	0.793919	-1.47	0.653263	9	TAS2R30, GPC6, UGT2A1, ZNF208, CACNB4, GPRASP1, SH3D19, CMC1, UGT2A1
20501282	MIMAT0000754	hsa-miR-337-3p	1.79	1.73	2.26	0.09	0.54	0.29	-1.38	0.134907	-1.44	0.349023	10	CACNB4, SEMA3D, SLIT3, GDA, BICC1, ZNF208, C8orf4, SH3D19, ARGFX, PON3
20500169	MIMAT0004506	hsa-miR-33a-3p	1.68	1.38	1.9	0.35	0.34	0.62	-1.16	0.558671	-1.43	0.432995	18	GLYATL2, DEFB132, CYP4F2, C8orf4, TAS2R30, CACNB4, ZNF208, TMCC3, GDA, RASEF, GPC6, SEMA3D, SLIT3, BICC1, IFNE, CMC1, ARGFX, PON3
20501313	MIMAT0022698	hsa-miR-345-3p	3.28	4.1	3.83	0.63	0.22	0.73	-1.46	0.727809	1.21	0.747429	9	UGT2A1, TMCC3, LETM2, CLDN7, SLIT3, ZNF208, SUPT3H, UGT2A1, PON3
20501312	MIMAT0000772	hsa-miR-345-5p	8.8	8.54	8.4	0.27	0.16	0.38	1.32	0.141372	1.1	0.71041	9	KRTAP10-11, RP11-41O4.1, C6orf222, HIST1H2BN, GPRASP1, RASEF, CACNB4, PON3, CMC1
20519599	MIMAT0019877	hsa-miR-3591-3p	1.31	1.5	1.06	0.15	0.36	0.59	1.18	0.956802	1.35	0.694906	11	TMCC3, LETM2, RASEF, NKAIN1, C6orf222, CACNB4, HIST1H2BN, GDA, CYP4A11, CMC1, SH3D19
20519598	MIMAT0019876	hsa-miR-3591-5p	1.11	1.45	0.87	0.26	0.4	0.17	1.18	0.911597	1.49	0.505074	15	FSCN3, AKR7L, CYP4F2, RASEF, BICC1, ZNF208, DEFB132, TMCC3, GPRASP1, AC090616.2, LRP1B, GPC6, SLIT3, SH3D19, CMC1
20517810	MIMAT0017981	hsa-miR-3605-5p	2.79	2.48	1.92	0.22	0.14	0.59	1.83	0.255684	1.48	0.532185	10	KLK5, HIST1H2BN, ZNF208, RASEF, CACNB4, GDA, IFNE, LRP1B, CMC1, GPC6
20517813	MIMAT0022965	hsa-miR-3606-3p	1.08	0.82	0.64	0.21	0.22	0.32	1.35	0.495027	1.13	0.917606	22	LETM2, CT45A6, GDA, CACNB4, RASEF, APOBEC3G, GPC6, SEMA3D, SLIT3, BICC1, SUPT3H, CYP4F2, ZNF208, C6orf222, HIST1H2BN, KLK5, IFNE, C8orf4, CMC1, ARGFX, SH3D19, PON3
20517815	MIMAT0017985	hsa-miR-3607-3p	0.77	0.84	1.19	0.38	0.36	0.17	-1.33	0.584736	-1.27	0.170899	15	GDA, TMCC3, C8orf4, GLYATL2, LETM2, NKAIN1, IFNE, SEMA3D, GPC6, LRP1B, SUPT3H, SLIT3, GPRASP1, CMC1, ARGFX
20501198	MIMAT0004682	hsa-miR-361-3p	4.79	4.85	4.31	0.93	0.74	0.34	1.39	0.636511	1.45	0.837231	10	C6orf222, CACNB4, NKAIN1, PRR15, GPC6, TMCC3, SLIT3, ARGFX, CMC1, PON3
20517821	MIMAT0017991	hsa-miR-3613-3p	3.28	4.1	3.92	1.28	0.64	1.15	-1.56	0.398808	1.13	0.94918	25	RAB19, TRIM49, SH3D19, TMCC3, LRP1B, LETM2, NKAIN1, ZNF208, RASEF, DEFB132, SLIT3, C6orf222, GDA, LRRC4B, ITGAM, HIST1H2BN, GPC6, CACNB4, IFNE, PCDHB13, GPRASP1, SUPT3H, CMC1, ARGFX, PON3
20517820	MIMAT0017990	hsa-miR-3613-5p	4.64	5.08	5.79	1.21	0.69	0.34	-2.23	0.132762	-1.63	0.549471	10	HOXD10, AKR7L, LETM2, SH3D19, LRP1B, IFNE, GPRASP1, RASEF, SEMA3D, PON3
20517830	MIMAT0017999	hsa-miR-3619-5p	3.49	3.47	3.91	0.3	0.71	0.35	-1.34	0.484336	-1.36	0.400119	19	INO80C, KRTAP10-11, RASEF, UGT2A1, C6orf222, PGLYRP3, CYP4A11, KLK5, SEMA3D, HIST1H2BN, LRP1B, GPC6, IFNE, SLIT3, RAB19, ITGAM, ZNF208, UGT2A1, PON3
20517838	MIMAT0018005	hsa-miR-3622b-5p	0.83	1.31	1.3	0.36	0.88	0.24	-1.39	0.515412	1.01	0.532369	13	PCDHB13, PTH2, GPC6, SLIT3, RAB19, GDA, TMCC3, IFNE, ZNF208, SUPT3H, HIST1H2BN, CACNB4, ARGFX
20501205	MIMAT0003385	hsa-miR-363-5p	0.69	0.91	1.11	0.61	0.13	0.21	-1.34	0.925264	-1.14	0.755547	15	NKAIN1, CYP4A11, SMR3A, GDA, CLEC4M, TMCC3, LRRC4B, C6orf222, LETM2, SLIT3, ZNF208, RAB19, SEMA3D, SH3D19, CMC1
20517898	MIMAT0018065	hsa-miR-3646	2.43	2.67	3.51	0.35	0.76	1.06	-2.12	0.389069	-1.79	0.928438	24	INO80C, ARGFX, GBP7, TRIM49, GPC6, TAS2R30, RASEF, DEFB132, LETM2, SEMA3D, CMC1, TMCC3, SH3D19, CACNB4, ITGAM, LRP1B, SLIT3, GDA, HOXD10, HIST1H2BN, IFNE, NKAIN1, SUPT3H, PCDHB13
20517903	MIMAT0018072	hsa-miR-3652	2.28	1.57	1.4	0.92	0.54	0.45	1.84	0.48918	1.12	0.717049	15	KRTAP10-3, PGLYRP3, NKAIN1, CACNB4, KLK5, LRRC4B, AKR7L, LETM2, SLIT3, IFNE, SUPT3H, HIST1H2BN, SH3D19, ARGFX, CMC1
20517909	MIMAT0018078	hsa-miR-3658	1.03	0.69	1.1	0.19	0.14	0.1	-1.05	0.253673	-1.33	0.0229	18	GLYATL2, LETM2, PCDHB13, GPC6, PRR15, GDA, RASEF, CACNB4, AC090616.2, HIST1H2BN, SEMA3D, ZNF208, NKAIN1, TMCC3, SH3D19, CMC1, C8orf4, ARGFX
20501209	MIMAT0009199	hsa-miR-365a-5p	5.35	5.1	4.83	0.12	0.35	0.25	1.44	0.143283	1.21	0.713693	12	KLK5, TMCC3, HIST1H2BN, GPC6, LETM2, IFNE, AKR7L, NKAIN1, RASEF, SUPT3H, SH3D19, ARGFX
20501213	MIMAT0022833	hsa-miR-365b-5p	2.44	3.78	3.59	0.71	0.63	0.16	-2.22	0.215078	1.14	0.650007	12	KLK5, TMCC3, HIST1H2BN, GPC6, LETM2, IFNE, AKR7L, NKAIN1, RASEF, SUPT3H, SH3D19, ARGFX
20517916	MIMAT0018085	hsa-miR-3663-3p	5.33	5.15	4.48	1.06	0.5	0.63	1.8	0.858928	1.59	0.539017	9	APOBEC3G, CLDN7, GPC6, TMCC3, ZNF208, ITGAM, SH3D19, CMC1, PON3
20517917	MIMAT0018086	hsa-miR-3664-5p	1.05	0.67	1.3	0.08	0.23	0.41	-1.19	0.492202	-1.55	0.120899	10	BICC1, LETM2, GDA, LRP1B, HIST1H2BN, RAB19, RASEF, IFNE, SH3D19, ITGAM
20536572	MI0016069	hsa-mir-3668	1.17	0.94	0.79	0.4	0.22	0.2	1.31	0.069258	1.11	0.245938	9	PON3, GLYATL2, SEMA3D, ZNF208, CACNB4, SH3D19, LRP1B, BICC1, CMC1
20501221	MIMAT0004686	hsa-miR-367-5p	0.95	0.59	1.25	0.05	0.24	0.22	-1.23	0.128354	-1.58	0.193842	9	ZNF208, BICC1, AKR7L, GPC6, GDA, IFNE, SH3D19, CMC1, ARGFX
20517925	MIMAT0018093	hsa-miR-3670	0.97	1.09	1.59	0.07	0.18	0.38	-1.54	0.10569	-1.41	0.261347	11	CLDN7, SEMA3D, CLEC4M, DEFB132, ZNF208, NKAIN1, RAB19, GDA, CACNB4, SH3D19, ARGFX
20517931	MIMAT0018099	hsa-miR-3675-3p	1.41	1.05	1.53	0.25	0.26	0.34	-1.08	0.893227	-1.4	0.277479	9	GBP7, NKAIN1, BICC1, GPRASP1, ZNF208, SUPT3H, RAB19, PON3, CMC1
20517939	MIMAT0018107	hsa-miR-3680-3p	1.04	1.55	1.15	0.1	0.17	0.35	-1.08	0.379278	1.32	0.516345	18	TEX13A, DEFB132, APOBEC3G, TRIM49, HIST1H2BN, CLEC4M, RASEF, CYP4F2, ZNF208, IFNE, SEMA3D, CACNB4, GDA, SUPT3H, CMC1, C8orf4, ARGFX, PON3
20536588	MI0016086	hsa-mir-3685	1.34	1.08	0.92	0.08	0.1	0.17	1.34	0.022843	1.12	0.603353	14	LETM2, GDA, CYP4F2, RASEF, SLIT3, TMCC3, ZNF208, BICC1, GPC6, CACNB4, GPRASP1, IFNE, HIST1H2BN, PON3
20517952	MIMAT0018118	hsa-miR-3689a-3p	0.86	1.42	0.72	0.07	0.47	0.13	1.1	0.397613	1.62	0.274505	12	CYP4A11, LRRC4B, GPC6, SLIT3, RAB19, C6orf222, TMCC3, HIST1H2BN, IFNE, ZNF208, SH3D19, ARGFX
20536747	MI0016837	hsa-mir-3689f	1.59	1.67	1.16	0.3	0.36	0.2	1.35	0.095386	1.43	0.365977	9	CT45A6, CACNB4, CYP4A11, TMCC3, HIST1H2BN, AC090616.2, ZNF208, IFNE, ARGFX
20517955	MIMAT0019224	hsa-miR-3691-3p	2.36	1.18	1.35	0.06	0.56	0.09	2	0.000987	-1.13	0.661745	11	NKAIN1, RP11-41O4.1, UGT2A1, TRIM49, GDA, IFNE, RAB19, GPC6, TMCC3, CMC1, UGT2A1
20536598	MI0016135	hsa-mir-3714	2.22	1.81	1.83	0.15	0.26	0.49	1.31	0.498204	-1.01	0.790118	17	HIST1H2BN, SLIT3, SEMA3D, TMCC3, CACNB4, UGT2A1, IFNE, TRIM49, AC090616.2, C6orf222, GDA, RAB19, SUPT3H, ZNF208, UGT2A1, PON3, ARGFX
20518000	MIMAT0018165	hsa-miR-3714	1.04	1.02	1.53	0.32	0.05	0.66	-1.4	0.444059	-1.42	0.287643	17	HIST1H2BN, SLIT3, SEMA3D, TMCC3, CACNB4, UGT2A1, IFNE, TRIM49, AC090616.2, C6orf222, GDA, RAB19, SUPT3H, ZNF208, UGT2A1, PON3, ARGFX
20501236	MIMAT0004688	hsa-miR-374a-3p	0.91	1.43	0.87	0.09	0.4	0.09	1.02	0.51872	1.46	0.164961	14	IFNA1, UGT2A1, PON3, UGT2A1, CACNB4, NKAIN1, RASEF, GDA, SUPT3H, ZNF208, TMCC3, CMC1, ARGFX, SH3D19
20518431	MIMAT0018184	hsa-miR-3910	1.4	1.15	0.96	0.3	0.46	0.38	1.35	0.24904	1.14	0.705736	14	PRR15, TRIM49, HOXD10, CACNB4, SEMA3D, SH3D19, HIST1H2BN, RASEF, TMCC3, SLIT3, AC090616.2, GPC6, ZNF208, GDA
20518439	MIMAT0018190	hsa-miR-3916	1.52	1.61	1.96	0.66	0.5	0.43	-1.35	0.885015	-1.27	0.246681	10	DEFB132, TRIM49, NKAIN1, GPC6, IFNE, HIST1H2BN, AC090616.2, SLIT3, LRP1B, SH3D19
20518451	MIMAT0018200	hsa-miR-3925-5p	1.3	1.21	0.83	0.2	0.35	0.41	1.38	0.508609	1.3	0.689115	14	DEFB132, NKAIN1, UGT2A1, TMCC3, ANXA9, UGT2A1, CLEC4M, GDA, SH3D19, SLIT3, IFNE, CACNB4, GPC6, PON3
20518621	MIMAT0018349	hsa-miR-3934-5p	1.01	1.48	1.41	0.25	0.56	0.42	-1.32	0.329772	1.05	0.86894	14	FSCN3, TMCC3, CYP4A11, AKR7L, NKAIN1, RAB19, GDA, HIST1H2BN, ZNF208, IFNE, SUPT3H, SLIT3, SH3D19, ARGFX
20503096	MIMAT0026558	hsa-miR-410-5p	0.96	0.68	1.32	0.32	0.32	0.3	-1.28	0.936104	-1.56	0.502071	9	GPC6, KRTAP10-11, NKAIN1, TMCC3, AKR7L, SLIT3, IFNE, GDA, CMC1
20536475	MI0015864	hsa-mir-4252	0.78	1.18	1.35	0.23	0.31	0.28	-1.49	0.006135	-1.12	0.700613	9	PON3, CLEC4M, RAB19, CACNB4, RASEF, SLIT3, ZNF208, HIST1H2BN, ARGFX
20536470	MI0015859	hsa-mir-4260	0.84	0.7	1.15	0.13	0.25	0.42	-1.24	0.213156	-1.37	0.232844	13	NKAIN1, LRRC4B, DEFB132, CT45A6, PRR15, AC090616.2, RASEF, SEMA3D, PON3, ZNF208, GPC6, ARGFX, CMC1
20536479	MI0015868	hsa-mir-4261	0.95	1.71	0.98	0.28	0.61	0.13	-1.02	0.8363	1.66	0.292156	13	UGT2A1, UGT2A1, HIST1H2BN, CACNB4, AKR7L, CLEC4M, SEMA3D, BICC1, RASEF, CMC1, ARGFX, SH3D19, GPC6
20517727	MIMAT0016898	hsa-miR-4263	1.64	1.16	0.82	0.38	0.29	0.17	1.76	0.200319	1.26	0.604985	20	ARGFX, GDA, UGT2A1, C8orf4, FSCN3, ZNF208, AKR7L, CACNB4, BICC1, SEMA3D, HIST1H2BN, SLIT3, TMCC3, NKAIN1, IFNE, SUPT3H, CMC1, UGT2A1, SH3D19, PON3
20517728	MIMAT0016899	hsa-miR-4264	1.11	1.4	0.84	0.2	0.37	0.21	1.21	0.227791	1.48	0.072006	11	GDA, KLK5, CYP4F2, SLIT3, ZNF208, RAB19, RASEF, IFNE, SH3D19, CMC1, ARGFX
20536481	MI0015870	hsa-mir-4266	1.29	0.86	0.82	0.4	0.46	0.22	1.38	0.263661	1.02	0.21877	10	DEFB132, FSCN3, TMCC3, ZNF208, RAB19, SLIT3, GPC6, SH3D19, CMC1, PON3
20536498	MI0015887	hsa-mir-4279	1.42	1.01	1.02	0.15	0.24	0.22	1.32	0.201764	-1.01	0.97952	18	C8orf4, CT45A6, GDA, HIST1H2BN, SLIT3, CACNB4, SEMA3D, NKAIN1, UGT2A1, IFNE, LRP1B, LETM2, BICC1, LRRC4B, AC090616.2, SH3D19, UGT2A1, ARGFX
20517743	MIMAT0016914	hsa-miR-4283	1.5	0.95	0.85	0.37	0.18	0.57	1.57	0.265585	1.07	0.876605	10	KRTAP10-11, TMCC3, GDA, NKAIN1, SLIT3, LRRC4B, HIST1H2BN, SH3D19, PON3, ARGFX
20517749	MIMAT0016920	hsa-miR-4289	1.13	1.26	0.81	0.16	0.24	0.16	1.25	0.291059	1.37	0.246337	11	PRR15, RP11-41O4.1, GPC6, IFNE, AC090616.2, RASEF, LRP1B, ZNF208, TMCC3, CMC1, ARGFX
20517751	MIMAT0016922	hsa-miR-4291	1.5	0.97	0.98	0.25	0.38	0.14	1.43	0.166736	-1.01	0.915082	15	INO80C, KRTAP10-11, UGT2A1, RASEF, C6orf222, TRIM49, LRP1B, CT45A6, CYP4A11, SEMA3D, RAB19, ZNF208, SLIT3, UGT2A1, PON3
20536435	MI0015824	hsa-mir-4297	0.89	1.27	1.33	0.16	0.17	0.11	-1.36	0.165528	-1.04	0.875555	12	APOBEC3G, TMCC3, SEMA3D, NKAIN1, GDA, BICC1, CYP4A11, RAB19, IFNE, ZNF208, SLIT3, CMC1
20536445	MI0015834	hsa-mir-4303	1.21	0.96	0.83	0.25	0.02	0.13	1.3	0.399281	1.09	0.231915	13	RASEF, GLYATL2, GDA, APOBEC3G, KRTAP10-11, NKAIN1, C6orf222, SLIT3, CACNB4, SUPT3H, IFNE, SH3D19, ARGFX
20517684	MIMAT0016856	hsa-miR-4303	0.9	0.74	1.13	0.37	0.39	0.33	-1.17	0.479048	-1.31	0.009829	13	RASEF, GLYATL2, GDA, APOBEC3G, KRTAP10-11, NKAIN1, C6orf222, SLIT3, CACNB4, SUPT3H, IFNE, SH3D19, ARGFX
20536457	MI0015846	hsa-mir-4314	1.45	1.32	0.83	0.29	0.35	0.47	1.54	0.172955	1.4	0.678649	10	KLK5, LETM2, C6orf222, NKAIN1, BICC1, SEMA3D, SLIT3, RASEF, CACNB4, SUPT3H
20536458	MI0015847	hsa-mir-4318	1.33	0.82	0.78	0.37	0.17	0.25	1.46	0.100063	1.03	0.835272	11	DEFB132, CYP4F2, CACNB4, ZNF208, BICC1, RASEF, SLIT3, SH3D19, CMC1, C8orf4, PON3
20503800	MIMAT0002814	hsa-miR-432-5p	1.01	1.31	0.77	0.22	0.19	0.22	1.18	0.656153	1.46	0.123039	17	INO80C, PRR15, C8orf4, SMR3A, GDA, CLEC4M, APOBEC3G, DEFB132, FSCN3, LETM2, ANXA9, SEMA3D, AKR7L, BICC1, ZNF208, TMCC3, CMC1
20517701	MIMAT0016873	hsa-miR-4322	1.47	1.74	1.27	0.42	0.33	0.21	1.15	0.414607	1.39	0.03867	11	SMR3A, KRTAP10-11, GPC6, HOXD10, RASEF, TMCC3, SLIT3, AKR7L, IFNE, CMC1, ARGFX
20517704	MIMAT0016876	hsa-miR-4324	2.45	3.06	1.49	0.06	0.54	1.03	1.94	0.596354	2.96	0.319627	10	KRTAP10-11, TMCC3, AKR7L, RAB19, RASEF, GPC6, SLIT3, CMC1, SH3D19, PON3
20517716	MIMAT0016888	hsa-miR-4326	0.79	0.91	1.35	0.17	0.32	0.49	-1.47	0.198269	-1.36	0.625191	9	NKAIN1, TMCC3, GDA, IFNE, SUPT3H, SEMA3D, SH3D19, C8orf4, ARGFX
20536512	MI0015901	hsa-mir-4329	0.76	0.86	1.36	0.15	0.08	0.46	-1.52	0.342719	-1.42	0.436613	15	RP11-41O4.1, GLYATL2, DEFB132, KRTAP10-11, RASEF, NKAIN1, CACNB4, ITGAM, C6orf222, TMCC3, IFNE, SUPT3H, CMC1, ARGFX, GPC6
20517752	MIMAT0016923	hsa-miR-4329	1.66	1.14	1.28	0.24	0.12	0.17	1.3	0.255259	-1.11	0.298554	15	RP11-41O4.1, GLYATL2, DEFB132, KRTAP10-11, RASEF, NKAIN1, CACNB4, ITGAM, C6orf222, TMCC3, IFNE, SUPT3H, CMC1, ARGFX, GPC6
20518787	MIMAT0018931	hsa-miR-4419a	2.62	3.23	3.39	0.52	0.22	0.74	-1.71	0.431952	-1.12	0.9281	11	NKAIN1, PGLYRP3, SLIT3, KRTAP10-11, LRRC4B, TMCC3, LRP1B, AC090616.2, CACNB4, HOXD10, SH3D19
20536773	MI0016861	hsa-mir-4419b	0.95	0.94	1.59	0.05	0.13	0.73	-1.56	0.326681	-1.58	0.258814	18	RP11-41O4.1, PRR15, NKAIN1, TMCC3, C6orf222, CLDN7, SH3D19, CLEC4M, GPC6, SLIT3, IFNE, ZNF208, RAB19, LRP1B, SUPT3H, CMC1, ARGFX, PON3
20536669	MI0016757	hsa-mir-4420	0.76	0.94	1.34	0.19	0.09	0.39	-1.49	0.21222	-1.32	0.51279	17	PRB4, RP11-41O4.1, CYP4A11, TMCC3, GBP7, ITGAM, FSCN3, ZNF208, RASEF, HIST1H2BN, IFNE, CACNB4, GPC6, SEMA3D, C6orf222, SH3D19, CMC1
20518791	MIMAT0018935	hsa-miR-4422	1.02	1.62	0.88	0.12	0.41	0.08	1.1	0.347958	1.67	0.115214	17	TAS2R30, CMC1, GDA, SLIT3, C8orf4, GPRASP1, BICC1, GPC6, CACNB4, ZNF208, SEMA3D, PCDHB13, RASEF, TMCC3, SUPT3H, ARGFX, PON3
20518797	MIMAT0018940	hsa-miR-4425	2.44	1.68	2.2	1.3	0.43	0.29	1.18	0.811777	-1.44	0.078802	9	NKAIN1, CYP4A11, SH3D19, SLIT3, ZNF208, SUPT3H, CACNB4, CMC1, ARGFX
20518798	MIMAT0018941	hsa-miR-4426	1.36	0.65	0.9	0.41	0.23	0.19	1.38	0.520471	-1.19	0.733252	16	PTH2, DEFB132, CACNB4, LETM2, CYP4F2, BICC1, SH3D19, NKAIN1, SLIT3, SEMA3D, TMCC3, RAB19, SUPT3H, LRP1B, CMC1, ARGFX
20518800	MIMAT0018943	hsa-miR-4428	2.1	1.78	2.79	0.08	0.52	0.29	-1.61	0.151598	-2.01	0.187169	12	DEFB132, GDA, HIST1H2BN, CYP4A11, CLDN7, TMCC3, ITGAM, SLIT3, RASEF, SUPT3H, CMC1, PON3
20518809	MIMAT0018951	hsa-miR-4435	1.1	1.97	1.83	0.23	0.51	0.18	-1.66	0.005759	1.11	0.84625	10	ANXA9, KRTAP10-3, HIST1H2BN, LETM2, GPC6, NKAIN1, SEMA3D, ZNF208, IFNE, ARGFX
20536686	MI0016776	hsa-mir-4436a	1.9	1.73	1.38	0.2	0.2	0.16	1.43	0.003693	1.27	0.008723	9	KRTAP10-3, BICC1, CLDN7, C6orf222, RASEF, TMCC3, HIST1H2BN, NKAIN1, SUPT3H
20536695	MI0016784	hsa-mir-4441	1.13	1.22	0.81	0.22	0.16	0.28	1.25	0.216858	1.33	0.286437	11	NKAIN1, SLIT3, UGT2A1, KLK5, CYP4A11, RASEF, SH3D19, HIST1H2BN, UGT2A1, ARGFX, PON3
20518822	MIMAT0019233	hsa-miR-4446-5p	1	1.06	1.45	0.35	0.54	0.25	-1.36	0.217376	-1.31	0.320751	12	CACNB4, BICC1, SLIT3, GPC6, GDA, SEMA3D, ZNF208, SH3D19, ITGAM, TMCC3, RASEF, SUPT3H
20518824	MIMAT0018966	hsa-miR-4447	1.56	1.68	1.03	0.59	0.62	1.01	1.44	0.957462	1.57	0.888816	9	CYP4A11, CLEC4M, KLK5, ANXA9, LRRC4B, AKR7L, NKAIN1, SLIT3, ARGFX
20518831	MIMAT0018973	hsa-miR-4451	1.4	0.84	0.8	0.37	0.57	0.27	1.52	0.383715	1.03	0.856998	11	UGT2A1, UGT2A1, BICC1, C6orf222, HIST1H2BN, RAB19, NKAIN1, CACNB4, SUPT3H, CMC1, GPC6
20518841	MIMAT0018983	hsa-miR-4461	5.01	4.27	4.95	0.09	0.74	0.44	1.04	0.693323	-1.61	0.046562	13	PRR15, GDA, APOBEC3G, ZNF208, FSCN3, SH3D19, GPC6, TRIM49, SUPT3H, KLK5, SEMA3D, CMC1, ARGFX
20536730	MI0016821	hsa-mir-4470	0.92	1.35	0.89	0.05	0.45	0.23	1.03	0.673486	1.38	0.081459	11	CACNB4, GPC6, SLIT3, IFNE, GPRASP1, C6orf222, RASEF, ZNF208, LRP1B, CMC1, ARGFX
20536736	MI0016828	hsa-mir-4476	0.94	1.45	0.79	0.19	0.18	0.15	1.11	0.59695	1.58	0.089051	13	NKAIN1, GLYATL2, CYP4A11, LRRC4B, GPC6, GDA, SH3D19, HIST1H2BN, AC090616.2, SLIT3, SUPT3H, CMC1, ARGFX
20518862	MIMAT0019003	hsa-miR-4476	1.66	1.49	1.25	0.35	0.38	0.24	1.32	0.368402	1.18	0.47962	13	NKAIN1, GLYATL2, CYP4A11, LRRC4B, GPC6, GDA, SH3D19, HIST1H2BN, AC090616.2, SLIT3, SUPT3H, CMC1, ARGFX
20518865	MIMAT0019006	hsa-miR-4478	2.13	2.26	1.75	0.5	0.49	0.28	1.3	0.476259	1.43	0.348757	18	RP11-41O4.1, PRR15, NKAIN1, TMCC3, C6orf222, CLDN7, SH3D19, CLEC4M, GPC6, SLIT3, IFNE, ZNF208, RAB19, LRP1B, SUPT3H, CMC1, ARGFX, PON3
20536764	MI0016852	hsa-mir-4490	1.02	0.8	1.2	0.25	0.19	0.2	-1.13	0.796317	-1.32	0.232689	11	CYP4F2, LETM2, SH3D19, BICC1, GDA, SLIT3, RAB19, GPRASP1, IFNE, TMCC3, PON3
20518889	MIMAT0019029	hsa-miR-4494	1.07	0.62	1.19	0.19	0.22	0.64	-1.09	0.786976	-1.48	0.20596	16	KRTAP10-3, AKR7L, GDA, CT45A6, CYP4A11, TMCC3, SLIT3, HIST1H2BN, SUPT3H, RAB19, BICC1, SH3D19, C8orf4, CMC1, ARGFX, PON3
20536770	MI0016858	hsa-mir-4496	0.93	1.08	1.42	0.09	0.16	0.29	-1.4	0.220804	-1.26	0.342104	19	CYP4A11, CACNB4, CYP4F2, LRRC4B, BICC1, ITGAM, RASEF, SEMA3D, TMCC3, HOXD10, FSCN3, GDA, IFNE, SUPT3H, GPRASP1, SH3D19, C8orf4, CMC1, PON3
20504577	MIMAT0010251	hsa-miR-449c-5p	1.09	0.95	0.66	0.18	0.31	0.22	1.34	0.115849	1.22	0.028213	13	PRR15, AKR7L, TMCC3, SEMA3D, HIST1H2BN, GDA, IFNE, NKAIN1, SLIT3, ZNF208, ITGAM, ARGFX, PON3
20518897	MIMAT0019037	hsa-miR-4501	1.34	0.85	0.95	0.14	0.25	0.08	1.31	0.068142	-1.07	0.556004	12	AC090616.2, CYP4F2, BICC1, HIST1H2BN, SEMA3D, SH3D19, AKR7L, SLIT3, LRP1B, GDA, SUPT3H, CMC1
20536777	MI0016865	hsa-mir-4502	1.52	1.39	1.83	0.41	0.11	0.23	-1.24	0.895867	-1.37	0.150017	11	TEX13A, ZNF208, NKAIN1, CACNB4, TMCC3, SLIT3, GDA, HIST1H2BN, SUPT3H, SH3D19, PON3
20518898	MIMAT0019038	hsa-miR-4502	1.26	1.66	2.13	0.05	0.08	0.34	-1.83	0.047683	-1.38	0.099339	11	TEX13A, ZNF208, NKAIN1, CACNB4, TMCC3, SLIT3, GDA, HIST1H2BN, SUPT3H, SH3D19, PON3
20518902	MIMAT0019042	hsa-miR-4506	1.15	0.83	1.28	0.24	0.18	0.18	-1.1	0.36376	-1.37	0.179229	9	CT45A6, DEFB132, NKAIN1, SEMA3D, GDA, LRP1B, CACNB4, PON3, IFNE
20518904	MIMAT0019044	hsa-miR-4507	6.16	5.97	5.71	0.13	0.18	0.3	1.37	0.231854	1.2	0.763125	12	GDA, AKR7L, PLCH1, KRTAP10-11, LETM2, ZNF208, LRP1B, GPC6, RASEF, RAB19, TMCC3, ARGFX
20535101	MI0001652	hsa-mir-450a-1	1.02	0.9	0.83	0.38	0.04	0.01	1.14	0.215148	1.05	0.118257	15	CT45A6, NKAIN1, GPC6, HIST1H2BN, CYP4A11, SH3D19, IFNE, RAB19, SLIT3, SUPT3H, ZNF208, C8orf4, CMC1, ARGFX, PON3
20535102	MI0001652	hsa-mir-450a-1	1.21	1.05	0.79	0.2	0.13	0.1	1.34	0.024786	1.2	0.123655	15	CT45A6, NKAIN1, GPC6, HIST1H2BN, CYP4A11, SH3D19, IFNE, RAB19, SLIT3, SUPT3H, ZNF208, C8orf4, CMC1, ARGFX, PON3
20502374	MIMAT0022700	hsa-miR-450a-1-3p	0.77	0.91	1.2	0.32	0.23	0.07	-1.34	0.325849	-1.22	0.451071	15	CT45A6, NKAIN1, GPC6, HIST1H2BN, CYP4A11, SH3D19, IFNE, RAB19, SLIT3, SUPT3H, ZNF208, C8orf4, CMC1, ARGFX, PON3
20536794	MI0016882	hsa-mir-4516	1.1	0.93	1.44	0.15	0.07	0.38	-1.27	0.330314	-1.43	0.123098	19	KRTAP10-11, IFNE, GLYATL2, NKAIN1, KRTAP10-3, RAB19, CYP4A11, LETM2, GDA, TMCC3, SLIT3, GPC6, HIST1H2BN, ZNF208, SUPT3H, LRRC4B, CMC1, PON3, ARGFX
20518914	MIMAT0019054	hsa-miR-4517	1.27	1.92	1.51	0.44	0.46	0.26	-1.18	0.598625	1.33	0.212459	15	IFNE, ITGAM, UGT2A1, SEMA3D, RASEF, TMCC3, LRP1B, HIST1H2BN, GPC6, GDA, SLIT3, CACNB4, ZNF208, CMC1, UGT2A1
20519561	MIMAT0019840	hsa-miR-451b	0.96	0.96	1.37	0.2	0.18	0.3	-1.33	0.139856	-1.32	0.39283	13	RP11-41O4.1, ITGAM, GPC6, GDA, SH3D19, RAB19, SLIT3, SUPT3H, LRP1B, BICC1, CMC1, ARGFX, PON3
20518923	MIMAT0019062	hsa-miR-4524a-5p	0.79	0.64	1.06	0.26	0.23	0.07	-1.2	0.599089	-1.34	0.170194	13	C8orf4, OR2M7, SEMA3D, SLIT3, TMCC3, AKR7L, CYP4F2, HIST1H2BN, RAB19, IFNE, RASEF, GPRASP1, GPC6
20521782	MIMAT0022256	hsa-miR-4524b-3p	0.95	1.16	0.78	0.25	0.16	0.04	1.12	0.34567	1.3	0.048707	15	CYP4A11, LETM2, KRTAP10-3, NKAIN1, HIST1H2BN, AC090616.2, SLIT3, AKR7L, TMCC3, SEMA3D, RAB19, IFNE, BICC1, CMC1, SH3D19
20521781	MIMAT0022255	hsa-miR-4524b-5p	1.29	1.32	0.92	0.35	0.39	0.33	1.29	0.806221	1.32	0.545572	13	C8orf4, OR2M7, SEMA3D, SLIT3, TMCC3, AKR7L, CYP4F2, HIST1H2BN, RAB19, IFNE, RASEF, GPRASP1, GPC6
20536806	MI0016893	hsa-mir-4526	1.3	1.49	1.02	0.21	0.39	0.23	1.21	0.361814	1.38	0.100448	10	TMCC3, GDA, C8orf4, DEFB132, RASEF, SH3D19, SEMA3D, CACNB4, PON3, CLDN7
20518928	MIMAT0019067	hsa-miR-4528	0.94	0.69	1.08	0.07	0.36	0.34	-1.1	0.702967	-1.31	0.386018	14	CACNB4, LETM2, SEMA3D, HOXD10, BICC1, AC090616.2, GDA, ZNF208, TMCC3, GPC6, PCDHB13, SLIT3, SH3D19, PON3
20536811	MI0016898	hsa-mir-4531	1.04	1.08	1.43	0.03	0.21	0.2	-1.31	0.080149	-1.27	0.302523	15	KRTAP10-11, KRTAP10-3, IFNE, GDA, CYP4A11, GPC6, PGLYRP3, ZNF208, RAB19, RASEF, NKAIN1, LRRC4B, SUPT3H, CMC1, ARGFX
20518932	MIMAT0019070	hsa-miR-4531	0.67	0.83	1.25	0.38	0.11	0.23	-1.49	0.285144	-1.34	0.080238	15	KRTAP10-11, KRTAP10-3, IFNE, GDA, CYP4A11, GPC6, PGLYRP3, ZNF208, RAB19, RASEF, NKAIN1, LRRC4B, SUPT3H, CMC1, ARGFX
20536813	MI0016900	hsa-mir-4533	1.95	1.29	0.93	0.42	0.16	0.91	2.03	0.454643	1.29	0.778033	12	SH3D19, LRRC4B, KLK5, CT45A6, SLIT3, GDA, LRP1B, NKAIN1, RASEF, RAB19, CACNB4, CMC1
20536823	MI0016910	hsa-mir-4539	1.87	1.77	2.55	0.37	0.27	0.51	-1.6	0.38308	-1.71	0.327229	9	CLDN7, RP11-41O4.1, SH3D19, GPC6, DEFB132, CACNB4, SLIT3, LRP1B, IFNE
20519420	MIMAT0019702	hsa-miR-4642	1.08	0.89	1.28	0.24	0.18	0.09	-1.15	0.19894	-1.31	0.083924	11	LETM2, UGT2A1, GPRASP1, PCDHB13, BICC1, GDA, ZNF208, IFNE, SLIT3, UGT2A1, ARGFX
20519421	MIMAT0019703	hsa-miR-4643	0.67	1.12	1.15	0.31	0.1	0.27	-1.39	0.714292	-1.02	0.494633	14	CLEC4M, ITGAM, GPC6, TMCC3, GDA, CACNB4, ZNF208, SLIT3, SUPT3H, BICC1, PCDHB13, IFNE, C8orf4, CMC1
20536867	MI0017274	hsa-mir-4647	2.7	2.7	1.92	0.33	0.33	0.13	1.71	0.057443	1.71	0.02713	16	PTH2, DEFB132, CACNB4, LETM2, CYP4F2, BICC1, SH3D19, NKAIN1, SLIT3, SEMA3D, TMCC3, RAB19, SUPT3H, LRP1B, CMC1, ARGFX
20519427	MIMAT0019709	hsa-miR-4647	1.65	1.88	1.23	0.25	0.44	0.24	1.34	0.129944	1.57	0.194335	16	PTH2, DEFB132, CACNB4, LETM2, CYP4F2, BICC1, SH3D19, NKAIN1, SLIT3, SEMA3D, TMCC3, RAB19, SUPT3H, LRP1B, CMC1, ARGFX
20519430	MIMAT0019712	hsa-miR-4649-3p	1.26	1.63	0.9	0.29	0.41	0.12	1.28	0.333791	1.66	0.073814	17	RP11-41O4.1, APOBEC3G, GPRASP1, CLEC4M, AKR7L, FSCN3, KRTAP10-11, SLIT3, RAB19, CACNB4, RASEF, GDA, ZNF208, DEFB132, HIST1H2BN, SH3D19, PON3
20519432	MIMAT0019714	hsa-miR-4650-3p	1.21	0.8	0.8	0.44	0.23	0.12	1.33	0.150107	-1	0.97656	9	CYP4F2, HIST1H2BN, BICC1, GDA, CACNB4, SH3D19, SUPT3H, CMC1, GPC6
20519435	MIMAT0019717	hsa-miR-4652-3p	0.74	0.77	1.32	0.09	0.09	0.16	-1.5	0.043697	-1.47	0.055979	19	ZNF208, CYP4F2, GPC6, GLYATL2, GDA, APOBEC3G, AC090616.2, RASEF, TMCC3, SEMA3D, C6orf222, SUPT3H, LETM2, BICC1, CACNB4, IFNE, HIST1H2BN, CMC1, ARGFX
20536875	MI0017282	hsa-mir-4654	1.06	1.07	1.66	0.17	0.19	0.51	-1.51	0.175006	-1.5	0.275691	11	NKAIN1, RP11-41O4.1, KRTAP10-3, LRRC4B, GDA, IFNE, C6orf222, SLIT3, SUPT3H, CMC1, CLEC4M
20536878	MI0017285	hsa-mir-4657	1.59	1.29	1.07	0.26	0.48	0.62	1.44	0.957344	1.16	0.269259	12	TAS2R30, CACNB4, GBP7, GPC6, C6orf222, GPRASP1, GDA, RASEF, SEMA3D, AC090616.2, SLIT3, CMC1
20536223	MI0014157	hsa-mir-466	1.05	1.58	1.07	0.14	0.38	0.53	-1.02	0.509525	1.42	0.988038	10	TMCC3, GPC6, GDA, CLEC4M, PCDHB13, CACNB4, BICC1, RASEF, C8orf4, CMC1
20519460	MIMAT0019742	hsa-miR-4666a-3p	1.27	0.89	0.79	0.35	0.12	0.01	1.4	0.10184	1.08	0.111218	17	PON3, TRIM49, RASEF, DEFB132, ZNF208, GDA, SEMA3D, IFNE, BICC1, RAB19, CYP4A11, GPC6, HIST1H2BN, LRP1B, SUPT3H, SH3D19, CMC1
20537214	MI0019299	hsa-mir-4666b	1.19	0.94	0.6	0.39	0.06	0.3	1.5	0.478552	1.27	0.483521	9	DEFB132, C8orf4, SH3D19, C6orf222, SLIT3, TRIM49, CLEC4M, TMCC3, CMC1
20519473	MIMAT0019755	hsa-miR-4673	1.54	2.08	1.38	0.22	0.62	0.91	1.11	0.487917	1.62	0.748261	13	CT45A6, ZNF208, C8orf4, LETM2, NKAIN1, IFNE, TMCC3, RAB19, GPC6, ITGAM, ARGFX, CMC1, SEMA3D
20519476	MIMAT0019758	hsa-miR-4676-5p	1.08	0.99	1.53	0.9	0.77	0.52	-1.37	0.919505	-1.45	0.620357	10	TMCC3, CACNB4, AC090616.2, C6orf222, SLIT3, RASEF, RAB19, SEMA3D, ARGFX, GPC6
20519479	MIMAT0019761	hsa-miR-4677-3p	1.37	1.29	0.91	0.29	0.83	0.06	1.38	0.066248	1.3	0.374328	13	ZNF208, APOBEC3G, GBP7, AKR7L, GPC6, SEMA3D, CACNB4, TMCC3, HIST1H2BN, SLIT3, RAB19, PCDHB13, CMC1
20536913	MI0017315	hsa-mir-4683	1.93	2.55	2.66	0.02	0.47	0.1	-1.65	0.006574	-1.07	0.692586	10	CLDN7, KRTAP10-3, APOBEC3G, CYP4A11, IFNE, HIST1H2BN, SUPT3H, SLIT3, CACNB4, CMC1
20519486	MIMAT0019768	hsa-miR-4683	2.38	2.52	3.17	0.12	0.6	1.13	-1.73	0.382007	-1.57	0.357478	10	CLDN7, KRTAP10-3, APOBEC3G, CYP4A11, IFNE, HIST1H2BN, SUPT3H, SLIT3, CACNB4, CMC1
20519488	MIMAT0019770	hsa-miR-4684-3p	3.11	2.67	2.5	0.2	0.25	0.37	1.52	0.03451	1.12	0.955594	10	GPRASP1, C8orf4, FSCN3, CACNB4, ZNF208, GDA, SUPT3H, BICC1, CYP4A11, HIST1H2BN
20519490	MIMAT0019772	hsa-miR-4685-3p	3.17	1.69	2.65	1.05	0.57	0.7	1.44	0.24515	-1.94	0.711861	10	C8orf4, CLDN7, SLIT3, DEFB132, RASEF, HIST1H2BN, IFNE, LRRC4B, RAB19, CMC1
20519489	MIMAT0019771	hsa-miR-4685-5p	2.33	2.78	3.86	0.35	0.81	0.44	-2.89	0.040439	-2.1	0.256382	11	CYP4A11, ZNF208, PRR15, NKAIN1, SLIT3, KRTAP10-11, C6orf222, HIST1H2BN, TMCC3, DEFB132, ARGFX
20519499	MIMAT0019780	hsa-miR-4690-3p	1.15	1.09	0.73	0.15	0.34	0.11	1.33	0.061962	1.28	0.160248	10	KLK5, CLDN7, CACNB4, RASEF, NKAIN1, C6orf222, TMCC3, RAB19, SUPT3H, ARGFX
20519501	MIMAT0019782	hsa-miR-4691-3p	1.43	1.13	1.01	0.19	0.21	0.18	1.33	0.018199	1.08	0.405883	12	PRR15, CLEC4M, AKR7L, ANXA9, DEFB132, BICC1, ZNF208, SLIT3, RAB19, CACNB4, CMC1, SH3D19
20519500	MIMAT0019781	hsa-miR-4691-5p	0.81	1.3	0.73	0.24	0.34	0.26	1.06	0.783638	1.49	0.371825	14	ZNF208, NKAIN1, PRR15, SLIT3, BICC1, GPC6, IFNE, AKR7L, HOXD10, TMCC3, AC090616.2, C6orf222, RAB19, CMC1
20519502	MIMAT0019783	hsa-miR-4692	1.18	1.9	1.18	0.14	0.15	0.27	1	0.983915	1.65	0.112983	12	CYP4A11, KRTAP10-11, C8orf4, CT45A6, PRR15, BICC1, CLDN7, HIST1H2BN, NKAIN1, ITGAM, GPC6, SH3D19
20536929	MI0017331	hsa-mir-4698	1.31	0.9	1.46	0.23	0.28	0.49	-1.11	0.684758	-1.48	0.251056	26	RP11-41O4.1, DEFB132, LRP1B, CACNB4, GDA, GBP7, IFNE, GPC6, HOXD10, RASEF, PON3, ZNF208, BICC1, SEMA3D, NKAIN1, C8orf4, HIST1H2BN, TMCC3, RAB19, KRTAP10-11, SH3D19, SLIT3, PCDHB13, CMC1, SUPT3H, ARGFX
20519518	MIMAT0019799	hsa-miR-4701-3p	4.28	4.2	4.61	0.14	0.42	0.1	-1.26	0.030695	-1.33	0.197912	13	GLYATL2, NKAIN1, CLEC4M, RAB19, GDA, PCDHB13, LETM2, SLIT3, SEMA3D, ZNF208, SUPT3H, ARGFX, PON3
20519527	MIMAT0019809	hsa-miR-4708-5p	1.66	0.95	1.47	0.38	0.68	0.17	1.14	0.100624	-1.43	0.79301	11	KRTAP10-3, ANXA9, GLYATL2, GDA, ZNF208, NKAIN1, LETM2, C6orf222, TMCC3, SLIT3, IFNE
20519533	MIMAT0019815	hsa-miR-4710	4.2	4.43	4.7	0.29	0.39	0.76	-1.42	0.42474	-1.21	0.461856	9	NKAIN1, PGLYRP3, CYP4A11, CACNB4, AC090616.2, SEMA3D, GDA, LRRC4B, ARGFX
20519549	MIMAT0019830	hsa-miR-4717-3p	1.56	2	1.94	0.45	0.44	0.69	-1.3	0.406804	1.04	0.946195	10	KRTAP10-3, CACNB4, ITGAM, HIST1H2BN, BICC1, SLIT3, IFNE, TMCC3, PON3, CMC1
20536953	MI0017354	hsa-mir-4719	1.04	0.71	1.11	0.07	0.03	0.1	-1.05	0.315747	-1.33	0.02466	16	PRR15, PCDHB13, SEMA3D, GDA, CACNB4, IFNE, HIST1H2BN, RASEF, C6orf222, ITGAM, GPC6, C8orf4, ZNF208, TMCC3, CMC1, PON3
20519556	MIMAT0019837	hsa-miR-4722-3p	3.31	1.82	2.19	1.28	0.2	0.33	2.17	0.50379	-1.29	0.028158	15	CT45A6, PRR15, NKAIN1, DEFB132, LETM2, SLIT3, HIST1H2BN, CACNB4, AC090616.2, RAB19, SUPT3H, TMCC3, SH3D19, CMC1, ARGFX
20519559	MIMAT0019838	hsa-miR-4723-5p	1.05	1.25	1.47	0.73	0.19	0.12	-1.33	0.999035	-1.16	0.561071	14	NKAIN1, SLIT3, PCDHB13, KLK5, CLEC4M, TMCC3, CYP4A11, SEMA3D, GPC6, ARGFX, SH3D19, IFNE, LETM2, AKR7L
20519567	MIMAT0019846	hsa-miR-4726-3p	1.5	0.99	0.89	0.34	0.33	0.15	1.52	0.315542	1.07	0.417469	12	CLDN7, ANXA9, KLK5, APOBEC3G, CLEC4M, GDA, IFNE, SLIT3, ZNF208, ARGFX, SH3D19, PON3
20519581	MIMAT0019860	hsa-miR-4735-5p	0.78	0.53	1.16	0.27	0.19	0.44	-1.31	0.665027	-1.56	0.099676	18	GLYATL2, APOBEC3G, GPC6, UGT2A1, ZNF208, RASEF, GDA, BICC1, LETM2, HIST1H2BN, SEMA3D, LRP1B, IFNE, NKAIN1, SH3D19, ARGFX, CMC1, UGT2A1
20536972	MI0017373	hsa-mir-4736	1.7	1.14	1.06	0.43	0.71	0.2	1.56	0.093023	1.05	0.277696	10	CYP4A11, CACNB4, SLIT3, PRR15, LRRC4B, GDA, GPC6, SUPT3H, SH3D19, ARGFX
20536987	MI0017387	hsa-mir-4748	1.55	1.4	2.03	0.16	0.12	0.62	-1.39	0.614639	-1.54	0.429552	11	APOBEC3G, RASEF, AKR7L, CT45A6, ZNF208, SH3D19, HIST1H2BN, C6orf222, GPC6, IFNE, PCDHB13
20519623	MIMAT0019900	hsa-miR-4756-3p	1.03	0.81	1.22	0.25	0.16	0.19	-1.14	0.870439	-1.33	0.345023	11	KRTAP10-3, TMCC3, GPC6, IFNE, NKAIN1, LRP1B, GDA, SUPT3H, CMC1, SH3D19, ARGFX
20519628	MIMAT0019905	hsa-miR-4759	0.87	1.25	1.37	0.33	0.34	0.05	-1.42	0.237657	-1.09	0.582607	10	UGT2A1, CMC1, UGT2A1, GPRASP1, CLDN7, TMCC3, ZNF208, SLIT3, SH3D19, ARGFX
20519629	MIMAT0019906	hsa-miR-4760-5p	0.9	0.63	1.16	0.08	0.25	0.07	-1.2	0.005153	-1.44	0.066453	9	DEFB132, C8orf4, GPC6, SH3D19, CYP4A11, SEMA3D, TMCC3, SLIT3, CMC1
20519634	MIMAT0019911	hsa-miR-4762-3p	0.76	1.04	0.62	0.17	0.38	0.33	1.1	0.896877	1.33	0.095014	15	ZNF208, C6orf222, SH3D19, AC090616.2, GDA, CACNB4, IFNE, HIST1H2BN, SLIT3, RAB19, SEMA3D, SUPT3H, ARGFX, CMC1, GPC6
20537007	MI0017406	hsa-mir-4765	0.87	1.14	1.35	0.23	0.18	0.18	-1.39	0.04202	-1.15	0.05242	12	RP11-41O4.1, SEMA3D, GDA, NKAIN1, BICC1, ANXA9, SH3D19, SLIT3, ZNF208, IFNE, RAB19, SUPT3H
20519644	MIMAT0019921	hsa-miR-4768-3p	1.2	0.91	0.67	0.33	0.18	0.25	1.44	0.05161	1.18	0.46599	18	TMCC3, KRTAP10-11, APOBEC3G, GDA, CLDN7, CT45A6, NKAIN1, RAB19, HIST1H2BN, LETM2, SEMA3D, KLK5, SLIT3, C6orf222, ZNF208, SH3D19, CMC1, ARGFX
20519645	MIMAT0019922	hsa-miR-4769-5p	1.13	1.73	1.11	0.22	0.45	0.32	1.01	0.56179	1.54	0.289743	11	NKAIN1, RP11-41O4.1, KRTAP10-3, LRRC4B, GDA, IFNE, C6orf222, SLIT3, SUPT3H, CMC1, CLEC4M
20519650	MIMAT0019927	hsa-miR-4772-3p	1.36	0.64	0.93	0.09	0.05	0.02	1.35	0.012482	-1.22	0.002449	9	TMCC3, LETM2, ZNF208, IFNE, GPC6, CACNB4, CMC1, SH3D19, ARGFX
20519653	MIMAT0019930	hsa-miR-4774-3p	1.4	1.28	0.94	0.21	0.57	0.18	1.37	0.180108	1.27	0.146295	12	AKR7L, GBP7, GDA, HIST1H2BN, BICC1, RASEF, NKAIN1, IFNE, RAB19, CMC1, SH3D19, ARGFX
20519656	MIMAT0019933	hsa-miR-4776-3p	1.49	1.12	1.56	0.57	0.65	0.6	-1.04	0.480829	-1.35	0.865674	18	UGT2A1, ZNF208, BICC1, UGT2A1, FSCN3, C8orf4, LRP1B, ANXA9, AC090616.2, CACNB4, TMCC3, NKAIN1, IFNE, HIST1H2BN, C6orf222, SLIT3, SH3D19, ARGFX
20537038	MI0017429	hsa-mir-4784	1.32	1.3	0.89	0.07	0.31	0.19	1.35	0.133925	1.33	0.221082	10	GLYATL2, KRTAP10-3, CACNB4, NKAIN1, HIST1H2BN, SLIT3, IFNE, GDA, SH3D19, PON3
20519671	MIMAT0019948	hsa-miR-4784	0.92	2.09	1.54	0.1	0.46	0.16	-1.54	0.009587	1.46	0.309864	10	GLYATL2, KRTAP10-3, CACNB4, NKAIN1, HIST1H2BN, SLIT3, IFNE, GDA, SH3D19, PON3
20519677	MIMAT0019954	hsa-miR-4786-5p	1.18	0.86	1.8	0.47	0.24	0.54	-1.55	0.168525	-1.92	0.025533	12	GLYATL2, NKAIN1, GDA, IFNE, TMCC3, AC090616.2, RAB19, HIST1H2BN, C6orf222, C8orf4, SH3D19, ARGFX
20537048	MI0017439	hsa-mir-4792	0.94	0.97	1.35	0.22	0.13	0.08	-1.33	0.032396	-1.31	0.010949	10	GLYATL2, NKAIN1, AC090616.2, CYP4A11, PGLYRP3, SLIT3, HIST1H2BN, RAB19, CACNB4, SEMA3D
20519692	MIMAT0019969	hsa-miR-4795-3p	1.25	0.91	0.86	0.23	0.18	0.1	1.31	0.115498	1.03	0.421556	23	C8orf4, HIST1H2BN, ZNF208, GBP7, LETM2, TRIM49, CYP4F2, SEMA3D, IFNE, DEFB132, GPC6, RASEF, CLEC4M, CACNB4, AC090616.2, SLIT3, LRP1B, BICC1, GPRASP1, PCDHB13, CMC1, SUPT3H, ARGFX
20503104	MIMAT0002176	hsa-miR-485-3p	0.8	1.3	1.21	0.03	0.28	0.23	-1.33	0.105112	1.06	0.102053	15	TAS2R30, PON3, CLEC4M, GDA, HIST1H2BN, BICC1, SEMA3D, AKR7L, ZNF208, CACNB4, GPC6, TMCC3, SUPT3H, CMC1, ARGFX
20503106	MIMAT0004762	hsa-miR-486-3p	4.93	3.36	4.92	1.9	1.35	0.79	1	0.299998	-2.95	0.060811	11	KRTAP10-3, SLIT3, LRRC4B, GPC6, CLDN7, RAB19, ZNF208, NKAIN1, TMCC3, HIST1H2BN, IFNE
20503790	MIMAT0004765	hsa-miR-491-3p	0.88	0.71	1.3	0.23	0.22	0.16	-1.33	0.070296	-1.51	0.03951	13	C8orf4, DEFB132, CT45A6, GPC6, CACNB4, RASEF, GDA, IFNE, CYP4A11, AC090616.2, SLIT3, PCDHB13, CMC1
20520202	MIMAT0021025	hsa-miR-5003-5p	0.94	1.73	0.96	0.3	0.57	0.35	-1.01	0.852558	1.71	0.485025	11	SLIT3, CACNB4, RASEF, GDA, AC090616.2, GPC6, TMCC3, SUPT3H, IFNE, ARGFX, SH3D19
20520219	MIMAT0021044	hsa-miR-5010-3p	0.74	0.83	1.23	0.15	0.16	0.27	-1.4	0.061581	-1.32	0.172808	20	HOXD10, CACNB4, GPC6, TAS2R30, ITGAM, SMR3A, GLYATL2, C8orf4, HIST1H2BN, BICC1, ZNF208, SEMA3D, GDA, IFNE, LRP1B, RASEF, AKR7L, SH3D19, CMC1, ARGFX
20503879	MIMAT0002873	hsa-miR-502-5p	3.41	4.52	3.82	0.79	1.42	0.06	-1.33	0.902269	1.62	0.915403	12	DEFB132, GDA, C8orf4, TMCC3, SLIT3, SEMA3D, NKAIN1, CACNB4, SUPT3H, IFNE, CMC1, ARGFX
20535216	MI0003194	hsa-mir-507	1.27	0.97	0.81	0.22	0.1	0.09	1.37	0.145438	1.12	0.583068	17	TEX13A, HIST1H2BN, SEMA3D, DEFB132, ZNF208, BICC1, CACNB4, CYP4F2, GDA, TRIM49, CLEC4M, RASEF, IFNE, SUPT3H, ARGFX, CMC1, PON3
20520333	MIMAT0021086	hsa-miR-5094	1.06	1.77	1.59	0.59	0.6	0.65	-1.45	0.015804	1.13	0.663036	13	ANXA9, PON3, UGT2A1, UGT2A1, C6orf222, BICC1, CT45A6, FSCN3, SEMA3D, AKR7L, GPC6, CACNB4, TMCC3
20503842	MIMAT0002847	hsa-miR-518c-5p	0.87	1.07	1.32	0.71	0.22	0.27	-1.36	0.905486	-1.19	0.525709	13	KRTAP10-3, CLEC4M, LETM2, KLK5, CYP4A11, CT45A6, C8orf4, NKAIN1, ZNF208, SLIT3, SUPT3H, CMC1, PON3
20520577	MIMAT0021128	hsa-miR-5196-5p	4.38	3.95	3.96	0.53	0.11	0.29	1.34	0.556787	-1.01	0.5011	17	KLK5, CYP4A11, BICC1, RP11-41O4.1, RASEF, GDA, CACNB4, LETM2, LRP1B, SEMA3D, SLIT3, SUPT3H, IFNE, RAB19, ARGFX, PON3, GPC6
20503848	MIMAT0026610	hsa-miR-519d-5p	1.36	0.75	0.75	0.28	0.31	0.07	1.52	0.093003	-1	0.575052	11	CLEC4M, CACNB4, DEFB132, GPC6, SEMA3D, HOXD10, HIST1H2BN, C6orf222, GDA, SH3D19, LRP1B
20518725	MIMAT0018447	hsa-miR-548aa	1.31	0.95	0.66	0.41	0.24	0.17	1.56	0.064643	1.22	0.130165	16	RP11-41O4.1, DEFB132, LETM2, NKAIN1, TMCC3, LRP1B, AC090616.2, RASEF, SEMA3D, GDA, SLIT3, SUPT3H, GPRASP1, CMC1, SH3D19, ARGFX
20518795	MIMAT0018938	hsa-miR-548ac	2.11	2.89	2.95	1.42	0.46	0.72	-1.78	0.908976	-1.04	0.955486	22	LETM2, INO80C, C8orf4, NKAIN1, CACNB4, GPC6, RASEF, BICC1, IFNE, GDA, C6orf222, TMCC3, SLIT3, AC090616.2, SUPT3H, PRR15, SEMA3D, RAB19, PCDHB13, CMC1, SH3D19, ARGFX
20518938	MIMAT0022740	hsa-miR-548am-5p	0.81	1.32	0.84	0.27	0.33	0.16	-1.02	0.665395	1.39	0.311967	18	LRRC4B, SH3D19, ITGAM, HOXD10, APOBEC3G, LRP1B, GDA, CACNB4, SEMA3D, IFNE, BICC1, HIST1H2BN, GPC6, TMCC3, ZNF208, SUPT3H, SLIT3, CMC1
20520213	MIMAT0021038	hsa-miR-548ap-3p	0.68	0.65	1.31	0.15	0.26	0.16	-1.54	0.09031	-1.58	0.085661	16	RP11-41O4.1, DEFB132, LETM2, NKAIN1, TMCC3, LRP1B, AC090616.2, RASEF, SEMA3D, GDA, SLIT3, SUPT3H, GPRASP1, CMC1, SH3D19, ARGFX
20521817	MIMAT0022278	hsa-miR-548at-3p	0.77	0.8	1.14	0.19	0.29	0.08	-1.3	0.250311	-1.27	0.377048	11	RP11-41O4.1, LETM2, APOBEC3G, DEFB132, LRP1B, SEMA3D, TMCC3, GPRASP1, SUPT3H, CMC1, SH3D19
20504360	MIMAT0004806	hsa-miR-548c-5p	0.81	1.32	0.84	0.27	0.33	0.16	-1.02	0.665395	1.39	0.311967	18	LRRC4B, SH3D19, ITGAM, HOXD10, APOBEC3G, LRP1B, GDA, CACNB4, SEMA3D, IFNE, BICC1, HIST1H2BN, GPC6, TMCC3, ZNF208, SUPT3H, SLIT3, CMC1
20535852	MI0006376	hsa-mir-548f-3	0.98	1.24	1.4	0.13	0.28	0.26	-1.34	0.207567	-1.12	0.451753	20	GLYATL2, DEFB132, GDA, CACNB4, GPC6, SH3D19, TMCC3, LRRC4B, ZNF208, SEMA3D, C6orf222, RASEF, SLIT3, CMC1, GPRASP1, SUPT3H, PCDHB13, C8orf4, ARGFX, PON3
20535853	MI0006376	hsa-mir-548f-3	0.96	1.06	1.33	0.07	0.2	0.16	-1.29	0.120183	-1.2	0.431485	20	GLYATL2, DEFB132, GDA, CACNB4, GPC6, SH3D19, TMCC3, LRRC4B, ZNF208, SEMA3D, C6orf222, RASEF, SLIT3, CMC1, GPRASP1, SUPT3H, PCDHB13, C8orf4, ARGFX, PON3
20535856	MI0006378	hsa-mir-548f-5	1.15	0.81	0.88	0.32	0.21	0.28	1.21	0.010139	-1.05	0.107474	16	AKR7L, TRIM49, AC090616.2, TMCC3, GPC6, SH3D19, HIST1H2BN, NKAIN1, RASEF, ITGAM, ZNF208, LRRC4B, GDA, C6orf222, BICC1, PON3
20535857	MI0006378	hsa-mir-548f-5	1.45	0.77	0.8	0.31	0.2	0.22	1.57	0.072886	-1.03	0.056567	16	AKR7L, TRIM49, AC090616.2, TMCC3, GPC6, SH3D19, HIST1H2BN, NKAIN1, RASEF, ITGAM, ZNF208, LRRC4B, GDA, C6orf222, BICC1, PON3
20535837	MI0006361	hsa-mir-548l	1.18	0.64	0.71	0.24	0.08	0.14	1.38	0.02864	-1.05	0.654151	19	INO80C, LRP1B, CACNB4, LRRC4B, ZNF208, SH3D19, HOXD10, SEMA3D, IFNE, ITGAM, GDA, GPC6, RASEF, TMCC3, BICC1, SLIT3, SUPT3H, CMC1, C8orf4
20518781	MIMAT0022738	hsa-miR-548o-5p	0.81	1.32	0.84	0.27	0.33	0.16	-1.02	0.665395	1.39	0.311967	18	LRRC4B, SH3D19, ITGAM, HOXD10, APOBEC3G, LRP1B, GDA, CACNB4, SEMA3D, IFNE, BICC1, HIST1H2BN, GPC6, TMCC3, ZNF208, SUPT3H, SLIT3, CMC1
20515549	MIMAT0022730	hsa-miR-548t-3p	1.31	0.95	0.66	0.41	0.24	0.17	1.56	0.064643	1.22	0.130165	16	RP11-41O4.1, DEFB132, LETM2, NKAIN1, TMCC3, LRP1B, AC090616.2, RASEF, SEMA3D, GDA, SLIT3, SUPT3H, GPRASP1, CMC1, SH3D19, ARGFX
20536296	MI0014222	hsa-mir-548w	1.39	0.91	0.99	0.09	0.29	0.07	1.32	0.04247	-1.05	0.563866	18	LRRC4B, SH3D19, ITGAM, HOXD10, APOBEC3G, LRP1B, GDA, CACNB4, SEMA3D, IFNE, BICC1, HIST1H2BN, GPC6, TMCC3, ZNF208, SUPT3H, SLIT3, CMC1
20536655	MI0016687	hsa-mir-550b-2	1.56	1.16	1.65	0.22	0.32	0.23	-1.06	0.082443	-1.41	0.182938	12	GPC6, CACNB4, SEMA3D, LRP1B, DEFB132, SH3D19, HIST1H2BN, GDA, TMCC3, RAB19, PCDHB13, NKAIN1
20518722	MIMAT0022737	hsa-miR-550b-2-5p	3.55	3.69	4.21	0.19	0.18	0.22	-1.58	0.007523	-1.43	0.307593	12	GPC6, CACNB4, SEMA3D, LRP1B, DEFB132, SH3D19, HIST1H2BN, GDA, TMCC3, RAB19, PCDHB13, NKAIN1
20504278	MIMAT0003221	hsa-miR-557	1.08	1.61	1.09	0.16	0.31	0.57	-1	0.673642	1.44	0.712037	17	TEX13A, HIST1H2BN, SEMA3D, DEFB132, ZNF208, BICC1, CACNB4, CYP4F2, GDA, TRIM49, CLEC4M, RASEF, IFNE, SUPT3H, ARGFX, CMC1, PON3
20537147	MI0019117	hsa-mir-5572	0.96	0.93	1.46	0.13	0.23	0.23	-1.41	0.019006	-1.44	0.193271	15	DEFB132, PRR15, CT45A6, CYP4F2, CACNB4, NKAIN1, AC090616.2, LRRC4B, CYP4A11, SEMA3D, GPC6, GDA, ZNF208, CMC1, ARGFX
20535299	MI0003564	hsa-mir-558	0.87	1.23	0.75	0.21	0.31	0.4	1.08	0.766573	1.4	0.256085	12	CT45A6, KLK5, DEFB132, ZNF208, TMCC3, PRR15, NKAIN1, SH3D19, GPRASP1, RAB19, SUPT3H, ARGFX
20521813	MIMAT0022274	hsa-miR-5580-3p	1.17	1.26	1.73	0.09	0.31	1.02	-1.47	0.214469	-1.38	0.222885	15	RASEF, TAS2R30, CT45A6, HIST1H2BN, LRP1B, ITGAM, GPC6, GDA, BICC1, ZNF208, SLIT3, SEMA3D, IFNE, SUPT3H, SH3D19
20521824	MIMAT0022285	hsa-miR-5585-5p	0.83	0.64	1.33	0.26	0.38	0.42	-1.42	0.401457	-1.61	0.296647	9	CLDN7, GPC6, TMCC3, INO80C, LETM2, GDA, GPRASP1, CACNB4, SH3D19
20521836	MIMAT0022297	hsa-miR-5589-5p	1.27	1.04	1.53	0.13	0.09	0.48	-1.2	0.864648	-1.41	0.512336	10	PRR15, NKAIN1, SLIT3, AC090616.2, RASEF, LETM2, HIST1H2BN, IFNE, ARGFX, SH3D19
20504283	MIMAT0003226	hsa-miR-562	0.92	1.07	0.67	0.21	0.11	0.28	1.19	0.360687	1.32	0.263591	9	GPC6, IFNE, NKAIN1, GPRASP1, ZNF208, GDA, TMCC3, CMC1, ARGFX
20537195	MI0019281	hsa-mir-5681a	1.12	0.93	0.81	0.34	0.14	0.07	1.24	0.252896	1.08	0.295141	19	NKAIN1, CACNB4, RP11-41O4.1, KLK5, GDA, TMCC3, SUPT3H, ITGAM, CYP4A11, HIST1H2BN, RAB19, AC090616.2, IFNE, GPRASP1, SLIT3, SH3D19, ARGFX, CMC1, GPC6
20537196	MI0019281	hsa-mir-5681a	1	1.1	0.67	0.2	0.18	0.22	1.26	0.387101	1.35	0.183897	19	NKAIN1, CACNB4, RP11-41O4.1, KLK5, GDA, TMCC3, SUPT3H, ITGAM, CYP4A11, HIST1H2BN, RAB19, AC090616.2, IFNE, GPRASP1, SLIT3, SH3D19, ARGFX, CMC1, GPC6
20522012	MIMAT0022469	hsa-miR-5681a	1.13	0.91	1.3	0.26	0.11	0.22	-1.13	0.426697	-1.31	0.070584	19	NKAIN1, CACNB4, RP11-41O4.1, KLK5, GDA, TMCC3, SUPT3H, ITGAM, CYP4A11, HIST1H2BN, RAB19, AC090616.2, IFNE, GPRASP1, SLIT3, SH3D19, ARGFX, CMC1, GPC6
20522022	MIMAT0022480	hsa-miR-5681b	1.04	1.2	1.49	0.26	0.55	0.28	-1.37	0.440346	-1.22	0.748581	9	CACNB4, C8orf4, BICC1, PCDHB13, IFNE, AC090616.2, RAB19, SH3D19, ARGFX
20537201	MI0019287	hsa-mir-5685	1.34	1.04	0.87	0.33	0.58	0.07	1.39	0.104961	1.13	0.323865	10	KLK5, CLDN7, CACNB4, RASEF, NKAIN1, C6orf222, TMCC3, RAB19, SUPT3H, ARGFX
20522040	MIMAT0022497	hsa-miR-5692b	1.23	0.88	0.8	0.26	0.1	0.41	1.35	0.557274	1.06	0.641547	18	SEMA3D, DEFB132, GPC6, BICC1, GDA, CACNB4, CT45A6, HIST1H2BN, AC090616.2, SLIT3, LRP1B, IFNE, GBP7, SUPT3H, C8orf4, CMC1, SH3D19, PON3
20537215	MI0019300	hsa-mir-5693	0.86	1.13	1.25	0.25	0.22	0.25	-1.31	0.220748	-1.09	0.621037	15	KRTAP10-3, NKAIN1, CLDN7, FSCN3, LETM2, SEMA3D, AKR7L, AC090616.2, RASEF, ITGAM, IFNE, CMC1, SH3D19, ARGFX, GPC6
20522028	MIMAT0022486	hsa-miR-5693	0.66	0.62	1.05	0.1	0.54	0.07	-1.3	0.064867	-1.34	0.759315	15	KRTAP10-3, NKAIN1, CLDN7, FSCN3, LETM2, SEMA3D, AKR7L, AC090616.2, RASEF, ITGAM, IFNE, CMC1, SH3D19, ARGFX, GPC6
20522031	MIMAT0022489	hsa-miR-5696	0.79	1.3	1.5	0.17	0.19	0.34	-1.63	0.073342	-1.15	0.165924	24	GLYATL2, APOBEC3G, LETM2, CACNB4, GPC6, DEFB132, GDA, HIST1H2BN, LRP1B, HOXD10, BICC1, SEMA3D, AKR7L, TMCC3, PRR15, C6orf222, SLIT3, SUPT3H, RAB19, SH3D19, CMC1, ARGFX, C8orf4, PON3
20537220	MI0019305	hsa-mir-5698	1.45	1.16	0.76	0.33	0.1	0.26	1.61	0.141199	1.32	0.288345	14	NKAIN1, SLIT3, PCDHB13, KLK5, CLEC4M, TMCC3, CYP4A11, SEMA3D, GPC6, ARGFX, IFNE, AKR7L, SH3D19, LETM2
20522039	MIMAT0022496	hsa-miR-5703	2.06	1.85	1.59	0.38	0.25	0.26	1.38	0.811854	1.2	0.918481	19	KRTAP10-11, IFNE, GLYATL2, NKAIN1, KRTAP10-3, RAB19, CYP4A11, LETM2, GDA, TMCC3, SLIT3, GPC6, HIST1H2BN, ZNF208, SUPT3H, LRRC4B, CMC1, ARGFX, PON3
20535315	MI0003582	hsa-mir-575	0.76	1.11	1.14	0.18	0.28	0.24	-1.3	0.085918	-1.02	0.889663	10	TMCC3, CACNB4, AC090616.2, C6orf222, SLIT3, RASEF, RAB19, SEMA3D, ARGFX, GPC6
20537238	MI0019797	hsa-mir-5787	1.74	1.32	1.3	0.6	0.36	0.24	1.35	0.482503	1.02	0.485375	12	LRRC4B, PGLYRP3, CLDN7, KRTAP10-3, NKAIN1, TMCC3, CACNB4, IFNE, HIST1H2BN, SLIT3, SH3D19, ARGFX
20535321	MI0003588	hsa-mir-581	1.21	1.38	0.92	0.17	0.54	0.19	1.22	0.062565	1.37	0.444266	10	GLYATL2, ITGAM, SEMA3D, ZNF208, UGT2A1, SH3D19, PCDHB13, SLIT3, UGT2A1, ARGFX
20504317	MIMAT0003252	hsa-miR-586	0.68	0.57	0.98	0.38	0.29	0.27	-1.23	0.724274	-1.33	0.6413	17	CT45A6, UGT2A1, C8orf4, NKAIN1, DEFB132, CYP4F2, CACNB4, ZNF208, SLIT3, IFNE, GPC6, GDA, SEMA3D, BICC1, LRP1B, UGT2A1, CMC1
20504318	MIMAT0003253	hsa-miR-587	1.25	1.01	0.8	0.25	0.1	0.25	1.36	0.325048	1.15	0.766541	17	CMC1, RASEF, GDA, LRRC4B, ZNF208, SH3D19, SEMA3D, SLIT3, CACNB4, C6orf222, TMCC3, BICC1, LRP1B, IFNE, AC090616.2, GPC6, SUPT3H
20504323	MIMAT0003256	hsa-miR-589-3p	4.49	3.88	4.69	0.15	0.12	0.8	-1.15	0.680658	-1.76	0.566768	10	RP11-41O4.1, C6orf222, HOXD10, NKAIN1, BICC1, RASEF, CACNB4, SLIT3, CMC1, PON3
20535336	MI0003603	hsa-mir-591	1.1	0.93	1.33	0.05	0.14	0.25	-1.17	0.213082	-1.32	0.025593	9	ZNF208, TMCC3, SH3D19, IFNE, LRP1B, BICC1, RASEF, RAB19, ARGFX
20504332	MIMAT0003263	hsa-miR-595	1.28	1.66	2.14	0.6	0.32	0.35	-1.82	0.42063	-1.39	0.073315	12	TRIM49, KRTAP10-11, HIST1H2BN, CLDN7, CACNB4, AC090616.2, ZNF208, TMCC3, SH3D19, GPC6, RAB19, CMC1
20504345	MIMAT0003273	hsa-miR-605-5p	1.3	0.87	1.32	0.21	0.25	0.14	-1.01	0.822617	-1.36	0.234982	9	KRTAP10-11, TMCC3, BICC1, SEMA3D, GPRASP1, PCDHB13, ZNF208, SH3D19, GPC6
20537247	MI0020351	hsa-mir-6074	1.5	0.86	0.84	0.19	0.16	0.2	1.58	0.003075	1.02	0.722424	17	PLCH1, LETM2, C8orf4, SEMA3D, ZNF208, GDA, RAB19, GPRASP1, CACNB4, BICC1, GPC6, LRP1B, TMCC3, IFNE, AC090616.2, SH3D19, PON3
20523006	MIMAT0023699	hsa-miR-6074	2.87	3.13	2.73	0.79	0.48	0.47	1.11	0.707023	1.33	0.042838	17	PLCH1, LETM2, C8orf4, SEMA3D, ZNF208, GDA, RAB19, GPRASP1, CACNB4, BICC1, GPC6, LRP1B, TMCC3, IFNE, AC090616.2, SH3D19, PON3
20537252	MI0020356	hsa-mir-6079	0.89	0.86	1.35	0.04	0.13	0.46	-1.37	0.551168	-1.4	0.446973	13	GDA, SMR3A, CLDN7, APOBEC3G, HIST1H2BN, ITGAM, LRRC4B, SLIT3, GPC6, GPRASP1, ZNF208, LRP1B, CMC1
20504349	MIMAT0003276	hsa-miR-608	0.99	0.91	1.41	0.13	0.16	0.37	-1.33	0.241016	-1.41	0.242099	13	NKAIN1, FSCN3, CLEC4M, TMCC3, CLDN7, CT45A6, SLIT3, CYP4A11, DEFB132, GDA, IFNE, ARGFX, CMC1
20523015	MIMAT0023708	hsa-miR-6083	1.25	1.1	0.84	0.04	0.39	0.23	1.32	0.068423	1.19	0.339447	20	GBP7, UGT2A1, PLCH1, CACNB4, ZNF208, GPC6, HIST1H2BN, SH3D19, AC090616.2, SLIT3, HOXD10, GDA, RASEF, LRP1B, SEMA3D, IFNE, C8orf4, SUPT3H, CMC1, UGT2A1
20523017	MIMAT0023710	hsa-miR-6085	5.96	6.16	6.56	0.36	0.13	0.8	-1.52	0.819589	-1.32	0.89823	9	LETM2, NKAIN1, KLK5, KRTAP10-11, SH3D19, TMCC3, DEFB132, PCDHB13, SUPT3H
20535359	MI0003625	hsa-mir-612	1.18	1.31	1.56	0.06	0.32	0.23	-1.3	0.165689	-1.18	0.606607	13	NKAIN1, SLIT3, RP11-41O4.1, ITGAM, TMCC3, C6orf222, RASEF, RAB19, GDA, SUPT3H, SH3D19, ARGFX, PON3
20524050	MIMAT0024613	hsa-miR-6129	0.72	0.82	1.36	0.13	0.25	0.48	-1.56	0.183588	-1.45	0.334599	11	NKAIN1, PGLYRP3, SLIT3, KRTAP10-11, LRRC4B, TMCC3, LRP1B, AC090616.2, CACNB4, HOXD10, SH3D19
20537271	MI0021275	hsa-mir-6130	0.96	1.16	1.4	0.09	0.05	0.13	-1.36	0.003227	-1.18	0.062303	11	NKAIN1, PGLYRP3, SLIT3, KRTAP10-11, LRRC4B, TMCC3, LRP1B, AC090616.2, CACNB4, HOXD10, SH3D19
20537273	MI0021277	hsa-mir-6132	1.06	1.02	0.79	0.28	0.11	0.15	1.21	0.044408	1.18	0.063684	9	PTH2, SLIT3, NKAIN1, GPC6, CLDN7, C8orf4, SH3D19, ZNF208, CACNB4
20537274	MI0021277	hsa-mir-6132	1.25	1.05	0.83	0.31	0.25	0.21	1.33	0.016607	1.16	0.307978	9	PTH2, SLIT3, NKAIN1, GPC6, CLDN7, C8orf4, SH3D19, ZNF208, CACNB4
20524053	MIMAT0024616	hsa-miR-6132	3.43	3.51	2.65	0.27	0.2	1.08	1.71	0.287956	1.81	0.351775	9	PTH2, SLIT3, NKAIN1, GPC6, CLDN7, C8orf4, SH3D19, ZNF208, CACNB4
20537275	MI0021278	hsa-mir-6133	1.26	1.03	0.81	0.31	0.24	0.15	1.36	0.279912	1.16	0.483348	11	NKAIN1, PGLYRP3, SLIT3, KRTAP10-11, LRRC4B, TMCC3, LRP1B, AC090616.2, CACNB4, HOXD10, SH3D19
20524054	MIMAT0024617	hsa-miR-6133	3.27	2.66	2.8	0.46	0.3	0.45	1.39	0.862075	-1.1	0.462153	11	NKAIN1, PGLYRP3, SLIT3, KRTAP10-11, LRRC4B, TMCC3, LRP1B, AC090616.2, CACNB4, HOXD10, SH3D19
20524055	MIMAT0024618	hsa-miR-6134	1.11	1.01	1.66	0.15	0.29	0.43	-1.46	0.231002	-1.57	0.360333	12	NKAIN1, CYP4A11, RAB19, TMCC3, IFNE, SLIT3, GDA, ZNF208, SUPT3H, RASEF, ARGFX, SH3D19
20504359	MIMAT0004805	hsa-miR-616-3p	1.21	1.46	2	0.15	0.51	0.15	-1.72	0.000522	-1.46	0.309496	12	HIST1H2BN, HOXD10, DEFB132, SEMA3D, TMCC3, GPC6, ZNF208, GDA, IFNE, PON3, ARGFX, CMC1
20504358	MIMAT0003284	hsa-miR-616-5p	1.17	2.18	1.34	0.25	0.68	0.28	-1.12	0.018341	1.79	0.505395	19	PGLYRP3, RASEF, SEMA3D, KRTAP10-11, RAB19, TMCC3, AKR7L, ZNF208, GDA, ITGAM, SH3D19, CACNB4, SLIT3, LRP1B, HIST1H2BN, NKAIN1, CMC1, ARGFX, GPC6
20537277	MI0021472	hsa-mir-6165	2.49	2.28	1.81	0.35	0.13	0.52	1.61	0.371076	1.39	0.261881	15	HOXD10, IFNA1, INO80C, KRTAP10-11, RASEF, SLIT3, CLEC4M, SH3D19, SEMA3D, GPC6, IFNE, CMC1, ARGFX, C8orf4, PON3
20504364	MIMAT0026622	hsa-miR-619-5p	6.39	6.44	7.03	0.18	0.13	0.47	-1.57	0.061916	-1.51	0.121494	15	LETM2, KLK5, DEFB132, TRIM49, BICC1, SLIT3, HIST1H2BN, RASEF, IFNE, SEMA3D, ZNF208, CACNB4, SUPT3H, SH3D19, ARGFX
20504369	MIMAT0003292	hsa-miR-623	1.29	1.56	0.97	0.13	0.53	0.44	1.25	0.44946	1.51	0.209571	11	CACNB4, GDA, TEX13A, BICC1, SLIT3, SH3D19, AC090616.2, ZNF208, IFNE, TMCC3, ITGAM
20535381	MI0003647	hsa-mir-632	1.08	0.88	1.5	0.27	0.6	0.32	-1.34	0.286833	-1.54	0.575886	12	C6orf222, DEFB132, GPC6, LRP1B, ZNF208, UGT2A1, UGT2A1, GDA, SEMA3D, PON3, CACNB4, CMC1
20504387	MIMAT0003304	hsa-miR-634	1.09	1.32	0.94	0.1	0.18	0.16	1.11	0.155305	1.3	0.001755	9	CT45A6, C6orf222, CLEC4M, LETM2, NKAIN1, DEFB132, IFNE, SH3D19, PON3
20535384	MI0003650	hsa-mir-635	0.85	0.9	1.23	0.05	0.14	0.34	-1.31	0.264979	-1.26	0.180886	10	AKR7L, C6orf222, SLIT3, CACNB4, HIST1H2BN, IFNE, FSCN3, GPC6, GDA, CMC1
20504388	MIMAT0003305	hsa-miR-635	1.36	1.1	0.96	0.18	0.05	0.22	1.32	0.033434	1.1	0.500303	10	AKR7L, C6orf222, SLIT3, CACNB4, HIST1H2BN, IFNE, FSCN3, GPC6, GDA, CMC1
20504389	MIMAT0003306	hsa-miR-636	2.21	3.24	1.44	0.44	0.94	0.72	1.71	0.467738	3.47	0.097889	13	CACNB4, HOXD10, DEFB132, SH3D19, RASEF, LRP1B, TMCC3, C6orf222, SLIT3, SUPT3H, IFNE, ARGFX, PON3
20535389	MI0003655	hsa-mir-640	1.46	1.17	1	0.32	0.24	0.17	1.38	0.037988	1.12	0.05501	9	CYP4A11, HIST1H2BN, BICC1, ZNF208, RASEF, TMCC3, SLIT3, IFNE, CMC1
20504394	MIMAT0003311	hsa-miR-641	1.64	2.26	2.93	0.91	0.33	0.4	-2.44	0.20595	-1.59	0.123812	12	DEFB132, TRIM49, CLEC4M, C8orf4, HOXD10, CACNB4, HIST1H2BN, RASEF, C6orf222, GPC6, SLIT3, CMC1
20518721	MIMAT0018444	hsa-miR-642b-3p	3.28	3.8	4.47	0.21	0.13	0.56	-2.28	0.122711	-1.59	0.425921	13	GPC6, BICC1, CYP4A11, TMCC3, KRTAP10-11, IFNE, SEMA3D, CACNB4, SUPT3H, SLIT3, C8orf4, ARGFX, PON3
20535397	MI0003662	hsa-mir-647	0.96	1.36	0.97	0.08	0.34	0.16	-1.01	0.830072	1.31	0.059444	9	DEFB132, FSCN3, NKAIN1, PGLYRP3, IFNE, GPC6, SLIT3, CMC1, SH3D19
20504401	MIMAT0003317	hsa-miR-647	1.19	0.98	1.4	0.08	0.24	0.53	-1.16	0.406984	-1.34	0.353543	9	DEFB132, FSCN3, NKAIN1, PGLYRP3, IFNE, GPC6, SLIT3, CMC1, SH3D19
20525000	MIMAT0025455	hsa-miR-6500-3p	2.09	1.53	1.93	0.43	0.44	0.26	1.12	0.965801	-1.32	0.248123	11	SH3D19, C8orf4, HOXD10, CYP4F2, IFNE, SLIT3, RAB19, C6orf222, CACNB4, CMC1, ARGFX
20525005	MIMAT0025460	hsa-miR-6502-5p	0.67	1.33	0.77	0.41	0.42	0.22	-1.07	0.785366	1.48	0.1998	11	AC090616.2, GDA, HOXD10, C6orf222, PCDHB13, SH3D19, NKAIN1, RAB19, LRP1B, SUPT3H, CMC1
20525011	MIMAT0025466	hsa-miR-6505-5p	1.16	1.35	1.62	0.22	0.21	0.29	-1.38	0.295005	-1.21	0.450722	11	CYP4F2, GPC6, PCDHB13, ITGAM, GDA, SEMA3D, SH3D19, CACNB4, IFNE, SUPT3H, CMC1
20525021	MIMAT0025476	hsa-miR-6510-5p	4.35	4.2	3.87	0.16	0.49	0.31	1.4	0.484272	1.26	0.790743	14	IFNA1, CLEC4M, PGLYRP3, UGT2A1, C6orf222, RASEF, HOXD10, GPC6, TMCC3, SLIT3, SEMA3D, UGT2A1, C8orf4, PON3
20525387	MIMAT0025848	hsa-miR-6511b-3p	3.04	3.61	3.86	0.78	0.51	0.58	-1.76	0.425152	-1.19	0.729624	9	HOXD10, LETM2, ZNF208, DEFB132, AKR7L, NKAIN1, IFNE, CMC1, ARGFX
20525028	MIMAT0025483	hsa-miR-6513-3p	1.04	1.04	0.64	0.17	0.12	0.23	1.32	0.358647	1.32	0.090062	11	RASEF, TMCC3, SH3D19, GDA, LETM2, NKAIN1, ZNF208, C6orf222, PCDHB13, CMC1, PON3
20525032	MIMAT0025487	hsa-miR-6515-3p	1	0.96	1.45	0.2	0.32	0.2	-1.36	0.454176	-1.41	0.368728	14	ZNF208, SLIT3, TMCC3, GBP7, GDA, BICC1, CYP4F2, SH3D19, C6orf222, KRTAP10-11, LRRC4B, GPC6, IFNE, CMC1
20525031	MIMAT0025486	hsa-miR-6515-5p	1.31	1.38	1.93	0.49	0.35	0.41	-1.54	0.005061	-1.47	0.273348	11	NKAIN1, INO80C, KRTAP10-3, CLEC4M, DEFB132, CYP4A11, ZNF208, ANXA9, SUPT3H, C6orf222, ARGFX
20529134	MIMAT0030417	hsa-miR-6516-5p	3.47	2.76	3.72	0.52	0.52	0.4	-1.19	0.700015	-1.95	0.316056	14	TEX13A, IFNE, CLEC4M, TMCC3, DEFB132, GPC6, CACNB4, SH3D19, RAB19, PCDHB13, HIST1H2BN, ZNF208, CMC1, ARGFX
20504430	MIMAT0003337	hsa-miR-659-3p	1.05	1.36	1.62	0.41	0.02	0.38	-1.48	0.040762	-1.2	0.35162	15	SEMA3D, LETM2, SH3D19, RAB19, C8orf4, DEFB132, GDA, AC090616.2, CACNB4, IFNE, HIST1H2BN, GPC6, SUPT3H, CMC1, ARGFX
20504432	MIMAT0022711	hsa-miR-660-3p	1.17	1.13	1.83	0.33	0.52	0.56	-1.58	0.611317	-1.63	0.90454	12	CT45A6, BICC1, DEFB132, C6orf222, ZNF208, LETM2, AKR7L, SLIT3, GPC6, RAB19, CMC1, SH3D19
20506896	MIMAT0005948	hsa-miR-664a-5p	3.98	3.61	3.08	0.91	0.88	0.88	1.87	0.466133	1.45	0.369627	11	ZNF208, GDA, DEFB132, RAB19, GPC6, LRP1B, C6orf222, IFNE, SLIT3, CMC1, SH3D19
20521811	MIMAT0022272	hsa-miR-664b-3p	4.74	4.31	4.13	0.73	0.66	0.69	1.52	0.543769	1.13	0.738936	26	HOXD10, CACNB4, APOBEC3G, PRR15, DEFB132, GLYATL2, GPC6, LETM2, HIST1H2BN, GDA, ZNF208, TMCC3, BICC1, SLIT3, IFNE, SEMA3D, C6orf222, AKR7L, LRP1B, RAB19, SUPT3H, SH3D19, CMC1, C8orf4, ARGFX, PON3
20525390	MIMAT0027345	hsa-miR-6720-5p	1.48	0.85	0.83	0.23	0.17	0.28	1.57	0.1209	1.02	0.666415	15	CLEC4M, C8orf4, ANXA9, RAB19, C6orf222, TMCC3, IFNE, GDA, HIST1H2BN, CACNB4, RASEF, SLIT3, SH3D19, CMC1, ARGFX
20525392	MIMAT0025852	hsa-miR-6721-5p	1.74	2.11	1.69	0.22	0.54	0.79	1.03	0.953662	1.34	0.35921	14	CYP4A11, KRTAP10-3, NKAIN1, GPC6, SLIT3, SH3D19, TMCC3, LRRC4B, AKR7L, HIST1H2BN, C6orf222, ITGAM, RAB19, IFNE
20525394	MIMAT0025854	hsa-miR-6722-3p	6.49	6.37	6.78	0.06	0.25	0.86	-1.22	0.809285	-1.33	0.808858	11	IFNA1, PGLYRP3, SH3D19, CACNB4, CLDN7, GDA, SLIT3, C8orf4, GPC6, NKAIN1, ZNF208
20525419	MIMAT0027358	hsa-miR-6728-3p	1.65	1.07	1.69	0.45	0.22	0.18	-1.03	0.749288	-1.53	0.122969	11	GPC6, APOBEC3G, CYP4A11, NKAIN1, IFNE, ZNF208, SLIT3, SUPT3H, CACNB4, TMCC3, PON3
20525424	MIMAT0027363	hsa-miR-6731-5p	1.04	0.71	1.15	0.09	0.84	0.46	-1.08	0.772192	-1.36	0.954445	17	NKAIN1, KRTAP10-3, AKR7L, UGT2A1, GDA, CYP4A11, UGT2A1, C6orf222, LRRC4B, HIST1H2BN, SLIT3, RAB19, IFNE, SUPT3H, ZNF208, ARGFX, PON3
20525427	MIMAT0027366	hsa-miR-6732-3p	1.24	1.16	1.71	0.41	0.23	0.13	-1.39	0.49655	-1.47	0.096368	13	LETM2, SH3D19, AKR7L, GDA, GPC6, AC090616.2, SEMA3D, RAB19, SLIT3, SUPT3H, CMC1, ARGFX, C8orf4
20525430	MIMAT0027369	hsa-miR-6734-5p	1.65	2.63	1.91	0.29	0.73	0.26	-1.2	0.029272	1.65	0.44088	9	ANXA9, LRRC4B, GPC6, SLIT3, RASEF, ZNF208, DEFB132, SUPT3H, ARGFX
20525436	MIMAT0027375	hsa-miR-6737-5p	2.19	2.37	2.57	0.25	0.5	0.45	-1.3	0.931238	-1.15	0.365007	16	DEFB132, CT45A6, NKAIN1, CYP4A11, PRR15, TMCC3, CYP4F2, GDA, FSCN3, CLDN7, SLIT3, CACNB4, GPC6, SEMA3D, IFNE, CMC1
20525442	MIMAT0027381	hsa-miR-6740-5p	2.26	2.13	2.75	0.36	0.55	0.68	-1.4	0.625987	-1.53	0.389414	17	PRR15, GDA, LRRC4B, CYP4A11, C8orf4, DEFB132, GPC6, UGT2A1, AKR7L, C6orf222, IFNE, SH3D19, ZNF208, PON3, CMC1, ARGFX, UGT2A1
20525444	MIMAT0027383	hsa-miR-6741-5p	4.22	4.09	4.57	0.52	0.66	0.66	-1.27	0.983868	-1.4	0.725159	11	RAB19, GLYATL2, LETM2, NKAIN1, CACNB4, ZNF208, GDA, SLIT3, SUPT3H, SEMA3D, PON3
20525446	MIMAT0027385	hsa-miR-6742-5p	1.54	1.23	1.61	0.41	0.29	0.5	-1.05	0.844485	-1.3	0.567984	12	ANXA9, CYP4F2, KLK5, NKAIN1, CYP4A11, LRRC4B, CLDN7, CLEC4M, AKR7L, SLIT3, TMCC3, ARGFX
20525452	MIMAT0027391	hsa-miR-6745	0.96	0.88	1.3	0.33	0.28	0.27	-1.27	0.298784	-1.34	0.320013	15	NKAIN1, CYP4A11, SMR3A, GDA, CLEC4M, TMCC3, LRRC4B, C6orf222, LETM2, SLIT3, ZNF208, RAB19, SEMA3D, SH3D19, CMC1
20525456	MIMAT0027395	hsa-miR-6747-3p	3.53	3.26	2.92	1.13	1.07	0.59	1.53	0.521642	1.27	0.743653	14	PRR15, DEFB132, NKAIN1, LETM2, CT45A6, TMCC3, SLIT3, RAB19, HIST1H2BN, SUPT3H, IFNE, SH3D19, CMC1, ARGFX
20525458	MIMAT0027397	hsa-miR-6748-3p	1.26	1.51	1.63	0.6	0.36	0.29	-1.3	0.671267	-1.09	0.718637	10	C8orf4, LRRC4B, TEX13A, GDA, AKR7L, SEMA3D, GPRASP1, ITGAM, ARGFX, SH3D19
20525457	MIMAT0027396	hsa-miR-6748-5p	2	1.67	1.43	0.31	0.49	0.88	1.48	0.843195	1.18	0.766536	12	SMR3A, RAB19, CLEC4M, CYP4A11, NKAIN1, KRTAP10-11, HOXD10, PCDHB13, SLIT3, RASEF, CMC1, SH3D19
20525464	MIMAT0027403	hsa-miR-6751-3p	1.49	1.24	1.11	0.31	0.26	0.39	1.31	0.965442	1.1	0.870715	9	PGLYRP3, TMCC3, RASEF, GDA, SLIT3, IFNE, SUPT3H, NKAIN1, ARGFX
20525465	MIMAT0027404	hsa-miR-6752-5p	7.14	7.01	6.69	0.1	0.1	0.37	1.36	0.409179	1.24	0.682841	11	CYP4A11, CLEC4M, DEFB132, FSCN3, GPC6, PRR15, NKAIN1, LRRC4B, CLDN7, TMCC3, ARGFX
20525468	MIMAT0027407	hsa-miR-6753-3p	2.03	1.02	1.67	0.74	0.65	1.4	1.29	0.384412	-1.57	0.4087	11	GDA, GPC6, AC090616.2, AKR7L, ITGAM, GPRASP1, SUPT3H, IFNE, SLIT3, PON3, BICC1
20525469	MIMAT0027408	hsa-miR-6754-5p	2.32	3.98	3.24	0.76	0.56	1.32	-1.89	0.655563	1.67	0.16333	11	NKAIN1, SLIT3, UGT2A1, KLK5, CYP4A11, RASEF, SH3D19, HIST1H2BN, UGT2A1, ARGFX, PON3
20525489	MIMAT0027428	hsa-miR-6764-5p	1.07	1.09	1.44	0.32	0.26	0.4	-1.3	0.368553	-1.27	0.040738	12	KLK5, CLDN7, NKAIN1, ANXA9, SLIT3, CLEC4M, GDA, C6orf222, ZNF208, IFNE, ARGFX, PON3
20525501	MIMAT0027440	hsa-miR-6770-5p	1.77	1.04	1.5	0.43	0.32	0.06	1.21	0.37681	-1.38	0.350978	16	GLYATL2, TMCC3, KLK5, CYP4A11, KRTAP10-11, AC090616.2, HIST1H2BN, RASEF, NKAIN1, IFNE, SLIT3, ZNF208, SUPT3H, GPC6, CMC1, PON3
20525509	MIMAT0027448	hsa-miR-6774-5p	2.79	2.38	2.34	0.36	0.34	0.3	1.37	0.387294	1.03	0.692014	10	AKR7L, C6orf222, SLIT3, CACNB4, HIST1H2BN, IFNE, FSCN3, GPC6, GDA, CMC1
20525530	MIMAT0027469	hsa-miR-6784-3p	0.97	0.9	1.39	0.28	0.62	0.25	-1.34	0.241297	-1.41	0.636324	11	HOXD10, DEFB132, SLIT3, LETM2, AKR7L, NKAIN1, ZNF208, IFNE, SH3D19, CMC1, ARGFX
20525531	MIMAT0027470	hsa-miR-6785-5p	3.83	3.7	4.32	0.22	0.38	0.42	-1.4	0.126088	-1.54	0.30442	13	LRRC4B, PGLYRP3, GPC6, SLIT3, CYP4A11, C6orf222, RAB19, HIST1H2BN, IFNE, TMCC3, ZNF208, ARGFX, SH3D19
20525536	MIMAT0027475	hsa-miR-6787-3p	1.38	1.27	1.68	0.25	0.32	0.37	-1.23	0.711659	-1.33	0.353431	10	DEFB132, CYP4A11, LETM2, AKR7L, SLIT3, GDA, GPRASP1, ZNF208, RASEF, ARGFX
20525541	MIMAT0027480	hsa-miR-6790-5p	3.18	3.91	3.25	0.26	0.07	1.6	-1.05	0.864256	1.58	0.420739	11	DEFB132, NKAIN1, GDA, CACNB4, SH3D19, SEMA3D, SLIT3, ZNF208, SUPT3H, CMC1, GPC6
20525544	MIMAT0027483	hsa-miR-6791-3p	0.9	0.54	0.98	0.25	0.38	0.27	-1.06	0.666056	-1.36	0.018768	9	RP11-41O4.1, LETM2, TMCC3, BICC1, CACNB4, IFNE, SH3D19, SLIT3, GDA
20525550	MIMAT0027489	hsa-miR-6794-3p	1.28	1	1.39	0.37	0.18	0.19	-1.08	0.692651	-1.31	0.0547	11	TRIM49, RASEF, SH3D19, LRP1B, SEMA3D, IFNE, CACNB4, SLIT3, SUPT3H, GPRASP1, CMC1
20525553	MIMAT0027492	hsa-miR-6796-5p	2.2	1.96	2.57	0.19	0.24	0.35	-1.3	0.510752	-1.53	0.206881	14	ANXA9, CLEC4M, KLK5, SMR3A, CYP4A11, AKR7L, LRRC4B, KRTAP10-11, HOXD10, NKAIN1, RASEF, SLIT3, ARGFX, CMC1
20525555	MIMAT0027494	hsa-miR-6797-5p	2.77	1.55	2.8	0.56	0.76	0.62	-1.02	0.202399	-2.38	0.199775	11	INO80C, NKAIN1, KRTAP10-3, PGLYRP3, ANXA9, SLIT3, CYP4A11, LRRC4B, HIST1H2BN, SUPT3H, ARGFX
20525557	MIMAT0027496	hsa-miR-6798-5p	4.83	4.6	4.32	0.38	0.28	0.72	1.42	0.45166	1.22	0.567	9	NKAIN1, TMCC3, GPC6, SLIT3, CYP4F2, CACNB4, KLK5, PRR15, CMC1
20525565	MIMAT0027504	hsa-miR-6802-5p	2.44	3.62	4.11	0.54	0.3	1.33	-3.17	0.387243	-1.4	0.698462	9	AKR7L, HIST1H2BN, C6orf222, ZNF208, BICC1, GDA, SUPT3H, C8orf4, LRRC4B
20525575	MIMAT0027514	hsa-miR-6807-5p	1.98	1.36	1.2	0.81	0.84	1.34	1.72	0.878121	1.12	0.696776	14	DEFB132, PGLYRP3, AKR7L, SH3D19, TMCC3, ZNF208, ITGAM, RASEF, SLIT3, NKAIN1, RAB19, IFNE, CMC1, ARGFX
20525577	MIMAT0027516	hsa-miR-6808-5p	4.41	3.95	4.75	0.15	0.21	0.25	-1.27	0.358025	-1.74	0.057912	16	CYP4A11, CT45A6, SLIT3, UGT2A1, PRR15, LETM2, HIST1H2BN, IFNE, RAB19, NKAIN1, ZNF208, GPC6, SUPT3H, ARGFX, SH3D19, UGT2A1
20525584	MIMAT0027523	hsa-miR-6811-3p	1.7	1	1.86	0.64	0.86	0.47	-1.12	0.899165	-1.81	0.28836	11	DEFB132, GBP7, GDA, TMCC3, RASEF, NKAIN1, GPC6, RAB19, SLIT3, CMC1, SH3D19
20525587	MIMAT0027526	hsa-miR-6813-5p	2.89	2.09	2.26	0.5	1.26	1.04	1.54	0.425442	-1.13	0.906877	9	LETM2, NKAIN1, KLK5, KRTAP10-11, SH3D19, TMCC3, DEFB132, PCDHB13, SUPT3H
20525600	MIMAT0027539	hsa-miR-6819-3p	0.94	1.31	0.79	0.09	0.32	0.23	1.11	0.155896	1.43	0.010203	9	CT45A6, GPC6, C8orf4, C6orf222, RAB19, IFNE, CMC1, PON3, ARGFX
20525602	MIMAT0027541	hsa-miR-6820-3p	1	1.4	0.9	0.22	0.44	0.32	1.07	0.697913	1.41	0.277572	12	AC090616.2, CACNB4, KRTAP10-3, GBP7, ITGAM, SEMA3D, IFNE, SLIT3, BICC1, LRP1B, SH3D19, PON3
20525607	MIMAT0027546	hsa-miR-6823-5p	1.52	2.23	3.03	0.41	0.86	1.02	-2.85	0.135044	-1.74	0.759062	16	C6orf222, KLK5, GDA, LETM2, ZNF208, GPC6, AKR7L, NKAIN1, IFNE, TMCC3, HIST1H2BN, SEMA3D, CYP4A11, CMC1, ARGFX, SH3D19
20525611	MIMAT0027550	hsa-miR-6825-5p	2.07	1.79	1.12	0.65	0.66	0.82	1.93	0.795218	1.59	0.817179	12	SLIT3, KRTAP10-11, PGLYRP3, AC090616.2, RASEF, CACNB4, SH3D19, HIST1H2BN, TMCC3, GDA, AKR7L, LETM2
20525619	MIMAT0027558	hsa-miR-6829-5p	2.55	2.99	2.59	0.2	0.69	0.21	-1.03	0.972674	1.32	0.988335	9	KRTAP10-3, NKAIN1, RASEF, LRRC4B, SLIT3, TMCC3, PON3, IFNE, CMC1
20525628	MIMAT0027567	hsa-miR-6833-3p	1.32	1.38	0.89	0.25	0.38	0.11	1.35	0.18809	1.41	0.359029	19	ZNF208, CT45A6, C8orf4, AKR7L, DEFB132, BICC1, GPC6, CACNB4, SLIT3, TMCC3, SEMA3D, RAB19, GDA, GPRASP1, IFNE, C6orf222, HIST1H2BN, SH3D19, PON3
20525627	MIMAT0027566	hsa-miR-6833-5p	1.3	1.74	1.25	0.15	0.2	0.32	1.03	0.835355	1.4	0.530447	11	TAS2R30, DEFB132, NKAIN1, GPC6, C6orf222, CYP4F2, SEMA3D, CACNB4, CMC1, C8orf4, ARGFX
20525629	MIMAT0027568	hsa-miR-6834-5p	1.27	1.39	1.67	0.07	0.1	0.45	-1.32	0.207778	-1.21	0.392972	11	KRTAP10-11, LRRC4B, TMCC3, SLIT3, RASEF, ZNF208, AC090616.2, NKAIN1, SUPT3H, LRP1B, ARGFX
20525635	MIMAT0027574	hsa-miR-6836-5p	3.29	2.24	2.78	0.59	0.49	0.43	1.43	0.3329	-1.45	0.013705	9	PTH2, SLIT3, NKAIN1, GPC6, CLDN7, C8orf4, SH3D19, ZNF208, CACNB4
20525637	MIMAT0027576	hsa-miR-6837-5p	2.65	2.43	2.92	0.42	0.15	0.42	-1.2	0.550513	-1.4	0.641616	11	CYP4A11, ZNF208, PRR15, NKAIN1, SLIT3, KRTAP10-11, C6orf222, HIST1H2BN, TMCC3, DEFB132, ARGFX
20525656	MIMAT0027595	hsa-miR-6847-3p	1.66	1.41	1.26	0.33	0.14	0.27	1.32	0.104809	1.11	0.772672	9	FSCN3, GDA, SH3D19, LRP1B, HIST1H2BN, ZNF208, RAB19, CMC1, ARGFX
20525655	MIMAT0027594	hsa-miR-6847-5p	1.64	1.95	2.37	0.55	0.79	0.72	-1.66	0.131502	-1.34	0.915538	12	GLYATL2, AC090616.2, DEFB132, KRTAP10-3, RAB19, RASEF, TMCC3, LRP1B, NKAIN1, SEMA3D, CACNB4, SH3D19
20525657	MIMAT0027596	hsa-miR-6848-5p	4.65	4.48	4.92	0.23	0.17	0.47	-1.21	0.867003	-1.35	0.778384	9	NKAIN1, KRTAP10-11, GDA, SLIT3, ITGAM, TMCC3, ZNF208, LRRC4B, ARGFX
20525660	MIMAT0027599	hsa-miR-6849-3p	2.24	1.53	1.19	0.36	0.47	0.24	2.07	0.062529	1.27	0.305851	15	C8orf4, CLEC4M, ANXA9, NKAIN1, RAB19, IFNE, TMCC3, CLDN7, SLIT3, C6orf222, HIST1H2BN, SH3D19, ARGFX, CMC1, PON3
20525663	MIMAT0027602	hsa-miR-6851-5p	2.32	1.92	1.91	0.22	0.27	0.47	1.33	0.361613	1	0.910932	13	NKAIN1, KRTAP10-3, SLIT3, TEX13A, ITGAM, CYP4A11, ZNF208, SH3D19, RAB19, HIST1H2BN, SUPT3H, ARGFX, PON3
20525665	MIMAT0027604	hsa-miR-6852-5p	0.99	0.79	1.2	0.26	0.09	0.39	-1.16	0.112844	-1.32	0.274196	16	FSCN3, TRIM49, CYP4A11, SEMA3D, LETM2, AC090616.2, C6orf222, LRRC4B, ITGAM, CACNB4, SLIT3, RASEF, NKAIN1, IFNE, CMC1, PON3
20525669	MIMAT0027608	hsa-miR-6854-5p	0.92	1.11	1.66	0.33	0.26	0.35	-1.68	0.241628	-1.46	0.624609	13	NKAIN1, KRTAP10-3, RP11-41O4.1, GDA, CLDN7, TMCC3, C6orf222, SEMA3D, SH3D19, AKR7L, RAB19, IFNE, ARGFX
20537606	MI0022707	hsa-mir-6860	3.08	3.68	3.54	0.23	0.23	0.13	-1.37	0.068211	1.11	0.660735	13	NKAIN1, SLIT3, RP11-41O4.1, ITGAM, TMCC3, C6orf222, RASEF, RAB19, GDA, SUPT3H, SH3D19, ARGFX, PON3
20525683	MIMAT0027622	hsa-miR-6860	4.25	4.07	4.54	0.17	0.58	1.07	-1.22	0.536885	-1.39	0.545102	13	NKAIN1, SLIT3, RP11-41O4.1, ITGAM, TMCC3, C6orf222, RASEF, RAB19, GDA, SUPT3H, SH3D19, ARGFX, PON3
20525684	MIMAT0027623	hsa-miR-6861-5p	2.47	3.36	3.72	0.37	0.89	0.54	-2.36	0.299752	-1.28	0.502479	12	FSCN3, PRR15, NKAIN1, C6orf222, SLIT3, LETM2, PCDHB13, AC090616.2, TMCC3, CACNB4, CMC1, SH3D19
20525686	MIMAT0027625	hsa-miR-6862-5p	1.8	1.19	1.78	0.33	0.8	0.35	1.02	0.965003	-1.5	0.899039	15	DEFB132, PTH2, ITGAM, C8orf4, LETM2, CYP4A11, SLIT3, ZNF208, TMCC3, BICC1, RASEF, PCDHB13, HIST1H2BN, RAB19, CMC1
20525690	MIMAT0027629	hsa-miR-6864-3p	1.74	0.9	0.99	0.6	0.38	0.1	1.69	0.363666	-1.06	0.733447	16	TRIM49, RP11-41O4.1, GPC6, KRTAP10-11, DEFB132, C6orf222, KLK5, SEMA3D, TMCC3, CACNB4, HIST1H2BN, SLIT3, RAB19, C8orf4, ARGFX, SH3D19
20525695	MIMAT0027634	hsa-miR-6867-5p	2.05	3.01	3.57	0.48	1.38	0.83	-2.87	0.218074	-1.48	0.938979	13	ITGAM, NKAIN1, TMCC3, AKR7L, SH3D19, SEMA3D, GPC6, SLIT3, ZNF208, GPRASP1, PCDHB13, CMC1, ARGFX
20525698	MIMAT0027637	hsa-miR-6868-3p	0.91	0.61	1.06	0.3	0.21	0.27	-1.11	0.079652	-1.37	0.027382	16	DEFB132, SLIT3, GDA, BICC1, IFNE, TMCC3, ZNF208, SEMA3D, RAB19, NKAIN1, SH3D19, SUPT3H, RASEF, CACNB4, CMC1, ARGFX
20525701	MIMAT0027640	hsa-miR-6870-5p	2.85	3.74	4.01	0.05	1.04	0.45	-2.23	0.03848	-1.2	0.572555	14	NKAIN1, SLIT3, PCDHB13, KLK5, CLEC4M, TMCC3, CYP4A11, SEMA3D, GPC6, ARGFX, IFNE, AKR7L, SH3D19, LETM2
20525706	MIMAT0027645	hsa-miR-6872-3p	1.88	1.58	1.35	0.72	0.14	0.21	1.44	0.171361	1.17	0.057674	13	NKAIN1, CLEC4M, LETM2, RASEF, SH3D19, AC090616.2, SEMA3D, HIST1H2BN, IFNE, GPRASP1, GPC6, LRP1B, ARGFX
20525708	MIMAT0027647	hsa-miR-6873-3p	1.4	1.12	0.9	0.49	0.24	0.75	1.41	0.900709	1.16	0.635351	17	ZNF208, GPC6, CACNB4, HIST1H2BN, AKR7L, BICC1, TMCC3, C8orf4, CT45A6, DEFB132, SLIT3, NKAIN1, RAB19, SEMA3D, IFNE, SH3D19, PON3
20525707	MIMAT0027646	hsa-miR-6873-5p	1.55	1.32	1.15	0.36	0.31	0.36	1.32	0.648894	1.13	0.716081	11	SLIT3, LETM2, C6orf222, NKAIN1, SEMA3D, TMCC3, HIST1H2BN, RASEF, CACNB4, HOXD10, SH3D19
20525712	MIMAT0027651	hsa-miR-6875-3p	1.29	1.42	2.1	0.38	0.33	1.43	-1.74	0.467059	-1.59	0.561479	14	BICC1, AKR7L, PRR15, SEMA3D, GPC6, SLIT3, ZNF208, TMCC3, HIST1H2BN, SH3D19, ARGFX, CMC1, PON3, DEFB132
20525716	MIMAT0027655	hsa-miR-6877-3p	1.42	1.21	1.92	0.5	0.61	1.44	-1.42	0.460661	-1.64	0.16462	9	CT45A6, GPC6, C8orf4, C6orf222, RAB19, IFNE, CMC1, PON3, ARGFX
20525727	MIMAT0027666	hsa-miR-6883-5p	1.77	2.39	1.81	0.53	0.75	0.47	-1.03	0.706254	1.5	0.815694	13	LRRC4B, PGLYRP3, GPC6, SLIT3, CYP4A11, C6orf222, RAB19, HIST1H2BN, IFNE, TMCC3, ZNF208, ARGFX, SH3D19
20525741	MIMAT0027680	hsa-miR-6890-5p	3.95	4.67	3.37	0.89	1.06	0.91	1.49	0.944482	2.46	0.753248	10	CACNB4, KLK5, GDA, TMCC3, LETM2, SLIT3, IFNE, LRP1B, SUPT3H, CMC1
20525747	MIMAT0027686	hsa-miR-6893-5p	3.19	4.31	4.13	0.58	0.8	0.18	-1.91	0.140013	1.14	0.671321	16	CYP4A11, CT45A6, SLIT3, UGT2A1, PRR15, LETM2, HIST1H2BN, IFNE, RAB19, NKAIN1, ZNF208, GPC6, SUPT3H, ARGFX, SH3D19, UGT2A1
20500437	MIMAT0004554	hsa-miR-7-2-3p	0.89	1.04	1.58	0.14	0.21	0.56	-1.61	0.134968	-1.46	0.256491	21	LETM2, RP11-41O4.1, HIST1H2BN, CACNB4, SEMA3D, LRP1B, BICC1, GPC6, RASEF, C6orf222, SLIT3, GDA, GPRASP1, IFNE, TMCC3, ZNF208, AC090616.2, SUPT3H, PON3, CMC1, ARGFX
20526173	MIMAT0028112	hsa-miR-7107-3p	0.97	1.49	0.75	0.11	0.3	0.06	1.16	0.022542	1.67	0.047022	11	GDA, GPC6, AC090616.2, AKR7L, ITGAM, GPRASP1, SUPT3H, IFNE, SLIT3, PON3, BICC1
20526177	MIMAT0028116	hsa-miR-7109-3p	1.95	2.66	2.53	0.55	0.58	0.05	-1.5	0.197214	1.1	0.709996	9	ZNF208, GPC6, TMCC3, IFNE, AC090616.2, GDA, BICC1, SUPT3H, CMC1
20526178	MIMAT0028117	hsa-miR-7110-5p	5.26	5.13	4.85	0.2	0.14	0.4	1.33	0.312023	1.22	0.830504	11	CYP4A11, CLEC4M, DEFB132, FSCN3, GPC6, PRR15, NKAIN1, LRRC4B, CLDN7, TMCC3, ARGFX
20526181	MIMAT0028120	hsa-miR-7111-3p	1.02	1.07	1.81	0.25	0.15	0.27	-1.73	0.057459	-1.67	0.014257	14	GDA, NKAIN1, SLIT3, GPC6, APOBEC3G, HIST1H2BN, GPRASP1, RASEF, LRRC4B, SH3D19, TMCC3, PCDHB13, CMC1, PON3
20526180	MIMAT0028119	hsa-miR-7111-5p	3.95	3.73	4.79	0.4	0.35	0.1	-1.79	0.12008	-2.08	0.062632	14	NKAIN1, SLIT3, PCDHB13, KLK5, CLEC4M, TMCC3, CYP4A11, SEMA3D, GPC6, ARGFX, IFNE, AKR7L, SH3D19, LETM2
20526185	MIMAT0028124	hsa-miR-7113-3p	1.38	1.21	0.91	0.27	0.27	0.17	1.39	0.17491	1.24	0.176341	11	C8orf4, DEFB132, CLDN7, UGT2A1, SLIT3, RAB19, TMCC3, IFNE, CMC1, UGT2A1, PON3
20526186	MIMAT0028125	hsa-miR-7114-5p	2.11	3.57	3.18	0.33	1.09	0.48	-2.11	0.015799	1.3	0.566878	13	DEFB132, NKAIN1, CYP4F2, CACNB4, RP11-41O4.1, LRRC4B, KRTAP10-11, GDA, SH3D19, TMCC3, IFNE, CMC1, ARGFX
20526863	MIMAT0028213	hsa-miR-7151-3p	1.67	2.8	2.44	0.45	0.14	0.89	-1.71	0.171066	1.28	0.683603	14	LETM2, NKAIN1, FSCN3, HIST1H2BN, BICC1, IFNE, RASEF, ZNF208, AKR7L, PCDHB13, TMCC3, SH3D19, CMC1, ARGFX
20526862	MIMAT0028212	hsa-miR-7151-5p	0.89	1.51	1.28	0.21	0.57	0.28	-1.3	0.383989	1.18	0.877835	12	CACNB4, RP11-41O4.1, ITGAM, AKR7L, SLIT3, NKAIN1, ZNF208, PON3, SEMA3D, SH3D19, SUPT3H, CMC1
20526872	MIMAT0028222	hsa-miR-7156-5p	0.68	0.86	1.1	0.09	0.18	0.11	-1.33	0.037993	-1.18	0.240048	16	DEFB132, C8orf4, GDA, HIST1H2BN, GPC6, SEMA3D, ZNF208, IFNE, GPRASP1, NKAIN1, RASEF, BICC1, LRP1B, SH3D19, CACNB4, PON3
20505788	MIMAT0004946	hsa-miR-744-3p	2.31	3.12	3.15	0.4	0.75	0.33	-1.78	0.107291	-1.02	0.883211	11	GLYATL2, BICC1, LETM2, C8orf4, GPRASP1, FSCN3, SUPT3H, ZNF208, SH3D19, IFNE, SLIT3
20528000	MIMAT0029310	hsa-miR-7515	1.91	1.04	0.92	0.56	0.21	0.29	1.99	0.17678	1.09	0.797481	13	CYP4A11, CLDN7, KLK5, GDA, NKAIN1, LETM2, CACNB4, GPC6, SLIT3, HIST1H2BN, SUPT3H, ARGFX, PON3
20535464	MI0004065	hsa-mir-759	0.91	1.55	1.01	0.17	0.25	0.06	-1.07	0.797599	1.46	0.115234	12	RP11-41O4.1, CYP4F2, CLDN7, TMCC3, CACNB4, AKR7L, NKAIN1, GPRASP1, BICC1, RAB19, IFNE, ARGFX
20504594	MIMAT0010367	hsa-miR-764	1.14	1.61	0.67	0.25	0.6	0.14	1.38	0.013139	1.91	0.07696	10	BICC1, TMCC3, IFNE, RAB19, ZNF208, NKAIN1, SLIT3, HIST1H2BN, SUPT3H, SH3D19
20528493	MIMAT0029782	hsa-miR-7641	10.17	10.07	10.55	0.83	1.1	0.82	-1.31	0.640652	-1.4	0.620453	9	ARGFX, SLIT3, IFNE, HIST1H2BN, SUPT3H, RASEF, SH3D19, CMC1, GPC6
20537978	MI0025239	hsa-mir-7703	0.96	1.14	1.43	0.04	0.1	0.31	-1.38	0.089911	-1.22	0.176616	13	APOBEC3G, TEX13A, CACNB4, CYP4F2, ZNF208, TMCC3, SEMA3D, LRP1B, HIST1H2BN, SH3D19, RAB19, PCDHB13, ARGFX
20529136	MIMAT0030419	hsa-miR-7844-5p	0.78	1.35	1.19	0.19	0.36	0.44	-1.33	0.22765	1.12	0.840726	10	C8orf4, GPC6, C6orf222, AC090616.2, RASEF, TMCC3, SH3D19, SUPT3H, CMC1, ARGFX
20529142	MIMAT0030425	hsa-miR-7850-5p	0.97	0.77	0.58	0.27	0.11	0.28	1.31	0.00043	1.14	0.589716	14	NKAIN1, SH3D19, KLK5, SEMA3D, GDA, LETM2, CACNB4, ZNF208, LRP1B, GPC6, BICC1, IFNE, CMC1, ARGFX
20529146	MIMAT0030429	hsa-miR-7854-3p	3.05	2.09	2.13	0.34	1.23	0.26	1.88	0.148117	-1.03	0.9985	10	NKAIN1, GDA, ZNF208, ITGAM, TMCC3, RAB19, IFNE, RASEF, ARGFX, SH3D19
20529565	MIMAT0031177	hsa-miR-7974	1.4	0.99	1.65	0.34	1.14	0.42	-1.19	0.864137	-1.57	0.983509	12	CYP4F2, GPC6, CYP4A11, LRRC4B, SEMA3D, SLIT3, IFNE, GPRASP1, CACNB4, CMC1, SH3D19, ARGFX
20529770	MIMAT0030987	hsa-miR-8060	3.2	3.41	3.96	0.8	0.3	0.65	-1.68	0.153306	-1.46	0.759393	16	PRR15, TMCC3, TRIM49, IFNA1, GLYATL2, LETM2, RASEF, HIST1H2BN, C6orf222, GPC6, SH3D19, CMC1, GDA, IFNE, ZNF208, CACNB4
20529772	MIMAT0030989	hsa-miR-8062	0.7	1.23	0.67	0.1	0.18	0.07	1.02	0.709523	1.47	0.081371	11	UGT2A1, SMR3A, GDA, CACNB4, TMCC3, SEMA3D, NKAIN1, BICC1, ZNF208, CMC1, UGT2A1
20529773	MIMAT0030990	hsa-miR-8063	1.91	2.2	1.21	0.51	0.77	1.1	1.63	0.902499	1.99	0.7995	22	IFNE, INO80C, UGT2A1, SH3D19, RASEF, UGT2A1, KRTAP10-11, BICC1, GPC6, SEMA3D, GDA, PON3, GBP7, TMCC3, LRP1B, DEFB132, ZNF208, HOXD10, SLIT3, SUPT3H, PCDHB13, CMC1
20538027	MI0025905	hsa-mir-8069	0.92	1.01	1.33	0.08	0.31	0.44	-1.33	0.227184	-1.25	0.708702	11	GPC6, HIST1H2BN, TMCC3, SH3D19, GDA, SLIT3, CACNB4, SUPT3H, IFNE, CMC1, ARGFX
20529781	MIMAT0030998	hsa-miR-8071	3.09	4.09	4.67	0.04	0.78	1.22	-2.99	0.338807	-1.5	0.429839	9	DEFB132, KRTAP10-11, PRR15, NKAIN1, ZNF208, SLIT3, GDA, HIST1H2BN, SUPT3H
20529783	MIMAT0031000	hsa-miR-8073	3.41	3.41	3.8	1.03	0.46	0.33	-1.31	0.543096	-1.3	0.322605	10	SLIT3, GPC6, RAB19, HOXD10, ZNF208, C6orf222, IFNE, RASEF, SUPT3H, SH3D19
20529787	MIMAT0031004	hsa-miR-8077	1.13	1.25	0.83	0.13	0.41	0.09	1.23	0.028134	1.34	0.121859	10	NKAIN1, PGLYRP3, KRTAP10-11, C6orf222, AKR7L, SLIT3, TMCC3, GPC6, SEMA3D, BICC1
20538042	MI0025918	hsa-mir-8082	0.77	0.97	1.16	0.29	0.35	0.14	-1.31	0.351097	-1.14	0.936809	11	KRTAP10-11, NKAIN1, CLEC4M, TRIM49, BICC1, CYP4A11, SLIT3, AC090616.2, SUPT3H, PON3, ARGFX
20538043	MI0025919	hsa-mir-8083	0.81	1.2	1.26	0.89	0.3	0.32	-1.37	0.798039	-1.05	0.987599	10	GPRASP1, UGT2A1, TMCC3, UGT2A1, CMC1, TRIM49, ZNF208, SLIT3, SH3D19, ARGFX
20529795	MIMAT0031012	hsa-miR-8085	2.9	3.61	3.47	0.26	0.12	0.14	-1.49	0.021055	1.1	0.416422	17	NKAIN1, KRTAP10-3, AKR7L, UGT2A1, GDA, CYP4A11, UGT2A1, C6orf222, LRRC4B, HIST1H2BN, SLIT3, RAB19, IFNE, SUPT3H, ZNF208, ARGFX, PON3
20505797	MIMAT0022717	hsa-miR-873-3p	4.15	2.9	3.46	0.43	0.43	0.54	1.61	0.096518	-1.48	0.326195	11	KRTAP10-11, TRIM49, RP11-41O4.1, CACNB4, C6orf222, DEFB132, GPC6, SLIT3, SEMA3D, LRP1B, RAB19
20505792	MIMAT0004950	hsa-miR-877-3p	1.43	1.89	1.98	0.37	0.16	0.23	-1.46	0.040399	-1.07	0.556349	9	SLIT3, BICC1, TMCC3, SH3D19, RAB19, RASEF, GDA, CMC1, PON3
20525397	MIMAT0025857	hsa-miR-892c-5p	1.3	1.13	0.9	0.33	0.19	0.14	1.32	0.494744	1.18	0.126125	14	RP11-41O4.1, SEMA3D, AKR7L, SH3D19, TRIM49, CACNB4, GDA, ZNF208, GPRASP1, GPC6, TMCC3, IFNE, CMC1, PON3
20534614	MI0000468	hsa-mir-9-3	1.26	0.94	0.85	0.22	0.09	0.42	1.33	0.37702	1.06	0.964903	13	INO80C, GPC6, CLEC4M, SLIT3, GDA, TMCC3, BICC1, SEMA3D, C6orf222, GPRASP1, CACNB4, NKAIN1, ARGFX
20500764	MIMAT0000442	hsa-miR-9-3p	6.46	6.12	6.62	0.16	0.32	0.24	-1.12	0.573061	-1.41	0.382389	13	INO80C, GPC6, CLEC4M, SLIT3, GDA, TMCC3, BICC1, SEMA3D, C6orf222, GPRASP1, CACNB4, NKAIN1, ARGFX
20535681	MI0005714	hsa-mir-922	0.9	1.24	0.81	0.23	0.12	0.2	1.07	0.223193	1.35	0.1257	13	INO80C, KRTAP10-11, UGT2A1, LRP1B, RASEF, TMCC3, RAB19, ZNF208, SEMA3D, C6orf222, SLIT3, UGT2A1, C8orf4
20500172	MIMAT0004508	hsa-miR-92a-2-5p	1.16	1.07	1.52	0.89	0.41	0.27	-1.29	0.873763	-1.37	0.479174	10	NKAIN1, FSCN3, LRRC4B, KLK5, RAB19, TMCC3, SLIT3, LETM2, SH3D19, ARGFX
20506005	MIMAT0004979	hsa-miR-936	1.15	1.45	1.59	0.23	0.38	0.1	-1.36	0.155183	-1.1	0.629422	11	UGT2A1, GPRASP1, UGT2A1, NKAIN1, RASEF, C6orf222, ZNF208, RAB19, IFNE, TMCC3, AC090616.2
20506009	MIMAT0004982	hsa-miR-939-5p	3.15	4.03	3.11	0.58	0.48	0.77	1.03	0.614349	1.89	0.436254	11	AC090616.2, GPC6, KRTAP10-11, GDA, AKR7L, TMCC3, SH3D19, LETM2, CACNB4, SLIT3, RASEF
20506011	MIMAT0004983	hsa-miR-940	1.74	2.33	2.66	0.3	0.32	0.87	-1.89	0.322582	-1.26	0.567085	16	CYP4A11, CT45A6, SLIT3, UGT2A1, PRR15, LETM2, HIST1H2BN, IFNE, RAB19, NKAIN1, ZNF208, GPC6, SUPT3H, ARGFX, SH3D19, UGT2A1
20506014	MIMAT0026734	hsa-miR-942-3p	2.84	2.03	1.91	0.27	0.61	0.37	1.9	0.183984	1.09	0.740825	11	TAS2R30, CLDN7, C6orf222, HIST1H2BN, RASEF, SLIT3, ZNF208, CACNB4, ARGFX, SH3D19, SUPT3H
20500178	MIMAT0004510	hsa-miR-96-3p	1.61	1.82	1.04	0.72	0.33	0.28	1.48	0.486682	1.71	0.133228	9	CACNB4, IFNE, ZNF208, CYP4F2, NKAIN1, GPRASP1, SLIT3, CMC1, ARGFX
